# Supplementary material for: Amoebal Endosymbiont Neochlamydia Genome Sequence Illuminates the Bacterial Role in the Defense of the Host Amoebae against Legionella pneumophila
Source: PubMed Central journal article supplement (PMC3991601; doi:10.1371/journal.pone.0095166), 2014-04-18
Supplement: pone.0095166.s013.pdf [file pone.0095166.s013.pdf]

**Table S1. *Neochlamydia* S13 gene IDs with features**

| Number | contig_id | Gene feature_ID             | type | location         | start | stop  | strand | function                                                                                                  | Category                         |
|--------|-----------|-----------------------------|------|------------------|-------|-------|--------|-----------------------------------------------------------------------------------------------------------|----------------------------------|
| 1      | 1145      | <a href="#">NEOS13_0001</a> | peg  | 1145_88_237      | 88    | 237   | +      | Leucine-rich repeat containing protein                                                                    | Leucine-rich repeat              |
| 2      | 1206      | <a href="#">NEOS13_0002</a> | peg  | 1206_274_146     | 274   | 146   | -      | hypothetical protein                                                                                      |                                  |
| 3      | 1444      | <a href="#">NEOS13_0003</a> | peg  | 1444_32_166      | 32    | 166   | +      | hypothetical protein                                                                                      |                                  |
| 4      | 1480      | <a href="#">NEOS13_0004</a> | peg  | 1480_35_169      | 35    | 169   | +      | hypothetical protein                                                                                      |                                  |
| 5      | 1534      | <a href="#">NEOS13_0005</a> | peg  | 1534_190_71      | 190   | 71    | -      | hypothetical protein                                                                                      |                                  |
| 6      | 1565      | <a href="#">NEOS13_0006</a> | peg  | 1565_43_228      | 43    | 228   | +      | hypothetical protein                                                                                      |                                  |
| 7      | 1614      | <a href="#">NEOS13_0007</a> | peg  | 1614_181_41      | 181   | 41    | -      | hypothetical protein                                                                                      |                                  |
| 8      | 1707      | <a href="#">NEOS13_0008</a> | peg  | 1707_215_352     | 215   | 352   | +      | hypothetical protein                                                                                      |                                  |
| 9      | 1746      | <a href="#">NEOS13_0009</a> | peg  | 1746_2986_2348   | 2986  | 2348  | -      | hypothetical protein                                                                                      |                                  |
| 10     | 1969      | <a href="#">NEOS13_0010</a> | peg  | 1969_198_25      | 198   | 25    | -      | hypothetical protein                                                                                      |                                  |
| 11     | 2031      | <a href="#">NEOS13_0011</a> | peg  | 2031_286_110     | 286   | 110   | -      | hypothetical protein                                                                                      |                                  |
| 12     | 209       | <a href="#">NEOS13_0012</a> | peg  | 209_2_361        | 2     | 361   | +      | Leucine-rich repeat containing protein                                                                    | Leucine-rich repeat              |
| 13     | 2168      | <a href="#">NEOS13_0013</a> | peg  | 2168_243_127     | 243   | 127   | -      | hypothetical protein                                                                                      |                                  |
| 14     | 2168      | <a href="#">NEOS13_0014</a> | peg  | 2168_518_1780    | 518   | 1780  | +      | putative phosphoprotein phosphatase                                                                       |                                  |
| 15     | 2168      | <a href="#">NEOS13_0015</a> | peg  | 2168_1907_2023   | 1907  | 2023  | +      | hypothetical protein                                                                                      |                                  |
| 16     | 2168      | <a href="#">NEOS13_0016</a> | peg  | 2168_4084_2618   | 4084  | 2618  | -      | Photolyase protein family                                                                                 |                                  |
| 17     | 2168      | <a href="#">NEOS13_0017</a> | peg  | 2168_6567_4846   | 6567  | 4846  | -      | Leucine-rich repeat containing protein                                                                    | Leucine-rich repeat              |
| 18     | 2168      | <a href="#">NEOS13_0018</a> | peg  | 2168_6718_6834   | 6718  | 6834  | +      | hypothetical protein                                                                                      |                                  |
| 19     | 2168      | <a href="#">NEOS13_0019</a> | peg  | 2168_7328_7726   | 7328  | 7726  | +      | hypothetical protein                                                                                      |                                  |
| 20     | 2168      | <a href="#">NEOS13_0020</a> | peg  | 2168_7970_8515   | 7970  | 8515  | +      | hypothetical protein                                                                                      |                                  |
| 21     | 2220      | <a href="#">NEOS13_0021</a> | peg  | 2220_25_297      | 25    | 297   | +      | hypothetical protein                                                                                      |                                  |
| 22     | 2310      | <a href="#">NEOS13_0022</a> | peg  | 2310_709_233     | 709   | 233   | -      | hypothetical protein                                                                                      |                                  |
| 23     | 2310      | <a href="#">NEOS13_0023</a> | peg  | 2310_2288_840    | 2288  | 840   | -      | Probable low-affinity inorganic phosphate transporter                                                     |                                  |
| 24     | 2310      | <a href="#">NEOS13_0024</a> | peg  | 2310_2976_2299   | 2976  | 2299  | -      | Phosphate transport regulator (distant homolog of PhoU)                                                   |                                  |
| 25     | 2310      | <a href="#">NEOS13_0025</a> | peg  | 2310_3345_3491   | 3345  | 3491  | +      | hypothetical protein                                                                                      |                                  |
| 26     | 2406      | <a href="#">NEOS13_0026</a> | peg  | 2406_169_47      | 169   | 47    | -      | hypothetical protein                                                                                      |                                  |
| 27     | 2436      | <a href="#">NEOS13_0027</a> | peg  | 2436_153_443     | 153   | 443   | +      | putative lipoprotein                                                                                      |                                  |
| 28     | 2706      | <a href="#">NEOS13_0028</a> | peg  | 2706_13_156      | 13    | 156   | +      | hypothetical protein                                                                                      |                                  |
| 29     | 2750      | <a href="#">NEOS13_0029</a> | peg  | 2750_912_3479    | 912   | 3479  | +      | ATP-dependent Clp protease, ATP-binding subunit ClpC / Negative regulator of genetic competence clcC/mecB | Genetic_competence               |
| 30     | 2750      | <a href="#">NEOS13_0030</a> | peg  | 2750_3612_5360   | 3612  | 5360  | +      | hypothetical protein                                                                                      |                                  |
| 31     | 2750      | <a href="#">NEOS13_0031</a> | peg  | 2750_5369_7138   | 5369  | 7138  | +      | hypothetical protein                                                                                      |                                  |
| 32     | 2750      | <a href="#">NEOS13_0032</a> | peg  | 2750_7913_7224   | 7913  | 7224  | -      | PTS system, IIA component                                                                                 |                                  |
| 33     | 2750      | <a href="#">NEOS13_0033</a> | peg  | 2750_8377_7928   | 8377  | 7928  | -      | PTS system, IIA component                                                                                 |                                  |
| 34     | 2750      | <a href="#">NEOS13_0034</a> | peg  | 2750_8941_8489   | 8941  | 8489  | -      | Deoxyuridine 5'-triphosphate nucleotidohydrolase (EC 3.6.1.23)                                            |                                  |
| 35     | 2750      | <a href="#">NEOS13_0035</a> | peg  | 2750_9873_8947   | 9873  | 8947  | -      | Acetyl-coenzyme A carboxyl transferase beta chain (EC 6.4.1.2)                                            | Fatty_acid_initiation_elongation |
| 36     | 2750      | <a href="#">NEOS13_0036</a> | peg  | 2750_9858_9971   | 9858  | 9971  | +      | hypothetical protein                                                                                      |                                  |
| 37     | 2750      | <a href="#">NEOS13_0037</a> | peg  | 2750_10668_10033 | 10668 | 10033 | -      | Superoxide dismutase [Mn] (EC 1.15.1.1)                                                                   |                                  |
| 38     | 2858      | <a href="#">NEOS13_0038</a> | peg  | 2858_121_2       | 121   | 2     | -      | hypothetical protein                                                                                      |                                  |
| 39     | 2903      | <a href="#">NEOS13_0039</a> | peg  | 2903_122_235     | 122   | 235   | +      | hypothetical protein                                                                                      |                                  |
| 40     | 2903      | <a href="#">NEOS13_0040</a> | peg  | 2903_1559_429    | 1559  | 429   | -      | hypothetical protein                                                                                      |                                  |
| 41     | 2903      | <a href="#">NEOS13_0041</a> | peg  | 2903_2020_3399   | 2020  | 3399  | +      | GTPase and tRNA-U34 5-formylation enzyme TrmE                                                             |                                  |
| 42     | 2903      | <a href="#">NEOS13_0042</a> | peg  | 2903_3404_4027   | 3404  | 4027  | +      | Endonuclease III (EC 4.2.99.18)                                                                           |                                  |
| 43     | 2903      | <a href="#">NEOS13_0043</a> | peg  | 2903_4194_6311   | 4194  | 6311  | +      | hypothetical protein                                                                                      |                                  |
| 44     | 2903      | <a href="#">NEOS13_0044</a> | peg  | 2903_6627_6274   | 6627  | 6274  | -      | hypothetical protein                                                                                      |                                  |
| 45     | 2936      | <a href="#">NEOS13_0045</a> | peg  | 2936_408_560     | 408   | 560   | +      | hypothetical protein                                                                                      |                                  |
| 46     | 2936      | <a href="#">NEOS13_0046</a> | peg  | 2936_1617_547    | 1617  | 547   | -      | RecA protein                                                                                              |                                  |
| 47     | 2936      | <a href="#">NEOS13_0047</a> | peg  | 2936_2969_1842   | 2969  | 1842  | -      | hypothetical protein                                                                                      |                                  |
| 48     | 2936      | <a href="#">NEOS13_0048</a> | peg  | 2936_3751_3131   | 3751  | 3131  | -      | hypothetical protein                                                                                      |                                  |
| 49     | 2936      | <a href="#">NEOS13_0049</a> | peg  | 2936_5460_3772   | 5460  | 3772  | -      | hypothetical protein                                                                                      |                                  |
| 50     | 2936      | <a href="#">NEOS13_0050</a> | peg  | 2936_5583_5834   | 5583  | 5834  | +      | Cell division protein YlmG/Ycf19 (putative), YggT family                                                  |                                  |
| 51     | 2936      | <a href="#">NEOS13_0051</a> | peg  | 2936_5858_6874   | 5858  | 6874  | +      | tRNA dihydrouridine synthase B (EC 1.-.-.-)                                                               |                                  |
| 52     | 2936      | <a href="#">NEOS13_0052</a> | peg  | 2936_7111_7284   | 7111  | 7284  | +      | hypothetical protein                                                                                      |                                  |
| 53     | 2936      | <a href="#">NEOS13_0053</a> | peg  | 2936_7914_7798   | 7914  | 7798  | -      | hypothetical protein                                                                                      |                                  |
| 54     | 2936      | <a href="#">NEOS13_0054</a> | peg  | 2936_8110_8250   | 8110  | 8250  | +      | hypothetical protein                                                                                      |                                  |
| 55     | 2936      | <a href="#">NEOS13_0055</a> | peg  | 2936_8824_8372   | 8824  | 8372  | -      | hypothetical protein                                                                                      |                                  |
| 56     | 2936      | <a href="#">NEOS13_0056</a> | peg  | 2936_9189_9317   | 9189  | 9317  | +      | hypothetical protein                                                                                      |                                  |
| 57     | 2936      | <a href="#">NEOS13_0057</a> | peg  | 2936_9686_9474   | 9686  | 9474  | -      | hypothetical protein                                                                                      |                                  |
| 58     | 2936      | <a href="#">NEOS13_0058</a> | peg  | 2936_10176_9874  | 10176 | 9874  | -      | Bsr0701 protein                                                                                           |                                  |
| 59     | 2936      | <a href="#">NEOS13_0059</a> | peg  | 2936_13199_10548 | 13199 | 10548 | -      | Osmosensitive K+ channel histidine kinase KdpD (EC 2.7.3.-)                                               |                                  |
| 60     | 2936      | <a href="#">NEOS13_0060</a> | peg  | 2936_14499_17528 | 14499 | 17528 | +      | hypothetical protein                                                                                      |                                  |
| 61     | 2936      | <a href="#">NEOS13_0061</a> | peg  | 2936_17625_17792 | 17625 | 17792 | +      | hypothetical protein                                                                                      |                                  |
| 62     | 2936      | <a href="#">NEOS13_0062</a> | peg  | 2936_18797_20242 | 18797 | 20242 | +      | Heat shock protein Hsp70:G-protein beta WD-40 repeat                                                      |                                  |
| 63     | 2936      | <a href="#">NEOS13_0063</a> | peg  | 2936_22798_20537 | 22798 | 20537 | -      | DinG family ATP-dependent helicase YoaA                                                                   |                                  |
| 64     | 2936      | <a href="#">NEOS13_0064</a> | peg  | 2936_24776_23112 | 24776 | 23112 | -      | RNA polymerase sigma factor RpoD                                                                          |                                  |
| 65     | 2936      | <a href="#">NEOS13_0065</a> | peg  | 2936_25055_25927 | 25055 | 25927 | +      | competence protein CoiA                                                                                   | Genetic_competence               |
| 66     | 2936      | <a href="#">NEOS13_0066</a> | peg  | 2936_26283_25993 | 26283 | 25993 | -      | 30S ribosomal protein S20                                                                                 |                                  |
| 67     | 2936      | <a href="#">NEOS13_0067</a> | peg  | 2936_26424_27269 | 26424 | 27269 | +      | Ribosomal large subunit pseudouridine synthase D (EC 4.2.1.70)                                            |                                  |
| 68     | 2936      | <a href="#">NEOS13_0068</a> | peg  | 2936_27277_27705 | 27277 | 27705 | +      | hypothetical protein                                                                                      |                                  |
| 69     | 2936      | <a href="#">NEOS13_0069</a> | peg  | 2936_28224_29357 | 28224 | 29357 | +      | hypothetical protein                                                                                      |                                  |

|     |      |                               |     |                  |       |       |   |                                                                                        |                                                     |
|-----|------|-------------------------------|-----|------------------|-------|-------|---|----------------------------------------------------------------------------------------|-----------------------------------------------------|
| 70  | 2936 | <a href="#">NEOS13_0070</a>   | peg | 2936_29439_30023 | 29439 | 30023 | + | 16S rRNA (guanine(966)-N(2))-methyltransferase (EC 2.1.1.171) ##<br>SSU rRNA m(2)G966  |                                                     |
| 71  | 2937 | <a href="#">NEOS13_0071</a>   | peg | 2937_152_27      | 152   | 27    | - | hypothetical protein                                                                   |                                                     |
| 72  | 2937 | <a href="#">NEOS13_0072</a>   | peg | 2937_528_1121    | 528   | 1121  | + | hypothetical protein                                                                   |                                                     |
| 73  | 2937 | <a href="#">NEOS13_0073</a>   | peg | 2937_1513_1313   | 1513  | 1313  | - | hypothetical protein                                                                   |                                                     |
| 74  | 3111 | <a href="#">NEOS13_0074</a>   | peg | 3111_280_149     | 280   | 149   | - | hypothetical protein                                                                   |                                                     |
| 75  | 3214 | <a href="#">NEOS13_0075</a>   | peg | 3214_54_1730     | 54    | 1730  | + | hypothetical protein                                                                   |                                                     |
| 76  | 3214 | <a href="#">NEOS13_0076</a>   | peg | 3214_2174_2007   | 2174  | 2007  | - | hypothetical protein                                                                   |                                                     |
| 77  | 3214 | <a href="#">NEOS13_0077</a>   | peg | 3214_2686_2814   | 2686  | 2814  | + | hypothetical protein                                                                   |                                                     |
| 78  | 3319 | <a href="#">NEOS13_0078</a>   | peg | 3319_1067_285    | 1067  | 285   | - | conserved hypothetical protein                                                         |                                                     |
| 79  | 3320 | <a href="#">NEOS13_0079</a>   | peg | 3320_470_180     | 470   | 180   | - | hypothetical protein                                                                   |                                                     |
| 80  | 3320 | <a href="#">NEOS13_0080</a>   | peg | 3320_1869_895    | 1869  | 895   | - | tRNA dihydrouridine synthase B (EC 1.-.-.)                                             |                                                     |
| 81  | 3320 | <a href="#">NEOS13_0081</a>   | peg | 3320_2632_2321   | 2632  | 2321  | - | hypothetical protein                                                                   |                                                     |
| 82  | 3320 | <a href="#">NEOS13_0082</a>   | peg | 3320_2774_4216   | 2774  | 4216  | + | 2-oxoglutarate/malate translocator                                                     |                                                     |
| 83  | 3320 | <a href="#">NEOS13_0083</a>   | peg | 3320_5157_4303   | 5157  | 4303  | - | Peptide methionine sulfoxide reductase MsrA (EC 1.8.4.11)                              |                                                     |
| 84  | 3320 | <a href="#">NEOS13_0084</a>   | peg | 3320_5596_5826   | 5596  | 5826  | + | hypothetical protein                                                                   |                                                     |
| 85  | 3321 | <a href="#">NEOS13_0085</a>   | peg | 3321_202_71      | 202   | 71    | - | hypothetical protein                                                                   |                                                     |
| 86  | 3321 | <a href="#">NEOS13_0086</a>   | peg | 3321_265_381     | 265   | 381   | + | hypothetical protein                                                                   |                                                     |
| 87  | 3321 | <a href="#">NEOS13_0087</a>   | peg | 3321_1868_546    | 1868  | 546   | - | Leucine-rich repeat containing protein                                                 | Leucine-rich repeat                                 |
| 88  | 3322 | <a href="#">NEOS13_0088</a>   | peg | 3322_95_844      | 95    | 844   | + | hypothetical protein                                                                   |                                                     |
| 89  | 3322 | <a href="#">NEOS13_0089</a>   | peg | 3322_1860_850    | 1860  | 850   | - | hypothetical protein                                                                   |                                                     |
| 90  | 3322 | <a href="#">NEOS13_0090</a>   | peg | 3322_2605_1826   | 2605  | 1826  | - | hypothetical protein                                                                   |                                                     |
| 91  | 3322 | <a href="#">NEOS13_0091</a>   | peg | 3322_2806_2606   | 2806  | 2606  | - | hypothetical protein                                                                   |                                                     |
| 92  | 3322 | <a href="#">NEOS13_0092</a>   | peg | 3322_3554_6112   | 3554  | 6112  | + | Glycogen phosphorylase (EC 2.4.1.1)                                                    |                                                     |
| 93  | 3322 | <a href="#">NEOS13_0093</a>   | peg | 3322_6892_6158   | 6892  | 6158  | - | putative amino acid ABC transporter, periplasmic amino acid-binding protein            | ABC_transporter                                     |
| 94  | 3322 | <a href="#">NEOS13_0094</a>   | peg | 3322_7350_7237   | 7350  | 7237  | - | hypothetical protein                                                                   |                                                     |
| 95  | 3322 | <a href="#">NEOS13_0095</a>   | peg | 3322_8014_9360   | 8014  | 9360  | + | Glucose-1-phosphate adenylyltransferase (EC 2.7.7.27)                                  |                                                     |
| 96  | 3322 | <a href="#">NEOS13_0096</a>   | peg | 3322_9376_10128  | 9376  | 10128 | + | hypothetical protein                                                                   |                                                     |
| 97  | 3322 | <a href="#">NEOS13_0097</a>   | peg | 3322_10612_10737 | 10612 | 10737 | + | hypothetical protein                                                                   |                                                     |
| 98  | 3322 | <a href="#">NEOS13_0098</a>   | peg | 3322_11641_11862 | 11641 | 11862 | + | hypothetical protein                                                                   |                                                     |
| 99  | 3322 | <a href="#">NEOS13_0099</a>   | peg | 3322_12080_14659 | 12080 | 14659 | + | hypothetical protein                                                                   |                                                     |
| 100 | 3322 | <a href="#">NEOS13_0100</a>   | peg | 3322_14990_14826 | 14990 | 14826 | - | hypothetical protein                                                                   |                                                     |
| 101 | 3322 | <a href="#">NEOS13_0101</a>   | peg | 3322_15165_15043 | 15165 | 15043 | - | hypothetical protein                                                                   |                                                     |
| 102 | 3322 | <a href="#">NEOS13_0102</a>   | peg | 3322_15750_16610 | 15750 | 16610 | + | Putative secreted protein                                                              |                                                     |
| 103 | 3322 | <a href="#">NEOS13_0103</a>   | peg | 3322_17025_17771 | 17025 | 17771 | + | Mobile element protein                                                                 |                                                     |
| 104 | 3322 | <a href="#">NEOS13_0104</a>   | peg | 3322_18327_18106 | 18327 | 18106 | - | Leucine-rich repeat containing protein                                                 | Leucine-rich repeat                                 |
| 105 | 3324 | <a href="#">NEOS13_0105</a>   | peg | 3324_2067_595    | 2067  | 595   | - | Leucine-rich repeat containing protein                                                 | Leucine-rich repeat                                 |
| 106 | 3324 | <a href="#">NEOS13_0106</a>   | peg | 3324_2453_2722   | 2453  | 2722  | + | hypothetical protein                                                                   |                                                     |
| 107 | 3326 | <a href="#">NEOS13_0001ma</a> | rna | 3326_422_3449    | 422   | 3449  | + | Large Subunit Ribosomal RNA; lsuRNA; LSU rRNA                                          | RNA                                                 |
| 108 | 3327 | <a href="#">NEOS13_0002ma</a> | rna | 3327_234_306     | 234   | 306   | + | tRNA-Ala-TGC                                                                           | RNA                                                 |
| 109 | 3327 | <a href="#">NEOS13_0003ma</a> | rna | 3327_319_392     | 319   | 392   | + | tRNA-Ile-GAT                                                                           | RNA                                                 |
| 110 | 3327 | <a href="#">NEOS13_0004ma</a> | rna | 3327_769_3796    | 769   | 3796  | + | Large Subunit Ribosomal RNA; lsuRNA; LSU rRNA                                          | RNA                                                 |
| 111 | 3328 | <a href="#">NEOS13_0107</a>   | peg | 3328_38_415      | 38    | 415   | + | Mobile element protein                                                                 |                                                     |
| 112 | 3328 | <a href="#">NEOS13_0108</a>   | peg | 3328_1293_538    | 1293  | 538   | - | Leucine-rich repeat containing protein                                                 | Leucine-rich repeat                                 |
| 113 | 3329 | <a href="#">NEOS13_0109</a>   | peg | 3329_89_850      | 89    | 850   | + | Leucine-rich repeat containing protein                                                 | Leucine-rich repeat                                 |
| 114 | 3329 | <a href="#">NEOS13_0110</a>   | peg | 3329_823_1044    | 823   | 1044  | + | Leucine-rich repeat containing protein                                                 | Leucine-rich repeat                                 |
| 115 | 3330 | <a href="#">NEOS13_0111</a>   | peg | 3330_27_467      | 27    | 467   | + | Leucine-rich repeat containing protein                                                 | Leucine-rich repeat                                 |
| 116 | 3331 | <a href="#">NEOS13_0112</a>   | peg | 3331_1051_110    | 1051  | 110   | - | Leucine-rich repeat containing protein                                                 | Leucine-rich repeat                                 |
| 117 | 3332 | <a href="#">NEOS13_0113</a>   | peg | 3332_165_350     | 165   | 350   | + | hypothetical protein                                                                   |                                                     |
| 118 | 3332 | <a href="#">NEOS13_0114</a>   | peg | 3332_483_361     | 483   | 361   | - | hypothetical protein                                                                   |                                                     |
| 119 | 3332 | <a href="#">NEOS13_0115</a>   | peg | 3332_1015_533    | 1015  | 533   | - | hypothetical protein                                                                   |                                                     |
| 120 | 3332 | <a href="#">NEOS13_0116</a>   | peg | 3332_2067_1516   | 2067  | 1516  | - | hypothetical protein                                                                   |                                                     |
| 121 | 3332 | <a href="#">NEOS13_0117</a>   | peg | 3332_4464_2080   | 4464  | 2080  | - | hypothetical protein                                                                   |                                                     |
| 122 | 3333 | <a href="#">NEOS13_0118</a>   | peg | 3333_1274_513    | 1274  | 513   | - | hypothetical protein                                                                   |                                                     |
| 123 | 3333 | <a href="#">NEOS13_0119</a>   | peg | 3333_2701_1676   | 2701  | 1676  | - | Transposase                                                                            | Transposase                                         |
| 124 | 3333 | <a href="#">NEOS13_0120</a>   | peg | 3333_3010_2729   | 3010  | 2729  | - | hypothetical protein                                                                   |                                                     |
| 125 | 3333 | <a href="#">NEOS13_0121</a>   | peg | 3333_3325_3441   | 3325  | 3441  | + | hypothetical protein                                                                   |                                                     |
| 126 | 3333 | <a href="#">NEOS13_0122</a>   | peg | 3333_3751_3626   | 3751  | 3626  | - | hypothetical protein                                                                   |                                                     |
| 127 | 3333 | <a href="#">NEOS13_0123</a>   | peg | 3333_3713_3910   | 3713  | 3910  | + | hypothetical protein                                                                   |                                                     |
| 128 | 3333 | <a href="#">NEOS13_0124</a>   | peg | 3333_4068_4472   | 4068  | 4472  | + | Mobile element protein                                                                 |                                                     |
| 129 | 3334 | <a href="#">NEOS13_0125</a>   | peg | 3334_471_938     | 471   | 938   | + | Retron-type RNA-directed DNA polymerase (EC 2.7.7.49)                                  |                                                     |
| 130 | 3336 | <a href="#">NEOS13_0126</a>   | peg | 3336_2729_195    | 2729  | 195   | - | Leucine-rich repeat containing protein                                                 | Leucine-rich repeat                                 |
| 131 | 3336 | <a href="#">NEOS13_0127</a>   | peg | 3336_4101_3121   | 4101  | 3121  | - | YgjD/Kae1/Orf7 family, required for threonylcarbamoyladenine (t(6)A) formation in tRNA |                                                     |
| 132 | 3336 | <a href="#">NEOS13_0128</a>   | peg | 3336_4177_4308   | 4177  | 4308  | + | hypothetical protein                                                                   |                                                     |
| 133 | 3336 | <a href="#">NEOS13_0129</a>   | peg | 3336_5244_4477   | 5244  | 4477  | - | 6-phosphogluconolactonase (EC 3.1.1.31), eukaryotic type                               | Pentose_phosphate_pathway<br>Enter_Doudroff_pathway |
| 134 | 3336 | <a href="#">NEOS13_0130</a>   | peg | 3336_6946_5381   | 6946  | 5381  | - | Glucose-6-phosphate 1-dehydrogenase (EC 1.1.1.49)                                      | Pentose_phosphate_pathway<br>Enter_Doudroff_pathway |
| 135 | 3336 | <a href="#">NEOS13_0131</a>   | peg | 3336_7580_7053   | 7580  | 7053  | - | Protein of unknown function DUF55                                                      |                                                     |
| 136 | 3336 | <a href="#">NEOS13_0132</a>   | peg | 3336_8061_7570   | 8061  | 7570  | - | Putative Holliday junction resolvase (EC 3.1.-.-)                                      |                                                     |
| 137 | 3336 | <a href="#">NEOS13_0133</a>   | peg | 3336_9677_8058   | 9677  | 8058  | - | CTP synthase (EC 6.3.4.2)                                                              |                                                     |
| 138 | 3336 | <a href="#">NEOS13_0134</a>   | peg | 3336_10432_9653  | 10432 | 9653  | - | 3-deoxy-manno-octulosonate cytidylyltransferase (EC 2.7.7.38)                          |                                                     |

|     |      |                               |     |                  |       |       |   |                                                                                    |                     |
|-----|------|-------------------------------|-----|------------------|-------|-------|---|------------------------------------------------------------------------------------|---------------------|
| 139 | 3336 | <a href="#">NEOS13_0135</a>   | peg | 3336_11868_10630 | 11868 | 10630 | - | Inner membrane protein YihY, formerly thought to be RNase BN                       |                     |
| 140 | 3336 | <a href="#">NEOS13_0136</a>   | peg | 3336_11871_11987 | 11871 | 11987 | + | hypothetical protein                                                               |                     |
| 141 | 3336 | <a href="#">NEOS13_0137</a>   | peg | 3336_12314_12057 | 12314 | 12057 | - | hypothetical protein                                                               |                     |
| 142 | 3336 | <a href="#">NEOS13_0138</a>   | peg | 3336_12731_12600 | 12731 | 12600 | - | hypothetical protein                                                               |                     |
| 143 | 3336 | <a href="#">NEOS13_0139</a>   | peg | 3336_12735_12929 | 12735 | 12929 | + | hypothetical protein                                                               |                     |
| 144 | 3336 | <a href="#">NEOS13_0140</a>   | peg | 3336_14334_13009 | 14334 | 13009 | - | hypothetical protein                                                               |                     |
| 145 | 3336 | <a href="#">NEOS13_0141</a>   | peg | 3336_15080_14958 | 15080 | 14958 | - | hypothetical protein                                                               |                     |
| 146 | 3336 | <a href="#">NEOS13_0142</a>   | peg | 3336_15497_15345 | 15497 | 15345 | - | Mobile element protein                                                             |                     |
| 147 | 3336 | <a href="#">NEOS13_0143</a>   | peg | 3336_15984_15625 | 15984 | 15625 | - | putative transposase                                                               | Transposase         |
| 148 | 3336 | <a href="#">NEOS13_0144</a>   | peg | 3336_16521_16117 | 16521 | 16117 | - | transcriptional regulator, XRE family                                              |                     |
| 149 | 3336 | <a href="#">NEOS13_0145</a>   | peg | 3336_16853_16527 | 16853 | 16527 | - | Protein of unknown function DUF891                                                 |                     |
| 150 | 3336 | <a href="#">NEOS13_0146</a>   | peg | 3336_17475_18062 | 17475 | 18062 | + | hypothetical protein                                                               |                     |
| 151 | 3336 | <a href="#">NEOS13_0147</a>   | peg | 3336_18398_18285 | 18398 | 18285 | - | hypothetical protein                                                               |                     |
| 152 | 3336 | <a href="#">NEOS13_0148</a>   | peg | 3336_18732_18848 | 18732 | 18848 | + | hypothetical protein                                                               |                     |
| 153 | 3336 | <a href="#">NEOS13_0149</a>   | peg | 3336_19031_19978 | 19031 | 19978 | + | hypothetical protein                                                               |                     |
| 154 | 3336 | <a href="#">NEOS13_0150</a>   | peg | 3336_20061_21554 | 20061 | 21554 | + | hypothetical protein                                                               |                     |
| 155 | 3336 | <a href="#">NEOS13_0151</a>   | peg | 3336_21581_28372 | 21581 | 28372 | + | ankyrin repeat protein                                                             | Ankyrin             |
| 156 | 3336 | <a href="#">NEOS13_0152</a>   | peg | 3336_28582_32010 | 28582 | 32010 | + | hypothetical protein                                                               |                     |
| 157 | 3337 | <a href="#">NEOS13_0153</a>   | peg | 3337_9_143       | 9     | 143   | + | hypothetical protein                                                               |                     |
| 158 | 3337 | <a href="#">NEOS13_0154</a>   | peg | 3337_1481_873    | 1481  | 873   | - | hypothetical protein                                                               |                     |
| 159 | 3338 | <a href="#">NEOS13_0155</a>   | peg | 3338_556_954     | 556   | 954   | + | hypothetical protein                                                               |                     |
| 160 | 3338 | <a href="#">NEOS13_0156</a>   | peg | 3338_947_1228    | 947   | 1228  | + | hypothetical protein                                                               |                     |
| 161 | 3338 | <a href="#">NEOS13_0157</a>   | peg | 3338_1260_1424   | 1260  | 1424  | + | hypothetical protein                                                               |                     |
| 162 | 3339 | <a href="#">NEOS13_0158</a>   | peg | 3339_809_1909    | 809   | 1909  | + | GTP-binding and nucleic acid-binding protein YchF                                  |                     |
| 163 | 3339 | <a href="#">NEOS13_0159</a>   | peg | 3339_1922_3064   | 1922  | 3064  | + | Methyltransferase (EC 2.1.1.-)                                                     |                     |
| 164 | 3339 | <a href="#">NEOS13_0160</a>   | peg | 3339_5839_3323   | 5839  | 3323  | - | ATP-dependent protease La (EC 3.4.21.53) Type I                                    |                     |
| 165 | 3339 | <a href="#">NEOS13_0161</a>   | peg | 3339_6217_7371   | 6217  | 7371  | + | Deoxyguanosinetriphosphate triphosphohydrolase (EC 3.1.5.1)                        |                     |
| 166 | 3339 | <a href="#">NEOS13_0162</a>   | peg | 3339_7359_8045   | 7359  | 8045  | + | Inactive homolog of metal-dependent proteases, putative molecular chaperone        |                     |
| 167 | 3339 | <a href="#">NEOS13_0163</a>   | peg | 3339_8144_8323   | 8144  | 8323  | + | SSU ribosomal protein S21p                                                         |                     |
| 168 | 3339 | <a href="#">NEOS13_0164</a>   | peg | 3339_8461_9657   | 8461  | 9657  | + | Chaperone protein DnaJ                                                             |                     |
| 169 | 3339 | <a href="#">NEOS13_0165</a>   | peg | 3339_10138_11112 | 10138 | 11112 | + | hypothetical protein                                                               |                     |
| 170 | 3339 | <a href="#">NEOS13_0166</a>   | peg | 3339_11330_11461 | 11330 | 11461 | + | hypothetical protein                                                               |                     |
| 171 | 3340 | <a href="#">NEOS13_0167</a>   | peg | 3340_1664_6      | 1664  | 6     | - | Leucine-rich repeat containing protein                                             | Leucine-rich repeat |
| 172 | 3340 | <a href="#">NEOS13_0168</a>   | peg | 3340_2290_2147   | 2290  | 2147  | - | hypothetical protein                                                               |                     |
| 173 | 3340 | <a href="#">NEOS13_0169</a>   | peg | 3340_2406_2582   | 2406  | 2582  | + | hypothetical protein                                                               |                     |
| 174 | 3341 | <a href="#">NEOS13_0170</a>   | peg | 3341_179_400     | 179   | 400   | + | hypothetical protein                                                               |                     |
| 175 | 3341 | <a href="#">NEOS13_0171</a>   | peg | 3341_733_2337    | 733   | 2337  | + | V8-like Glu-specific endopeptidase                                                 |                     |
| 176 | 3341 | <a href="#">NEOS13_0172</a>   | peg | 3341_2601_3221   | 2601  | 3221  | + | hypothetical protein                                                               |                     |
| 177 | 3341 | <a href="#">NEOS13_0173</a>   | peg | 3341_3722_3465   | 3722  | 3465  | - | hypothetical protein                                                               |                     |
| 178 | 3341 | <a href="#">NEOS13_0174</a>   | peg | 3341_4957_4103   | 4957  | 4103  | - | hypothetical protein                                                               |                     |
| 179 | 3341 | <a href="#">NEOS13_0175</a>   | peg | 3341_5613_4960   | 5613  | 4960  | - | hypothetical protein                                                               |                     |
| 180 | 3342 | <a href="#">NEOS13_0176</a>   | peg | 3342_553_428     | 553   | 428   | - | hypothetical protein                                                               |                     |
| 181 | 3342 | <a href="#">NEOS13_0005ma</a> | rna | 3342_4071_1044   | 4071  | 1044  | - | Large Subunit Ribosomal RNA; lsuRNA; LSU rRNA                                      | RNA                 |
| 182 | 3343 | <a href="#">NEOS13_0177</a>   | peg | 3343_711_589     | 711   | 589   | - | hypothetical protein                                                               |                     |
| 183 | 3346 | <a href="#">NEOS13_0178</a>   | peg | 3346_39_476      | 39    | 476   | + | Mobile element protein                                                             |                     |
| 184 | 3347 | <a href="#">NEOS13_0179</a>   | peg | 3347_765_1430    | 765   | 1430  | + | hypothetical protein                                                               |                     |
| 185 | 3347 | <a href="#">NEOS13_0180</a>   | peg | 3347_1551_1685   | 1551  | 1685  | + | hypothetical protein                                                               |                     |
| 186 | 3347 | <a href="#">NEOS13_0181</a>   | peg | 3347_2187_2303   | 2187  | 2303  | + | hypothetical protein                                                               |                     |
| 187 | 3347 | <a href="#">NEOS13_0182</a>   | peg | 3347_2973_2848   | 2973  | 2848  | - | hypothetical protein                                                               |                     |
| 188 | 3347 | <a href="#">NEOS13_0183</a>   | peg | 3347_3469_3290   | 3469  | 3290  | - | Protein of unknown function DUF891                                                 |                     |
| 189 | 3347 | <a href="#">NEOS13_0184</a>   | peg | 3347_3950_4876   | 3950  | 4876  | + | hypothetical protein                                                               |                     |
| 190 | 3347 | <a href="#">NEOS13_0185</a>   | peg | 3347_4997_5143   | 4997  | 5143  | + | hypothetical protein                                                               |                     |
| 191 | 3347 | <a href="#">NEOS13_0186</a>   | peg | 3347_5645_5436   | 5645  | 5436  | - | hypothetical protein                                                               |                     |
| 192 | 3347 | <a href="#">NEOS13_0187</a>   | peg | 3347_5681_6472   | 5681  | 6472  | + | ISSod10, transposase OrfB                                                          | Transposase         |
| 193 | 3347 | <a href="#">NEOS13_0188</a>   | peg | 3347_7967_6705   | 7967  | 6705  | - | Hypothetical protein YggS, proline synthase co-transcribed bacterial homolog PROSC |                     |
| 194 | 3347 | <a href="#">NEOS13_0189</a>   | peg | 3347_8870_8193   | 8870  | 8193  | - | hypothetical protein                                                               |                     |
| 195 | 3347 | <a href="#">NEOS13_0190</a>   | peg | 3347_9436_8873   | 9436  | 8873  | - | hypothetical protein                                                               |                     |
| 196 | 3347 | <a href="#">NEOS13_0191</a>   | peg | 3347_10616_9597  | 10616 | 9597  | - | DUF1432 domain-containing protein                                                  |                     |
| 197 | 3347 | <a href="#">NEOS13_0192</a>   | peg | 3347_11081_10620 | 11081 | 10620 | - | YqeZ                                                                               |                     |
| 198 | 3347 | <a href="#">NEOS13_0193</a>   | peg | 3347_11283_11143 | 11283 | 11143 | - | hypothetical protein                                                               |                     |
| 199 | 3347 | <a href="#">NEOS13_0194</a>   | peg | 3347_11890_11249 | 11890 | 11249 | - | Inorganic pyrophosphatase (EC 3.6.1.1)                                             |                     |
| 200 | 3347 | <a href="#">NEOS13_0195</a>   | peg | 3347_12151_13371 | 12151 | 13371 | + | cytosine permease                                                                  |                     |
| 201 | 3347 | <a href="#">NEOS13_0196</a>   | peg | 3347_13355_14434 | 13355 | 14434 | + | protein of unknown function DUF917                                                 |                     |
| 202 | 3347 | <a href="#">NEOS13_0197</a>   | peg | 3347_14431_15999 | 14431 | 15999 | + | N-methylhydantoinase (ATP-hydrolyzing) (EC 3.5.2.14)                               |                     |
| 203 | 3347 | <a href="#">NEOS13_0198</a>   | peg | 3347_17346_16039 | 17346 | 16039 | - | Glutamate-1-semialdehyde aminotransferase (EC 5.4.3.8)                             |                     |
| 204 | 3347 | <a href="#">NEOS13_0199</a>   | peg | 3347_18851_17574 | 18851 | 17574 | - | hypothetical protein                                                               |                     |
| 205 | 3347 | <a href="#">NEOS13_0200</a>   | peg | 3347_19157_20938 | 19157 | 20938 | + | hypothetical protein                                                               |                     |
| 206 | 3347 | <a href="#">NEOS13_0201</a>   | peg | 3347_20940_24485 | 20940 | 24485 | + | hypothetical protein                                                               |                     |
| 207 | 3347 | <a href="#">NEOS13_0202</a>   | peg | 3347_24603_24463 | 24603 | 24463 | - | hypothetical protein                                                               |                     |
| 208 | 3347 | <a href="#">NEOS13_0203</a>   | peg | 3347_24737_25651 | 24737 | 25651 | + | FIG00899508: hypothetical protein                                                  |                     |
| 209 | 3347 | <a href="#">NEOS13_0204</a>   | peg | 3347_25662_26456 | 25662 | 26456 | + | Methionine ABC transporter ATP-binding protein                                     | ABC_transporter     |
| 210 | 3347 | <a href="#">NEOS13_0205</a>   | peg | 3347_26453_27640 | 26453 | 27640 | + | FIG00899462: hypothetical protein                                                  |                     |
| 211 | 3347 | <a href="#">NEOS13_0206</a>   | peg | 3347_27711_28280 | 27711 | 28280 | + | transcriptional regulator, putative                                                |                     |
| 212 | 3347 | <a href="#">NEOS13_0207</a>   | peg | 3347_28306_29016 | 28306 | 29016 | + | conserved hypothetical protein                                                     |                     |
| 213 | 3347 | <a href="#">NEOS13_0208</a>   | peg | 3347_29233_29358 | 29233 | 29358 | + | hypothetical protein                                                               |                     |
| 214 | 3347 | <a href="#">NEOS13_0209</a>   | peg | 3347_29514_30863 | 29514 | 30863 | + | ankyrin repeat protein                                                             | Ankyrin             |

|     |      |                             |     |                  |       |       |   |                                                                                                                                             |                                  |
|-----|------|-----------------------------|-----|------------------|-------|-------|---|---------------------------------------------------------------------------------------------------------------------------------------------|----------------------------------|
| 215 | 3347 | <a href="#">NEOS13_0210</a> | peg | 3347_31354_31094 | 31354 | 31094 | - | hypothetical protein                                                                                                                        |                                  |
| 216 | 3347 | <a href="#">NEOS13_0211</a> | peg | 3347_31960_31574 | 31960 | 31574 | - | SSU ribosomal protein S9p (S16e)                                                                                                            |                                  |
| 217 | 3347 | <a href="#">NEOS13_0212</a> | peg | 3347_32421_31975 | 32421 | 31975 | - | LSU ribosomal protein L13p (L13Ac)                                                                                                          |                                  |
| 218 | 3347 | <a href="#">NEOS13_0213</a> | peg | 3347_32690_34027 | 32690 | 34027 | + | tRNA-i(6)A37 methylthiotransferase                                                                                                          |                                  |
| 219 | 3347 | <a href="#">NEOS13_0214</a> | peg | 3347_36236_34245 | 36236 | 34245 | - | DNA ligase (EC 6.5.1.2)                                                                                                                     |                                  |
| 220 | 3347 | <a href="#">NEOS13_0215</a> | peg | 3347_38415_36244 | 38415 | 36244 | - | 1,4-alpha-glucan (glycogen) branching enzyme, GH-13-type (EC 2.4.1.18)                                                                      |                                  |
| 221 | 3347 | <a href="#">NEOS13_0216</a> | peg | 3347_38914_38798 | 38914 | 38798 | - | hypothetical protein                                                                                                                        |                                  |
| 222 | 3347 | <a href="#">NEOS13_0217</a> | peg | 3347_39481_40833 | 39481 | 40833 | + | hypothetical protein                                                                                                                        |                                  |
| 223 | 3347 | <a href="#">NEOS13_0218</a> | peg | 3347_41108_40992 | 41108 | 40992 | - | hypothetical protein                                                                                                                        |                                  |
| 224 | 3347 | <a href="#">NEOS13_0219</a> | peg | 3347_41147_41266 | 41147 | 41266 | + | hypothetical protein                                                                                                                        |                                  |
| 225 | 3347 | <a href="#">NEOS13_0220</a> | peg | 3347_41418_41293 | 41418 | 41293 | - | hypothetical protein                                                                                                                        |                                  |
| 226 | 3347 | <a href="#">NEOS13_0221</a> | peg | 3347_41540_41412 | 41540 | 41412 | - | hypothetical protein                                                                                                                        |                                  |
| 227 | 3347 | <a href="#">NEOS13_0222</a> | peg | 3347_42009_41587 | 42009 | 41587 | - | hypothetical protein                                                                                                                        |                                  |
| 228 | 3347 | <a href="#">NEOS13_0223</a> | peg | 3347_42361_41987 | 42361 | 41987 | - | hypothetical protein                                                                                                                        |                                  |
| 229 | 3347 | <a href="#">NEOS13_0224</a> | peg | 3347_42536_42375 | 42536 | 42375 | - | hypothetical protein                                                                                                                        |                                  |
| 230 | 3347 | <a href="#">NEOS13_0225</a> | peg | 3347_43065_42694 | 43065 | 42694 | - | hypothetical protein                                                                                                                        |                                  |
| 231 | 3347 | <a href="#">NEOS13_0226</a> | peg | 3347_43582_43457 | 43582 | 43457 | - | hypothetical protein                                                                                                                        |                                  |
| 232 | 3347 | <a href="#">NEOS13_0227</a> | peg | 3347_43694_43807 | 43694 | 43807 | + | hypothetical protein                                                                                                                        |                                  |
| 233 | 3347 | <a href="#">NEOS13_0228</a> | peg | 3347_44937_43924 | 44937 | 43924 | - | FIG00494467: hypothetical protein                                                                                                           |                                  |
| 234 | 3347 | <a href="#">NEOS13_0229</a> | peg | 3347_46234_44942 | 46234 | 44942 | - | MiaB family protein, possibly involved in tRNA or rRNA modification                                                                         |                                  |
| 235 | 3347 | <a href="#">NEOS13_0230</a> | peg | 3347_47069_46359 | 47069 | 46359 | - | DNA repair protein RadC                                                                                                                     |                                  |
| 236 | 3347 | <a href="#">NEOS13_0231</a> | peg | 3347_47617_47120 | 47617 | 47120 | - | hypothetical protein                                                                                                                        |                                  |
| 237 | 3347 | <a href="#">NEOS13_0232</a> | peg | 3347_47940_48176 | 47940 | 48176 | + | hypothetical protein                                                                                                                        |                                  |
| 238 | 3347 | <a href="#">NEOS13_0233</a> | peg | 3347_48308_48967 | 48308 | 48967 | + | N-Acetylneuraminase cytidyltransferase (EC 2.7.7.43)                                                                                        |                                  |
| 239 | 3347 | <a href="#">NEOS13_0234</a> | peg | 3347_48970_50535 | 48970 | 50535 | + | N-acetylneuraminase synthase (EC 2.5.1.56)                                                                                                  |                                  |
| 240 | 3347 | <a href="#">NEOS13_0235</a> | peg | 3347_50571_51206 | 50571 | 51206 | + | HAD-superfamily hydrolase, subfamily IA, variant 3 protein family protein                                                                   |                                  |
| 241 | 3347 | <a href="#">NEOS13_0236</a> | peg | 3347_51193_51903 | 51193 | 51903 | + | hypothetical protein                                                                                                                        |                                  |
| 242 | 3348 | <a href="#">NEOS13_0237</a> | peg | 3348_15_1688     | 15    | 1688  | + | hypothetical protein                                                                                                                        |                                  |
| 243 | 3348 | <a href="#">NEOS13_0238</a> | peg | 3348_1973_1857   | 1973  | 1857  | - | hypothetical protein                                                                                                                        |                                  |
| 244 | 3348 | <a href="#">NEOS13_0239</a> | peg | 3348_2235_3125   | 2235  | 3125  | + | hypothetical protein                                                                                                                        |                                  |
| 245 | 3348 | <a href="#">NEOS13_0240</a> | peg | 3348_3252_5162   | 3252  | 5162  | + | ABC transporter ATP-binding protein                                                                                                         | ABC_transporter                  |
| 246 | 3348 | <a href="#">NEOS13_0241</a> | peg | 3348_6626_5670   | 6626  | 5670  | - | unknown protein                                                                                                                             |                                  |
| 247 | 3348 | <a href="#">NEOS13_0242</a> | peg | 3348_6951_7853   | 6951  | 7853  | + | Enoyl-[acyl-carrier-protein] reductase [NADH] (EC 1.3.1.9)                                                                                  | Fatty_acid_initiation_elongation |
| 248 | 3348 | <a href="#">NEOS13_0243</a> | peg | 3348_7896_8078   | 7896  | 8078  | + | hypothetical protein                                                                                                                        |                                  |
| 249 | 3348 | <a href="#">NEOS13_0244</a> | peg | 3348_8699_8163   | 8699  | 8163  | - | hypothetical protein                                                                                                                        |                                  |
| 250 | 3348 | <a href="#">NEOS13_0245</a> | peg | 3348_10528_9035  | 10528 | 9035  | - | hypothetical protein                                                                                                                        |                                  |
| 251 | 3348 | <a href="#">NEOS13_0246</a> | peg | 3348_11244_10531 | 11244 | 10531 | - | FoM Alternative dihydrofolate reductase 1                                                                                                   |                                  |
| 252 | 3348 | <a href="#">NEOS13_0247</a> | peg | 3348_11393_11241 | 11393 | 11241 | - | hypothetical protein                                                                                                                        |                                  |
| 253 | 3348 | <a href="#">NEOS13_0248</a> | peg | 3348_12015_11608 | 12015 | 11608 | - | putative dGTP pyrophosphohydrolase/dihydroneopterin aldolase (mutT/fofB, fusion protein)                                                    |                                  |
| 254 | 3348 | <a href="#">NEOS13_0249</a> | peg | 3348_12843_12058 | 12843 | 12058 | - | hypothetical protein                                                                                                                        |                                  |
| 255 | 3348 | <a href="#">NEOS13_0250</a> | peg | 3348_16233_13690 | 16233 | 13690 | - | DNA mismatch repair protein MutS                                                                                                            |                                  |
| 256 | 3348 | <a href="#">NEOS13_0251</a> | peg | 3348_17087_18535 | 17087 | 18535 | + | hypothetical protein                                                                                                                        |                                  |
| 257 | 3348 | <a href="#">NEOS13_0252</a> | peg | 3348_18589_18744 | 18589 | 18744 | + | hypothetical protein                                                                                                                        |                                  |
| 258 | 3348 | <a href="#">NEOS13_0253</a> | peg | 3348_19395_20486 | 19395 | 20486 | + | hypothetical protein                                                                                                                        |                                  |
| 259 | 3348 | <a href="#">NEOS13_0254</a> | peg | 3348_21024_20788 | 21024 | 20788 | - | Mobile element protein                                                                                                                      |                                  |
| 260 | 3348 | <a href="#">NEOS13_0255</a> | peg | 3348_21195_21326 | 21195 | 21326 | + | hypothetical protein                                                                                                                        |                                  |
| 261 | 3348 | <a href="#">NEOS13_0256</a> | peg | 3348_21571_21323 | 21571 | 21323 | - | Mobile element protein                                                                                                                      |                                  |
| 262 | 3348 | <a href="#">NEOS13_0257</a> | peg | 3348_21698_21582 | 21698 | 21582 | - | hypothetical protein                                                                                                                        |                                  |
| 263 | 3348 | <a href="#">NEOS13_0258</a> | peg | 3348_22703_21843 | 22703 | 21843 | - | hypothetical protein                                                                                                                        |                                  |
| 264 | 3348 | <a href="#">NEOS13_0259</a> | peg | 3348_23244_22696 | 23244 | 22696 | - | hypothetical protein                                                                                                                        |                                  |
| 265 | 3348 | <a href="#">NEOS13_0260</a> | peg | 3348_23682_25682 | 23682 | 25682 | + | FIG00899452: hypothetical protein                                                                                                           |                                  |
| 266 | 3348 | <a href="#">NEOS13_0261</a> | peg | 3348_26257_26475 | 26257 | 26475 | + | hypothetical protein                                                                                                                        |                                  |
| 267 | 3348 | <a href="#">NEOS13_0262</a> | peg | 3348_26459_27184 | 26459 | 27184 | + | Ubiquinone/menaquinone biosynthesis methyltransferase UbiE (EC 2.1.1.-) @ 2-heptaprenyl-1,4-naphthoquinone methyltransferase (EC 2.1.1.163) |                                  |
| 268 | 3348 | <a href="#">NEOS13_0263</a> | peg | 3348_28485_27460 | 28485 | 27460 | - | O-succinylbenzoic acid--CoA ligase (EC 6.2.1.26)                                                                                            |                                  |
| 269 | 3348 | <a href="#">NEOS13_0264</a> | peg | 3348_29638_28823 | 29638 | 28823 | - | transposase                                                                                                                                 | Transposase                      |
| 270 | 3348 | <a href="#">NEOS13_0265</a> | peg | 3348_30041_31246 | 30041 | 31246 | + | hypothetical protein                                                                                                                        |                                  |
| 271 | 3348 | <a href="#">NEOS13_0266</a> | peg | 3348_31373_31489 | 31373 | 31489 | + | hypothetical protein                                                                                                                        |                                  |
| 272 | 3348 | <a href="#">NEOS13_0267</a> | peg | 3348_32861_31464 | 32861 | 31464 | - | High-affinity carbon uptake protein Hat/HatR                                                                                                |                                  |
| 273 | 3348 | <a href="#">NEOS13_0268</a> | peg | 3348_34204_33263 | 34204 | 33263 | - | hypothetical protein                                                                                                                        |                                  |
| 274 | 3348 | <a href="#">NEOS13_0269</a> | peg | 3348_35109_34201 | 35109 | 34201 | - | 1,4-dihydroxy-2-naphthoate octaprenyltransferase (EC 2.5.1.74)                                                                              |                                  |
| 275 | 3348 | <a href="#">NEOS13_0270</a> | peg | 3348_35960_35130 | 35960 | 35130 | - | Naphthoate synthase (EC 4.1.3.36)                                                                                                           |                                  |
| 276 | 3348 | <a href="#">NEOS13_0271</a> | peg | 3348_36664_35951 | 36664 | 35951 | - | 2-succinyl-6-hydroxy-2,4-cyclohexadiene-1-carboxylate synthase (EC 4.2.99.20)                                                               |                                  |
| 277 | 3348 | <a href="#">NEOS13_0272</a> | peg | 3348_38259_36661 | 38259 | 36661 | - | 2-succinyl-5-enolpyruvyl-6-hydroxy-3-cyclohexene-1-carboxylic-acid synthase (EC 2.2.1.9)                                                    |                                  |
| 278 | 3348 | <a href="#">NEOS13_0273</a> | peg | 3348_39326_38256 | 39326 | 38256 | - | menaquinone-specific isochorismate synthase                                                                                                 |                                  |
| 279 | 3348 | <a href="#">NEOS13_0274</a> | peg | 3348_39987_39388 | 39987 | 39388 | - | hypothetical protein                                                                                                                        |                                  |
| 280 | 3348 | <a href="#">NEOS13_0275</a> | peg | 3348_40163_41161 | 40163 | 41161 | + | hypothetical protein                                                                                                                        |                                  |
| 281 | 3348 | <a href="#">NEOS13_0276</a> | peg | 3348_41401_42549 | 41401 | 42549 | + | Branched-chain amino acid transport system carrier protein                                                                                  |                                  |

|     |      |                               |     |                  |       |       |   |                                                                                                                                        |                     |
|-----|------|-------------------------------|-----|------------------|-------|-------|---|----------------------------------------------------------------------------------------------------------------------------------------|---------------------|
| 282 | 3348 | <a href="#">NEOS13_0277</a>   | peg | 3348_42657_43433 | 42657 | 43433 | + | hypothetical protein                                                                                                                   |                     |
| 283 | 3348 | <a href="#">NEOS13_0278</a>   | peg | 3348_44329_43943 | 44329 | 43943 | - | hypothetical protein                                                                                                                   |                     |
| 284 | 3348 | <a href="#">NEOS13_0279</a>   | peg | 3348_44458_45918 | 44458 | 45918 | + | 3'-to-5' exonuclease RNase R                                                                                                           |                     |
| 285 | 3348 | <a href="#">NEOS13_0280</a>   | peg | 3348_46110_45952 | 46110 | 45952 | - | hypothetical protein                                                                                                                   |                     |
| 286 | 3348 | <a href="#">NEOS13_0281</a>   | peg | 3348_46290_46150 | 46290 | 46150 | - | hypothetical protein                                                                                                                   |                     |
| 287 | 3348 | <a href="#">NEOS13_0282</a>   | peg | 3348_46448_46708 | 46448 | 46708 | + | DNA-damage-inducible protein J                                                                                                         |                     |
| 288 | 3348 | <a href="#">NEOS13_0283</a>   | peg | 3348_46701_46967 | 46701 | 46967 | + | hypothetical protein                                                                                                                   |                     |
| 289 | 3348 | <a href="#">NEOS13_0284</a>   | peg | 3348_50114_47253 | 50114 | 47253 | - | hypothetical protein                                                                                                                   |                     |
| 290 | 3348 | <a href="#">NEOS13_0285</a>   | peg | 3348_50537_50710 | 50537 | 50710 | + | hypothetical protein                                                                                                                   |                     |
| 291 | 3348 | <a href="#">NEOS13_0286</a>   | peg | 3348_51077_54445 | 51077 | 54445 | + | hypothetical protein                                                                                                                   |                     |
| 292 | 3348 | <a href="#">NEOS13_0287</a>   | peg | 3348_55703_54699 | 55703 | 54699 | - | DNA polymerase III delta prime subunit (EC 2.7.7.7)                                                                                    |                     |
| 293 | 3348 | <a href="#">NEOS13_0288</a>   | peg | 3348_56426_55782 | 56426 | 55782 | - | Thymidylate kinase (EC 2.7.4.9)                                                                                                        |                     |
| 294 | 3348 | <a href="#">NEOS13_0289</a>   | peg | 3348_59002_56423 | 59002 | 56423 | - | DNA gyrase subunit A (EC 5.99.1.3)                                                                                                     |                     |
| 295 | 3348 | <a href="#">NEOS13_0290</a>   | peg | 3348_61536_59032 | 61536 | 59032 | - | DNA gyrase subunit B (EC 5.99.1.3)                                                                                                     |                     |
| 296 | 3348 | <a href="#">NEOS13_0291</a>   | peg | 3348_61896_61558 | 61896 | 61558 | - | hypothetical protein                                                                                                                   |                     |
| 297 | 3348 | <a href="#">NEOS13_0292</a>   | peg | 3348_63066_62128 | 63066 | 62128 | - | 4-hydroxy-3-methylbut-2-enyl diphosphate reductase (EC 1.17.1.2)                                                                       |                     |
| 298 | 3348 | <a href="#">NEOS13_0293</a>   | peg | 3348_63708_63217 | 63708 | 63217 | - | Low molecular weight protein tyrosine phosphatase (EC 3.1.3.48)                                                                        |                     |
| 299 | 3348 | <a href="#">NEOS13_0294</a>   | peg | 3348_65634_63718 | 65634 | 63718 | - | Serine/threonine kinase                                                                                                                |                     |
| 300 | 3348 | <a href="#">NEOS13_0295</a>   | peg | 3348_66550_65645 | 66550 | 65645 | - | hypothetical protein                                                                                                                   |                     |
| 301 | 3348 | <a href="#">NEOS13_0296</a>   | peg | 3348_67058_69574 | 67058 | 69574 | + | Inner membrane protein translocase component YidC, long form / Inner membrane protein translocase component YidC, short form Oxal-like |                     |
| 302 | 3348 | <a href="#">NEOS13_0297</a>   | peg | 3348_69651_71024 | 69651 | 71024 | + | Chromosomal replication initiator protein DnaA                                                                                         |                     |
| 303 | 3348 | <a href="#">NEOS13_0006ma</a> | rna | 3348_71411_71485 | 71411 | 71485 | + | tRNA-Pro-TGG                                                                                                                           | RNA                 |
| 304 | 3348 | <a href="#">NEOS13_0298</a>   | peg | 3348_71542_72438 | 71542 | 72438 | + | Prolipoprotein diacylglycerol transferase (EC 2.4.99.-)                                                                                |                     |
| 305 | 3348 | <a href="#">NEOS13_0299</a>   | peg | 3348_72549_72773 | 72549 | 72773 | + | Ferredoxin                                                                                                                             |                     |
| 306 | 3348 | <a href="#">NEOS13_0300</a>   | peg | 3348_72790_73371 | 72790 | 73371 | + | hypothetical protein                                                                                                                   |                     |
| 307 | 3348 | <a href="#">NEOS13_0301</a>   | peg | 3348_74761_73871 | 74761 | 73871 | - | hypothetical protein                                                                                                                   |                     |
| 308 | 3348 | <a href="#">NEOS13_0302</a>   | peg | 3348_75116_76582 | 75116 | 76582 | + | hypothetical protein                                                                                                                   |                     |
| 309 | 3350 | <a href="#">NEOS13_0303</a>   | peg | 3350_1797_799    | 1797  | 799   | - | hypothetical protein                                                                                                                   |                     |
| 310 | 3350 | <a href="#">NEOS13_0304</a>   | peg | 3350_4206_1822   | 4206  | 1822  | - | Phenylalanyl-tRNA synthetase beta chain (EC 6.1.1.20)                                                                                  |                     |
| 311 | 3350 | <a href="#">NEOS13_0305</a>   | peg | 3350_4874_4662   | 4874  | 4662  | - | hypothetical protein                                                                                                                   |                     |
| 312 | 3350 | <a href="#">NEOS13_0306</a>   | peg | 3350_5151_4945   | 5151  | 4945  | - | hypothetical protein                                                                                                                   |                     |
| 313 | 3350 | <a href="#">NEOS13_0307</a>   | peg | 3350_5296_5412   | 5296  | 5412  | + | hypothetical protein                                                                                                                   |                     |
| 314 | 3350 | <a href="#">NEOS13_0308</a>   | peg | 3350_6629_6441   | 6629  | 6441  | - | hypothetical protein                                                                                                                   |                     |
| 315 | 3351 | <a href="#">NEOS13_0309</a>   | peg | 3351_256_1890    | 256   | 1890  | + | hypothetical protein                                                                                                                   |                     |
| 316 | 3351 | <a href="#">NEOS13_0310</a>   | peg | 3351_3032_1959   | 3032  | 1959  | - | Putative ATP:guanido phosphotransferase YacI (EC 2.7.3.-)                                                                              |                     |
| 317 | 3351 | <a href="#">NEOS13_0311</a>   | peg | 3351_3579_3019   | 3579  | 3019  | - | FIG00493978: hypothetical protein                                                                                                      |                     |
| 318 | 3351 | <a href="#">NEOS13_0007ma</a> | rna | 3351_4221_4149   | 4221  | 4149  | - | tRNA-Lys-TTT                                                                                                                           | RNA                 |
| 319 | 3351 | <a href="#">NEOS13_0008ma</a> | rna | 3351_4303_4229   | 4303  | 4229  | - | tRNA-Glu-TTC                                                                                                                           | RNA                 |
| 320 | 3351 | <a href="#">NEOS13_0312</a>   | peg | 3351_4956_4405   | 4956  | 4405  | - | Ribosome recycling factor                                                                                                              |                     |
| 321 | 3351 | <a href="#">NEOS13_0313</a>   | peg | 3351_5777_5007   | 5777  | 5007  | - | Uridylate kinase (EC 2.7.4.-)                                                                                                          |                     |
| 322 | 3351 | <a href="#">NEOS13_0314</a>   | peg | 3351_6476_6003   | 6476  | 6003  | - | hypothetical protein                                                                                                                   |                     |
| 323 | 3351 | <a href="#">NEOS13_0315</a>   | peg | 3351_7532_6486   | 7532  | 6486  | - | hypothetical protein                                                                                                                   |                     |
| 324 | 3351 | <a href="#">NEOS13_0316</a>   | peg | 3351_8683_7754   | 8683  | 7754  | - | Permease of the drug/metabolite transporter (DMT) superfamily                                                                          |                     |
| 325 | 3351 | <a href="#">NEOS13_0317</a>   | peg | 3351_12055_8816  | 12055 | 8816  | - | hypothetical protein                                                                                                                   |                     |
| 326 | 3351 | <a href="#">NEOS13_0318</a>   | peg | 3351_12214_12909 | 12214 | 12909 | + | Phosphate regulon transcriptional regulatory protein PhoB (SphR)                                                                       |                     |
| 327 | 3351 | <a href="#">NEOS13_0319</a>   | peg | 3351_12977_13222 | 12977 | 13222 | + | hypothetical protein                                                                                                                   |                     |
| 328 | 3351 | <a href="#">NEOS13_0320</a>   | peg | 3351_13206_13349 | 13206 | 13349 | + | hypothetical protein                                                                                                                   |                     |
| 329 | 3351 | <a href="#">NEOS13_0321</a>   | peg | 3351_13703_13843 | 13703 | 13843 | + | hypothetical protein                                                                                                                   |                     |
| 330 | 3351 | <a href="#">NEOS13_0322</a>   | peg | 3351_14309_16063 | 14309 | 16063 | + | Leucine-rich repeat containing protein                                                                                                 | Leucine-rich repeat |
| 331 | 3351 | <a href="#">NEOS13_0323</a>   | peg | 3351_16232_16089 | 16232 | 16089 | - | hypothetical protein                                                                                                                   |                     |
| 332 | 3351 | <a href="#">NEOS13_0324</a>   | peg | 3351_17740_16343 | 17740 | 16343 | - | Fibronectin/fibrinogen-binding protein                                                                                                 |                     |
| 333 | 3351 | <a href="#">NEOS13_0325</a>   | peg | 3351_18925_17744 | 18925 | 17744 | - | S-adenosylmethionine synthetase (EC 2.5.1.6)                                                                                           |                     |
| 334 | 3351 | <a href="#">NEOS13_0326</a>   | peg | 3351_19956_19141 | 19956 | 19141 | - | Glutamate racemase (EC 5.1.1.3)                                                                                                        |                     |
| 335 | 3351 | <a href="#">NEOS13_0327</a>   | peg | 3351_20510_19953 | 20510 | 19953 | - | hypothetical protein                                                                                                                   |                     |
| 336 | 3351 | <a href="#">NEOS13_0328</a>   | peg | 3351_21403_20675 | 21403 | 20675 | - | Outer membrane lipoprotein omp16 precursor                                                                                             |                     |
| 337 | 3351 | <a href="#">NEOS13_0329</a>   | peg | 3351_23180_21804 | 23180 | 21804 | - | tolB protein precursor, periplasmic protein involved in the tonB-independent uptake of group A colicins                                |                     |
| 338 | 3351 | <a href="#">NEOS13_0330</a>   | peg | 3351_24205_23177 | 24205 | 23177 | - | putative tolA protein of Tol-Pal system                                                                                                |                     |
| 339 | 3351 | <a href="#">NEOS13_0331</a>   | peg | 3351_24722_24291 | 24722 | 24291 | - | Biopolymer transport protein ExbD/TolR                                                                                                 |                     |
| 340 | 3351 | <a href="#">NEOS13_0332</a>   | peg | 3351_25468_24719 | 25468 | 24719 | - | MotA/TolQ/ExbB proton channel family protein                                                                                           |                     |
| 341 | 3351 | <a href="#">NEOS13_0333</a>   | peg | 3351_25564_27774 | 25564 | 27774 | + | Cytochrome c-type biogenesis protein DsbD, protein-disulfide reductase (EC 1.8.1.8)                                                    |                     |
| 342 | 3351 | <a href="#">NEOS13_0334</a>   | peg | 3351_28281_29441 | 28281 | 29441 | + | Leucine-rich repeat containing protein                                                                                                 | Leucine-rich repeat |
| 343 | 3351 | <a href="#">NEOS13_0335</a>   | peg | 3351_29727_29960 | 29727 | 29960 | + | hypothetical protein                                                                                                                   |                     |
| 344 | 3351 | <a href="#">NEOS13_0336</a>   | peg | 3351_30061_30189 | 30061 | 30189 | + | hypothetical protein                                                                                                                   |                     |
| 345 | 3351 | <a href="#">NEOS13_0337</a>   | peg | 3351_30289_30423 | 30289 | 30423 | + | hypothetical protein                                                                                                                   |                     |
| 346 | 3351 | <a href="#">NEOS13_0338</a>   | peg | 3351_33166_30500 | 33166 | 30500 | - | hypothetical protein                                                                                                                   |                     |



|     |      |                             |     |                  |       |       |   |                                                                                                           |                     |
|-----|------|-----------------------------|-----|------------------|-------|-------|---|-----------------------------------------------------------------------------------------------------------|---------------------|
| 347 | 3351 | <a href="#">NEOS13_0339</a> | peg | 3351_33429_34622 | 33429 | 34622 | + | Heavy metal RND efflux outer membrane protein, CzcC family                                                |                     |
| 348 | 3351 | <a href="#">NEOS13_0340</a> | peg | 3351_34647_35783 | 34647 | 35783 | + | hypothetical protein                                                                                      |                     |
| 349 | 3351 | <a href="#">NEOS13_0341</a> | peg | 3351_35776_38997 | 35776 | 38997 | + | Cobalt-zinc-cadmium resistance protein CzcA; Cation efflux system protein CusA                            |                     |
| 350 | 3351 | <a href="#">NEOS13_0342</a> | peg | 3351_39577_41184 | 39577 | 41184 | + | hypothetical protein                                                                                      |                     |
| 351 | 3351 | <a href="#">NEOS13_0343</a> | peg | 3351_42519_41488 | 42519 | 41488 | - | Ferrocyclase, protoheme ferro-lyase (EC 4.99.1.1)                                                         |                     |
| 352 | 3351 | <a href="#">NEOS13_0344</a> | peg | 3351_42719_42522 | 42719 | 42522 | - | hypothetical protein                                                                                      |                     |
| 353 | 3351 | <a href="#">NEOS13_0345</a> | peg | 3351_44355_42706 | 44355 | 42706 | - | Outer membrane protein romA                                                                               |                     |
| 354 | 3351 | <a href="#">NEOS13_0346</a> | peg | 3351_44978_44367 | 44978 | 44367 | - | Phosphoserine phosphatase (EC 3.1.3.3)                                                                    |                     |
| 355 | 3351 | <a href="#">NEOS13_0347</a> | peg | 3351_45068_46030 | 45068 | 46030 | + | probable UDP-glucuronat epimerase                                                                         |                     |
| 356 | 3351 | <a href="#">NEOS13_0348</a> | peg | 3351_46176_46796 | 46176 | 46796 | + | hypothetical protein                                                                                      |                     |
| 357 | 3351 | <a href="#">NEOS13_0349</a> | peg | 3351_46898_48772 | 46898 | 48772 | + | hypothetical protein                                                                                      |                     |
| 358 | 3351 | <a href="#">NEOS13_0350</a> | peg | 3351_49853_49089 | 49853 | 49089 | - | protein of unknown function DUF152                                                                        |                     |
| 359 | 3351 | <a href="#">NEOS13_0351</a> | peg | 3351_50097_52277 | 50097 | 52277 | + | ATP-dependent DNA helicase UvrD/PerA                                                                      |                     |
| 360 | 3351 | <a href="#">NEOS13_0352</a> | peg | 3351_59243_52350 | 59243 | 52350 | - | hypothetical protein                                                                                      |                     |
| 361 | 3351 | <a href="#">NEOS13_0353</a> | peg | 3351_59449_59303 | 59449 | 59303 | - | hypothetical protein                                                                                      |                     |
| 362 | 3352 | <a href="#">NEOS13_0354</a> | peg | 3352_20_1213     | 20    | 1213  | + | Leucine-rich repeat containing protein                                                                    | Leucine-rich repeat |
| 363 | 3352 | <a href="#">NEOS13_0355</a> | peg | 3352_1665_1790   | 1665  | 1790  | + | hypothetical protein                                                                                      |                     |
| 364 | 3352 | <a href="#">NEOS13_0356</a> | peg | 3352_2088_2294   | 2088  | 2294  | + | Mobile element protein                                                                                    |                     |
| 365 | 3352 | <a href="#">NEOS13_0357</a> | peg | 3352_2563_2790   | 2563  | 2790  | + | Mobile element protein                                                                                    |                     |
| 366 | 3352 | <a href="#">NEOS13_0358</a> | peg | 3352_3960_2917   | 3960  | 2917  | - | hypothetical protein                                                                                      |                     |
| 367 | 3352 | <a href="#">NEOS13_0359</a> | peg | 3352_5281_4103   | 5281  | 4103  | - | hypothetical protein                                                                                      |                     |
| 368 | 3352 | <a href="#">NEOS13_0360</a> | peg | 3352_5933_6076   | 5933  | 6076  | + | hypothetical protein                                                                                      |                     |
| 369 | 3352 | <a href="#">NEOS13_0361</a> | peg | 3352_6079_6258   | 6079  | 6258  | + | hypothetical protein                                                                                      |                     |
| 370 | 3352 | <a href="#">NEOS13_0362</a> | peg | 3352_6617_6928   | 6617  | 6928  | + | transposase, IS4 family protein                                                                           | Transposase         |
| 371 | 3352 | <a href="#">NEOS13_0363</a> | peg | 3352_6969_7121   | 6969  | 7121  | + | hypothetical protein                                                                                      |                     |
| 372 | 3352 | <a href="#">NEOS13_0364</a> | peg | 3352_9404_7839   | 9404  | 7839  | - | FIG047302: Type III secretion S/T Protein Kinase                                                          | T3SA3               |
| 373 | 3352 | <a href="#">NEOS13_0365</a> | peg | 3352_10811_9489  | 10811 | 9489  | - | Flagellar motor switch protein Flin                                                                       | T3SA3               |
| 374 | 3352 | <a href="#">NEOS13_0366</a> | peg | 3352_12141_11167 | 12141 | 11167 | - | hypothetical protein                                                                                      | T3SA3               |
| 375 | 3352 | <a href="#">NEOS13_0367</a> | peg | 3352_12685_12197 | 12685 | 12197 | - | FIG016940: Type III secretion protein                                                                     | T3SA3               |
| 376 | 3352 | <a href="#">NEOS13_0368</a> | peg | 3352_14041_12725 | 14041 | 12725 | - | Type III secretion cytoplasmic ATP synthase (EC 3.6.3.14, YscN_SpaL_MxiB_HrcN_EscN)                       | T3SA3               |
| 377 | 3352 | <a href="#">NEOS13_0369</a> | peg | 3352_14821_14141 | 14821 | 14141 | - | hypothetical protein                                                                                      | T3SA3               |
| 378 | 3352 | <a href="#">NEOS13_0370</a> | peg | 3352_15363_14890 | 15363 | 14890 | - | FIG016921: Type III secretion protein                                                                     | T3SA3               |
| 379 | 3352 | <a href="#">NEOS13_0371</a> | peg | 3352_15779_15486 | 15779 | 15486 | - | unknown protein                                                                                           | T3SA3               |
| 380 | 3352 | <a href="#">NEOS13_0372</a> | peg | 3352_16229_15990 | 16229 | 15990 | - | FIG016943: Type III secretion                                                                             | T3SA3               |
| 381 | 3352 | <a href="#">NEOS13_0373</a> | peg | 3352_18768_16351 | 18768 | 16351 | - | FIG016943: Forkhead domain protein                                                                        | T3SA3               |
| 382 | 3352 | <a href="#">NEOS13_0374</a> | peg | 3352_19205_18813 | 19205 | 18813 | - | hypothetical protein                                                                                      | T3SA3               |
| 383 | 3353 | <a href="#">NEOS13_0375</a> | peg | 3353_210_326     | 210   | 326   | + | hypothetical protein                                                                                      |                     |
| 384 | 3353 | <a href="#">NEOS13_0376</a> | peg | 3353_486_854     | 486   | 854   | + | hypothetical protein                                                                                      |                     |
| 385 | 3353 | <a href="#">NEOS13_0377</a> | peg | 3353_899_1018    | 899   | 1018  | + | hypothetical protein                                                                                      |                     |
| 386 | 3353 | <a href="#">NEOS13_0378</a> | peg | 3353_1148_1336   | 1148  | 1336  | + | hypothetical protein                                                                                      |                     |
| 387 | 3353 | <a href="#">NEOS13_0379</a> | peg | 3353_1958_1833   | 1958  | 1833  | - | hypothetical protein                                                                                      |                     |
| 388 | 3353 | <a href="#">NEOS13_0380</a> | peg | 3353_2488_4377   | 2488  | 4377  | + | Acetyl-coenzyme A synthetase (EC 6.2.1.1)                                                                 |                     |
| 389 | 3353 | <a href="#">NEOS13_0381</a> | peg | 3353_4882_4436   | 4882  | 4436  | - | hypothetical protein                                                                                      |                     |
| 390 | 3353 | <a href="#">NEOS13_0382</a> | peg | 3353_5488_4886   | 5488  | 4886  | - | hypothetical protein                                                                                      |                     |
| 391 | 3353 | <a href="#">NEOS13_0383</a> | peg | 3353_5925_5491   | 5925  | 5491  | - | hypothetical protein                                                                                      |                     |
| 392 | 3353 | <a href="#">NEOS13_0384</a> | peg | 3353_6507_5998   | 6507  | 5998  | - | hypothetical protein                                                                                      |                     |
| 393 | 3353 | <a href="#">NEOS13_0385</a> | peg | 3353_7713_6643   | 7713  | 6643  | - | protein of unknown function UPF0118                                                                       |                     |
| 394 | 3353 | <a href="#">NEOS13_0386</a> | peg | 3353_7937_7815   | 7937  | 7815  | - | hypothetical protein                                                                                      |                     |
| 395 | 3353 | <a href="#">NEOS13_0387</a> | peg | 3353_9274_8129   | 9274  | 8129  | - | LSU m5C1962 methyltransferase Rlml                                                                        |                     |
| 396 | 3353 | <a href="#">NEOS13_0388</a> | peg | 3353_9650_9321   | 9650  | 9321  | - | COG2363                                                                                                   |                     |
| 397 | 3353 | <a href="#">NEOS13_0389</a> | peg | 3353_11601_10210 | 11601 | 10210 | - | Dihydrolipoamide dehydrogenase of 2-oxoglutarate dehydrogenase (EC 1.8.1.4)                               | TCA                 |
| 398 | 3353 | <a href="#">NEOS13_0390</a> | peg | 3353_11642_11767 | 11642 | 11767 | + | hypothetical protein                                                                                      |                     |
| 399 | 3353 | <a href="#">NEOS13_0391</a> | peg | 3353_12978_11845 | 12978 | 11845 | - | Dihydrolipoamide succinyltransferase component (E2) of 2-oxoglutarate dehydrogenase complex (EC 2.3.1.61) | TCA                 |
| 400 | 3353 | <a href="#">NEOS13_0392</a> | peg | 3353_13718_13557 | 13718 | 13557 | - | hypothetical protein                                                                                      |                     |
| 401 | 3353 | <a href="#">NEOS13_0393</a> | peg | 3353_15092_14247 | 15092 | 14247 | - | Leucine-rich repeat containing protein                                                                    | Leucine-rich repeat |
| 402 | 3353 | <a href="#">NEOS13_0394</a> | peg | 3353_15295_15140 | 15295 | 15140 | - | Leucine-rich repeat containing protein                                                                    | Leucine-rich repeat |
| 403 | 3353 | <a href="#">NEOS13_0395</a> | peg | 3353_15484_15344 | 15484 | 15344 | - | hypothetical protein                                                                                      |                     |
| 404 | 3353 | <a href="#">NEOS13_0396</a> | peg | 3353_17177_15486 | 17177 | 15486 | - | Leucine-rich repeat containing protein                                                                    | Leucine-rich repeat |
| 405 | 3353 | <a href="#">NEOS13_0397</a> | peg | 3353_17815_17531 | 17815 | 17531 | - | hypothetical protein                                                                                      |                     |
| 406 | 3358 | <a href="#">NEOS13_0398</a> | peg | 3358_541_164     | 541   | 164   | - | Mobile element protein                                                                                    |                     |
| 407 | 3358 | <a href="#">NEOS13_0399</a> | peg | 3358_1081_1821   | 1081  | 1821  | + | hypothetical protein                                                                                      |                     |
| 408 | 3358 | <a href="#">NEOS13_0400</a> | peg | 3358_1818_2666   | 1818  | 2666  | + | hypothetical protein                                                                                      |                     |
| 409 | 3358 | <a href="#">NEOS13_0401</a> | peg | 3358_2670_2795   | 2670  | 2795  | + | hypothetical protein                                                                                      |                     |
| 410 | 3358 | <a href="#">NEOS13_0402</a> | peg | 3358_2853_4922   | 2853  | 4922  | + | hypothetical protein                                                                                      |                     |
| 411 | 3358 | <a href="#">NEOS13_0403</a> | peg | 3358_4948_5862   | 4948  | 5862  | + | UDP-glucose 4-epimerase (EC 5.1.3.2)                                                                      |                     |
| 412 | 3358 | <a href="#">NEOS13_0404</a> | peg | 3358_6158_6547   | 6158  | 6547  | + | hypothetical protein                                                                                      |                     |
| 413 | 3358 | <a href="#">NEOS13_0405</a> | peg | 3358_6874_7710   | 6874  | 7710  | + | O-antigen export system, permease protein                                                                 | ABC_transporter     |
| 414 | 3358 | <a href="#">NEOS13_0406</a> | peg | 3358_7711_8529   | 7711  | 8529  | + | Teichoic acid export ATP-binding protein TagH (EC 3.6.3.40)                                               | ABC_transporter     |
| 415 | 3358 | <a href="#">NEOS13_0407</a> | peg | 3358_8530_9825   | 8530  | 9825  | + | hypothetical protein                                                                                      |                     |
| 416 | 3358 | <a href="#">NEOS13_0408</a> | peg | 3358_9809_10756  | 9809  | 10756 | + | Alpha-L-Rha alpha-1,3-L-rhamnosyltransferase (EC 2.4.1.-)                                                 |                     |
| 417 | 3358 | <a href="#">NEOS13_0409</a> | peg | 3358_10825_12099 | 10825 | 12099 | + | hypothetical protein                                                                                      |                     |

|     |      |                               |     |                  |       |       |   |                                                               |                     |
|-----|------|-------------------------------|-----|------------------|-------|-------|---|---------------------------------------------------------------|---------------------|
| 418 | 3358 | <a href="#">NEOS13_0410</a>   | peg | 3358_12092_13927 | 12092 | 13927 | + | glycosyl transferase, group 2 family protein                  |                     |
| 419 | 3358 | <a href="#">NEOS13_0411</a>   | peg | 3358_13958_15415 | 13958 | 15415 | + | Probable poly(beta-D-mannuronate) O-acetylase (EC 2.3.1.-)    |                     |
| 420 | 3358 | <a href="#">NEOS13_0412</a>   | peg | 3358_15417_16559 | 15417 | 16559 | + | hypothetical protein                                          |                     |
| 421 | 3358 | <a href="#">NEOS13_0413</a>   | peg | 3358_17684_16851 | 17684 | 16851 | - | hypothetical protein                                          |                     |
| 422 | 3358 | <a href="#">NEOS13_0414</a>   | peg | 3358_17813_18403 | 17813 | 18403 | + | Phosphoglycolate phosphatase (EC 3.1.3.18)                    |                     |
| 423 | 3358 | <a href="#">NEOS13_0415</a>   | peg | 3358_18435_18638 | 18435 | 18638 | + | hypothetical protein                                          |                     |
| 424 | 3358 | <a href="#">NEOS13_0416</a>   | peg | 3358_18836_18702 | 18836 | 18702 | - | hypothetical protein                                          |                     |
| 425 | 3358 | <a href="#">NEOS13_0417</a>   | peg | 3358_19539_21698 | 19539 | 21698 | + | hypothetical protein                                          |                     |
| 426 | 3358 | <a href="#">NEOS13_0418</a>   | peg | 3358_21711_21917 | 21711 | 21917 | + | hypothetical protein                                          |                     |
| 427 | 3358 | <a href="#">NEOS13_0419</a>   | peg | 3358_22192_21923 | 22192 | 21923 | - | hypothetical protein                                          |                     |
| 428 | 3358 | <a href="#">NEOS13_0420</a>   | peg | 3358_22879_22484 | 22879 | 22484 | - | Mobile element protein                                        |                     |
| 429 | 3358 | <a href="#">NEOS13_0421</a>   | peg | 3358_23450_23322 | 23450 | 23322 | - | hypothetical protein                                          |                     |
| 430 | 3358 | <a href="#">NEOS13_0422</a>   | peg | 3358_23445_25205 | 23445 | 25205 | + | Leucine-rich repeat containing protein                        | Leucine-rich repeat |
| 431 | 3359 | <a href="#">NEOS13_0423</a>   | peg | 3359_1375_302    | 1375  | 302   | - | Leucine-rich repeat containing protein                        | Leucine-rich repeat |
| 432 | 3360 | <a href="#">NEOS13_0424</a>   | peg | 3360_1050_349    | 1050  | 349   | - | hypothetical protein                                          |                     |
| 433 | 3360 | <a href="#">NEOS13_0425</a>   | peg | 3360_2592_1126   | 2592  | 1126  | - | Mg/Co/Ni transporter MgtE / CBS domain                        |                     |
| 434 | 3360 | <a href="#">NEOS13_0426</a>   | peg | 3360_2784_4586   | 2784  | 4586  | + | GTP-binding protein TypA/BipA                                 |                     |
| 435 | 3360 | <a href="#">NEOS13_0427</a>   | peg | 3360_4856_4731   | 4856  | 4731  | - | hypothetical protein                                          |                     |
| 436 | 3360 | <a href="#">NEOS13_0428</a>   | peg | 3360_5087_4938   | 5087  | 4938  | - | hypothetical protein                                          |                     |
| 437 | 3360 | <a href="#">NEOS13_0429</a>   | peg | 3360_6270_5629   | 6270  | 5629  | - | FIG006285: hypothetical protein                               |                     |
| 438 | 3360 | <a href="#">NEOS13_0430</a>   | peg | 3360_8678_6267   | 8678  | 6267  | - | FIG003033: Helicase domain protein                            |                     |
| 439 | 3360 | <a href="#">NEOS13_0431</a>   | peg | 3360_10260_8668  | 10260 | 8668  | - | ATP-dependent DNA ligase (EC 6.5.1.1) LigC                    |                     |
| 440 | 3360 | <a href="#">NEOS13_0432</a>   | peg | 3360_11183_10257 | 11183 | 10257 | - | mRNA 3-end processing factor                                  |                     |
| 441 | 3360 | <a href="#">NEOS13_0433</a>   | peg | 3360_11291_11410 | 11291 | 11410 | + | hypothetical protein                                          |                     |
| 442 | 3360 | <a href="#">NEOS13_0434</a>   | peg | 3360_13650_11566 | 13650 | 11566 | - | hypothetical protein                                          |                     |
| 443 | 3360 | <a href="#">NEOS13_0435</a>   | peg | 3360_16952_14934 | 16952 | 14934 | - | ankyrin repeat protein                                        | Ankyrin             |
| 444 | 3360 | <a href="#">NEOS13_0436</a>   | peg | 3360_18167_18313 | 18167 | 18313 | + | hypothetical protein                                          |                     |
| 445 | 3360 | <a href="#">NEOS13_0437</a>   | peg | 3360_18403_18660 | 18403 | 18660 | + | Mobile element protein                                        |                     |
| 446 | 3360 | <a href="#">NEOS13_0438</a>   | peg | 3360_19418_18681 | 19418 | 18681 | - | Mobile element protein                                        |                     |
| 447 | 3360 | <a href="#">NEOS13_0439</a>   | peg | 3360_19579_19415 | 19579 | 19415 | - | hypothetical protein                                          |                     |
| 448 | 3360 | <a href="#">NEOS13_0440</a>   | peg | 3360_19934_19605 | 19934 | 19605 | - | IS1478 transposase                                            | Transposase         |
| 449 | 3360 | <a href="#">NEOS13_0441</a>   | peg | 3360_20831_20538 | 20831 | 20538 | - | hypothetical protein                                          |                     |
| 450 | 3360 | <a href="#">NEOS13_0442</a>   | peg | 3360_20877_20996 | 20877 | 20996 | + | hypothetical protein                                          |                     |
| 451 | 3360 | <a href="#">NEOS13_0443</a>   | peg | 3360_22372_20993 | 22372 | 20993 | - | putative zinc protease                                        |                     |
| 452 | 3360 | <a href="#">NEOS13_0009ma</a> | rna | 3360_22534_22615 | 22534 | 22615 | + | tRNA-Leu-TAG                                                  | RNA                 |
| 453 | 3360 | <a href="#">NEOS13_0444</a>   | peg | 3360_22782_22648 | 22782 | 22648 | - | hypothetical protein                                          |                     |
| 454 | 3360 | <a href="#">NEOS13_0445</a>   | peg | 3360_23168_22974 | 23168 | 22974 | - | hypothetical protein                                          |                     |
| 455 | 3361 | <a href="#">NEOS13_0446</a>   | peg | 3361_82_1269     | 82    | 1269  | + | Leucine-rich repeat containing protein                        | Leucine-rich repeat |
| 456 | 3361 | <a href="#">NEOS13_0447</a>   | peg | 3361_1681_1517   | 1681  | 1517  | - | hypothetical protein                                          |                     |
| 457 | 3361 | <a href="#">NEOS13_0448</a>   | peg | 3361_1814_1674   | 1814  | 1674  | - | Mobile element protein                                        |                     |
| 458 | 3361 | <a href="#">NEOS13_0449</a>   | peg | 3361_2006_1875   | 2006  | 1875  | - | hypothetical protein                                          |                     |
| 459 | 3361 | <a href="#">NEOS13_0450</a>   | peg | 3361_2151_1981   | 2151  | 1981  | - | Mobile element protein                                        |                     |
| 460 | 3361 | <a href="#">NEOS13_0451</a>   | peg | 3361_2449_2255   | 2449  | 2255  | - | Mobile element protein                                        |                     |
| 461 | 3361 | <a href="#">NEOS13_0452</a>   | peg | 3361_3144_3287   | 3144  | 3287  | + | hypothetical protein                                          |                     |
| 462 | 3361 | <a href="#">NEOS13_0453</a>   | peg | 3361_3284_4294   | 3284  | 4294  | + | hypothetical protein                                          |                     |
| 463 | 3361 | <a href="#">NEOS13_0454</a>   | peg | 3361_4816_6045   | 4816  | 6045  | + | hypothetical protein                                          |                     |
| 464 | 3361 | <a href="#">NEOS13_0455</a>   | peg | 3361_6566_6396   | 6566  | 6396  | - | hypothetical protein                                          |                     |
| 465 | 3361 | <a href="#">NEOS13_0456</a>   | peg | 3361_6852_6643   | 6852  | 6643  | - | hypothetical protein                                          |                     |
| 466 | 3361 | <a href="#">NEOS13_0457</a>   | peg | 3361_6923_7036   | 6923  | 7036  | + | hypothetical protein                                          |                     |
| 467 | 3361 | <a href="#">NEOS13_0458</a>   | peg | 3361_7619_7287   | 7619  | 7287  | - | hypothetical protein                                          |                     |
| 468 | 3361 | <a href="#">NEOS13_0459</a>   | peg | 3361_7753_7878   | 7753  | 7878  | + | hypothetical protein                                          |                     |
| 469 | 3361 | <a href="#">NEOS13_0460</a>   | peg | 3361_8932_7946   | 8932  | 7946  | - | putative tyrosine/tryptophan transport protein                |                     |
| 470 | 3361 | <a href="#">NEOS13_0461</a>   | peg | 3361_8922_9155   | 8922  | 9155  | + | hypothetical protein                                          |                     |
| 471 | 3361 | <a href="#">NEOS13_0462</a>   | peg | 3361_9438_10355  | 9438  | 10355 | + | hypothetical protein                                          |                     |
| 472 | 3361 | <a href="#">NEOS13_0463</a>   | peg | 3361_10549_11643 | 10549 | 11643 | + | hypothetical protein                                          |                     |
| 473 | 3361 | <a href="#">NEOS13_0464</a>   | peg | 3361_11667_14630 | 11667 | 14630 | + | putative Tyrosine-protein kinase                              |                     |
| 474 | 3361 | <a href="#">NEOS13_0465</a>   | peg | 3361_15679_14852 | 15679 | 14852 | - | NADPH dependent preQ0 reductase (EC 1.7.1.13)                 |                     |
| 475 | 3361 | <a href="#">NEOS13_0466</a>   | peg | 3361_19752_16360 | 19752 | 16360 | - | Penicillin-binding protein PBP2                               |                     |
| 476 | 3361 | <a href="#">NEOS13_0010ma</a> | rna | 3361_19880_19950 | 19880 | 19950 | + | tRNA-Gly-TCC                                                  | RNA                 |
| 477 | 3361 | <a href="#">NEOS13_0467</a>   | peg | 3361_20124_20846 | 20124 | 20846 | + | SSU ribosomal protein S2p (SAe)                               |                     |
| 478 | 3361 | <a href="#">NEOS13_0468</a>   | peg | 3361_20850_21704 | 20850 | 21704 | + | Translation elongation factor Ts                              |                     |
| 479 | 3361 | <a href="#">NEOS13_0469</a>   | peg | 3361_21867_22742 | 21867 | 22742 | + | Permease of the drug/metabolite transporter (DMT) superfamily |                     |
| 480 | 3361 | <a href="#">NEOS13_0470</a>   | peg | 3361_23664_22921 | 23664 | 22921 | - | hypothetical protein                                          |                     |
| 481 | 3361 | <a href="#">NEOS13_0471</a>   | peg | 3361_25170_23728 | 25170 | 23728 | - | hypothetical protein                                          |                     |
| 482 | 3362 | <a href="#">NEOS13_0472</a>   | peg | 3362_88_219      | 88    | 219   | + | hypothetical protein                                          |                     |
| 483 | 3362 | <a href="#">NEOS13_0473</a>   | peg | 3362_784_1380    | 784   | 1380  | + | hypothetical protein                                          |                     |
| 484 | 3362 | <a href="#">NEOS13_0474</a>   | peg | 3362_1377_2009   | 1377  | 2009  | + | hypothetical protein                                          |                     |
| 485 | 3362 | <a href="#">NEOS13_0475</a>   | peg | 3362_2186_2013   | 2186  | 2013  | - | hypothetical protein                                          |                     |
| 486 | 3363 | <a href="#">NEOS13_0476</a>   | peg | 3363_226_59      | 226   | 59    | - | hypothetical protein                                          |                     |
| 487 | 3363 | <a href="#">NEOS13_0477</a>   | peg | 3363_710_570     | 710   | 570   | - | hypothetical protein                                          |                     |
| 488 | 3363 | <a href="#">NEOS13_0478</a>   | peg | 3363_1278_2942   | 1278  | 2942  | + | Lipoprotein releasing system transmembrane protein LoLE       | ABC_transporter     |
| 489 | 3363 | <a href="#">NEOS13_0479</a>   | peg | 3363_2944_3636   | 2944  | 3636  | + | Lipoprotein releasing system ATP-binding protein LoLD         | ABC_transporter     |
| 490 | 3363 | <a href="#">NEOS13_0480</a>   | peg | 3363_3858_3983   | 3858  | 3983  | + | hypothetical protein                                          |                     |
| 491 | 3363 | <a href="#">NEOS13_0481</a>   | peg | 3363_4032_4184   | 4032  | 4184  | + | hypothetical protein                                          |                     |
| 492 | 3364 | <a href="#">NEOS13_0482</a>   | peg | 3364_15_1199     | 15    | 1199  | + | Leucine-rich repeat containing protein                        | Leucine-rich repeat |
| 493 | 3365 | <a href="#">NEOS13_0483</a>   | peg | 3365_585_746     | 585   | 746   | + | hypothetical protein                                          |                     |

|     |      |                               |     |                  |       |       |   |                                                                               |                        |
|-----|------|-------------------------------|-----|------------------|-------|-------|---|-------------------------------------------------------------------------------|------------------------|
| 494 | 3366 | <a href="#">NEOS13_0484</a>   | peg | 3366_265_540     | 265   | 540   | + | hypothetical protein                                                          |                        |
| 495 | 3366 | <a href="#">NEOS13_0485</a>   | peg | 3366_2037_850    | 2037  | 850   | - | Leucine-rich repeat containing protein                                        | Leucine-rich repeat    |
| 496 | 3367 | <a href="#">NEOS13_0011ma</a> | rna | 3367_1608_70     | 1608  | 70    | - | Small Subunit Ribosomal RNA; ssuRNA; SSU rRNA                                 | RNA                    |
| 497 | 3367 | <a href="#">NEOS13_0486</a>   | peg | 3367_5660_3537   | 5660  | 3537  | - | Adenosine deaminase (EC 3.5.4.4)                                              |                        |
| 498 | 3367 | <a href="#">NEOS13_0487</a>   | peg | 3367_7828_5849   | 7828  | 5849  | - | Pyrophosphate-energized proton pump (EC 3.6.1.1)                              |                        |
| 499 | 3367 | <a href="#">NEOS13_0488</a>   | peg | 3367_7962_8078   | 7962  | 8078  | + | hypothetical protein                                                          |                        |
| 500 | 3367 | <a href="#">NEOS13_0489</a>   | peg | 3367_9319_8036   | 9319  | 8036  | - | Error-prone, lesion bypass DNA polymerase V (UmuC)                            |                        |
| 501 | 3367 | <a href="#">NEOS13_0490</a>   | peg | 3367_10256_10131 | 10256 | 10131 | - | hypothetical protein                                                          |                        |
| 502 | 3367 | <a href="#">NEOS13_0491</a>   | peg | 3367_10580_12385 | 10580 | 12385 | + | COG0488: ATPase components of ABC transporters with duplicated ATPase domains | ABC_transporter        |
| 503 | 3367 | <a href="#">NEOS13_0492</a>   | peg | 3367_13178_12837 | 13178 | 12837 | - | membrane protein of unknown function                                          |                        |
| 504 | 3367 | <a href="#">NEOS13_0493</a>   | peg | 3367_13868_13746 | 13868 | 13746 | - | Mobile element protein                                                        |                        |
| 505 | 3367 | <a href="#">NEOS13_0494</a>   | peg | 3367_14067_13936 | 14067 | 13936 | - | hypothetical protein                                                          |                        |
| 506 | 3367 | <a href="#">NEOS13_0495</a>   | peg | 3367_15520_14495 | 15520 | 14495 | - | Leucine-rich repeat containing protein                                        | Leucine-rich repeat    |
| 507 | 3368 | <a href="#">NEOS13_0496</a>   | peg | 3368_49_186      | 49    | 186   | + | hypothetical protein                                                          |                        |
| 508 | 3369 | <a href="#">NEOS13_0497</a>   | peg | 3369_107_1165    | 107   | 1165  | + | Leucine-rich repeat containing protein                                        | Leucine-rich repeat    |
| 509 | 3369 | <a href="#">NEOS13_0498</a>   | peg | 3369_2040_3353   | 2040  | 3353  | + | Leucine-rich repeat containing protein                                        | Leucine-rich repeat    |
| 510 | 3372 | <a href="#">NEOS13_0499</a>   | peg | 3372_22_168      | 22    | 168   | + | hypothetical protein                                                          |                        |
| 511 | 3372 | <a href="#">NEOS13_0500</a>   | peg | 3372_380_126     | 380   | 126   | - | Mobile element protein                                                        |                        |
| 512 | 3372 | <a href="#">NEOS13_0501</a>   | peg | 3372_636_869     | 636   | 869   | + | hypothetical protein                                                          |                        |
| 513 | 3372 | <a href="#">NEOS13_0502</a>   | peg | 3372_1120_920    | 1120  | 920   | - | hypothetical protein                                                          |                        |
| 514 | 3372 | <a href="#">NEOS13_0503</a>   | peg | 3372_1242_1379   | 1242  | 1379  | + | hypothetical protein                                                          |                        |
| 515 | 3372 | <a href="#">NEOS13_0504</a>   | peg | 3372_1475_2548   | 1475  | 2548  | + | hypothetical protein                                                          |                        |
| 516 | 3372 | <a href="#">NEOS13_0505</a>   | peg | 3372_2703_3974   | 2703  | 3974  | + | hypothetical protein                                                          |                        |
| 517 | 3372 | <a href="#">NEOS13_0506</a>   | peg | 3372_4011_4703   | 4011  | 4703  | + | hypothetical protein                                                          |                        |
| 518 | 3372 | <a href="#">NEOS13_0507</a>   | peg | 3372_5067_4927   | 5067  | 4927  | - | hypothetical protein                                                          |                        |
| 519 | 3373 | <a href="#">NEOS13_0508</a>   | peg | 3373_1734_961    | 1734  | 961   | - | Leucine-rich repeat containing protein                                        | Leucine-rich repeat    |
| 520 | 3374 | <a href="#">NEOS13_0509</a>   | peg | 3374_29_1651     | 29    | 1651  | + | Leucine-rich repeat containing protein                                        | Leucine-rich repeat    |
| 521 | 3374 | <a href="#">NEOS13_0510</a>   | peg | 3374_1887_1672   | 1887  | 1672  | - | Mobile element protein                                                        |                        |
| 522 | 3374 | <a href="#">NEOS13_0511</a>   | peg | 3374_2605_2483   | 2605  | 2483  | - | hypothetical protein                                                          |                        |
| 523 | 3374 | <a href="#">NEOS13_0512</a>   | peg | 3374_3050_2931   | 3050  | 2931  | - | hypothetical protein                                                          |                        |
| 524 | 3374 | <a href="#">NEOS13_0513</a>   | peg | 3374_4094_3507   | 4094  | 3507  | - | hypothetical protein                                                          | Outer membrane protein |
| 525 | 3374 | <a href="#">NEOS13_0514</a>   | peg | 3374_6012_4087   | 6012  | 4087  | - | internalin, putative                                                          |                        |
| 526 | 3374 | <a href="#">NEOS13_0515</a>   | peg | 3374_6278_6439   | 6278  | 6439  | + | hypothetical protein                                                          |                        |
| 527 | 3375 | <a href="#">NEOS13_0516</a>   | peg | 3375_118_1035    | 118   | 1035  | + | Leucine-rich repeat containing protein                                        | Leucine-rich repeat    |
| 528 | 3376 | <a href="#">NEOS13_0517</a>   | peg | 3376_57_272      | 57    | 272   | + | hypothetical protein                                                          |                        |
| 529 | 3376 | <a href="#">NEOS13_0518</a>   | peg | 3376_1377_604    | 1377  | 604   | - | Leucine-rich repeat containing protein                                        | Leucine-rich repeat    |
| 530 | 3377 | <a href="#">NEOS13_0519</a>   | peg | 3377_427_233     | 427   | 233   | - | hypothetical protein                                                          |                        |
| 531 | 3377 | <a href="#">NEOS13_0520</a>   | peg | 3377_952_593     | 952   | 593   | - | Leucine-rich repeat containing protein                                        | Leucine-rich repeat    |
| 532 | 3378 | <a href="#">NEOS13_0521</a>   | peg | 3378_678_403     | 678   | 403   | - | hypothetical protein                                                          |                        |
| 533 | 3379 | <a href="#">NEOS13_0522</a>   | peg | 3379_747_541     | 747   | 541   | - | conserved hypothetical protein                                                |                        |
| 534 | 3379 | <a href="#">NEOS13_0523</a>   | peg | 3379_1055_747    | 1055  | 747   | - | conserved hypothetical protein                                                |                        |
| 535 | 3379 | <a href="#">NEOS13_0524</a>   | peg | 3379_1275_1117   | 1275  | 1117  | - | hypothetical protein                                                          |                        |
| 536 | 3379 | <a href="#">NEOS13_0525</a>   | peg | 3379_1529_1254   | 1529  | 1254  | - | hypothetical protein                                                          |                        |
| 537 | 3379 | <a href="#">NEOS13_0526</a>   | peg | 3379_1489_1617   | 1489  | 1617  | + | hypothetical protein                                                          |                        |
| 538 | 3379 | <a href="#">NEOS13_0527</a>   | peg | 3379_1851_1666   | 1851  | 1666  | - | hypothetical protein                                                          |                        |
| 539 | 3379 | <a href="#">NEOS13_0528</a>   | peg | 3379_1959_2078   | 1959  | 2078  | + | hypothetical protein                                                          |                        |
| 540 | 3380 | <a href="#">NEOS13_0529</a>   | peg | 3380_2699_324    | 2699  | 324   | - | hypothetical protein                                                          |                        |
| 541 | 3380 | <a href="#">NEOS13_0530</a>   | peg | 3380_3076_2909   | 3076  | 2909  | - | hypothetical protein                                                          |                        |
| 542 | 3381 | <a href="#">NEOS13_0531</a>   | peg | 3381_19_741      | 19    | 741   | + | hypothetical protein                                                          | Outer membrane protein |
| 543 | 3381 | <a href="#">NEOS13_0532</a>   | peg | 3381_1069_1185   | 1069  | 1185  | + | hypothetical protein                                                          |                        |
| 544 | 3381 | <a href="#">NEOS13_0533</a>   | peg | 3381_2203_1235   | 2203  | 1235  | - | Ribosomal large subunit pseudouridine synthase D (EC 4.2.1.70)                |                        |
| 545 | 3381 | <a href="#">NEOS13_0534</a>   | peg | 3381_2612_2268   | 2612  | 2268  | - | hypothetical protein                                                          |                        |
| 546 | 3381 | <a href="#">NEOS13_0535</a>   | peg | 3381_2837_2619   | 2837  | 2619  | - | hypothetical protein                                                          |                        |
| 547 | 3381 | <a href="#">NEOS13_0536</a>   | peg | 3381_2755_2949   | 2755  | 2949  | + | hypothetical protein                                                          |                        |
| 548 | 3381 | <a href="#">NEOS13_0537</a>   | peg | 3381_3358_3083   | 3358  | 3083  | - | hypothetical protein                                                          |                        |
| 549 | 3381 | <a href="#">NEOS13_0538</a>   | peg | 3381_4317_3709   | 4317  | 3709  | - | hypothetical protein                                                          |                        |
| 550 | 3381 | <a href="#">NEOS13_0539</a>   | peg | 3381_6215_4335   | 6215  | 4335  | - | Topoisomerase IV subunit A (EC 5.99.1.-)                                      |                        |
| 551 | 3381 | <a href="#">NEOS13_0540</a>   | peg | 3381_8220_6424   | 8220  | 6424  | - | Topoisomerase IV subunit B (EC 5.99.1.-)                                      |                        |
| 552 | 3381 | <a href="#">NEOS13_0541</a>   | peg | 3381_8394_9413   | 8394  | 9413  | + | UDP-N-acetylglucosamine 4,6-dehydratase (EC 4.2.1.-)                          |                        |
| 553 | 3381 | <a href="#">NEOS13_0542</a>   | peg | 3381_9468_10496  | 9468  | 10496 | + | Glutamyl-tRNA reductase (EC 1.2.1.70)                                         |                        |
| 554 | 3381 | <a href="#">NEOS13_0543</a>   | peg | 3381_10578_12170 | 10578 | 12170 | + | hypothetical protein                                                          |                        |
| 555 | 3381 | <a href="#">NEOS13_0544</a>   | peg | 3381_13359_12628 | 13359 | 12628 | - | putative lipote-protein ligase                                                |                        |
| 556 | 3381 | <a href="#">NEOS13_0545</a>   | peg | 3381_15211_13352 | 15211 | 13352 | - | tRNA uridine 5-carboxymethylaminomethyl modification enzyme GidA              |                        |
| 557 | 3381 | <a href="#">NEOS13_0546</a>   | peg | 3381_17207_15762 | 17207 | 15762 | - | Replicative DNA helicase (EC 3.6.1.-)                                         |                        |
| 558 | 3381 | <a href="#">NEOS13_0547</a>   | peg | 3381_17614_19098 | 17614 | 19098 | + | RNA polymerase sigma-54 factor RpoN                                           |                        |
| 559 | 3381 | <a href="#">NEOS13_0548</a>   | peg | 3381_19654_21324 | 19654 | 21324 | + | Sulfate permease                                                              |                        |
| 560 | 3381 | <a href="#">NEOS13_0549</a>   | peg | 3381_21919_21767 | 21919 | 21767 | - | Mobile element protein                                                        |                        |
| 561 | 3381 | <a href="#">NEOS13_0550</a>   | peg | 3381_22195_22317 | 22195 | 22317 | + | hypothetical protein                                                          |                        |
| 562 | 3381 | <a href="#">NEOS13_0551</a>   | peg | 3381_22498_22623 | 22498 | 22623 | + | hypothetical protein                                                          |                        |
| 563 | 3381 | <a href="#">NEOS13_0552</a>   | peg | 3381_22605_24203 | 22605 | 24203 | + | Leucine-rich repeat containing protein                                        | Leucine-rich repeat    |
| 564 | 3381 | <a href="#">NEOS13_0553</a>   | peg | 3381_24223_24366 | 24223 | 24366 | + | hypothetical protein                                                          |                        |
| 565 | 3383 | <a href="#">NEOS13_0554</a>   | peg | 3383_376_702     | 376   | 702   | + | hypothetical protein                                                          |                        |
| 566 | 3383 | <a href="#">NEOS13_0555</a>   | peg | 3383_965_1081    | 965   | 1081  | + | hypothetical protein                                                          |                        |
| 567 | 3385 | <a href="#">NEOS13_0556</a>   | peg | 3385_293_901     | 293   | 901   | + | hypothetical protein                                                          |                        |
| 568 | 3385 | <a href="#">NEOS13_0557</a>   | peg | 3385_1765_1631   | 1765  | 1631  | - | hypothetical protein                                                          |                        |



|     |      |                             |     |                  |       |       |   |                                                                                                                                    |                                  |
|-----|------|-----------------------------|-----|------------------|-------|-------|---|------------------------------------------------------------------------------------------------------------------------------------|----------------------------------|
| 569 | 3386 | <a href="#">NEOS13_0558</a> | peg | 3386_48_668      | 48    | 668   | + | Leucine-rich repeat containing protein                                                                                             | Leucine-rich repeat              |
| 570 | 3387 | <a href="#">NEOS13_0559</a> | peg | 3387_48_668      | 48    | 668   | + | Leucine-rich repeat containing protein                                                                                             | Leucine-rich repeat              |
| 571 | 3388 | <a href="#">NEOS13_0560</a> | peg | 3388_1723_1571   | 1723  | 1571  | - | Leucine-rich repeat containing protein                                                                                             | Leucine-rich repeat              |
| 572 | 3389 | <a href="#">NEOS13_0561</a> | peg | 3389_336_70      | 336   | 70    | - | hypothetical protein                                                                                                               |                                  |
| 573 | 3389 | <a href="#">NEOS13_0562</a> | peg | 3389_5416_413    | 5416  | 413   | - | hypothetical protein                                                                                                               |                                  |
| 574 | 3389 | <a href="#">NEOS13_0563</a> | peg | 3389_9581_5802   | 9581  | 5802  | - | hypothetical protein                                                                                                               |                                  |
| 575 | 3389 | <a href="#">NEOS13_0564</a> | peg | 3389_9861_9697   | 9861  | 9697  | - | hypothetical protein                                                                                                               |                                  |
| 576 | 3389 | <a href="#">NEOS13_0565</a> | peg | 3389_10058_11161 | 10058 | 11161 | + | UDP-N-acetylglucosamine--N-acetylmuramyl-(pentapeptide) pyrophosphoryl-undecaprenol N-acetylglucosamine transferase (EC 2.4.1.227) |                                  |
| 577 | 3389 | <a href="#">NEOS13_0566</a> | peg | 3389_11158_13593 | 11158 | 13593 | + | UDP-N-acetylmuramate--alanine ligase (EC 6.3.2.8)                                                                                  |                                  |
| 578 | 3389 | <a href="#">NEOS13_0567</a> | peg | 3389_13788_14690 | 13788 | 14690 | + | hypothetical protein                                                                                                               |                                  |
| 579 | 3389 | <a href="#">NEOS13_0568</a> | peg | 3389_14915_15193 | 14915 | 15193 | + | hypothetical protein                                                                                                               |                                  |
| 580 | 3389 | <a href="#">NEOS13_0569</a> | peg | 3389_15586_15705 | 15586 | 15705 | + | hypothetical protein                                                                                                               |                                  |
| 581 | 3389 | <a href="#">NEOS13_0570</a> | peg | 3389_16248_17279 | 16248 | 17279 | + | tRNA dimethylallyltransferase (EC 2.5.1.75)                                                                                        |                                  |
| 582 | 3389 | <a href="#">NEOS13_0571</a> | peg | 3389_17374_19095 | 17374 | 19095 | + | hypothetical protein                                                                                                               |                                  |
| 583 | 3389 | <a href="#">NEOS13_0572</a> | peg | 3389_19058_19732 | 19058 | 19732 | + | hypothetical protein                                                                                                               |                                  |
| 584 | 3389 | <a href="#">NEOS13_0573</a> | peg | 3389_20359_20994 | 20359 | 20994 | + | Nicotinate-nucleotide adenyltransferase (EC 2.7.7.18)                                                                              |                                  |
| 585 | 3389 | <a href="#">NEOS13_0574</a> | peg | 3389_21009_21374 | 21009 | 21374 | + | lojap protein                                                                                                                      |                                  |
| 586 | 3389 | <a href="#">NEOS13_0575</a> | peg | 3389_21392_22639 | 21392 | 22639 | + | 3-oxoacyl-[acyl-carrier-protein] synthase, KASII (EC 2.3.1.41)                                                                     | Fatty_acid_initiation_elongation |
| 587 | 3389 | <a href="#">NEOS13_0576</a> | peg | 3389_22639_23061 | 22639 | 23061 | + | putative dGTP pyrophosphohydrolase, mutI                                                                                           |                                  |
| 588 | 3389 | <a href="#">NEOS13_0577</a> | peg | 3389_23668_23411 | 23668 | 23411 | - | Antitoxin of toxin-antitoxin system Phd                                                                                            |                                  |
| 589 | 3389 | <a href="#">NEOS13_0578</a> | peg | 3389_24295_24059 | 24295 | 24059 | - | hypothetical protein                                                                                                               |                                  |
| 590 | 3389 | <a href="#">NEOS13_0579</a> | peg | 3389_24645_24496 | 24645 | 24496 | - | hypothetical protein                                                                                                               |                                  |
| 591 | 3390 | <a href="#">NEOS13_0580</a> | peg | 3390_1211_381    | 1211  | 381   | - | Mobile element protein                                                                                                             |                                  |
| 592 | 3391 | <a href="#">NEOS13_0581</a> | peg | 3391_42_1190     | 42    | 1190  | + | hypothetical protein                                                                                                               |                                  |
| 593 | 3392 | <a href="#">NEOS13_0582</a> | peg | 3392_60_263      | 60    | 263   | + | hypothetical protein                                                                                                               |                                  |
| 594 | 3392 | <a href="#">NEOS13_0583</a> | peg | 3392_1150_2226   | 1150  | 2226  | + | Branched-chain alpha-keto acid dehydrogenase, E1 component, alpha subunit (EC 1.2.4.4)                                             |                                  |
| 595 | 3392 | <a href="#">NEOS13_0584</a> | peg | 3392_2256_3233   | 2256  | 3233  | + | Branched-chain alpha-keto acid dehydrogenase, E1 component, beta subunit (EC 1.2.4.4)                                              | Glycolysis_Gluconeogenesis       |
| 596 | 3392 | <a href="#">NEOS13_0585</a> | peg | 3392_3246_4472   | 3246  | 4472  | + | Dihydrolipoamide acyltransferase component of branched-chain alpha-keto acid dehydrogenase complex (EC 2.3.1.168)                  | Glycolysis_Gluconeogenesis       |
| 597 | 3392 | <a href="#">NEOS13_0586</a> | peg | 3392_4435_4572   | 4435  | 4572  | + | hypothetical protein                                                                                                               |                                  |
| 598 | 3392 | <a href="#">NEOS13_0587</a> | peg | 3392_4726_6417   | 4726  | 6417  | + | Potassium-transporting ATPase A chain (EC 3.6.3.12) (TC 3.A.3.7.1)                                                                 |                                  |
| 599 | 3392 | <a href="#">NEOS13_0588</a> | peg | 3392_6488_8584   | 6488  | 8584  | + | Potassium-transporting ATPase B chain (EC 3.6.3.12) (TC 3.A.3.7.1)                                                                 |                                  |
| 600 | 3392 | <a href="#">NEOS13_0589</a> | peg | 3392_8622_9182   | 8622  | 9182  | + | Potassium-transporting ATPase C chain (EC 3.6.3.12) (TC 3.A.3.7.1)                                                                 |                                  |
| 601 | 3392 | <a href="#">NEOS13_0590</a> | peg | 3392_10789_12501 | 10789 | 12501 | + | hypothetical protein                                                                                                               |                                  |
| 602 | 3392 | <a href="#">NEOS13_0591</a> | peg | 3392_12967_14544 | 12967 | 14544 | + | Leucine-rich repeat containing protein                                                                                             | Leucine-rich repeat              |
| 603 | 3392 | <a href="#">NEOS13_0592</a> | peg | 3392_15297_15172 | 15297 | 15172 | - | hypothetical protein                                                                                                               |                                  |
| 604 | 3392 | <a href="#">NEOS13_0593</a> | peg | 3392_15614_15495 | 15614 | 15495 | - | hypothetical protein                                                                                                               |                                  |
| 605 | 3392 | <a href="#">NEOS13_0594</a> | peg | 3392_16026_15802 | 16026 | 15802 | - | hypothetical protein                                                                                                               |                                  |
| 606 | 3392 | <a href="#">NEOS13_0595</a> | peg | 3392_16346_17755 | 16346 | 17755 | + | hypothetical protein                                                                                                               |                                  |
| 607 | 3392 | <a href="#">NEOS13_0596</a> | peg | 3392_19313_18027 | 19313 | 18027 | - | RNA methyltransferase, TrmA family                                                                                                 |                                  |
| 608 | 3392 | <a href="#">NEOS13_0597</a> | peg | 3392_21063_19306 | 21063 | 19306 | - | Single-stranded-DNA-specific exonuclease RecJ (EC 3.1.-.-)                                                                         |                                  |
| 609 | 3392 | <a href="#">NEOS13_0598</a> | peg | 3392_26196_21622 | 26196 | 21622 | - | Protein-export membrane protein SecD (TC 3.A.5.1.1) / Protein-export membrane protein SecF (TC 3.A.5.1.1)                          | Sec_T2SS                         |
| 610 | 3392 | <a href="#">NEOS13_0599</a> | peg | 3392_28129_26576 | 28129 | 26576 | - | ADP/ATP Translocase, NTT1                                                                                                          | NTT                              |
| 611 | 3392 | <a href="#">NEOS13_0600</a> | peg | 3392_29321_28806 | 29321 | 28806 | - | FIG00493911: hypothetical protein                                                                                                  |                                  |
| 612 | 3392 | <a href="#">NEOS13_0601</a> | peg | 3392_29674_30789 | 29674 | 30789 | + | hypothetical protein                                                                                                               |                                  |
| 613 | 3392 | <a href="#">NEOS13_0602</a> | peg | 3392_30786_31778 | 30786 | 31778 | + | Manganese ABC transporter, periplasmic-binding protein SitA                                                                        | ABC_transporter                  |
| 614 | 3392 | <a href="#">NEOS13_0603</a> | peg | 3392_31775_32563 | 31775 | 32563 | + | Manganese ABC transporter, ATP-binding protein SitB                                                                                | ABC_transporter                  |
| 615 | 3392 | <a href="#">NEOS13_0604</a> | peg | 3392_32568_33920 | 32568 | 33920 | + | Manganese ABC transporter, inner membrane permease protein SitC                                                                    | ABC_transporter                  |
| 616 | 3392 | <a href="#">NEOS13_0605</a> | peg | 3392_33917_34927 | 33917 | 34927 | + | Manganese ABC transporter, inner membrane permease protein SitD                                                                    | ABC_transporter                  |
| 617 | 3392 | <a href="#">NEOS13_0606</a> | peg | 3392_35711_34941 | 35711 | 34941 | - | hypothetical protein                                                                                                               |                                  |
| 618 | 3392 | <a href="#">NEOS13_0607</a> | peg | 3392_36382_36263 | 36382 | 36263 | - | hypothetical protein                                                                                                               |                                  |
| 619 | 3393 | <a href="#">NEOS13_0608</a> | peg | 3393_1282_8      | 1282  | 8     | - | Leucine-rich repeat containing protein                                                                                             | Leucine-rich repeat              |
| 620 | 3393 | <a href="#">NEOS13_0609</a> | peg | 3393_1638_1345   | 1638  | 1345  | - | hypothetical protein                                                                                                               |                                  |
| 621 | 3393 | <a href="#">NEOS13_0610</a> | peg | 3393_1673_1786   | 1673  | 1786  | + | hypothetical protein                                                                                                               |                                  |
| 622 | 3393 | <a href="#">NEOS13_0611</a> | peg | 3393_2101_1886   | 2101  | 1886  | - | hypothetical protein                                                                                                               |                                  |
| 623 | 3393 | <a href="#">NEOS13_0612</a> | peg | 3393_2088_2477   | 2088  | 2477  | + | hypothetical protein                                                                                                               |                                  |
| 624 | 3393 | <a href="#">NEOS13_0613</a> | peg | 3393_2495_3331   | 2495  | 3331  | + | hypothetical protein                                                                                                               |                                  |
| 625 | 3393 | <a href="#">NEOS13_0614</a> | peg | 3393_4020_3427   | 4020  | 3427  | - | DNA-3-methyladenine glycosylase (EC 3.2.2.20)                                                                                      |                                  |
| 626 | 3393 | <a href="#">NEOS13_0615</a> | peg | 3393_4152_6374   | 4152  | 6374  | + | hypothetical protein                                                                                                               |                                  |
| 627 | 3393 | <a href="#">NEOS13_0616</a> | peg | 3393_6857_7534   | 6857  | 7534  | + | Aquaporin Z                                                                                                                        |                                  |
| 628 | 3393 | <a href="#">NEOS13_0617</a> | peg | 3393_7757_7572   | 7757  | 7572  | - | hypothetical protein                                                                                                               |                                  |
| 629 | 3393 | <a href="#">NEOS13_0618</a> | peg | 3393_8142_7900   | 8142  | 7900  | - | hypothetical protein                                                                                                               |                                  |

|     |      |                               |     |                  |       |       |   |                                                                                   |                     |
|-----|------|-------------------------------|-----|------------------|-------|-------|---|-----------------------------------------------------------------------------------|---------------------|
| 630 | 3393 | <a href="#">NEOS13_0619</a>   | peg | 3393_8276_10453  | 8276  | 10453 | + | POTASSIUM/PROTON ANTIporter ROSB                                                  |                     |
| 631 | 3393 | <a href="#">NEOS13_0620</a>   | peg | 3393_10605_10462 | 10605 | 10462 | - | hypothetical protein                                                              |                     |
| 632 | 3393 | <a href="#">NEOS13_0621</a>   | peg | 3393_11458_12309 | 11458 | 12309 | + | FIG01045360: hypothetical protein                                                 |                     |
| 633 | 3393 | <a href="#">NEOS13_0622</a>   | peg | 3393_12296_12457 | 12296 | 12457 | + | hypothetical protein                                                              |                     |
| 634 | 3393 | <a href="#">NEOS13_0623</a>   | peg | 3393_12556_12678 | 12556 | 12678 | + | hypothetical protein                                                              |                     |
| 635 | 3393 | <a href="#">NEOS13_0624</a>   | peg | 3393_12994_14454 | 12994 | 14454 | + | hypothetical protein                                                              |                     |
| 636 | 3393 | <a href="#">NEOS13_0625</a>   | peg | 3393_14544_25139 | 14544 | 25139 | + | hypothetical protein                                                              |                     |
| 637 | 3393 | <a href="#">NEOS13_0626</a>   | peg | 3393_25230_27572 | 25230 | 27572 | + | hypothetical protein                                                              |                     |
| 638 | 3393 | <a href="#">NEOS13_0627</a>   | peg | 3393_28381_28220 | 28381 | 28220 | - | hypothetical protein                                                              |                     |
| 639 | 3394 | <a href="#">NEOS13_0628</a>   | peg | 3394_626_474     | 626   | 474   | - | Leucine-rich repeat containing protein                                            | Leucine-rich repeat |
| 640 | 3394 | <a href="#">NEOS13_0629</a>   | peg | 3394_1317_673    | 1317  | 673   | - | Leucine-rich repeat containing protein                                            | Leucine-rich repeat |
| 641 | 3395 | <a href="#">NEOS13_0630</a>   | peg | 3395_1025_486    | 1025  | 486   | - | hypothetical protein                                                              |                     |
| 642 | 3395 | <a href="#">NEOS13_0631</a>   | peg | 3395_1644_1147   | 1644  | 1147  | - | hypothetical protein                                                              |                     |
| 643 | 3395 | <a href="#">NEOS13_0632</a>   | peg | 3395_3210_3395   | 3210  | 3395  | + | Mobile element protein                                                            |                     |
| 644 | 3395 | <a href="#">NEOS13_0633</a>   | peg | 3395_4039_4248   | 4039  | 4248  | + | Integrase, catalytic region                                                       |                     |
| 645 | 3395 | <a href="#">NEOS13_0634</a>   | peg | 3395_4651_5802   | 4651  | 5802  | + | hypothetical protein                                                              |                     |
| 646 | 3396 | <a href="#">NEOS13_0635</a>   | peg | 3396_915_1457    | 915   | 1457  | + | hypothetical protein                                                              |                     |
| 647 | 3396 | <a href="#">NEOS13_0636</a>   | peg | 3396_1674_1808   | 1674  | 1808  | + | hypothetical protein                                                              |                     |
| 648 | 3397 | <a href="#">NEOS13_0637</a>   | peg | 3397_1781_570    | 1781  | 570   | - | Leucine-rich repeat containing protein                                            | Leucine-rich repeat |
| 649 | 3399 | <a href="#">NEOS13_0638</a>   | peg | 3399_467_207     | 467   | 207   | - | hypothetical protein                                                              |                     |
| 650 | 3399 | <a href="#">NEOS13_0639</a>   | peg | 3399_622_1905    | 622   | 1905  | + | Proton/glutamate symport protein @ Sodium/glutamate symport protein               |                     |
| 651 | 3399 | <a href="#">NEOS13_0640</a>   | peg | 3399_2033_3061   | 2033  | 3061  | + | tRNA-specific 2-thiouridylase MnmA                                                |                     |
| 652 | 3399 | <a href="#">NEOS13_0641</a>   | peg | 3399_3806_3126   | 3806  | 3126  | - | hypothetical protein                                                              |                     |
| 653 | 3399 | <a href="#">NEOS13_0642</a>   | peg | 3399_4239_4379   | 4239  | 4379  | + | hypothetical protein                                                              |                     |
| 654 | 3399 | <a href="#">NEOS13_0643</a>   | peg | 3399_4390_4542   | 4390  | 4542  | + | hypothetical protein                                                              |                     |
| 655 | 3400 | <a href="#">NEOS13_0644</a>   | peg | 3400_467_207     | 467   | 207   | - | hypothetical protein                                                              |                     |
| 656 | 3400 | <a href="#">NEOS13_0645</a>   | peg | 3400_680_937     | 680   | 937   | + | KH domain RNA binding protein YlqC                                                |                     |
| 657 | 3400 | <a href="#">NEOS13_0012ma</a> | rna | 3400_1351_1279   | 1351  | 1279  | - | tRNA-Arg-TCT                                                                      | RNA                 |
| 658 | 3400 | <a href="#">NEOS13_0646</a>   | peg | 3400_2906_1857   | 2906  | 1857  | - | hypothetical protein                                                              |                     |
| 659 | 3400 | <a href="#">NEOS13_0647</a>   | peg | 3400_3191_3078   | 3191  | 3078  | - | hypothetical protein                                                              |                     |
| 660 | 3400 | <a href="#">NEOS13_0648</a>   | peg | 3400_3383_3997   | 3383  | 3997  | + | archaeal ATPase, fused to C-terminal DUF234 domain                                |                     |
| 661 | 3400 | <a href="#">NEOS13_0649</a>   | peg | 3400_3967_4782   | 3967  | 4782  | + | archaeal ATPase, fused to C-terminal DUF234 domain                                |                     |
| 662 | 3400 | <a href="#">NEOS13_0650</a>   | peg | 3400_6431_5088   | 6431  | 5088  | - | Leucine-rich repeat containing protein                                            | Leucine-rich repeat |
| 663 | 3400 | <a href="#">NEOS13_0651</a>   | peg | 3400_7146_7024   | 7146  | 7024  | - | hypothetical protein                                                              |                     |
| 664 | 3400 | <a href="#">NEOS13_0652</a>   | peg | 3400_7325_7185   | 7325  | 7185  | - | hypothetical protein                                                              |                     |
| 665 | 3400 | <a href="#">NEOS13_0653</a>   | peg | 3400_7492_8079   | 7492  | 8079  | + | 2-amino-4-hydroxy-6-hydroxymethylidihydropteridine pyrophosphokinase (EC 2.7.6.3) |                     |
| 666 | 3400 | <a href="#">NEOS13_0654</a>   | peg | 3400_8085_8849   | 8085  | 8849  | + | 2-Keto-3-deoxy-D-manno-octulosonate-8-phosphate synthase (EC 2.5.1.55)            |                     |
| 667 | 3400 | <a href="#">NEOS13_0655</a>   | peg | 3400_9011_9700   | 9011  | 9700  | + | hypothetical protein                                                              |                     |
| 668 | 3400 | <a href="#">NEOS13_0656</a>   | peg | 3400_9697_11229  | 9697  | 11229 | + | hypothetical protein                                                              |                     |
| 669 | 3400 | <a href="#">NEOS13_0657</a>   | peg | 3400_11344_11973 | 11344 | 11973 | + | hypothetical protein                                                              | ABC transporter     |
| 670 | 3400 | <a href="#">NEOS13_0658</a>   | peg | 3400_12605_12102 | 12605 | 12102 | - | Nucleoside diphosphate kinase (EC 2.7.4.6)                                        |                     |
| 671 | 3400 | <a href="#">NEOS13_0659</a>   | peg | 3400_13059_12625 | 13059 | 12625 | - | Nucleoside diphosphate kinase (EC 2.7.4.6)                                        |                     |
| 672 | 3400 | <a href="#">NEOS13_0660</a>   | peg | 3400_13157_14401 | 13157 | 14401 | + | Aminopeptidase S (Leu, Val, Phe, Tyr preference) (EC 3.4.11.24)                   |                     |
| 673 | 3400 | <a href="#">NEOS13_0661</a>   | peg | 3400_15061_15660 | 15061 | 15660 | + | hypothetical protein                                                              |                     |
| 674 | 3400 | <a href="#">NEOS13_0662</a>   | peg | 3400_15811_16188 | 15811 | 16188 | + | hypothetical protein                                                              |                     |
| 675 | 3400 | <a href="#">NEOS13_0663</a>   | peg | 3400_18024_16501 | 18024 | 16501 | - | EF hand domain/PKD domain protein                                                 |                     |
| 676 | 3400 | <a href="#">NEOS13_0664</a>   | peg | 3400_18417_18121 | 18417 | 18121 | - | Transposase, ISLbp3                                                               | Transposase         |
| 677 | 3400 | <a href="#">NEOS13_0665</a>   | peg | 3400_18902_19108 | 18902 | 19108 | + | hypothetical protein                                                              |                     |
| 678 | 3400 | <a href="#">NEOS13_0666</a>   | peg | 3400_19421_19546 | 19421 | 19546 | + | hypothetical protein                                                              |                     |
| 679 | 3401 | <a href="#">NEOS13_0667</a>   | peg | 3401_55_915      | 55    | 915   | + | conserved hypothetical protein                                                    |                     |
| 680 | 3401 | <a href="#">NEOS13_0668</a>   | peg | 3401_1469_1335   | 1469  | 1335  | - | hypothetical protein                                                              |                     |
| 681 | 3401 | <a href="#">NEOS13_0669</a>   | peg | 3401_2343_1666   | 2343  | 1666  | - | Cytidylate kinase (EC 2.7.4.14)                                                   |                     |
| 682 | 3401 | <a href="#">NEOS13_0670</a>   | peg | 3401_3222_2368   | 3222  | 2368  | - | Phosphatidate cytidyltransferase (EC 2.7.7.41)                                    |                     |
| 683 | 3401 | <a href="#">NEOS13_0671</a>   | peg | 3401_3977_3219   | 3977  | 3219  | - | Undecaprenyl pyrophosphate synthetase (EC 2.5.1.31)                               |                     |
| 684 | 3401 | <a href="#">NEOS13_0672</a>   | peg | 3401_5306_3987   | 5306  | 3987  | - | Adenylosuccinate synthetase (EC 6.3.4.4)                                          |                     |
| 685 | 3401 | <a href="#">NEOS13_0673</a>   | peg | 3401_7138_5330   | 7138  | 5330  | - | Translation elongation factor LepA                                                |                     |
| 686 | 3401 | <a href="#">NEOS13_0674</a>   | peg | 3401_7966_7331   | 7966  | 7331  | - | hypothetical protein                                                              |                     |
| 687 | 3401 | <a href="#">NEOS13_0013ma</a> | rna | 3401_8083_8000   | 8083  | 8000  | - | tRNA-Leu-CAG                                                                      | RNA                 |
| 688 | 3401 | <a href="#">NEOS13_0675</a>   | peg | 3401_8749_8138   | 8749  | 8138  | - | hypothetical protein                                                              |                     |
| 689 | 3401 | <a href="#">NEOS13_0676</a>   | peg | 3401_8917_10068  | 8917  | 10068 | + | Sulfite reductase [NADPH] flavoprotein alpha-component (EC 1.8.1.2)               |                     |
| 690 | 3401 | <a href="#">NEOS13_0677</a>   | peg | 3401_10655_10158 | 10655 | 10158 | - | 2-C-methyl-D-erythritol 2,4-cyclodiphosphate synthase (EC 4.6.1.12)               |                     |
| 691 | 3401 | <a href="#">NEOS13_0678</a>   | peg | 3401_11006_12022 | 11006 | 12022 | + | hypothetical protein                                                              |                     |
| 692 | 3401 | <a href="#">NEOS13_0679</a>   | peg | 3401_12078_13625 | 12078 | 13625 | + | UDP-N-acetylglucosamine 1-carboxyvinyltransferase (EC 2.5.1.7)                    |                     |
| 693 | 3401 | <a href="#">NEOS13_0680</a>   | peg | 3401_14409_14996 | 14409 | 14996 | + | hypothetical protein                                                              |                     |
| 694 | 3401 | <a href="#">NEOS13_0681</a>   | peg | 3401_15226_16725 | 15226 | 16725 | + | hypothetical protein                                                              |                     |
| 695 | 3401 | <a href="#">NEOS13_0682</a>   | peg | 3401_17079_16912 | 17079 | 16912 | - | hypothetical protein                                                              |                     |
| 696 | 3401 | <a href="#">NEOS13_0683</a>   | peg | 3401_17210_17404 | 17210 | 17404 | + | Mobile element protein                                                            |                     |

|     |      |                               |     |                  |       |       |   |                                                                                                                                                  |                           |
|-----|------|-------------------------------|-----|------------------|-------|-------|---|--------------------------------------------------------------------------------------------------------------------------------------------------|---------------------------|
| 697 | 3401 | <a href="#">NEOS13_0684</a>   | peg | 3401_17661_18530 | 17661 | 18530 | + | hypothetical protein                                                                                                                             |                           |
| 698 | 3401 | <a href="#">NEOS13_0685</a>   | peg | 3401_18858_18556 | 18858 | 18556 | - | hypothetical protein                                                                                                                             |                           |
| 699 | 3401 | <a href="#">NEOS13_0686</a>   | peg | 3401_19051_18938 | 19051 | 18938 | - | hypothetical protein                                                                                                                             |                           |
| 700 | 3403 | <a href="#">NEOS13_0687</a>   | peg | 3403_775_662     | 775   | 662   | - | hypothetical protein                                                                                                                             |                           |
| 701 | 3403 | <a href="#">NEOS13_0688</a>   | peg | 3403_2128_1271   | 2128  | 1271  | - | AMP nucleosidase (EC 3.2.2.4)                                                                                                                    |                           |
| 702 | 3403 | <a href="#">NEOS13_0689</a>   | peg | 3403_3773_2544   | 3773  | 2544  | - | hypothetical protein                                                                                                                             |                           |
| 703 | 3403 | <a href="#">NEOS13_0690</a>   | peg | 3403_4015_5619   | 4015  | 5619  | + | Peptide chain release factor 3                                                                                                                   |                           |
| 704 | 3403 | <a href="#">NEOS13_0691</a>   | peg | 3403_5701_5579   | 5701  | 5579  | - | hypothetical protein                                                                                                                             |                           |
| 705 | 3403 | <a href="#">NEOS13_0692</a>   | peg | 3403_6329_5817   | 6329  | 5817  | - | hypothetical protein                                                                                                                             |                           |
| 706 | 3403 | <a href="#">NEOS13_0693</a>   | peg | 3403_6402_7451   | 6402  | 7451  | + | A/G-specific adenine glycosylase (EC 3.2.2.-)                                                                                                    |                           |
| 707 | 3403 | <a href="#">NEOS13_0694</a>   | peg | 3403_7681_9597   | 7681  | 9597  | + | Leucine-rich repeat containing protein                                                                                                           | Leucine-rich repeat       |
| 708 | 3403 | <a href="#">NEOS13_0695</a>   | peg | 3403_9607_9726   | 9607  | 9726  | + | Leucine-rich repeat containing protein                                                                                                           | Leucine-rich repeat       |
| 709 | 3404 | <a href="#">NEOS13_0696</a>   | peg | 3404_835_659     | 835   | 659   | - | Leucine-rich repeat containing protein                                                                                                           | Leucine-rich repeat       |
| 710 | 3404 | <a href="#">NEOS13_0697</a>   | peg | 3404_2783_1182   | 2783  | 1182  | - | Leucine-rich repeat containing protein                                                                                                           | Leucine-rich repeat       |
| 711 | 3404 | <a href="#">NEOS13_0698</a>   | peg | 3404_3050_2826   | 3050  | 2826  | - | hypothetical protein                                                                                                                             |                           |
| 712 | 3404 | <a href="#">NEOS13_0699</a>   | peg | 3404_3239_3105   | 3239  | 3105  | - | hypothetical protein                                                                                                                             |                           |
| 713 | 3404 | <a href="#">NEOS13_0700</a>   | peg | 3404_3582_3698   | 3582  | 3698  | + | Mobile element protein                                                                                                                           |                           |
| 714 | 3405 | <a href="#">NEOS13_0701</a>   | peg | 3405_440_216     | 440   | 216   | - | hypothetical protein                                                                                                                             |                           |
| 715 | 3405 | <a href="#">NEOS13_0702</a>   | peg | 3405_629_495     | 629   | 495   | - | hypothetical protein                                                                                                                             |                           |
| 716 | 3405 | <a href="#">NEOS13_0703</a>   | peg | 3405_972_1088    | 972   | 1088  | + | Mobile element protein                                                                                                                           |                           |
| 717 | 3405 | <a href="#">NEOS13_0704</a>   | peg | 3405_1339_1488   | 1339  | 1488  | + | hypothetical protein                                                                                                                             |                           |
| 718 | 3405 | <a href="#">NEOS13_0705</a>   | peg | 3405_1765_1577   | 1765  | 1577  | - | hypothetical protein                                                                                                                             |                           |
| 719 | 3405 | <a href="#">NEOS13_0706</a>   | peg | 3405_2363_2740   | 2363  | 2740  | + | probable histone H1-like protein                                                                                                                 |                           |
| 720 | 3405 | <a href="#">NEOS13_0707</a>   | peg | 3405_2970_4427   | 2970  | 4427  | + | RNA methyltransferase, TrmA family                                                                                                               |                           |
| 721 | 3405 | <a href="#">NEOS13_0708</a>   | peg | 3405_4435_5535   | 4435  | 5535  | + | tRNA-guanine transglycosylase (EC 2.4.2.29)                                                                                                      |                           |
| 722 | 3405 | <a href="#">NEOS13_0709</a>   | peg | 3405_5547_5969   | 5547  | 5969  | + | Preprotein translocase subunit YajC (TC 3.A.5.1.1)                                                                                               |                           |
| 723 | 3405 | <a href="#">NEOS13_0710</a>   | peg | 3405_5981_6637   | 5981  | 6637  | + | Protein-L-isoaspartate O-methyltransferase (EC 2.1.1.77)                                                                                         |                           |
| 724 | 3405 | <a href="#">NEOS13_0711</a>   | peg | 3405_6920_7567   | 6920  | 7567  | + | hypothetical protein                                                                                                                             |                           |
| 725 | 3405 | <a href="#">NEOS13_0712</a>   | peg | 3405_8079_10043  | 8079  | 10043 | + | Leucine-rich repeat containing protein                                                                                                           | Leucine-rich repeat       |
| 726 | 3405 | <a href="#">NEOS13_0014ma</a> | tma | 3405_10911_10984 | 10911 | 10984 | + | tRNA-Arg-ACG                                                                                                                                     | RNA                       |
| 727 | 3405 | <a href="#">NEOS13_0713</a>   | peg | 3405_10985_11620 | 10985 | 11620 | + | Hydroxyacylglutathione hydrolase (EC 3.1.2.6)                                                                                                    |                           |
| 728 | 3405 | <a href="#">NEOS13_0714</a>   | peg | 3405_11648_12235 | 11648 | 12235 | + | Alkyl hydroperoxide reductase subunit C-like protein                                                                                             |                           |
| 729 | 3407 | <a href="#">NEOS13_0715</a>   | peg | 3407_554_2293    | 554   | 2293  | + | Leucine-rich repeat containing protein                                                                                                           | Leucine-rich repeat       |
| 730 | 3407 | <a href="#">NEOS13_0716</a>   | peg | 3407_2488_2372   | 2488  | 2372  | - | hypothetical protein                                                                                                                             |                           |
| 731 | 3407 | <a href="#">NEOS13_0717</a>   | peg | 3407_2600_3487   | 2600  | 3487  | + | Leucine-rich repeat containing protein                                                                                                           | Leucine-rich repeat       |
| 732 | 3407 | <a href="#">NEOS13_0718</a>   | peg | 3407_3710_3907   | 3710  | 3907  | + | Leucine-rich repeat containing protein                                                                                                           | Leucine-rich repeat       |
| 733 | 3407 | <a href="#">NEOS13_0719</a>   | peg | 3407_3996_4256   | 3996  | 4256  | + | hypothetical protein                                                                                                                             |                           |
| 734 | 3407 | <a href="#">NEOS13_0720</a>   | peg | 3407_4271_4441   | 4271  | 4441  | + | hypothetical protein                                                                                                                             |                           |
| 735 | 3407 | <a href="#">NEOS13_0721</a>   | peg | 3407_5518_4799   | 5518  | 4799  | - | Competence protein F homolog, phosphoribosyltransferase domain; protein YhgH required for utilization of DNA as sole source of carbon and energy | Genetic_competence        |
| 736 | 3407 | <a href="#">NEOS13_0722</a>   | peg | 3407_6468_5518   | 6468  | 5518  | - | unknown protein                                                                                                                                  |                           |
| 737 | 3407 | <a href="#">NEOS13_0723</a>   | peg | 3407_7215_8750   | 7215  | 8750  | + | Na(+)-translocating NADH-quinone reductase subunit B (EC 1.6.5.-)                                                                                | Oxidative_Phosphorylation |
| 738 | 3407 | <a href="#">NEOS13_0724</a>   | peg | 3407_8731_9663   | 8731  | 9663  | + | Na(+)-translocating NADH-quinone reductase subunit C (EC 1.6.5.-)                                                                                | Oxidative_Phosphorylation |
| 739 | 3407 | <a href="#">NEOS13_0725</a>   | peg | 3407_9802_10440  | 9802  | 10440 | + | Na(+)-translocating NADH-quinone reductase subunit D (EC 1.6.5.-)                                                                                | Oxidative_Phosphorylation |
| 740 | 3407 | <a href="#">NEOS13_0726</a>   | peg | 3407_10447_11184 | 10447 | 11184 | + | Na(+)-translocating NADH-quinone reductase subunit E (EC 1.6.5.-)                                                                                | Oxidative_Phosphorylation |
| 741 | 3407 | <a href="#">NEOS13_0727</a>   | peg | 3407_12119_13741 | 12119 | 13741 | + | hypothetical protein                                                                                                                             |                           |
| 742 | 3407 | <a href="#">NEOS13_0728</a>   | peg | 3407_13810_14133 | 13810 | 14133 | + | hypothetical protein                                                                                                                             |                           |
| 743 | 3407 | <a href="#">NEOS13_0729</a>   | peg | 3407_14652_14248 | 14652 | 14248 | - | Glycine cleavage system H protein                                                                                                                |                           |
| 744 | 3407 | <a href="#">NEOS13_0730</a>   | peg | 3407_15392_14763 | 15392 | 14763 | - | unknown protein                                                                                                                                  |                           |
| 745 | 3407 | <a href="#">NEOS13_0731</a>   | peg | 3407_17903_15510 | 17903 | 15510 | - | hypothetical protein                                                                                                                             |                           |
| 746 | 3407 | <a href="#">NEOS13_0732</a>   | peg | 3407_18975_18262 | 18975 | 18262 | - | Lipoate-protein ligase A                                                                                                                         |                           |
| 747 | 3407 | <a href="#">NEOS13_0733</a>   | peg | 3407_19731_19033 | 19731 | 19033 | - | hypothetical protein                                                                                                                             |                           |
| 748 | 3407 | <a href="#">NEOS13_0734</a>   | peg | 3407_19921_20631 | 19921 | 20631 | + | Ribonuclease III (EC 3.1.26.3)                                                                                                                   |                           |
| 749 | 3407 | <a href="#">NEOS13_0735</a>   | peg | 3407_20639_22015 | 20639 | 22015 | + | DNA repair protein RadA                                                                                                                          |                           |
| 750 | 3407 | <a href="#">NEOS13_0736</a>   | peg | 3407_22086_23399 | 22086 | 23399 | + | Porphobilinogen deaminase (EC 2.5.1.61)                                                                                                          |                           |
| 751 | 3407 | <a href="#">NEOS13_0737</a>   | peg | 3407_23653_25023 | 23653 | 25023 | + | Leucine-rich repeat containing protein                                                                                                           | Leucine-rich repeat       |
| 752 | 3407 | <a href="#">NEOS13_0738</a>   | peg | 3407_25260_26864 | 25260 | 26864 | + | Leucine-rich repeat containing protein                                                                                                           | Leucine-rich repeat       |
| 753 | 3407 | <a href="#">NEOS13_0739</a>   | peg | 3407_27333_27214 | 27333 | 27214 | - | hypothetical protein                                                                                                                             |                           |
| 754 | 3408 | <a href="#">NEOS13_0740</a>   | peg | 3408_508_206     | 508   | 206   | - | Leucine-rich repeat containing protein                                                                                                           | Leucine-rich repeat       |
| 755 | 3408 | <a href="#">NEOS13_0741</a>   | peg | 3408_1564_563    | 1564  | 563   | - | Leucine-rich repeat containing protein                                                                                                           | Leucine-rich repeat       |
| 756 | 3410 | <a href="#">NEOS13_0742</a>   | peg | 3410_118_348     | 118   | 348   | + | hypothetical protein                                                                                                                             |                           |
| 757 | 3410 | <a href="#">NEOS13_0743</a>   | peg | 3410_348_680     | 348   | 680   | + | hypothetical protein                                                                                                                             |                           |
| 758 | 3410 | <a href="#">NEOS13_0744</a>   | peg | 3410_2889_1174   | 2889  | 1174  | - | hypothetical protein                                                                                                                             |                           |
| 759 | 3410 | <a href="#">NEOS13_0745</a>   | peg | 3410_3290_3820   | 3290  | 3820  | + | Putative preQ0 transporter                                                                                                                       |                           |
| 760 | 3410 | <a href="#">NEOS13_0746</a>   | peg | 3410_5228_4086   | 5228  | 4086  | - | Branched-chain amino acid transport system carrier protein                                                                                       |                           |
| 761 | 3410 | <a href="#">NEOS13_0747</a>   | peg | 3410_5660_6199   | 5660  | 6199  | + | hypothetical protein                                                                                                                             |                           |
| 762 | 3410 | <a href="#">NEOS13_0748</a>   | peg | 3410_7112_6516   | 7112  | 6516  | - | hypothetical protein-signal peptide prediction                                                                                                   |                           |
| 763 | 3410 | <a href="#">NEOS13_0749</a>   | peg | 3410_8008_8229   | 8008  | 8229  | + | hypothetical protein                                                                                                                             |                           |
| 764 | 3410 | <a href="#">NEOS13_0750</a>   | peg | 3410_8440_8189   | 8440  | 8189  | - | hypothetical protein                                                                                                                             |                           |
| 765 | 3410 | <a href="#">NEOS13_0751</a>   | peg | 3410_8496_9467   | 8496  | 9467  | + | CBS domain protein                                                                                                                               |                           |
| 766 | 3410 | <a href="#">NEOS13_0752</a>   | peg | 3410_9474_10718  | 9474  | 10718 | + | Hemolysin                                                                                                                                        |                           |

|     |      |                               |     |                  |       |       |   |                                                                                             |                           |
|-----|------|-------------------------------|-----|------------------|-------|-------|---|---------------------------------------------------------------------------------------------|---------------------------|
| 767 | 3410 | <a href="#">NEOS13_0753</a>   | peg | 3410_10814_10960 | 10814 | 10960 | + | hypothetical protein                                                                        |                           |
| 768 | 3410 | <a href="#">NEOS13_0754</a>   | peg | 3410_13519_11000 | 13519 | 11000 | - | Leucine-rich repeat containing protein                                                      | Leucine-rich repeat       |
| 769 | 3410 | <a href="#">NEOS13_0755</a>   | peg | 3410_15578_13647 | 15578 | 13647 | - | Leucine-rich repeat containing protein                                                      | Leucine-rich repeat       |
| 770 | 3410 | <a href="#">NEOS13_0756</a>   | peg | 3410_18450_15997 | 18450 | 15997 | - | Leucine-rich repeat containing protein                                                      | Leucine-rich repeat       |
| 771 | 3410 | <a href="#">NEOS13_0757</a>   | peg | 3410_18750_18893 | 18750 | 18893 | + | hypothetical protein                                                                        |                           |
| 772 | 3410 | <a href="#">NEOS13_0758</a>   | peg | 3410_21444_18868 | 21444 | 18868 | - | hypothetical protein                                                                        |                           |
| 773 | 3410 | <a href="#">NEOS13_0759</a>   | peg | 3410_21555_21683 | 21555 | 21683 | + | hypothetical protein                                                                        |                           |
| 774 | 3410 | <a href="#">NEOS13_0760</a>   | peg | 3410_23071_22001 | 23071 | 22001 | - | Cysteine desulfurase (EC 2.8.1.7)                                                           |                           |
| 775 | 3410 | <a href="#">NEOS13_0761</a>   | peg | 3410_23894_23127 | 23894 | 23127 | - | Protein serine/threonine phosphatase PrpC, regulation of stationary phase                   |                           |
| 776 | 3410 | <a href="#">NEOS13_0762</a>   | peg | 3410_23980_24096 | 23980 | 24096 | + | hypothetical protein                                                                        |                           |
| 777 | 3410 | <a href="#">NEOS13_0763</a>   | peg | 3410_25351_24083 | 25351 | 24083 | - | proteinase inhibitor 14, serpin                                                             |                           |
| 778 | 3410 | <a href="#">NEOS13_0764</a>   | peg | 3410_26241_25351 | 26241 | 25351 | - | hypothetical protein                                                                        |                           |
| 779 | 3410 | <a href="#">NEOS13_0765</a>   | peg | 3410_26855_26319 | 26855 | 26319 | - | hypothetical protein                                                                        |                           |
| 780 | 3410 | <a href="#">NEOS13_0766</a>   | peg | 3410_28006_27341 | 28006 | 27341 | - | Nucleoside triphosphate pyrophosphohydrolase MazG (EC 3.6.1.8)                              |                           |
| 781 | 3410 | <a href="#">NEOS13_0767</a>   | peg | 3410_28317_28781 | 28317 | 28781 | + | hypothetical protein                                                                        |                           |
| 782 | 3410 | <a href="#">NEOS13_0768</a>   | peg | 3410_30885_29269 | 30885 | 29269 | - | hypothetical protein                                                                        |                           |
| 783 | 3410 | <a href="#">NEOS13_0769</a>   | peg | 3410_32045_30978 | 32045 | 30978 | - | Lipopolysaccharide heptosyltransferase I (EC 2.4.1.-)                                       |                           |
| 784 | 3410 | <a href="#">NEOS13_0770</a>   | peg | 3410_32917_32042 | 32917 | 32042 | - | hypothetical protein                                                                        |                           |
| 785 | 3410 | <a href="#">NEOS13_0771</a>   | peg | 3410_34037_33009 | 34037 | 33009 | - | Phenylalanyl-tRNA synthetase alpha chain (EC 6.1.1.20)                                      |                           |
| 786 | 3410 | <a href="#">NEOS13_0772</a>   | peg | 3410_34478_34122 | 34478 | 34122 | - | LSU ribosomal protein L20p                                                                  |                           |
| 787 | 3410 | <a href="#">NEOS13_0773</a>   | peg | 3410_35369_34803 | 35369 | 34803 | - | Translation initiation factor 3                                                             |                           |
| 788 | 3410 | <a href="#">NEOS13_0774</a>   | peg | 3410_37162_35462 | 37162 | 35462 | - | Threonyl-tRNA synthetase (EC 6.1.1.3)                                                       |                           |
| 789 | 3410 | <a href="#">NEOS13_0015ma</a> | rna | 3410_37249_37176 | 37249 | 37176 | - | tRNA-Val-GAC                                                                                | RNA                       |
| 790 | 3410 | <a href="#">NEOS13_0775</a>   | peg | 3410_39176_37350 | 39176 | 37350 | - | Excinuclease ABC subunit C                                                                  | ABC transporter           |
| 791 | 3410 | <a href="#">NEOS13_0776</a>   | peg | 3410_39390_39232 | 39390 | 39232 | - | hypothetical protein                                                                        |                           |
| 792 | 3410 | <a href="#">NEOS13_0777</a>   | peg | 3410_39808_39602 | 39808 | 39602 | - | hypothetical protein                                                                        |                           |
| 793 | 3410 | <a href="#">NEOS13_0778</a>   | peg | 3410_40991_39924 | 40991 | 39924 | - | Ribosomal RNA large subunit methyltransferase N (EC 2.1.1.-)                                |                           |
| 794 | 3410 | <a href="#">NEOS13_0779</a>   | peg | 3410_41438_41301 | 41438 | 41301 | - | hypothetical protein                                                                        |                           |
| 795 | 3410 | <a href="#">NEOS13_0780</a>   | peg | 3410_41468_44524 | 41468 | 44524 | + | Glycyl-tRNA synthetase alpha chain (EC 6.1.1.14)                                            |                           |
| 796 | 3410 | <a href="#">NEOS13_0781</a>   | peg | 3410_45696_44845 | 45696 | 44845 | - | Heme O synthase, protoheme IX farnesyltransferase (EC 2.5.1.-) COX10-CtaB                   | Oxidative_Phosphorylation |
| 797 | 3410 | <a href="#">NEOS13_0782</a>   | peg | 3410_46111_45746 | 46111 | 45746 | - | Cytochrome O ubiquinol oxidase subunit IV (EC 1.10.3.-)                                     | Oxidative_Phosphorylation |
| 798 | 3410 | <a href="#">NEOS13_0783</a>   | peg | 3410_46721_46113 | 46721 | 46113 | - | Cytochrome O ubiquinol oxidase subunit III (EC 1.10.3.-)                                    | Oxidative_Phosphorylation |
| 799 | 3410 | <a href="#">NEOS13_0784</a>   | peg | 3410_48412_46724 | 48412 | 46724 | - | Cytochrome O ubiquinol oxidase subunit I (EC 1.10.3.-)                                      | Oxidative_Phosphorylation |
| 800 | 3413 | <a href="#">NEOS13_0785</a>   | peg | 3413_1679_615    | 1679  | 615   | - | Leucine-rich repeat containing protein                                                      | Leucine-rich repeat       |
| 801 | 3413 | <a href="#">NEOS13_0786</a>   | peg | 3413_1674_1805   | 1674  | 1805  | + | hypothetical protein                                                                        |                           |
| 802 | 3413 | <a href="#">NEOS13_0787</a>   | peg | 3413_3368_2433   | 3368  | 2433  | - | YrdC/Sua5 family protein, required for threonylcarbamoyladenosine (t(6)A) formation in tRNA |                           |
| 803 | 3413 | <a href="#">NEOS13_0788</a>   | peg | 3413_4591_3353   | 4591  | 3353  | - | Cysteine desulfurase (EC 2.8.1.7), SufS subfamily                                           |                           |
| 804 | 3413 | <a href="#">NEOS13_0789</a>   | peg | 3413_5918_4572   | 5918  | 4572  | - | Iron-sulfur cluster assembly protein SufD                                                   |                           |
| 805 | 3413 | <a href="#">NEOS13_0790</a>   | peg | 3413_6700_5915   | 6700  | 5915  | - | Iron-sulfur cluster assembly ATPase protein SufC                                            |                           |
| 806 | 3413 | <a href="#">NEOS13_0791</a>   | peg | 3413_8146_6707   | 8146  | 6707  | - | Iron-sulfur cluster assembly protein SufB                                                   |                           |
| 807 | 3413 | <a href="#">NEOS13_0792</a>   | peg | 3413_11203_8639  | 11203 | 8639  | - | hypothetical protein                                                                        |                           |
| 808 | 3413 | <a href="#">NEOS13_0793</a>   | peg | 3413_12332_11229 | 12332 | 11229 | - | hypothetical protein                                                                        |                           |
| 809 | 3413 | <a href="#">NEOS13_0794</a>   | peg | 3413_12649_12801 | 12649 | 12801 | + | hypothetical protein                                                                        |                           |
| 810 | 3413 | <a href="#">NEOS13_0795</a>   | peg | 3413_12798_12962 | 12798 | 12962 | + | hypothetical protein                                                                        |                           |
| 811 | 3413 | <a href="#">NEOS13_0796</a>   | peg | 3413_13078_13338 | 13078 | 13338 | + | hypothetical protein                                                                        |                           |
| 812 | 3414 | <a href="#">NEOS13_0797</a>   | peg | 3414_22_225      | 22    | 225   | + | hypothetical protein                                                                        |                           |
| 813 | 3414 | <a href="#">NEOS13_0798</a>   | peg | 3414_719_925     | 719   | 925   | + | hypothetical protein                                                                        |                           |
| 814 | 3414 | <a href="#">NEOS13_0799</a>   | peg | 3414_1071_1445   | 1071  | 1445  | + | hypothetical protein                                                                        |                           |
| 815 | 3416 | <a href="#">NEOS13_0800</a>   | peg | 3416_36_1076     | 36    | 1076  | + | Leucine-rich repeat containing protein                                                      | Leucine-rich repeat       |
| 816 | 3416 | <a href="#">NEOS13_0801</a>   | peg | 3416_1096_1239   | 1096  | 1239  | + | hypothetical protein                                                                        |                           |
| 817 | 3417 | <a href="#">NEOS13_0802</a>   | peg | 3417_2308_968    | 2308  | 968   | - | Leucine-rich repeat containing protein                                                      | Leucine-rich repeat       |
| 818 | 3417 | <a href="#">NEOS13_0803</a>   | peg | 3417_2533_2417   | 2533  | 2417  | - | hypothetical protein                                                                        |                           |
| 819 | 3417 | <a href="#">NEOS13_0804</a>   | peg | 3417_2696_2565   | 2696  | 2565  | - | hypothetical protein                                                                        |                           |
| 820 | 3417 | <a href="#">NEOS13_0805</a>   | peg | 3417_3300_3184   | 3300  | 3184  | - | hypothetical protein                                                                        |                           |
| 821 | 3417 | <a href="#">NEOS13_0806</a>   | peg | 3417_3442_3597   | 3442  | 3597  | + | Mobile element protein                                                                      |                           |
| 822 | 3417 | <a href="#">NEOS13_0807</a>   | peg | 3417_3814_3674   | 3814  | 3674  | - | hypothetical protein                                                                        |                           |
| 823 | 3417 | <a href="#">NEOS13_0808</a>   | peg | 3417_6274_4478   | 6274  | 4478  | - | hypothetical protein                                                                        |                           |
| 824 | 3417 | <a href="#">NEOS13_0809</a>   | peg | 3417_6645_6806   | 6645  | 6806  | + | hypothetical protein                                                                        |                           |
| 825 | 3417 | <a href="#">NEOS13_0810</a>   | peg | 3417_7058_10480  | 7058  | 10480 | + | Exodeoxyribonuclease V gamma chain (EC 3.1.11.5)                                            |                           |
| 826 | 3417 | <a href="#">NEOS13_0811</a>   | peg | 3417_10640_11461 | 10640 | 11461 | + | hypothetical protein                                                                        |                           |
| 827 | 3417 | <a href="#">NEOS13_0812</a>   | peg | 3417_12600_16106 | 12600 | 16106 | + | Exodeoxyribonuclease V beta chain (EC 3.1.11.5)                                             |                           |
| 828 | 3417 | <a href="#">NEOS13_0813</a>   | peg | 3417_16163_17911 | 16163 | 17911 | + | Exodeoxyribonuclease V alpha chain (EC 3.1.11.5)                                            |                           |
| 829 | 3417 | <a href="#">NEOS13_0814</a>   | peg | 3417_18745_18356 | 18745 | 18356 | - | hypothetical protein                                                                        |                           |
| 830 | 3417 | <a href="#">NEOS13_0815</a>   | peg | 3417_19992_18823 | 19992 | 18823 | - | hypothetical protein                                                                        |                           |
| 831 | 3417 | <a href="#">NEOS13_0816</a>   | peg | 3417_21339_20854 | 21339 | 20854 | - | hypothetical protein                                                                        |                           |
| 832 | 3417 | <a href="#">NEOS13_0817</a>   | peg | 3417_21497_21634 | 21497 | 21634 | + | hypothetical protein                                                                        |                           |

|     |      |                                |     |                  |       |       |   |                                                                                                                                |                        |
|-----|------|--------------------------------|-----|------------------|-------|-------|---|--------------------------------------------------------------------------------------------------------------------------------|------------------------|
| 833 | 3417 | <a href="#">NEOS13_0818</a>    | peg | 3417_21651_23816 | 21651 | 23816 | + | Transcription elongation factor GreA                                                                                           |                        |
| 834 | 3417 | <a href="#">NEOS13_0819</a>    | peg | 3417_23817_24425 | 23817 | 24425 | + | Nucleoside 5-triphosphatase RdgB (dHATP, dTTP, XTP-specific) (EC 3.6.1.15)                                                     |                        |
| 835 | 3417 | <a href="#">NEOS13_0820</a>    | peg | 3417_24434_25129 | 24434 | 25129 | + | hypothetical protein                                                                                                           |                        |
| 836 | 3417 | <a href="#">NEOS13_0821</a>    | peg | 3417_25339_26322 | 25339 | 26322 | + | hypothetical protein                                                                                                           |                        |
| 837 | 3417 | <a href="#">NEOS13_0016m_a</a> | rna | 3417_26467_26539 | 26467 | 26539 | + | tRNA-Ala-GGC                                                                                                                   | RNA                    |
| 838 | 3417 | <a href="#">NEOS13_0822</a>    | peg | 3417_26619_26768 | 26619 | 26768 | + | hypothetical protein                                                                                                           |                        |
| 839 | 3417 | <a href="#">NEOS13_0823</a>    | peg | 3417_27243_27010 | 27243 | 27010 | - | hypothetical protein                                                                                                           |                        |
| 840 | 3417 | <a href="#">NEOS13_0824</a>    | peg | 3417_28112_27384 | 28112 | 27384 | - | hypothetical protein                                                                                                           |                        |
| 841 | 3417 | <a href="#">NEOS13_0825</a>    | peg | 3417_28906_28175 | 28906 | 28175 | - | hypothetical protein                                                                                                           |                        |
| 842 | 3417 | <a href="#">NEOS13_0826</a>    | peg | 3417_28906_29022 | 28906 | 29022 | + | hypothetical protein                                                                                                           |                        |
| 843 | 3417 | <a href="#">NEOS13_0827</a>    | peg | 3417_30266_29307 | 30266 | 29307 | - | hypothetical protein                                                                                                           |                        |
| 844 | 3417 | <a href="#">NEOS13_0828</a>    | peg | 3417_32127_30685 | 32127 | 30685 | - | hypothetical protein                                                                                                           | Outer membrane protein |
| 845 | 3417 | <a href="#">NEOS13_0829</a>    | peg | 3417_35956_33017 | 35956 | 33017 | - | hypothetical protein                                                                                                           |                        |
| 846 | 3417 | <a href="#">NEOS13_0830</a>    | peg | 3417_36975_36154 | 36975 | 36154 | - | hypothetical protein                                                                                                           |                        |
| 847 | 3417 | <a href="#">NEOS13_0831</a>    | peg | 3417_37298_39235 | 37298 | 39235 | + | Threonyl-tRNA synthetase (EC 6.1.1.3)                                                                                          |                        |
| 848 | 3417 | <a href="#">NEOS13_0832</a>    | peg | 3417_39223_39975 | 39223 | 39975 | + | Septum site-determining protein MinD                                                                                           |                        |
| 849 | 3417 | <a href="#">NEOS13_0833</a>    | peg | 3417_40112_40858 | 40112 | 40858 | + | Virulence plasmid protein pGP6-D                                                                                               |                        |
| 850 | 3417 | <a href="#">NEOS13_0834</a>    | peg | 3417_41447_41331 | 41447 | 41331 | - | hypothetical protein                                                                                                           |                        |
| 851 | 3417 | <a href="#">NEOS13_0835</a>    | peg | 3417_41495_41641 | 41495 | 41641 | + | hypothetical protein                                                                                                           |                        |
| 852 | 3417 | <a href="#">NEOS13_0836</a>    | peg | 3417_41770_42477 | 41770 | 42477 | + | hypothetical protein                                                                                                           |                        |
| 853 | 3418 | <a href="#">NEOS13_0837</a>    | peg | 3418_63_248      | 63    | 248   | + | hypothetical protein                                                                                                           |                        |
| 854 | 3418 | <a href="#">NEOS13_0838</a>    | peg | 3418_1318_638    | 1318  | 638   | - | Leucine-rich repeat containing protein                                                                                         | Leucine-rich repeat    |
| 855 | 3419 | <a href="#">NEOS13_0839</a>    | peg | 3419_314_54      | 314   | 54    | - | hypothetical protein                                                                                                           |                        |
| 856 | 3419 | <a href="#">NEOS13_0840</a>    | peg | 3419_328_480     | 328   | 480   | + | hypothetical protein                                                                                                           |                        |
| 857 | 3419 | <a href="#">NEOS13_0841</a>    | peg | 3419_500_1387    | 500   | 1387  | + | Protein YicC                                                                                                                   |                        |
| 858 | 3419 | <a href="#">NEOS13_0842</a>    | peg | 3419_1377_1958   | 1377  | 1958  | + | Guanylate kinase (EC 2.7.4.8)                                                                                                  |                        |
| 859 | 3419 | <a href="#">NEOS13_0843</a>    | peg | 3419_1983_2306   | 1983  | 2306  | + | hypothetical protein                                                                                                           |                        |
| 860 | 3419 | <a href="#">NEOS13_0844</a>    | peg | 3419_2328_2939   | 2328  | 2939  | + | hypothetical protein                                                                                                           |                        |
| 861 | 3419 | <a href="#">NEOS13_0845</a>    | peg | 3419_2993_5044   | 2993  | 5044  | + | Methionyl-tRNA synthetase (EC 6.1.1.10)                                                                                        |                        |
| 862 | 3419 | <a href="#">NEOS13_0846</a>    | peg | 3419_5883_5608   | 5883  | 5608  | - | LSU ribosomal protein L28p                                                                                                     |                        |
| 863 | 3419 | <a href="#">NEOS13_0847</a>    | peg | 3419_6434_5997   | 6434  | 5997  | - | hypothetical protein                                                                                                           |                        |
| 864 | 3419 | <a href="#">NEOS13_0848</a>    | peg | 3419_6598_8013   | 6598  | 8013  | + | Soluble pyridine nucleotide transhydrogenase (EC 1.6.1.1)                                                                      |                        |
| 865 | 3419 | <a href="#">NEOS13_0849</a>    | peg | 3419_8000_8521   | 8000  | 8521  | + | hypothetical protein                                                                                                           |                        |
| 866 | 3419 | <a href="#">NEOS13_0850</a>    | peg | 3419_11182_8576  | 11182 | 8576  | - | ClpB protein                                                                                                                   |                        |
| 867 | 3419 | <a href="#">NEOS13_0851</a>    | peg | 3419_11420_11286 | 11420 | 11286 | - | hypothetical protein                                                                                                           |                        |
| 868 | 3419 | <a href="#">NEOS13_0852</a>    | peg | 3419_12311_11688 | 12311 | 11688 | - | hypothetical protein                                                                                                           |                        |
| 869 | 3419 | <a href="#">NEOS13_0853</a>    | peg | 3419_12473_12610 | 12473 | 12610 | + | hypothetical protein                                                                                                           |                        |
| 870 | 3419 | <a href="#">NEOS13_0854</a>    | peg | 3419_12846_14762 | 12846 | 14762 | + | 1-hydroxy-2-methyl-2-(E)-butenyl 4-diphosphate synthase (EC 1.17.7.1)                                                          |                        |
| 871 | 3419 | <a href="#">NEOS13_0855</a>    | peg | 3419_14889_15002 | 14889 | 15002 | + | hypothetical protein                                                                                                           |                        |
| 872 | 3419 | <a href="#">NEOS13_0856</a>    | peg | 3419_15209_16147 | 15209 | 16147 | + | ankyrin repeat protein                                                                                                         | Ankyrin                |
| 873 | 3419 | <a href="#">NEOS13_0857</a>    | peg | 3419_16987_16388 | 16987 | 16388 | - | Cob(I)alamin adenosyltransferase PduO (EC 2.5.1.17)                                                                            |                        |
| 874 | 3419 | <a href="#">NEOS13_0858</a>    | peg | 3419_17838_16990 | 17838 | 16990 | - | hypothetical protein                                                                                                           |                        |
| 875 | 3419 | <a href="#">NEOS13_0859</a>    | peg | 3419_17963_18091 | 17963 | 18091 | + | hypothetical protein                                                                                                           |                        |
| 876 | 3419 | <a href="#">NEOS13_0860</a>    | peg | 3419_19794_18232 | 19794 | 18232 | - | hypothetical protein                                                                                                           |                        |
| 877 | 3419 | <a href="#">NEOS13_0861</a>    | peg | 3419_21396_19795 | 21396 | 19795 | - | 4-alpha-glucanotransferase (amylomaltase) (EC 2.4.1.25)                                                                        | T3SA1                  |
| 878 | 3419 | <a href="#">NEOS13_0862</a>    | peg | 3419_21518_21634 | 21518 | 21634 | + | hypothetical protein                                                                                                           | T3SA1                  |
| 879 | 3419 | <a href="#">NEOS13_0863</a>    | peg | 3419_22060_21587 | 22060 | 21587 | - | hypothetical protein                                                                                                           | T3SA1                  |
| 880 | 3419 | <a href="#">NEOS13_0864</a>    | peg | 3419_22388_22068 | 22388 | 22068 | - | hypothetical protein                                                                                                           | T3SA1                  |
| 881 | 3419 | <a href="#">NEOS13_0865</a>    | peg | 3419_23318_22410 | 23318 | 22410 | - | hypothetical protein                                                                                                           | T3SA1                  |
| 882 | 3419 | <a href="#">NEOS13_0866</a>    | peg | 3419_25536_23356 | 25536 | 23356 | - | Low Calcium Response D (Type III secretion inner membrane protein SctV)                                                        | T3SA1                  |
| 883 | 3419 | <a href="#">NEOS13_0867</a>    | peg | 3419_26613_25540 | 26613 | 25540 | - | Type III secretion inner membrane protein (YscU, SpaS, EscU, HrcU, SsaU, homologous to flagellar export components)            | T3SA1                  |
| 884 | 3419 | <a href="#">NEOS13_0868</a>    | peg | 3419_27179_27607 | 27179 | 27607 | + | transposase, IS4 family protein                                                                                                | T3SA1, Transposase     |
| 885 | 3420 | <a href="#">NEOS13_0869</a>    | peg | 3420_22_189      | 22    | 189   | + | hypothetical protein                                                                                                           |                        |
| 886 | 3420 | <a href="#">NEOS13_0870</a>    | peg | 3420_448_1848    | 448   | 1848  | + | hypothetical protein                                                                                                           |                        |
| 887 | 3420 | <a href="#">NEOS13_0871</a>    | peg | 3420_2076_2783   | 2076  | 2783  | + | hypothetical protein                                                                                                           |                        |
| 888 | 3420 | <a href="#">NEOS13_0872</a>    | peg | 3420_2799_3467   | 2799  | 3467  | + | hypothetical protein                                                                                                           |                        |
| 889 | 3420 | <a href="#">NEOS13_0873</a>    | peg | 3420_3580_3711   | 3580  | 3711  | + | hypothetical protein                                                                                                           |                        |
| 890 | 3420 | <a href="#">NEOS13_0874</a>    | peg | 3420_3713_3844   | 3713  | 3844  | + | hypothetical protein                                                                                                           |                        |
| 891 | 3420 | <a href="#">NEOS13_0875</a>    | peg | 3420_3914_4087   | 3914  | 4087  | + | hypothetical protein                                                                                                           |                        |
| 892 | 3420 | <a href="#">NEOS13_0876</a>    | peg | 3420_6442_4466   | 6442  | 4466  | - | Chaperone protein DnaK                                                                                                         |                        |
| 893 | 3420 | <a href="#">NEOS13_0877</a>    | peg | 3420_7202_6582   | 7202  | 6582  | - | Heat shock protein GrpE                                                                                                        |                        |
| 894 | 3420 | <a href="#">NEOS13_0878</a>    | peg | 3420_8410_7217   | 8410  | 7217  | - | Heat-inducible transcription repressor HrcA                                                                                    |                        |
| 895 | 3420 | <a href="#">NEOS13_0879</a>    | peg | 3420_9401_8628   | 9401  | 8628  | - | hypothetical protein                                                                                                           |                        |
| 896 | 3420 | <a href="#">NEOS13_0880</a>    | peg | 3420_10928_9561  | 10928 | 9561  | - | hypothetical protein                                                                                                           |                        |
| 897 | 3420 | <a href="#">NEOS13_0881</a>    | peg | 3420_12952_11216 | 12952 | 11216 | - | hypothetical protein                                                                                                           |                        |
| 898 | 3420 | <a href="#">NEOS13_0882</a>    | peg | 3420_15326_13338 | 15326 | 13338 | - | Lead, cadmium, zinc and mercury transporting ATPase (EC 3.6.3.3) (EC 3.6.3.5); Copper-translocating P-type ATPase (EC 3.6.3.4) |                        |
| 899 | 3420 | <a href="#">NEOS13_0883</a>    | peg | 3420_16090_15332 | 16090 | 15332 | - | hypothetical protein                                                                                                           |                        |
| 900 | 3420 | <a href="#">NEOS13_0884</a>    | peg | 3420_16302_17219 | 16302 | 17219 | + | hypothetical protein                                                                                                           |                        |
| 901 | 3420 | <a href="#">NEOS13_0885</a>    | peg | 3420_19404_17341 | 19404 | 17341 | - | hypothetical protein                                                                                                           |                        |
| 902 | 3421 | <a href="#">NEOS13_0886</a>    | peg | 3421_35_982      | 35    | 982   | + | Leucine-rich repeat containing protein                                                                                         | Leucine-rich repeat    |
| 903 | 3421 | <a href="#">NEOS13_0887</a>    | peg | 3421_1002_1145   | 1002  | 1145  | + | hypothetical protein                                                                                                           |                        |



|     |      |                             |     |                  |       |       |   |                                                                                                       |                           |
|-----|------|-----------------------------|-----|------------------|-------|-------|---|-------------------------------------------------------------------------------------------------------|---------------------------|
| 904 | 3422 | <a href="#">NEOS13_0888</a> | peg | 3422_1894_1037   | 1894  | 1037  | - | hypothetical protein                                                                                  |                           |
| 905 | 3423 | <a href="#">NEOS13_0889</a> | peg | 3423_1112_348    | 1112  | 348   | - | Leucine-rich repeat containing protein                                                                | Leucine-rich repeat       |
| 906 | 3424 | <a href="#">NEOS13_0890</a> | peg | 3424_31_204      | 31    | 204   | + | hypothetical protein                                                                                  |                           |
| 907 | 3424 | <a href="#">NEOS13_0891</a> | peg | 3424_468_1886    | 468   | 1886  | + | Leucine-rich repeat containing protein                                                                | Leucine-rich repeat       |
| 908 | 3424 | <a href="#">NEOS13_0892</a> | peg | 3424_2868_2080   | 2868  | 2080  | - | nifU protein, putative                                                                                |                           |
| 909 | 3424 | <a href="#">NEOS13_0893</a> | peg | 3424_4045_2879   | 4045  | 2879  | - | Cysteine desulfurase (EC 2.8.1.7)                                                                     |                           |
| 910 | 3424 | <a href="#">NEOS13_0894</a> | peg | 3424_4703_4047   | 4703  | 4047  | - | Phosphoglycerate mutase (EC 5.4.2.1)                                                                  | Glycolysis_Gluconogenesis |
| 911 | 3424 | <a href="#">NEOS13_0895</a> | peg | 3424_4972_5649   | 4972  | 5649  | + | putative ribosomal large chain pseudouridine synthase B                                               |                           |
| 912 | 3424 | <a href="#">NEOS13_0896</a> | peg | 3424_5649_6815   | 5649  | 6815  | + | hypothetical protein                                                                                  |                           |
| 913 | 3424 | <a href="#">NEOS13_0897</a> | peg | 3424_6828_8219   | 6828  | 8219  | + | hypothetical protein                                                                                  |                           |
| 914 | 3424 | <a href="#">NEOS13_0898</a> | peg | 3424_9268_8222   | 9268  | 8222  | - | hypothetical protein                                                                                  |                           |
| 915 | 3424 | <a href="#">NEOS13_0899</a> | peg | 3424_10125_9436  | 10125 | 9436  | - | hypothetical protein                                                                                  |                           |
| 916 | 3424 | <a href="#">NEOS13_0900</a> | peg | 3424_10908_10141 | 10908 | 10141 | - | hypothetical protein                                                                                  |                           |
| 917 | 3425 | <a href="#">NEOS13_0901</a> | peg | 3425_22_1353     | 22    | 1353  | + | Leucine-rich repeat containing protein                                                                | Leucine-rich repeat       |
| 918 | 3425 | <a href="#">NEOS13_0902</a> | peg | 3425_1723_1854   | 1723  | 1854  | + | hypothetical protein                                                                                  |                           |
| 919 | 3425 | <a href="#">NEOS13_0903</a> | peg | 3425_2604_2269   | 2604  | 2269  | - | hypothetical protein                                                                                  |                           |
| 920 | 3425 | <a href="#">NEOS13_0904</a> | peg | 3425_3396_2674   | 3396  | 2674  | - | hypothetical protein                                                                                  |                           |
| 921 | 3426 | <a href="#">NEOS13_0905</a> | peg | 3426_15_1049     | 15    | 1049  | + | Leucine-rich repeat containing protein                                                                | Leucine-rich repeat       |
| 922 | 3426 | <a href="#">NEOS13_0906</a> | peg | 3426_1543_1361   | 1543  | 1361  | - | hypothetical protein                                                                                  |                           |
| 923 | 3426 | <a href="#">NEOS13_0907</a> | peg | 3426_1538_2740   | 1538  | 2740  | + | Leucine-rich repeat containing protein                                                                | Leucine-rich repeat       |
| 924 | 3426 | <a href="#">NEOS13_0908</a> | peg | 3426_5011_4262   | 5011  | 4262  | - | tRNA pseudouridine synthase A (EC 4.2.1.70)                                                           |                           |
| 925 | 3426 | <a href="#">NEOS13_0909</a> | peg | 3426_5698_5015   | 5698  | 5015  | - | 2-C-methyl-D-erythritol 4-phosphate cytidyltransferase (EC 2.7.7.60)                                  |                           |
| 926 | 3426 | <a href="#">NEOS13_0910</a> | peg | 3426_6683_5703   | 6683  | 5703  | - | hypothetical protein                                                                                  |                           |
| 927 | 3426 | <a href="#">NEOS13_0911</a> | peg | 3426_7057_6785   | 7057  | 6785  | - | SWIB (YM74) complex protein                                                                           |                           |
| 928 | 3426 | <a href="#">NEOS13_0912</a> | peg | 3426_7291_9501   | 7291  | 9501  | + | hypothetical protein                                                                                  |                           |
| 929 | 3426 | <a href="#">NEOS13_0913</a> | peg | 3426_9918_9532   | 9918  | 9532  | - | hypothetical protein                                                                                  |                           |
| 930 | 3426 | <a href="#">NEOS13_0914</a> | peg | 3426_9944_10096  | 9944  | 10096 | + | hypothetical protein                                                                                  |                           |
| 931 | 3426 | <a href="#">NEOS13_0915</a> | peg | 3426_11596_10289 | 11596 | 10289 | - | hypothetical protein                                                                                  |                           |
| 932 | 3426 | <a href="#">NEOS13_0916</a> | peg | 3426_12172_13152 | 12172 | 13152 | + | Peptide chain release factor 2; programmed frameshift-containing                                      |                           |
| 933 | 3426 | <a href="#">NEOS13_0917</a> | peg | 3426_13149_13661 | 13149 | 13661 | + | Amino Group Acetyl Transferase                                                                        |                           |
| 934 | 3426 | <a href="#">NEOS13_0918</a> | peg | 3426_13708_14385 | 13708 | 14385 | + | hypothetical protein                                                                                  |                           |
| 935 | 3426 | <a href="#">NEOS13_0919</a> | peg | 3426_14431_15156 | 14431 | 15156 | + | FIG000859: hypothetical protein YebC                                                                  |                           |
| 936 | 3426 | <a href="#">NEOS13_0920</a> | peg | 3426_15782_16759 | 15782 | 16759 | + | hypothetical protein                                                                                  |                           |
| 937 | 3426 | <a href="#">NEOS13_0921</a> | peg | 3426_17086_18609 | 17086 | 18609 | + | Prolyl-tRNA synthetase (EC 6.1.1.15)                                                                  |                           |
| 938 | 3426 | <a href="#">NEOS13_0922</a> | peg | 3426_19148_18831 | 19148 | 18831 | - | hypothetical protein                                                                                  |                           |
| 939 | 3426 | <a href="#">NEOS13_0923</a> | peg | 3426_19359_19709 | 19359 | 19709 | + | hypothetical protein                                                                                  |                           |
| 940 | 3426 | <a href="#">NEOS13_0924</a> | peg | 3426_20606_19683 | 20606 | 19683 | - | Integral membrane protein TerC                                                                        |                           |
| 941 | 3426 | <a href="#">NEOS13_0925</a> | peg | 3426_20649_20771 | 20649 | 20771 | + | hypothetical protein                                                                                  |                           |
| 942 | 3426 | <a href="#">NEOS13_0926</a> | peg | 3426_21068_24619 | 21068 | 24619 | + | Chromosome partition protein smc                                                                      |                           |
| 943 | 3427 | <a href="#">NEOS13_0927</a> | peg | 3427_18_1205     | 18    | 1205  | + | Leucine-rich repeat containing protein                                                                | Leucine-rich repeat       |
| 944 | 3428 | <a href="#">NEOS13_0928</a> | peg | 3428_148_291     | 148   | 291   | + | hypothetical protein                                                                                  |                           |
| 945 | 3428 | <a href="#">NEOS13_0929</a> | peg | 3428_545_333     | 545   | 333   | - | hypothetical protein                                                                                  |                           |
| 946 | 3428 | <a href="#">NEOS13_0930</a> | peg | 3428_1645_3864   | 1645  | 3864  | + | hypothetical protein                                                                                  |                           |
| 947 | 3428 | <a href="#">NEOS13_0931</a> | peg | 3428_4753_5727   | 4753  | 5727  | + | hypothetical protein                                                                                  |                           |
| 948 | 3428 | <a href="#">NEOS13_0932</a> | peg | 3428_8314_5918   | 8314  | 5918  | - | Xylulose-5-phosphate phosphoketolase (EC 4.1.2.9); Fructose-6-phosphate phosphoketolase (EC 4.1.2.22) |                           |
| 949 | 3428 | <a href="#">NEOS13_0933</a> | peg | 3428_9914_8889   | 9914  | 8889  | - | Porphobilinogen synthase (EC 4.2.1.24)                                                                |                           |
| 950 | 3428 | <a href="#">NEOS13_0934</a> | peg | 3428_10450_10301 | 10450 | 10301 | - | hypothetical protein                                                                                  |                           |
| 951 | 3428 | <a href="#">NEOS13_0935</a> | peg | 3428_10683_11282 | 10683 | 11282 | + | Putative two-domain glycosyltransferase                                                               |                           |
| 952 | 3428 | <a href="#">NEOS13_0936</a> | peg | 3428_12776_11568 | 12776 | 11568 | - | Leucine-rich repeat containing protein                                                                | Leucine-rich repeat       |
| 953 | 3428 | <a href="#">NEOS13_0937</a> | peg | 3428_13166_13008 | 13166 | 13008 | - | hypothetical protein                                                                                  |                           |
| 954 | 3428 | <a href="#">NEOS13_0938</a> | peg | 3428_13344_14963 | 13344 | 14963 | + | Leucine-rich repeat containing protein                                                                | Leucine-rich repeat       |
| 955 | 3428 | <a href="#">NEOS13_0939</a> | peg | 3428_15259_15116 | 15259 | 15116 | - | hypothetical protein                                                                                  |                           |
| 956 | 3429 | <a href="#">NEOS13_0940</a> | peg | 3429_139_279     | 139   | 279   | + | hypothetical protein                                                                                  |                           |
| 957 | 3429 | <a href="#">NEOS13_0941</a> | peg | 3429_1195_503    | 1195  | 503   | - | hypothetical protein                                                                                  |                           |
| 958 | 3429 | <a href="#">NEOS13_0942</a> | peg | 3429_2503_1232   | 2503  | 1232  | - | hypothetical protein                                                                                  |                           |
| 959 | 3429 | <a href="#">NEOS13_0943</a> | peg | 3429_3731_2658   | 3731  | 2658  | - | hypothetical protein                                                                                  |                           |
| 960 | 3429 | <a href="#">NEOS13_0944</a> | peg | 3429_3964_3827   | 3964  | 3827  | - | hypothetical protein                                                                                  |                           |
| 961 | 3429 | <a href="#">NEOS13_0945</a> | peg | 3429_4086_4286   | 4086  | 4286  | + | hypothetical protein                                                                                  |                           |
| 962 | 3429 | <a href="#">NEOS13_0946</a> | peg | 3429_4570_4337   | 4570  | 4337  | - | hypothetical protein                                                                                  |                           |
| 963 | 3429 | <a href="#">NEOS13_0947</a> | peg | 3429_4826_5080   | 4826  | 5080  | + | Mobile element protein                                                                                |                           |
| 964 | 3429 | <a href="#">NEOS13_0948</a> | peg | 3429_5184_5038   | 5184  | 5038  | - | hypothetical protein                                                                                  |                           |
| 965 | 3429 | <a href="#">NEOS13_0949</a> | peg | 3429_5347_5895   | 5347  | 5895  | + | hypothetical protein                                                                                  |                           |
| 966 | 3429 | <a href="#">NEOS13_0950</a> | peg | 3429_6041_6385   | 6041  | 6385  | + | transposase family protein                                                                            | Transposase               |
| 967 | 3429 | <a href="#">NEOS13_0951</a> | peg | 3429_6460_6744   | 6460  | 6744  | + | Mobile element protein                                                                                |                           |
| 968 | 3429 | <a href="#">NEOS13_0952</a> | peg | 3429_6800_6991   | 6800  | 6991  | + | Integrase, catalytic region                                                                           |                           |
| 969 | 3429 | <a href="#">NEOS13_0953</a> | peg | 3429_6997_7170   | 6997  | 7170  | + | hypothetical protein                                                                                  |                           |
| 970 | 3430 | <a href="#">NEOS13_0954</a> | peg | 3430_130_1092    | 130   | 1092  | + | hypothetical protein                                                                                  |                           |
| 971 | 3430 | <a href="#">NEOS13_0955</a> | peg | 3430_1651_1812   | 1651  | 1812  | + | hypothetical protein                                                                                  |                           |
| 972 | 3431 | <a href="#">NEOS13_0956</a> | peg | 3431_973_815     | 973   | 815   | - | hypothetical protein                                                                                  |                           |
| 973 | 3431 | <a href="#">NEOS13_0957</a> | peg | 3431_1620_1165   | 1620  | 1165  | - | Holo-[acyl-carrier protein] synthase (EC 2.7.8.7)                                                     |                           |
| 974 | 3431 | <a href="#">NEOS13_0958</a> | peg | 3431_1678_1535   | 1678  | 1535  | - | hypothetical protein                                                                                  |                           |
| 975 | 3431 | <a href="#">NEOS13_0959</a> | peg | 3431_2065_2565   | 2065  | 2565  | + | hypothetical protein                                                                                  |                           |
| 976 | 3431 | <a href="#">NEOS13_0960</a> | peg | 3431_3068_2646   | 3068  | 2646  | - | LSU m3Psi1915 methyltransferase RlmH                                                                  |                           |
| 977 | 3431 | <a href="#">NEOS13_0961</a> | peg | 3431_3571_3116   | 3571  | 3116  | - | tmRNA-binding protein SmpB                                                                            |                           |
| 978 | 3431 | <a href="#">NEOS13_0962</a> | peg | 3431_3794_4930   | 3794  | 4930  | + | DNA polymerase III beta subunit (EC 2.7.7.7)                                                          |                           |
| 979 | 3431 | <a href="#">NEOS13_0963</a> | peg | 3431_4952_5986   | 4952  | 5986  | + | DNA recombination and repair protein RecF                                                             |                           |

|      |      |                             |     |                  |       |       |   |                                                                                                                                                                                                                      |                          |
|------|------|-----------------------------|-----|------------------|-------|-------|---|----------------------------------------------------------------------------------------------------------------------------------------------------------------------------------------------------------------------|--------------------------|
| 980  | 3431 | <a href="#">NEOS13_0964</a> | peg | 3431_7346_6015   | 7346  | 6015  | - | hypothetical protein                                                                                                                                                                                                 |                          |
| 981  | 3431 | <a href="#">NEOS13_0965</a> | peg | 3431_7496_7618   | 7496  | 7618  | + | hypothetical protein                                                                                                                                                                                                 |                          |
| 982  | 3431 | <a href="#">NEOS13_0966</a> | peg | 3431_7644_7871   | 7644  | 7871  | + | hypothetical protein                                                                                                                                                                                                 |                          |
| 983  | 3431 | <a href="#">NEOS13_0967</a> | peg | 3431_8913_7861   | 8913  | 7861  | - | Thiamin biosynthesis lipoprotein ApbE                                                                                                                                                                                |                          |
| 984  | 3431 | <a href="#">NEOS13_0968</a> | peg | 3431_9825_8935   | 9825  | 8935  | - | Methylenetetrahydrofolate dehydrogenase (NADP+) (EC 1.5.1.5) / Methyltetrahydrofolate cyclohydrolase (EC 3.5.4.9)                                                                                                    |                          |
| 985  | 3431 | <a href="#">NEOS13_0969</a> | peg | 3431_9988_9869   | 9988  | 9869  | - | hypothetical protein                                                                                                                                                                                                 |                          |
| 986  | 3431 | <a href="#">NEOS13_0970</a> | peg | 3431_10640_11188 | 10640 | 11188 | + | hypothetical protein                                                                                                                                                                                                 |                          |
| 987  | 3431 | <a href="#">NEOS13_0971</a> | peg | 3431_12996_11713 | 12996 | 11713 | - | hypothetical protein                                                                                                                                                                                                 |                          |
| 988  | 3431 | <a href="#">NEOS13_0972</a> | peg | 3431_13336_12959 | 13336 | 12959 | - | Ferredoxin, 2Fe-2S                                                                                                                                                                                                   |                          |
| 989  | 3431 | <a href="#">NEOS13_0973</a> | peg | 3431_13841_13338 | 13841 | 13338 | - | hypothetical protein                                                                                                                                                                                                 |                          |
| 990  | 3431 | <a href="#">NEOS13_0974</a> | peg | 3431_14714_14007 | 14714 | 14007 | - | Undecaprenyl-phosphate galactosephosphotransferase (EC 2.7.8.6)                                                                                                                                                      |                          |
| 991  | 3431 | <a href="#">NEOS13_0975</a> | peg | 3431_16258_15383 | 16258 | 15383 | - | Octaprenyl-diphosphate synthase (EC 2.5.1.-) / Dimethylallyltransferase (EC 2.5.1.1) / Geranyltranstransferase (farnesylidiphosphate synthase) (EC 2.5.1.10) / Geranylgeranyl pyrophosphate synthetase (EC 2.5.1.29) |                          |
| 992  | 3431 | <a href="#">NEOS13_0976</a> | peg | 3431_17667_16309 | 17667 | 16309 | - | UDP-glucose dehydrogenase (EC 1.1.1.22)                                                                                                                                                                              |                          |
| 993  | 3431 | <a href="#">NEOS13_0977</a> | peg | 3431_19936_17750 | 19936 | 17750 | - | hypothetical protein                                                                                                                                                                                                 |                          |
| 994  | 3431 | <a href="#">NEOS13_0978</a> | peg | 3431_22044_20335 | 22044 | 20335 | - | hypothetical protein                                                                                                                                                                                                 |                          |
| 995  | 3431 | <a href="#">NEOS13_0979</a> | peg | 3431_22618_22034 | 22618 | 22034 | - | Septum formation protein Maf                                                                                                                                                                                         |                          |
| 996  | 3431 | <a href="#">NEOS13_0980</a> | peg | 3431_22964_22644 | 22964 | 22644 | - | hypothetical protein                                                                                                                                                                                                 |                          |
| 997  | 3431 | <a href="#">NEOS13_0981</a> | peg | 3431_24868_23234 | 24868 | 23234 | - | hypothetical protein                                                                                                                                                                                                 | Outer_membrane_protein   |
| 998  | 3431 | <a href="#">NEOS13_0982</a> | peg | 3431_25662_25495 | 25662 | 25495 | - | hypothetical protein                                                                                                                                                                                                 |                          |
| 999  | 3431 | <a href="#">NEOS13_0983</a> | peg | 3431_26977_26126 | 26977 | 26126 | - | NAD kinase (EC 2.7.1.23)                                                                                                                                                                                             |                          |
| 1000 | 3431 | <a href="#">NEOS13_0984</a> | peg | 3431_28888_26987 | 28888 | 26987 | - | 1-deoxy-D-xylulose 5-phosphate synthase (EC 2.2.1.7)                                                                                                                                                                 |                          |
| 1001 | 3431 | <a href="#">NEOS13_0985</a> | peg | 3431_29159_28908 | 29159 | 28908 | - | Exodeoxyribonuclease VII small subunit (EC 3.1.11.6)                                                                                                                                                                 |                          |
| 1002 | 3431 | <a href="#">NEOS13_0986</a> | peg | 3431_30507_29152 | 30507 | 29152 | - | Exodeoxyribonuclease VII large subunit (EC 3.1.11.6)                                                                                                                                                                 |                          |
| 1003 | 3431 | <a href="#">NEOS13_0987</a> | peg | 3431_30879_30754 | 30879 | 30754 | - | hypothetical protein                                                                                                                                                                                                 |                          |
| 1004 | 3431 | <a href="#">NEOS13_0988</a> | peg | 3431_30851_31642 | 30851 | 31642 | + | Triosephosphate isomerase (EC 5.3.1.1)                                                                                                                                                                               | Glycolysis_Gluco-genesis |
| 1005 | 3431 | <a href="#">NEOS13_0989</a> | peg | 3431_31639_31935 | 31639 | 31935 | + | Preprotein translocase subunit SecG (TC 3.A.5.1.1)                                                                                                                                                                   |                          |
| 1006 | 3431 | <a href="#">NEOS13_0990</a> | peg | 3431_32431_31982 | 32431 | 31982 | - | hypothetical protein                                                                                                                                                                                                 |                          |
| 1007 | 3431 | <a href="#">NEOS13_0991</a> | peg | 3431_33251_32715 | 33251 | 32715 | - | Peptide deformylase (EC 3.5.1.88)                                                                                                                                                                                    |                          |
| 1008 | 3431 | <a href="#">NEOS13_0992</a> | peg | 3431_33620_33787 | 33620 | 33787 | + | hypothetical protein                                                                                                                                                                                                 |                          |
| 1009 | 3431 | <a href="#">NEOS13_0993</a> | peg | 3431_34233_34096 | 34233 | 34096 | - | hypothetical protein                                                                                                                                                                                                 |                          |
| 1010 | 3431 | <a href="#">NEOS13_0994</a> | peg | 3431_34357_34482 | 34357 | 34482 | + | hypothetical protein                                                                                                                                                                                                 |                          |
| 1011 | 3431 | <a href="#">NEOS13_0995</a> | peg | 3431_34504_34881 | 34504 | 34881 | + | hypothetical protein                                                                                                                                                                                                 |                          |
| 1012 | 3431 | <a href="#">NEOS13_0996</a> | peg | 3431_34944_35222 | 34944 | 35222 | + | hypothetical protein                                                                                                                                                                                                 |                          |
| 1013 | 3431 | <a href="#">NEOS13_0997</a> | peg | 3431_35661_35783 | 35661 | 35783 | + | hypothetical protein                                                                                                                                                                                                 |                          |
| 1014 | 3431 | <a href="#">NEOS13_0998</a> | peg | 3431_36247_39489 | 36247 | 39489 | + | hypothetical protein                                                                                                                                                                                                 |                          |
| 1015 | 3431 | <a href="#">NEOS13_0999</a> | peg | 3431_41026_39677 | 41026 | 39677 | - | Magnesium and cobalt efflux protein CorC                                                                                                                                                                             |                          |
| 1016 | 3431 | <a href="#">NEOS13_1000</a> | peg | 3431_41566_41045 | 41566 | 41045 | - | Metal-dependent hydrolase YbeY, involved in rRNA and/or ribosome maturation and assembly                                                                                                                             |                          |
| 1017 | 3431 | <a href="#">NEOS13_1001</a> | peg | 3431_41787_41629 | 41787 | 41629 | - | hypothetical protein                                                                                                                                                                                                 |                          |
| 1018 | 3431 | <a href="#">NEOS13_1002</a> | peg | 3431_41976_41803 | 41976 | 41803 | - | hypothetical protein                                                                                                                                                                                                 |                          |
| 1019 | 3431 | <a href="#">NEOS13_1003</a> | peg | 3431_42166_43650 | 42166 | 43650 | + | hypothetical protein                                                                                                                                                                                                 |                          |
| 1020 | 3431 | <a href="#">NEOS13_1004</a> | peg | 3431_43822_43706 | 43822 | 43706 | - | hypothetical protein                                                                                                                                                                                                 |                          |
| 1021 | 3431 | <a href="#">NEOS13_1005</a> | peg | 3431_44077_43949 | 44077 | 43949 | - | hypothetical protein                                                                                                                                                                                                 |                          |
| 1022 | 3431 | <a href="#">NEOS13_1006</a> | peg | 3431_44318_44178 | 44318 | 44178 | - | hypothetical protein                                                                                                                                                                                                 |                          |
| 1023 | 3431 | <a href="#">NEOS13_1007</a> | peg | 3431_44477_44914 | 44477 | 44914 | + | Mobile element protein                                                                                                                                                                                               |                          |
| 1024 | 3432 | <a href="#">NEOS13_1008</a> | peg | 3432_258_398     | 258   | 398   | + | hypothetical protein                                                                                                                                                                                                 |                          |
| 1025 | 3432 | <a href="#">NEOS13_1009</a> | peg | 3432_499_627     | 499   | 627   | + | hypothetical protein                                                                                                                                                                                                 |                          |
| 1026 | 3432 | <a href="#">NEOS13_1010</a> | peg | 3432_754_870     | 754   | 870   | + | hypothetical protein                                                                                                                                                                                                 |                          |
| 1027 | 3432 | <a href="#">NEOS13_1011</a> | peg | 3432_2410_926    | 2410  | 926   | - | hypothetical protein                                                                                                                                                                                                 |                          |
| 1028 | 3432 | <a href="#">NEOS13_1012</a> | peg | 3432_2600_2773   | 2600  | 2773  | + | hypothetical protein                                                                                                                                                                                                 |                          |
| 1029 | 3432 | <a href="#">NEOS13_1013</a> | peg | 3432_2789_2947   | 2789  | 2947  | + | hypothetical protein                                                                                                                                                                                                 |                          |
| 1030 | 3432 | <a href="#">NEOS13_1014</a> | peg | 3432_3010_3531   | 3010  | 3531  | + | Metal-dependent hydrolase YbeY, involved in rRNA and/or ribosome maturation and assembly                                                                                                                             |                          |
| 1031 | 3432 | <a href="#">NEOS13_1015</a> | peg | 3432_3550_4899   | 3550  | 4899  | + | Magnesium and cobalt efflux protein CorC                                                                                                                                                                             |                          |
| 1032 | 3432 | <a href="#">NEOS13_1016</a> | peg | 3432_8329_5087   | 8329  | 5087  | - | hypothetical protein                                                                                                                                                                                                 |                          |
| 1033 | 3432 | <a href="#">NEOS13_1017</a> | peg | 3432_8915_8793   | 8915  | 8793  | - | hypothetical protein                                                                                                                                                                                                 |                          |
| 1034 | 3432 | <a href="#">NEOS13_1018</a> | peg | 3432_9632_9354   | 9632  | 9354  | - | hypothetical protein                                                                                                                                                                                                 |                          |
| 1035 | 3432 | <a href="#">NEOS13_1019</a> | peg | 3432_10072_9695  | 10072 | 9695  | - | hypothetical protein                                                                                                                                                                                                 |                          |
| 1036 | 3432 | <a href="#">NEOS13_1020</a> | peg | 3432_10219_10094 | 10219 | 10094 | - | hypothetical protein                                                                                                                                                                                                 |                          |
| 1037 | 3432 | <a href="#">NEOS13_1021</a> | peg | 3432_10343_10480 | 10343 | 10480 | + | hypothetical protein                                                                                                                                                                                                 |                          |
| 1038 | 3432 | <a href="#">NEOS13_1022</a> | peg | 3432_10956_10789 | 10956 | 10789 | - | hypothetical protein                                                                                                                                                                                                 |                          |
| 1039 | 3432 | <a href="#">NEOS13_1023</a> | peg | 3432_11325_11861 | 11325 | 11861 | + | Peptide deformylase (EC 3.5.1.88)                                                                                                                                                                                    |                          |
| 1040 | 3432 | <a href="#">NEOS13_1024</a> | peg | 3432_12145_12594 | 12145 | 12594 | + | hypothetical protein                                                                                                                                                                                                 |                          |
| 1041 | 3432 | <a href="#">NEOS13_1025</a> | peg | 3432_12937_12641 | 12937 | 12641 | - | Preprotein translocase subunit SecG (TC 3.A.5.1.1)                                                                                                                                                                   |                          |
| 1042 | 3432 | <a href="#">NEOS13_1026</a> | peg | 3432_13725_12934 | 13725 | 12934 | - | Triosephosphate isomerase (EC 5.3.1.1)                                                                                                                                                                               | Glycolysis_Gluco-genesis |
| 1043 | 3432 | <a href="#">NEOS13_1027</a> | peg | 3432_13697_13822 | 13697 | 13822 | + | hypothetical protein                                                                                                                                                                                                 |                          |
| 1044 | 3432 | <a href="#">NEOS13_1028</a> | peg | 3432_14069_15424 | 14069 | 15424 | + | Exodeoxyribonuclease VII large subunit (EC 3.1.11.6)                                                                                                                                                                 |                          |

|      |      |                             |     |                  |       |       |   |                                                                                                                                                                                                                 |                           |
|------|------|-----------------------------|-----|------------------|-------|-------|---|-----------------------------------------------------------------------------------------------------------------------------------------------------------------------------------------------------------------|---------------------------|
| 1045 | 3432 | <a href="#">NEOS13_1029</a> | peg | 3432_15417_15668 | 15417 | 15668 | + | Exodeoxyribonuclease VII small subunit (EC 3.1.11.6)                                                                                                                                                            |                           |
| 1046 | 3432 | <a href="#">NEOS13_1030</a> | peg | 3432_15688_17589 | 15688 | 17589 | + | 1-deoxy-D-xylulose 5-phosphate synthase (EC 2.2.1.7)                                                                                                                                                            |                           |
| 1047 | 3432 | <a href="#">NEOS13_1031</a> | peg | 3432_17599_18450 | 17599 | 18450 | + | NAD kinase (EC 2.7.1.23)                                                                                                                                                                                        |                           |
| 1048 | 3432 | <a href="#">NEOS13_1032</a> | peg | 3432_18914_19081 | 18914 | 19081 | + | hypothetical protein                                                                                                                                                                                            |                           |
| 1049 | 3432 | <a href="#">NEOS13_1033</a> | peg | 3432_19708_21342 | 19708 | 21342 | + | hypothetical protein                                                                                                                                                                                            | Outer_membrane_protein    |
| 1050 | 3432 | <a href="#">NEOS13_1034</a> | peg | 3432_21612_21932 | 21612 | 21932 | + | hypothetical protein                                                                                                                                                                                            |                           |
| 1051 | 3432 | <a href="#">NEOS13_1035</a> | peg | 3432_21958_22542 | 21958 | 22542 | + | Septum formation protein Maf                                                                                                                                                                                    |                           |
| 1052 | 3432 | <a href="#">NEOS13_1036</a> | peg | 3432_22532_24241 | 22532 | 24241 | + | hypothetical protein                                                                                                                                                                                            |                           |
| 1053 | 3432 | <a href="#">NEOS13_1037</a> | peg | 3432_24640_26826 | 24640 | 26826 | + | hypothetical protein                                                                                                                                                                                            |                           |
| 1054 | 3432 | <a href="#">NEOS13_1038</a> | peg | 3432_26909_28267 | 26909 | 28267 | + | UDP-glucose dehydrogenase (EC 1.1.1.22)                                                                                                                                                                         |                           |
| 1055 | 3432 | <a href="#">NEOS13_1039</a> | peg | 3432_28318_29193 | 28318 | 29193 | + | Octaprenyl-diphosphate synthase (EC 2.5.1.-) / Dimethylallyltransferase (EC 2.5.1.1) / Geranyltransferase (farnesyl diphosphate synthase) (EC 2.5.1.10) / Geranylgeranyl pyrophosphate synthetase (EC 2.5.1.29) |                           |
| 1056 | 3432 | <a href="#">NEOS13_1040</a> | peg | 3432_29862_30569 | 29862 | 30569 | + | Undecaprenyl-phosphate galactosephosphotransferase (EC 2.7.8.6)                                                                                                                                                 |                           |
| 1057 | 3432 | <a href="#">NEOS13_1041</a> | peg | 3432_30735_31238 | 30735 | 31238 | + | hypothetical protein                                                                                                                                                                                            |                           |
| 1058 | 3432 | <a href="#">NEOS13_1042</a> | peg | 3432_31240_31617 | 31240 | 31617 | + | Ferredoxin, 2Fe-2S                                                                                                                                                                                              |                           |
| 1059 | 3432 | <a href="#">NEOS13_1043</a> | peg | 3432_31580_32863 | 31580 | 32863 | + | ATPase, AAA family protein                                                                                                                                                                                      |                           |
| 1060 | 3432 | <a href="#">NEOS13_1044</a> | peg | 3432_33936_33388 | 33936 | 33388 | - | hypothetical protein                                                                                                                                                                                            |                           |
| 1061 | 3432 | <a href="#">NEOS13_1045</a> | peg | 3432_34588_34707 | 34588 | 34707 | + | hypothetical protein                                                                                                                                                                                            |                           |
| 1062 | 3432 | <a href="#">NEOS13_1046</a> | peg | 3432_34751_35641 | 34751 | 35641 | + | Methylenetetrahydrofolate dehydrogenase (NADP+) (EC 1.5.1.5) / Methylenetetrahydrofolate cyclohydrolase (EC 3.5.4.9)                                                                                            |                           |
| 1063 | 3432 | <a href="#">NEOS13_1047</a> | peg | 3432_35663_36715 | 35663 | 36715 | + | Thiamin biosynthesis lipoprotein ApbE                                                                                                                                                                           |                           |
| 1064 | 3432 | <a href="#">NEOS13_1048</a> | peg | 3432_36932_36705 | 36932 | 36705 | - | hypothetical protein                                                                                                                                                                                            |                           |
| 1065 | 3432 | <a href="#">NEOS13_1049</a> | peg | 3432_37080_36958 | 37080 | 36958 | - | hypothetical protein                                                                                                                                                                                            |                           |
| 1066 | 3432 | <a href="#">NEOS13_1050</a> | peg | 3432_37230_38561 | 37230 | 38561 | + | hypothetical protein                                                                                                                                                                                            |                           |
| 1067 | 3432 | <a href="#">NEOS13_1051</a> | peg | 3432_39624_38590 | 39624 | 38590 | - | DNA recombination and repair protein RecF                                                                                                                                                                       |                           |
| 1068 | 3432 | <a href="#">NEOS13_1052</a> | peg | 3432_40782_39646 | 40782 | 39646 | - | DNA polymerase III beta subunit (EC 2.7.7.7)                                                                                                                                                                    |                           |
| 1069 | 3432 | <a href="#">NEOS13_1053</a> | peg | 3432_41005_41460 | 41005 | 41460 | + | tmRNA-binding protein SmpB                                                                                                                                                                                      |                           |
| 1070 | 3432 | <a href="#">NEOS13_1054</a> | peg | 3432_41508_41930 | 41508 | 41930 | + | LSU m3Psi1915 methyltransferase RlmH                                                                                                                                                                            |                           |
| 1071 | 3432 | <a href="#">NEOS13_1055</a> | peg | 3432_42511_42011 | 42511 | 42011 | - | hypothetical protein                                                                                                                                                                                            |                           |
| 1072 | 3432 | <a href="#">NEOS13_1056</a> | peg | 3432_42898_43041 | 42898 | 43041 | + | hypothetical protein                                                                                                                                                                                            |                           |
| 1073 | 3432 | <a href="#">NEOS13_1057</a> | peg | 3432_42956_43411 | 42956 | 43411 | + | Holo-[acyl-carrier protein] synthase (EC 2.7.8.7)                                                                                                                                                               |                           |
| 1074 | 3432 | <a href="#">NEOS13_1058</a> | peg | 3432_43603_43761 | 43603 | 43761 | + | hypothetical protein                                                                                                                                                                                            |                           |
| 1075 | 3433 | <a href="#">NEOS13_1059</a> | peg | 3433_638_78      | 638   | 78    | - | Leucine-rich repeat containing protein                                                                                                                                                                          | Leucine-rich repeat       |
| 1076 | 3434 | <a href="#">NEOS13_1060</a> | peg | 3434_1458_1273   | 1458  | 1273  | - | hypothetical protein                                                                                                                                                                                            |                           |
| 1077 | 3435 | <a href="#">NEOS13_1061</a> | peg | 3435_1331_138    | 1331  | 138   | - | Leucine-rich repeat containing protein                                                                                                                                                                          | Leucine-rich repeat       |
| 1078 | 3436 | <a href="#">NEOS13_1062</a> | peg | 3436_1838_138    | 1838  | 138   | - | Leucine-rich repeat containing protein                                                                                                                                                                          | Leucine-rich repeat       |
| 1079 | 3436 | <a href="#">NEOS13_1063</a> | peg | 3436_3384_2326   | 3384  | 2326  | - | Leucine-rich repeat containing protein                                                                                                                                                                          | Leucine-rich repeat       |
| 1080 | 3437 | <a href="#">NEOS13_1064</a> | peg | 3437_1215_952    | 1215  | 952   | - | Leucine-rich repeat containing protein                                                                                                                                                                          | Leucine-rich repeat       |
| 1081 | 3438 | <a href="#">NEOS13_1065</a> | peg | 3438_2374_1025   | 2374  | 1025  | - | Leucine-rich repeat containing protein                                                                                                                                                                          | Leucine-rich repeat       |
| 1082 | 3439 | <a href="#">NEOS13_1066</a> | peg | 3439_193_327     | 193   | 327   | + | hypothetical protein                                                                                                                                                                                            |                           |
| 1083 | 3439 | <a href="#">NEOS13_1067</a> | peg | 3439_561_448     | 561   | 448   | - | hypothetical protein                                                                                                                                                                                            |                           |
| 1084 | 3439 | <a href="#">NEOS13_1068</a> | peg | 3439_908_735     | 908   | 735   | - | Mobile element protein                                                                                                                                                                                          |                           |
| 1085 | 3439 | <a href="#">NEOS13_1069</a> | peg | 3439_1381_944    | 1381  | 944   | - | Mobile element protein                                                                                                                                                                                          |                           |
| 1086 | 3440 | <a href="#">NEOS13_1070</a> | peg | 3440_229_438     | 229   | 438   | + | hypothetical protein                                                                                                                                                                                            |                           |
| 1087 | 3440 | <a href="#">NEOS13_1071</a> | peg | 3440_539_748     | 539   | 748   | + | hypothetical protein                                                                                                                                                                                            |                           |
| 1088 | 3440 | <a href="#">NEOS13_1072</a> | peg | 3440_2540_1467   | 2540  | 1467  | - | dTDP-glucose 4,6-dehydratase (EC 4.2.1.46)                                                                                                                                                                      |                           |
| 1089 | 3440 | <a href="#">NEOS13_1073</a> | peg | 3440_3430_2537   | 3430  | 2537  | - | Glucose-1-phosphate thymidyltransferase (EC 2.7.7.24)                                                                                                                                                           |                           |
| 1090 | 3440 | <a href="#">NEOS13_1074</a> | peg | 3440_3728_5374   | 3728  | 5374  | + | Thymidylate synthase thyX (EC 2.1.1.-)                                                                                                                                                                          |                           |
| 1091 | 3440 | <a href="#">NEOS13_1075</a> | peg | 3440_5850_7067   | 5850  | 7067  | + | Tyrosine-specific transport protein                                                                                                                                                                             |                           |
| 1092 | 3440 | <a href="#">NEOS13_1076</a> | peg | 3440_7152_8309   | 7152  | 8309  | + | Tyrosine-specific transport protein                                                                                                                                                                             |                           |
| 1093 | 3440 | <a href="#">NEOS13_1077</a> | peg | 3440_8322_9404   | 8322  | 9404  | + | Tryptophanyl-tRNA synthetase (EC 6.1.1.2)                                                                                                                                                                       |                           |
| 1094 | 3440 | <a href="#">NEOS13_1078</a> | peg | 3440_9972_9850   | 9972  | 9850  | - | hypothetical protein                                                                                                                                                                                            |                           |
| 1095 | 3440 | <a href="#">NEOS13_1079</a> | peg | 3440_10027_12021 | 10027 | 12021 | + | Excinuclease ABC subunit B                                                                                                                                                                                      | ABC transporter           |
| 1096 | 3440 | <a href="#">NEOS13_1080</a> | peg | 3440_12632_12841 | 12632 | 12841 | + | conserved hypothetical protein                                                                                                                                                                                  |                           |
| 1097 | 3440 | <a href="#">NEOS13_1081</a> | peg | 3440_13343_14686 | 13343 | 14686 | + | Mobile element protein                                                                                                                                                                                          |                           |
| 1098 | 3441 | <a href="#">NEOS13_1082</a> | peg | 3441_6326_609    | 6326  | 609   | - | hypothetical protein                                                                                                                                                                                            |                           |
| 1099 | 3441 | <a href="#">NEOS13_1083</a> | peg | 3441_7079_9841   | 7079  | 9841  | + | hypothetical protein                                                                                                                                                                                            |                           |
| 1100 | 3441 | <a href="#">NEOS13_1084</a> | peg | 3441_13004_10488 | 13004 | 10488 | - | Leucyl-tRNA synthetase (EC 6.1.1.4)                                                                                                                                                                             |                           |
| 1101 | 3441 | <a href="#">NEOS13_1085</a> | peg | 3441_13061_15373 | 13061 | 15373 | + | 3'-to-5' exoribonuclease RNase R                                                                                                                                                                                |                           |
| 1102 | 3441 | <a href="#">NEOS13_1086</a> | peg | 3441_15373_15957 | 15373 | 15957 | + | DNA-3-methyladenine glycosylase II (EC 3.2.2.21)                                                                                                                                                                |                           |
| 1103 | 3441 | <a href="#">NEOS13_1087</a> | peg | 3441_16069_16740 | 16069 | 16740 | + | hypothetical protein                                                                                                                                                                                            |                           |
| 1104 | 3441 | <a href="#">NEOS13_1088</a> | peg | 3441_16737_17396 | 16737 | 17396 | + | hypothetical protein                                                                                                                                                                                            |                           |
| 1105 | 3441 | <a href="#">NEOS13_1089</a> | peg | 3441_17383_17811 | 17383 | 17811 | + | hypothetical protein                                                                                                                                                                                            |                           |
| 1106 | 3441 | <a href="#">NEOS13_1090</a> | peg | 3441_18119_17874 | 18119 | 17874 | - | hypothetical protein                                                                                                                                                                                            |                           |
| 1107 | 3441 | <a href="#">NEOS13_1091</a> | peg | 3441_19404_19285 | 19404 | 19285 | - | hypothetical protein                                                                                                                                                                                            |                           |
| 1108 | 3441 | <a href="#">NEOS13_1092</a> | peg | 3441_19740_20267 | 19740 | 20267 | + | putative NADH-ubiquinone oxidoreductase chain C/D                                                                                                                                                               | Oxidative_Phosphorylation |
| 1109 | 3441 | <a href="#">NEOS13_1093</a> | peg | 3441_20949_20458 | 20949 | 20458 | - | transposase                                                                                                                                                                                                     | Transposase               |

|      |      |                                    |     |                  |       |       |   |                                                                   |                                  |
|------|------|------------------------------------|-----|------------------|-------|-------|---|-------------------------------------------------------------------|----------------------------------|
| 1110 | 3441 | <a href="#">NEOS13_1094</a>        | peg | 3441_21356_21060 | 21356 | 21060 | - | Transposase                                                       | Transposase                      |
| 1111 | 3441 | <a href="#">NEOS13_1095</a>        | peg | 3441_21532_22947 | 21532 | 22947 | + | hypothetical protein                                              |                                  |
| 1112 | 3441 | <a href="#">NEOS13_1096</a>        | peg | 3441_23273_23157 | 23273 | 23157 | - | hypothetical protein                                              |                                  |
| 1113 | 3441 | <a href="#">NEOS13_1097</a>        | peg | 3441_23603_23469 | 23603 | 23469 | - | hypothetical protein                                              |                                  |
| 1114 | 3441 | <a href="#">NEOS13_1098</a>        | peg | 3441_25637_24063 | 25637 | 24063 | - | peptidase C26                                                     |                                  |
| 1115 | 3441 | <a href="#">NEOS13_1099</a>        | peg | 3441_26836_26096 | 26836 | 26096 | - | hypothetical protein                                              |                                  |
| 1116 | 3441 | <a href="#">NEOS13_1100</a>        | peg | 3441_28547_28684 | 28547 | 28684 | + | hypothetical protein                                              |                                  |
| 1117 | 3441 | <a href="#">NEOS13_1101</a>        | peg | 3441_28881_29108 | 28881 | 29108 | + | hypothetical protein                                              |                                  |
| 1118 | 3441 | <a href="#">NEOS13_1102</a>        | peg | 3441_29120_29422 | 29120 | 29422 | + | hypothetical protein                                              |                                  |
| 1119 | 3441 | <a href="#">NEOS13_1103</a>        | peg | 3441_29878_30054 | 29878 | 30054 | + | hypothetical protein                                              |                                  |
| 1120 | 3441 | <a href="#">NEOS13_0017m<br/>a</a> | rna | 3441_30549_30478 | 30549 | 30478 | - | tRNA-Asn-GTT                                                      | RNA                              |
| 1121 | 3441 | <a href="#">NEOS13_1104</a>        | peg | 3441_32252_30627 | 32252 | 30627 | - | Heat shock protein 60 family chaperone GroEL                      |                                  |
| 1122 | 3441 | <a href="#">NEOS13_1105</a>        | peg | 3441_32603_32277 | 32603 | 32277 | - | Heat shock protein 60 family co-chaperone GroES                   |                                  |
| 1123 | 3441 | <a href="#">NEOS13_1106</a>        | peg | 3441_34571_32727 | 34571 | 32727 | - | Oligoendopeptidase F                                              |                                  |
| 1124 | 3441 | <a href="#">NEOS13_1107</a>        | peg | 3441_37211_35562 | 37211 | 35562 | - | hypothetical protein                                              |                                  |
| 1125 | 3441 | <a href="#">NEOS13_1108</a>        | peg | 3441_37510_37397 | 37510 | 37397 | - | hypothetical protein                                              |                                  |
| 1126 | 3441 | <a href="#">NEOS13_1109</a>        | peg | 3441_39363_37786 | 39363 | 37786 | - | hypothetical protein                                              |                                  |
| 1127 | 3441 | <a href="#">NEOS13_1110</a>        | peg | 3441_39661_39476 | 39661 | 39476 | - | hypothetical protein                                              |                                  |
| 1128 | 3441 | <a href="#">NEOS13_1111</a>        | peg | 3441_40305_40421 | 40305 | 40421 | + | hypothetical protein                                              |                                  |
| 1129 | 3441 | <a href="#">NEOS13_1112</a>        | peg | 3441_40850_40434 | 40850 | 40434 | - | FIG00494004: hypothetical protein                                 |                                  |
| 1130 | 3441 | <a href="#">NEOS13_1113</a>        | peg | 3441_41785_41078 | 41785 | 41078 | - | Ribose 5-phosphate isomerase A (EC 5.3.1.6)                       | Pentose_phosphate_pathway        |
| 1131 | 3441 | <a href="#">NEOS13_1114</a>        | peg | 3441_41827_42582 | 41827 | 42582 | + | FIG137478: Hypothetical protein Ybgl                              |                                  |
| 1132 | 3441 | <a href="#">NEOS13_1115</a>        | peg | 3441_42780_42896 | 42780 | 42896 | + | hypothetical protein                                              |                                  |
| 1133 | 3441 | <a href="#">NEOS13_1116</a>        | peg | 3441_43183_44457 | 43183 | 44457 | + | Tyrosyl-tRNA synthetase (EC 6.1.1.1)                              |                                  |
| 1134 | 3441 | <a href="#">NEOS13_1117</a>        | peg | 3441_44690_45007 | 44690 | 45007 | + | Integration host factor alpha/beta                                |                                  |
| 1135 | 3441 | <a href="#">NEOS13_1118</a>        | peg | 3441_45296_46381 | 45296 | 46381 | + | FIG00899523: hypothetical protein                                 |                                  |
| 1136 | 3441 | <a href="#">NEOS13_1119</a>        | peg | 3441_46458_47417 | 46458 | 47417 | + | Acetyl-coenzyme A carboxyl transferase alpha chain (EC 6.4.1.2)   | Fatty_acid_initiation_elongation |
| 1137 | 3441 | <a href="#">NEOS13_1120</a>        | peg | 3441_47610_49529 | 47610 | 49529 | + | Lipid A export ATP-binding/permease protein MsbA (EC 3.6.3.25)    |                                  |
| 1138 | 3441 | <a href="#">NEOS13_1121</a>        | peg | 3441_49510_50226 | 49510 | 50226 | + | Queuosine Biosynthesis QueC ATPase                                |                                  |
| 1139 | 3441 | <a href="#">NEOS13_1122</a>        | peg | 3441_50819_50535 | 50819 | 50535 | - | hypothetical protein                                              |                                  |
| 1140 | 3441 | <a href="#">NEOS13_1123</a>        | peg | 3441_51381_51004 | 51381 | 51004 | - | hypothetical protein                                              |                                  |
| 1141 | 3441 | <a href="#">NEOS13_1124</a>        | peg | 3441_52146_54074 | 52146 | 54074 | + | hypothetical protein                                              |                                  |
| 1142 | 3441 | <a href="#">NEOS13_1125</a>        | peg | 3441_55295_55170 | 55295 | 55170 | - | hypothetical protein                                              |                                  |
| 1143 | 3441 | <a href="#">NEOS13_1126</a>        | peg | 3441_55257_55379 | 55257 | 55379 | + | hypothetical protein                                              |                                  |
| 1144 | 3441 | <a href="#">NEOS13_1127</a>        | peg | 3441_55857_55354 | 55857 | 55354 | - | Mobile element protein                                            |                                  |
| 1145 | 3441 | <a href="#">NEOS13_1128</a>        | peg | 3441_56911_56090 | 56911 | 56090 | - | Nucleoside-diphosphate-sugar epimerases                           |                                  |
| 1146 | 3441 | <a href="#">NEOS13_1129</a>        | peg | 3441_57618_56926 | 57618 | 56926 | - | DNA polymerase III epsilon subunit (EC 2.7.7.7)                   |                                  |
| 1147 | 3441 | <a href="#">NEOS13_1130</a>        | peg | 3441_58371_57901 | 58371 | 57901 | - | hypothetical protein                                              |                                  |
| 1148 | 3441 | <a href="#">NEOS13_1131</a>        | peg | 3441_58565_58389 | 58565 | 58389 | - | hypothetical protein                                              |                                  |
| 1149 | 3441 | <a href="#">NEOS13_1132</a>        | peg | 3441_59470_58844 | 59470 | 58844 | - | hypothetical protein                                              |                                  |
| 1150 | 3441 | <a href="#">NEOS13_1133</a>        | peg | 3441_59533_60213 | 59533 | 60213 | + | hypothetical protein                                              |                                  |
| 1151 | 3441 | <a href="#">NEOS13_1134</a>        | peg | 3441_60215_60985 | 60215 | 60985 | + | hypothetical protein                                              |                                  |
| 1152 | 3441 | <a href="#">NEOS13_1135</a>        | peg | 3441_60992_63220 | 60992 | 63220 | + | Helicase PriA essential for oriC/DnaA-independent DNA replication |                                  |
| 1153 | 3441 | <a href="#">NEOS13_1136</a>        | peg | 3441_64419_63313 | 64419 | 63313 | - | hypothetical protein                                              |                                  |
| 1154 | 3441 | <a href="#">NEOS13_1137</a>        | peg | 3441_65228_66718 | 65228 | 66718 | + | Ribosomal protein S12p Asp88 (E. coli) methylthiotransferase      |                                  |
| 1155 | 3441 | <a href="#">NEOS13_1138</a>        | peg | 3441_67216_68835 | 67216 | 68835 | + | Lysyl-tRNA synthetase (class II) (EC 6.1.1.6)                     |                                  |
| 1156 | 3441 | <a href="#">NEOS13_1139</a>        | peg | 3441_69064_68948 | 69064 | 68948 | - | hypothetical protein                                              |                                  |
| 1157 | 3441 | <a href="#">NEOS13_1140</a>        | peg | 3441_69311_75283 | 69311 | 75283 | + | hypothetical protein                                              |                                  |
| 1158 | 3441 | <a href="#">NEOS13_1141</a>        | peg | 3441_75917_75666 | 75917 | 75666 | - | hypothetical protein                                              |                                  |
| 1159 | 3441 | <a href="#">NEOS13_1142</a>        | peg | 3441_77373_75925 | 77373 | 75925 | - | Cysteinyl-tRNA synthetase (EC 6.1.1.16)                           |                                  |
| 1160 | 3441 | <a href="#">NEOS13_1143</a>        | peg | 3441_80195_77463 | 80195 | 77463 | - | Long-chain-fatty-acid--CoA ligase (EC 6.2.1.3)                    |                                  |
| 1161 | 3441 | <a href="#">NEOS13_1144</a>        | peg | 3441_80687_81232 | 80687 | 81232 | + | Substrate-specific component BioY of biotin ECF transporter       |                                  |
| 1162 | 3441 | <a href="#">NEOS13_1145</a>        | peg | 3441_82836_81661 | 82836 | 81661 | - | hypothetical protein                                              |                                  |
| 1163 | 3441 | <a href="#">NEOS13_1146</a>        | peg | 3441_84146_83529 | 84146 | 83529 | - | OmpA/MotB domain protein                                          | Outer_membrane_protein           |
| 1164 | 3441 | <a href="#">NEOS13_1147</a>        | peg | 3441_84544_84750 | 84544 | 84750 | + | hypothetical protein                                              |                                  |
| 1165 | 3441 | <a href="#">NEOS13_1148</a>        | peg | 3441_86209_85613 | 86209 | 85613 | - | NADPH:quinone oxidoreductase                                      |                                  |
| 1166 | 3441 | <a href="#">NEOS13_1149</a>        | peg | 3441_86877_86320 | 86877 | 86320 | - | hypothetical protein                                              |                                  |
| 1167 | 3441 | <a href="#">NEOS13_1150</a>        | peg | 3441_86839_87018 | 86839 | 87018 | + | hypothetical protein                                              |                                  |
| 1168 | 3441 | <a href="#">NEOS13_1151</a>        | peg | 3441_87470_87676 | 87470 | 87676 | + | hypothetical protein                                              |                                  |
| 1169 | 3441 | <a href="#">NEOS13_1152</a>        | peg | 3441_87922_88434 | 87922 | 88434 | + | hypothetical protein                                              |                                  |
| 1170 | 3441 | <a href="#">NEOS13_1153</a>        | peg | 3441_89427_88903 | 89427 | 88903 | - | hypothetical protein                                              |                                  |
| 1171 | 3444 | <a href="#">NEOS13_1154</a>        | peg | 3444_2126_780    | 2126  | 780   | - | hypothetical protein                                              |                                  |
| 1172 | 3444 | <a href="#">NEOS13_1155</a>        | peg | 3444_3910_2123   | 3910  | 2123  | - | Phosphoenolpyruvate carboxykinase [GTP] (EC 4.1.1.32)             | TCA                              |
| 1173 | 3444 | <a href="#">NEOS13_1156</a>        | peg | 3444_5299_4208   | 5299  | 4208  | - | Rod shape-determining protein MreB                                |                                  |
| 1174 | 3444 | <a href="#">NEOS13_1157</a>        | peg | 3444_8804_5319   | 8804  | 5319  | - | FIG00899436: hypothetical protein                                 |                                  |
| 1175 | 3444 | <a href="#">NEOS13_0018m<br/>a</a> | rna | 3444_9592_9663   | 9592  | 9663  | + | tRNA-Gly-GCC                                                      | RNA                              |
| 1176 | 3444 | <a href="#">NEOS13_0019m<br/>a</a> | rna | 3444_9697_9768   | 9697  | 9768  | + | tRNA-Gly-GCC                                                      | RNA                              |
| 1177 | 3444 | <a href="#">NEOS13_1158</a>        | peg | 3444_9881_11215  | 9881  | 11215 | + | Cell division trigger factor (EC 5.2.1.8)                         |                                  |
| 1178 | 3444 | <a href="#">NEOS13_1159</a>        | peg | 3444_11279_11884 | 11279 | 11884 | + | ATP-dependent Clp protease proteolytic subunit (EC 3.4.21.92)     |                                  |

|      |      |                               |     |                  |       |       |   |                                                                                                                                                                                                                 |                                  |
|------|------|-------------------------------|-----|------------------|-------|-------|---|-----------------------------------------------------------------------------------------------------------------------------------------------------------------------------------------------------------------|----------------------------------|
| 1179 | 3444 | <a href="#">NEOS13_1160</a>   | peg | 3444_11902_13158 | 11902 | 13158 | + | ATP-dependent Clp protease ATP-binding subunit ClpX                                                                                                                                                             |                                  |
| 1180 | 3444 | <a href="#">NEOS13_1161</a>   | peg | 3444_13283_14203 | 13283 | 14203 | + | COG0454: Histone acetyltransferase HPA2 and related acetyltransferases                                                                                                                                          |                                  |
| 1181 | 3444 | <a href="#">NEOS13_1162</a>   | peg | 3444_14311_14442 | 14311 | 14442 | + | hypothetical protein                                                                                                                                                                                            |                                  |
| 1182 | 3444 | <a href="#">NEOS13_1163</a>   | peg | 3444_14785_14663 | 14785 | 14663 | - | hypothetical protein                                                                                                                                                                                            |                                  |
| 1183 | 3444 | <a href="#">NEOS13_1164</a>   | peg | 3444_14875_17622 | 14875 | 17622 | + | hypothetical protein                                                                                                                                                                                            |                                  |
| 1184 | 3444 | <a href="#">NEOS13_1165</a>   | peg | 3444_17802_19136 | 17802 | 19136 | + | hypothetical protein                                                                                                                                                                                            |                                  |
| 1185 | 3444 | <a href="#">NEOS13_1166</a>   | peg | 3444_19280_20608 | 19280 | 20608 | + | hypothetical protein                                                                                                                                                                                            |                                  |
| 1186 | 3444 | <a href="#">NEOS13_1167</a>   | peg | 3444_20640_21194 | 20640 | 21194 | + | putative low calcium response protein H                                                                                                                                                                         | T3ST1                            |
| 1187 | 3444 | <a href="#">NEOS13_1168</a>   | peg | 3444_21353_21979 | 21353 | 21979 | + | putative low calcium response protein H                                                                                                                                                                         | T3ST1                            |
| 1188 | 3444 | <a href="#">NEOS13_1169</a>   | peg | 3444_21983_22669 | 21983 | 22669 | + | hypothetical protein                                                                                                                                                                                            | T3ST1                            |
| 1189 | 3444 | <a href="#">NEOS13_1170</a>   | peg | 3444_22666_23628 | 22666 | 23628 | + | hypothetical protein                                                                                                                                                                                            |                                  |
| 1190 | 3444 | <a href="#">NEOS13_1171</a>   | peg | 3444_23674_24909 | 23674 | 24909 | + | hypothetical protein                                                                                                                                                                                            |                                  |
| 1191 | 3444 | <a href="#">NEOS13_1172</a>   | peg | 3444_24954_25130 | 24954 | 25130 | + | hypothetical protein                                                                                                                                                                                            |                                  |
| 1192 | 3444 | <a href="#">NEOS13_1173</a>   | peg | 3444_25203_27680 | 25203 | 27680 | + | hypothetical protein                                                                                                                                                                                            |                                  |
| 1193 | 3445 | <a href="#">NEOS13_1174</a>   | peg | 3445_1274_1714   | 1274  | 1714  | + | hypothetical protein                                                                                                                                                                                            |                                  |
| 1194 | 3445 | <a href="#">NEOS13_1175</a>   | peg | 3445_1931_2359   | 1931  | 2359  | + | hypothetical protein                                                                                                                                                                                            |                                  |
| 1195 | 3445 | <a href="#">NEOS13_1176</a>   | peg | 3445_2377_2496   | 2377  | 2496  | + | hypothetical protein                                                                                                                                                                                            |                                  |
| 1196 | 3445 | <a href="#">NEOS13_1177</a>   | peg | 3445_2579_5308   | 2579  | 5308  | + | hypothetical protein                                                                                                                                                                                            |                                  |
| 1197 | 3446 | <a href="#">NEOS13_1178</a>   | peg | 3446_770_594     | 770   | 594   | - | hypothetical protein                                                                                                                                                                                            |                                  |
| 1198 | 3446 | <a href="#">NEOS13_1179</a>   | peg | 3446_886_1029    | 886   | 1029  | + | hypothetical protein                                                                                                                                                                                            |                                  |
| 1199 | 3447 | <a href="#">NEOS13_1180</a>   | peg | 3447_89_343      | 89    | 343   | + | Leucine-rich repeat containing protein                                                                                                                                                                          | Leucine-rich repeat              |
| 1200 | 3447 | <a href="#">NEOS13_1181</a>   | peg | 3447_931_2757    | 931   | 2757  | + | Leucine-rich repeat containing protein                                                                                                                                                                          | Leucine-rich repeat              |
| 1201 | 3448 | <a href="#">NEOS13_1182</a>   | peg | 3448_2417_693    | 2417  | 693   | - | Leucine-rich repeat containing protein                                                                                                                                                                          | Leucine-rich repeat              |
| 1202 | 3450 | <a href="#">NEOS13_1183</a>   | peg | 3450_40_687      | 40    | 687   | + | Leucine-rich repeat containing protein                                                                                                                                                                          | Leucine-rich repeat              |
| 1203 | 3450 | <a href="#">NEOS13_1184</a>   | peg | 3450_899_3346    | 899   | 3346  | + | Leucine-rich repeat containing protein                                                                                                                                                                          | Leucine-rich repeat              |
| 1204 | 3450 | <a href="#">NEOS13_1185</a>   | peg | 3450_3629_3949   | 3629  | 3949  | + | Leucine-rich repeat containing protein                                                                                                                                                                          | Leucine-rich repeat              |
| 1205 | 3450 | <a href="#">NEOS13_1186</a>   | peg | 3450_4005_4907   | 4005  | 4907  | + | Leucine-rich repeat containing protein                                                                                                                                                                          | Leucine-rich repeat              |
| 1206 | 3450 | <a href="#">NEOS13_1187</a>   | peg | 3450_5126_4941   | 5126  | 4941  | - | hypothetical protein                                                                                                                                                                                            |                                  |
| 1207 | 3450 | <a href="#">NEOS13_1188</a>   | peg | 3450_5967_5107   | 5967  | 5107  | - | hypothetical protein                                                                                                                                                                                            |                                  |
| 1208 | 3450 | <a href="#">NEOS13_1189</a>   | peg | 3450_6920_5967   | 6920  | 5967  | - | Thioredoxin reductase (EC 1.8.1.9)                                                                                                                                                                              |                                  |
| 1209 | 3450 | <a href="#">NEOS13_1190</a>   | peg | 3450_7193_7459   | 7193  | 7459  | + | hypothetical protein                                                                                                                                                                                            |                                  |
| 1210 | 3450 | <a href="#">NEOS13_1191</a>   | peg | 3450_8365_7577   | 8365  | 7577  | - | hypothetical protein                                                                                                                                                                                            |                                  |
| 1211 | 3450 | <a href="#">NEOS13_1192</a>   | peg | 3450_9988_8396   | 9988  | 8396  | - | hypothetical protein                                                                                                                                                                                            |                                  |
| 1212 | 3450 | <a href="#">NEOS13_1193</a>   | peg | 3450_10700_12955 | 10700 | 12955 | + | putative bumetanide-sensitive Na-K-Cl                                                                                                                                                                           |                                  |
| 1213 | 3450 | <a href="#">NEOS13_1194</a>   | peg | 3450_13179_14678 | 13179 | 14678 | + | Proline/sodium symporter PutP (TC 2.A.21.2.1) @ Propionate/sodium symporter                                                                                                                                     |                                  |
| 1214 | 3450 | <a href="#">NEOS13_1195</a>   | peg | 3450_18459_14989 | 18459 | 14989 | - | hypothetical protein                                                                                                                                                                                            |                                  |
| 1215 | 3450 | <a href="#">NEOS13_1196</a>   | peg | 3450_18647_18841 | 18647 | 18841 | + | hypothetical protein                                                                                                                                                                                            |                                  |
| 1216 | 3450 | <a href="#">NEOS13_1197</a>   | peg | 3450_20047_19808 | 20047 | 19808 | - | Acyl carrier protein                                                                                                                                                                                            |                                  |
| 1217 | 3450 | <a href="#">NEOS13_1198</a>   | peg | 3450_20870_20130 | 20870 | 20130 | - | 3-oxoacyl-[acyl-carrier protein] reductase (EC 1.1.1.100)                                                                                                                                                       | Fatty_acid_initiation_elongation |
| 1218 | 3450 | <a href="#">NEOS13_1199</a>   | peg | 3450_21823_20882 | 21823 | 20882 | - | Malonyl CoA-acyl carrier protein transacylase (EC 2.3.1.39)                                                                                                                                                     |                                  |
| 1219 | 3450 | <a href="#">NEOS13_1200</a>   | peg | 3450_22862_21846 | 22862 | 21846 | - | 3-oxoacyl-[acyl-carrier-protein] synthase, KASIII (EC 2.3.1.41)                                                                                                                                                 | Fatty_acid_initiation_elongation |
| 1220 | 3450 | <a href="#">NEOS13_1201</a>   | peg | 3450_23236_23832 | 23236 | 23832 | + | Recombination protein RecR                                                                                                                                                                                      |                                  |
| 1221 | 3450 | <a href="#">NEOS13_1202</a>   | peg | 3450_23932_26340 | 23932 | 26340 | + | Outer membrane protein assembly factor YaeT precursor                                                                                                                                                           |                                  |
| 1222 | 3450 | <a href="#">NEOS13_1203</a>   | peg | 3450_26368_26964 | 26368 | 26964 | + | Outer membrane protein H precursor                                                                                                                                                                              |                                  |
| 1223 | 3450 | <a href="#">NEOS13_1204</a>   | peg | 3450_26982_28040 | 26982 | 28040 | + | UDP-3-O-[3-hydroxymristoyl] glucosamine N-acyltransferase (EC 2.3.1.-)                                                                                                                                          |                                  |
| 1224 | 3450 | <a href="#">NEOS13_1205</a>   | peg | 3450_30421_28346 | 30421 | 28346 | - | hypothetical protein                                                                                                                                                                                            |                                  |
| 1225 | 3450 | <a href="#">NEOS13_1206</a>   | peg | 3450_30577_30437 | 30577 | 30437 | - | hypothetical protein                                                                                                                                                                                            |                                  |
| 1226 | 3452 | <a href="#">NEOS13_1207</a>   | peg | 3452_542_721     | 542   | 721   | + | hypothetical protein                                                                                                                                                                                            |                                  |
| 1227 | 3452 | <a href="#">NEOS13_1208</a>   | peg | 3452_1730_1599   | 1730  | 1599  | - | hypothetical protein                                                                                                                                                                                            |                                  |
| 1228 | 3452 | <a href="#">NEOS13_1209</a>   | peg | 3452_2345_2962   | 2345  | 2962  | + | hypothetical protein                                                                                                                                                                                            |                                  |
| 1229 | 3452 | <a href="#">NEOS13_1210</a>   | peg | 3452_3909_3010   | 3909  | 3010  | - | Octaprenyl-diphosphate synthase (EC 2.5.1.-) / Dimethylallyltransferase (EC 2.5.1.1) / Geranyltransferase (farnesyl) diphosphate synthase (EC 2.5.1.10) / Geranylgeranyl pyrophosphate synthetase (EC 2.5.1.29) |                                  |
| 1230 | 3452 | <a href="#">NEOS13_1211</a>   | peg | 3452_4552_3959   | 4552  | 3959  | - | Glucosamine-1-phosphate N-acetyltransferase (EC 2.3.1.157)                                                                                                                                                      |                                  |
| 1231 | 3452 | <a href="#">NEOS13_1212</a>   | peg | 3452_4929_5111   | 4929  | 5111  | + | hypothetical protein                                                                                                                                                                                            |                                  |
| 1232 | 3452 | <a href="#">NEOS13_1213</a>   | peg | 3452_5209_6333   | 5209  | 6333  | + | putative 23S rRNA (Uracil-5-)-methyltransferase                                                                                                                                                                 |                                  |
| 1233 | 3452 | <a href="#">NEOS13_1214</a>   | peg | 3452_6476_6357   | 6476  | 6357  | - | hypothetical protein                                                                                                                                                                                            |                                  |
| 1234 | 3452 | <a href="#">NEOS13_0020ma</a> | rna | 3452_7029_6955   | 7029  | 6955  | - | tRNA-Pro-GGG                                                                                                                                                                                                    | RNA                              |
| 1235 | 3452 | <a href="#">NEOS13_1215</a>   | peg | 3452_7295_7041   | 7295  | 7041  | - | hypothetical protein                                                                                                                                                                                            |                                  |
| 1236 | 3452 | <a href="#">NEOS13_1216</a>   | peg | 3452_7424_7305   | 7424  | 7305  | - | hypothetical protein                                                                                                                                                                                            |                                  |
| 1237 | 3452 | <a href="#">NEOS13_1217</a>   | peg | 3452_7502_8191   | 7502  | 8191  | + | Uracil-DNA glycosylase, family 1                                                                                                                                                                                |                                  |
| 1238 | 3452 | <a href="#">NEOS13_1218</a>   | peg | 3452_8201_8341   | 8201  | 8341  | + | hypothetical protein                                                                                                                                                                                            |                                  |
| 1239 | 3452 | <a href="#">NEOS13_1219</a>   | peg | 3452_8533_8931   | 8533  | 8931  | + | hypothetical protein                                                                                                                                                                                            |                                  |
| 1240 | 3452 | <a href="#">NEOS13_1220</a>   | peg | 3452_8996_10159  | 8996  | 10159 | + | hypothetical protein                                                                                                                                                                                            |                                  |
| 1241 | 3452 | <a href="#">NEOS13_1221</a>   | peg | 3452_10296_10454 | 10296 | 10454 | + | hypothetical protein                                                                                                                                                                                            |                                  |
| 1242 | 3452 | <a href="#">NEOS13_1222</a>   | peg | 3452_11083_10817 | 11083 | 10817 | - | Mobile element protein                                                                                                                                                                                          |                                  |
| 1243 | 3452 | <a href="#">NEOS13_1223</a>   | peg | 3452_12274_11654 | 12274 | 11654 | - | Leucine-rich repeat containing protein                                                                                                                                                                          | Leucine-rich repeat              |
| 1244 | 3453 | <a href="#">NEOS13_1224</a>   | peg | 3453_232_1557    | 232   | 1557  | + | hypothetical protein                                                                                                                                                                                            |                                  |
| 1245 | 3453 | <a href="#">NEOS13_1225</a>   | peg | 3453_1723_1893   | 1723  | 1893  | + | Mobile element protein                                                                                                                                                                                          |                                  |
| 1246 | 3453 | <a href="#">NEOS13_1226</a>   | peg | 3453_2135_2275   | 2135  | 2275  | + | Mobile element protein                                                                                                                                                                                          |                                  |



|      |      |                               |     |                  |       |       |   |                                                                                                   |                     |
|------|------|-------------------------------|-----|------------------|-------|-------|---|---------------------------------------------------------------------------------------------------|---------------------|
| 1247 | 3453 | <a href="#">NEOS13_1227</a>   | peg | 3453_2611_2775   | 2611  | 2775  | + | Integrase, catalytic region                                                                       |                     |
| 1248 | 3453 | <a href="#">NEOS13_1228</a>   | peg | 3453_3053_6259   | 3053  | 6259  | + | hypothetical protein                                                                              |                     |
| 1249 | 3453 | <a href="#">NEOS13_1229</a>   | peg | 3453_6730_8781   | 6730  | 8781  | + | hypothetical protein                                                                              |                     |
| 1250 | 3453 | <a href="#">NEOS13_1230</a>   | peg | 3453_9241_9128   | 9241  | 9128  | - | hypothetical protein                                                                              |                     |
| 1251 | 3453 | <a href="#">NEOS13_1231</a>   | peg | 3453_9505_9389   | 9505  | 9389  | - | hypothetical protein                                                                              |                     |
| 1252 | 3453 | <a href="#">NEOS13_1232</a>   | peg | 3453_9603_10487  | 9603  | 10487 | + | hypothetical protein                                                                              |                     |
| 1253 | 3453 | <a href="#">NEOS13_1233</a>   | peg | 3453_10451_11071 | 10451 | 11071 | + | putative ATP/GTP-binding protein                                                                  |                     |
| 1254 | 3453 | <a href="#">NEOS13_1234</a>   | peg | 3453_11209_12297 | 11209 | 12297 | + | hypothetical protein                                                                              |                     |
| 1255 | 3453 | <a href="#">NEOS13_1235</a>   | peg | 3453_12768_13979 | 12768 | 13979 | + | hypothetical protein                                                                              |                     |
| 1256 | 3453 | <a href="#">NEOS13_1236</a>   | peg | 3453_14231_14106 | 14231 | 14106 | - | hypothetical protein                                                                              |                     |
| 1257 | 3453 | <a href="#">NEOS13_1237</a>   | peg | 3453_14305_17160 | 14305 | 17160 | + | hypothetical protein                                                                              |                     |
| 1258 | 3453 | <a href="#">NEOS13_1238</a>   | peg | 3453_17581_17447 | 17581 | 17447 | - | hypothetical protein                                                                              |                     |
| 1259 | 3453 | <a href="#">NEOS13_1239</a>   | peg | 3453_19881_18007 | 19881 | 18007 | - | hypothetical protein                                                                              |                     |
| 1260 | 3453 | <a href="#">NEOS13_1240</a>   | peg | 3453_20456_20001 | 20456 | 20001 | - | hypothetical protein                                                                              |                     |
| 1261 | 3453 | <a href="#">NEOS13_1241</a>   | peg | 3453_20765_20574 | 20765 | 20574 | - | hypothetical protein                                                                              |                     |
| 1262 | 3453 | <a href="#">NEOS13_1242</a>   | peg | 3453_20867_21607 | 20867 | 21607 | + | putative signal peptide                                                                           |                     |
| 1263 | 3453 | <a href="#">NEOS13_1243</a>   | peg | 3453_22194_22078 | 22194 | 22078 | - | hypothetical protein                                                                              |                     |
| 1264 | 3453 | <a href="#">NEOS13_1244</a>   | peg | 3453_22312_22196 | 22312 | 22196 | - | hypothetical protein                                                                              |                     |
| 1265 | 3454 | <a href="#">NEOS13_1245</a>   | peg | 3454_1036_344    | 1036  | 344   | - | Leucine-rich repeat containing protein                                                            | Leucine-rich repeat |
| 1266 | 3455 | <a href="#">NEOS13_1246</a>   | peg | 3455_170_1057    | 170   | 1057  | + | hypothetical protein                                                                              |                     |
| 1267 | 3455 | <a href="#">NEOS13_1247</a>   | peg | 3455_1359_1123   | 1359  | 1123  | - | Mobile element protein                                                                            |                     |
| 1268 | 3456 | <a href="#">NEOS13_1248</a>   | peg | 3456_170_1057    | 170   | 1057  | + | transposase                                                                                       | Transposase         |
| 1269 | 3457 | <a href="#">NEOS13_1249</a>   | peg | 3457_1339_344    | 1339  | 344   | - | Leucine-rich repeat containing protein                                                            | Leucine-rich repeat |
| 1270 | 3458 | <a href="#">NEOS13_1250</a>   | peg | 3458_42_1367     | 42    | 1367  | + | Leucine-rich repeat containing protein                                                            | Leucine-rich repeat |
| 1271 | 3459 | <a href="#">NEOS13_1251</a>   | peg | 3459_52_918      | 52    | 918   | + | Leucine-rich repeat containing protein                                                            | Leucine-rich repeat |
| 1272 | 3460 | <a href="#">NEOS13_1252</a>   | peg | 3460_429_295     | 429   | 295   | - | hypothetical protein                                                                              |                     |
| 1273 | 3460 | <a href="#">NEOS13_1253</a>   | peg | 3460_1303_626    | 1303  | 626   | - | Cytidylylase (EC 2.7.4.14)                                                                        |                     |
| 1274 | 3460 | <a href="#">NEOS13_1254</a>   | peg | 3460_2182_1328   | 2182  | 1328  | - | Phosphatidate cytidylyltransferase (EC 2.7.7.41)                                                  |                     |
| 1275 | 3460 | <a href="#">NEOS13_1255</a>   | peg | 3460_2937_2179   | 2937  | 2179  | - | Undecaprenyl pyrophosphate synthetase (EC 2.5.1.31)                                               |                     |
| 1276 | 3460 | <a href="#">NEOS13_1256</a>   | peg | 3460_4266_2947   | 4266  | 2947  | - | Adenylosuccinate synthetase (EC 6.3.4.4)                                                          |                     |
| 1277 | 3460 | <a href="#">NEOS13_1257</a>   | peg | 3460_6098_4290   | 6098  | 4290  | - | Translation elongation factor LepA                                                                |                     |
| 1278 | 3460 | <a href="#">NEOS13_1258</a>   | peg | 3460_6926_6291   | 6926  | 6291  | - | Thiamin pyrophosphokinase (EC 2.7.6.2)                                                            |                     |
| 1279 | 3460 | <a href="#">NEOS13_0021ma</a> | rna | 3460_7043_6960   | 7043  | 6960  | - | tRNA-Leu-CAG                                                                                      | RNA                 |
| 1280 | 3460 | <a href="#">NEOS13_1259</a>   | peg | 3460_7709_7098   | 7709  | 7098  | - | hypothetical protein                                                                              |                     |
| 1281 | 3460 | <a href="#">NEOS13_1260</a>   | peg | 3460_7877_9028   | 7877  | 9028  | + | Sulfite reductase [NADPH] flavoprotein alpha-component (EC 1.8.1.2)                               |                     |
| 1282 | 3460 | <a href="#">NEOS13_1261</a>   | peg | 3460_9615_9118   | 9615  | 9118  | - | 2-C-methyl-D-erythritol 2,4-cyclodiphosphate synthase (EC 4.6.1.12)                               |                     |
| 1283 | 3460 | <a href="#">NEOS13_1262</a>   | peg | 3460_9966_10982  | 9966  | 10982 | + | putative lipase transmembrane protein                                                             |                     |
| 1284 | 3460 | <a href="#">NEOS13_1263</a>   | peg | 3460_11038_12585 | 11038 | 12585 | + | UDP-N-acetylglucosamine 1-carboxyvinyltransferase (EC 2.5.1.7)                                    |                     |
| 1285 | 3460 | <a href="#">NEOS13_1264</a>   | peg | 3460_13369_13956 | 13369 | 13956 | + | hypothetical protein                                                                              |                     |
| 1286 | 3460 | <a href="#">NEOS13_1265</a>   | peg | 3460_14186_15685 | 14186 | 15685 | + | hypothetical protein                                                                              |                     |
| 1287 | 3460 | <a href="#">NEOS13_1266</a>   | peg | 3460_16039_15872 | 16039 | 15872 | - | hypothetical protein                                                                              |                     |
| 1288 | 3460 | <a href="#">NEOS13_1267</a>   | peg | 3460_16170_16364 | 16170 | 16364 | + | Mobile element protein                                                                            |                     |
| 1289 | 3460 | <a href="#">NEOS13_1268</a>   | peg | 3460_16621_17490 | 16621 | 17490 | + | Lysyl-lysine 2,3-aminomutase                                                                      |                     |
| 1290 | 3460 | <a href="#">NEOS13_1269</a>   | peg | 3460_17818_17516 | 17818 | 17516 | - | hypothetical protein                                                                              |                     |
| 1291 | 3460 | <a href="#">NEOS13_1270</a>   | peg | 3460_18011_17898 | 18011 | 17898 | - | hypothetical protein                                                                              |                     |
| 1292 | 3461 | <a href="#">NEOS13_1271</a>   | peg | 3461_1086_652    | 1086  | 652   | - | hypothetical protein                                                                              |                     |
| 1293 | 3461 | <a href="#">NEOS13_1272</a>   | peg | 3461_1604_2995   | 1604  | 2995  | + | hypothetical protein                                                                              |                     |
| 1294 | 3461 | <a href="#">NEOS13_1273</a>   | peg | 3461_3149_3298   | 3149  | 3298  | + | hypothetical protein                                                                              |                     |
| 1295 | 3461 | <a href="#">NEOS13_1274</a>   | peg | 3461_3328_3465   | 3328  | 3465  | + | hypothetical protein                                                                              |                     |
| 1296 | 3461 | <a href="#">NEOS13_1275</a>   | peg | 3461_3906_3739   | 3906  | 3739  | - | hypothetical protein                                                                              |                     |
| 1297 | 3461 | <a href="#">NEOS13_1276</a>   | peg | 3461_4431_4616   | 4431  | 4616  | + | hypothetical protein                                                                              |                     |
| 1298 | 3461 | <a href="#">NEOS13_1277</a>   | peg | 3461_4774_4965   | 4774  | 4965  | + | hypothetical protein                                                                              |                     |
| 1299 | 3461 | <a href="#">NEOS13_1278</a>   | peg | 3461_5010_5207   | 5010  | 5207  | + | hypothetical protein                                                                              |                     |
| 1300 | 3461 | <a href="#">NEOS13_1279</a>   | peg | 3461_5580_5762   | 5580  | 5762  | + | Mobile element protein                                                                            |                     |
| 1301 | 3461 | <a href="#">NEOS13_1280</a>   | peg | 3461_6379_6573   | 6379  | 6573  | + | hypothetical protein                                                                              |                     |
| 1302 | 3461 | <a href="#">NEOS13_1281</a>   | peg | 3461_6619_6867   | 6619  | 6867  | + | hypothetical protein                                                                              |                     |
| 1303 | 3461 | <a href="#">NEOS13_1282</a>   | peg | 3461_7344_7219   | 7344  | 7219  | - | hypothetical protein                                                                              |                     |
| 1304 | 3461 | <a href="#">NEOS13_1283</a>   | peg | 3461_7454_7741   | 7454  | 7741  | + | hypothetical protein                                                                              |                     |
| 1305 | 3461 | <a href="#">NEOS13_1284</a>   | peg | 3461_8050_8244   | 8050  | 8244  | + | hypothetical protein                                                                              |                     |
| 1306 | 3461 | <a href="#">NEOS13_1285</a>   | peg | 3461_11279_8592  | 11279 | 8592  | - | COG0553: Superfamily II DNA/RNA helicases, SNF2 family                                            |                     |
| 1307 | 3461 | <a href="#">NEOS13_1286</a>   | peg | 3461_11356_12183 | 11356 | 12183 | + | hypothetical protein                                                                              |                     |
| 1308 | 3461 | <a href="#">NEOS13_1287</a>   | peg | 3461_13227_12265 | 13227 | 12265 | - | Rhodanese domain protein UPF0176, Firmicutes subgroup                                             |                     |
| 1309 | 3461 | <a href="#">NEOS13_1288</a>   | peg | 3461_14112_13252 | 14112 | 13252 | - | hypothetical protein                                                                              |                     |
| 1310 | 3461 | <a href="#">NEOS13_1289</a>   | peg | 3461_14749_15069 | 14749 | 15069 | + | Thioredoxin                                                                                       |                     |
| 1311 | 3461 | <a href="#">NEOS13_1290</a>   | peg | 3461_15836_15480 | 15836 | 15480 | - | tRNA (cytosine34-2'-O)-methyltransferase (EC 2.1.1.-)                                             |                     |
| 1312 | 3461 | <a href="#">NEOS13_1291</a>   | peg | 3461_16834_16016 | 16834 | 16016 | - | putative mip (macrophage infectivity potentiator, ftkbp-type peptidyl-prolyl cis-trans isomerase) |                     |
| 1313 | 3461 | <a href="#">NEOS13_1292</a>   | peg | 3461_18680_16893 | 18680 | 16893 | - | Aspartyl-tRNA synthetase (EC 6.1.1.12)                                                            |                     |
| 1314 | 3461 | <a href="#">NEOS13_1293</a>   | peg | 3461_20138_18690 | 20138 | 18690 | - | Histidyl-tRNA synthetase (EC 6.1.1.21)                                                            |                     |
| 1315 | 3461 | <a href="#">NEOS13_1294</a>   | peg | 3461_20375_21529 | 20375 | 21529 | + | hypothetical protein                                                                              |                     |
| 1316 | 3461 | <a href="#">NEOS13_1295</a>   | peg | 3461_24292_21728 | 24292 | 21728 | - | hypothetical protein                                                                              |                     |
| 1317 | 3461 | <a href="#">NEOS13_1296</a>   | peg | 3461_24532_25884 | 24532 | 25884 | + | Hexose phosphate uptake regulatory protein UhpC                                                   |                     |

|      |      |                             |     |                  |       |       |   |                                                                                      |                                  |
|------|------|-----------------------------|-----|------------------|-------|-------|---|--------------------------------------------------------------------------------------|----------------------------------|
| 1318 | 3461 | <a href="#">NEOS13_1297</a> | peg | 3461_26465_30214 | 26465 | 30214 | + | DNA polymerase III alpha subunit (EC 2.7.7.7)                                        |                                  |
| 1319 | 3461 | <a href="#">NEOS13_1298</a> | peg | 3461_31368_32372 | 31368 | 32372 | + | hypothetical protein                                                                 |                                  |
| 1320 | 3461 | <a href="#">NEOS13_1299</a> | peg | 3461_32379_32939 | 32379 | 32939 | + | hypothetical protein                                                                 |                                  |
| 1321 | 3461 | <a href="#">NEOS13_1300</a> | peg | 3461_33376_34908 | 33376 | 34908 | + | transposase                                                                          | Transposase                      |
| 1322 | 3461 | <a href="#">NEOS13_1301</a> | peg | 3461_35505_35080 | 35505 | 35080 | - | hypothetical protein                                                                 |                                  |
| 1323 | 3461 | <a href="#">NEOS13_1302</a> | peg | 3461_35782_36981 | 35782 | 36981 | + | D-alanyl-D-alanine carboxypeptidase (EC 3.4.16.4)                                    |                                  |
| 1324 | 3461 | <a href="#">NEOS13_1303</a> | peg | 3461_37874_37996 | 37874 | 37996 | + | hypothetical protein                                                                 |                                  |
| 1325 | 3461 | <a href="#">NEOS13_1304</a> | peg | 3461_38263_38469 | 38263 | 38469 | + | hypothetical protein                                                                 |                                  |
| 1326 | 3461 | <a href="#">NEOS13_1305</a> | peg | 3461_39301_38453 | 39301 | 38453 | - | SSU rRNA (adenine(1518)-N(6)/adenine(1519)-N(6))-dimethyltransferase (EC 2.1.1.182)  |                                  |
| 1327 | 3461 | <a href="#">NEOS13_1306</a> | peg | 3461_40486_39404 | 40486 | 39404 | - | hypothetical protein                                                                 |                                  |
| 1328 | 3461 | <a href="#">NEOS13_1307</a> | peg | 3461_41731_40604 | 41731 | 40604 | - | Ribosomal RNA small subunit methyltransferase B (EC 2.1.1.-)                         |                                  |
| 1329 | 3461 | <a href="#">NEOS13_1308</a> | peg | 3461_41854_41741 | 41854 | 41741 | - | hypothetical protein                                                                 |                                  |
| 1330 | 3461 | <a href="#">NEOS13_1309</a> | peg | 3461_42204_42320 | 42204 | 42320 | + | hypothetical protein                                                                 |                                  |
| 1331 | 3461 | <a href="#">NEOS13_1310</a> | peg | 3461_42476_42360 | 42476 | 42360 | - | hypothetical protein                                                                 |                                  |
| 1332 | 3461 | <a href="#">NEOS13_1311</a> | peg | 3461_42538_44202 | 42538 | 44202 | + | Apolipoprotein N-acyltransferase (EC 2.3.1.-)                                        |                                  |
| 1333 | 3461 | <a href="#">NEOS13_1312</a> | peg | 3461_45020_45898 | 45020 | 45898 | + | UDP-3-O-[3-hydroxymyristoyl] N-acetylglucosamine deacetylase (EC 3.5.1.-)            |                                  |
| 1334 | 3461 | <a href="#">NEOS13_1313</a> | peg | 3461_45898_46365 | 45898 | 46365 | + | (3R)-hydroxymyristoyl-[acyl carrier protein] dehydratase (EC 4.2.1.-)                | Fatty_acid_initiation_elongation |
| 1335 | 3461 | <a href="#">NEOS13_1314</a> | peg | 3461_46409_47272 | 46409 | 47272 | + | Acyl-[acyl-carrier-protein]-UDP-N-acetylglucosamine O-acyltransferase (EC 2.3.1.129) |                                  |
| 1336 | 3461 | <a href="#">NEOS13_1315</a> | peg | 3461_47344_48291 | 47344 | 48291 | + | Methionyl-tRNA formyltransferase (EC 2.1.2.9)                                        |                                  |
| 1337 | 3461 | <a href="#">NEOS13_1316</a> | peg | 3461_48608_48754 | 48608 | 48754 | + | hypothetical protein                                                                 |                                  |
| 1338 | 3461 | <a href="#">NEOS13_1317</a> | peg | 3461_49055_49972 | 49055 | 49972 | + | hypothetical protein                                                                 |                                  |
| 1339 | 3461 | <a href="#">NEOS13_1318</a> | peg | 3461_50029_51312 | 50029 | 51312 | + | hypothetical protein                                                                 |                                  |
| 1340 | 3461 | <a href="#">NEOS13_1319</a> | peg | 3461_51605_51342 | 51605 | 51342 | - | hypothetical protein                                                                 |                                  |
| 1341 | 3461 | <a href="#">NEOS13_1320</a> | peg | 3461_51747_51634 | 51747 | 51634 | - | hypothetical protein                                                                 |                                  |
| 1342 | 3461 | <a href="#">NEOS13_1321</a> | peg | 3461_52410_52523 | 52410 | 52523 | + | hypothetical protein                                                                 |                                  |
| 1343 | 3461 | <a href="#">NEOS13_1322</a> | peg | 3461_52885_53448 | 52885 | 53448 | + | hypothetical protein                                                                 |                                  |
| 1344 | 3461 | <a href="#">NEOS13_1323</a> | peg | 3461_53683_54354 | 53683 | 54354 | + | LSU ribosomal protein L3p (L3e)                                                      |                                  |
| 1345 | 3461 | <a href="#">NEOS13_1324</a> | peg | 3461_54378_55067 | 54378 | 55067 | + | LSU ribosomal protein L4p (L1e)                                                      |                                  |
| 1346 | 3461 | <a href="#">NEOS13_1325</a> | peg | 3461_55112_55447 | 55112 | 55447 | + | LSU ribosomal protein L23p (L23Ac)                                                   |                                  |
| 1347 | 3461 | <a href="#">NEOS13_1326</a> | peg | 3461_55467_56312 | 55467 | 56312 | + | LSU ribosomal protein L2p (L8e)                                                      |                                  |
| 1348 | 3461 | <a href="#">NEOS13_1327</a> | peg | 3461_56315_56596 | 56315 | 56596 | + | SSU ribosomal protein S19p (S15e)                                                    |                                  |
| 1349 | 3461 | <a href="#">NEOS13_1328</a> | peg | 3461_56593_56934 | 56593 | 56934 | + | LSU ribosomal protein L22p (L17e)                                                    |                                  |
| 1350 | 3461 | <a href="#">NEOS13_1329</a> | peg | 3461_56938_57582 | 56938 | 57582 | + | SSU ribosomal protein S3p (S3e)                                                      |                                  |
| 1351 | 3461 | <a href="#">NEOS13_1330</a> | peg | 3461_57585_58004 | 57585 | 58004 | + | LSU ribosomal protein L16p (L10e)                                                    |                                  |
| 1352 | 3461 | <a href="#">NEOS13_1331</a> | peg | 3461_58014_58214 | 58014 | 58214 | + | putative 50S ribosomal protein L29                                                   |                                  |
| 1353 | 3461 | <a href="#">NEOS13_1332</a> | peg | 3461_58242_58481 | 58242 | 58481 | + | SSU ribosomal protein S17p (S11e)                                                    |                                  |
| 1354 | 3461 | <a href="#">NEOS13_1333</a> | peg | 3461_58515_58883 | 58515 | 58883 | + | LSU ribosomal protein L14p (L23e)                                                    |                                  |
| 1355 | 3461 | <a href="#">NEOS13_1334</a> | peg | 3461_58899_59258 | 58899 | 59258 | + | 50S ribosomal protein L24                                                            |                                  |
| 1356 | 3461 | <a href="#">NEOS13_1335</a> | peg | 3461_59267_59824 | 59267 | 59824 | + | LSU ribosomal protein L5p (L11e)                                                     |                                  |
| 1357 | 3461 | <a href="#">NEOS13_1336</a> | peg | 3461_59841_60245 | 59841 | 60245 | + | SSU ribosomal protein S8p (S15Ae)                                                    |                                  |
| 1358 | 3461 | <a href="#">NEOS13_1337</a> | peg | 3461_60284_60829 | 60284 | 60829 | + | LSU ribosomal protein L6p (L9e)                                                      |                                  |
| 1359 | 3461 | <a href="#">NEOS13_1338</a> | peg | 3461_60987_61232 | 60987 | 61232 | + | LSU ribosomal protein L18p (L5e)                                                     |                                  |
| 1360 | 3461 | <a href="#">NEOS13_1339</a> | peg | 3461_61264_61764 | 61264 | 61764 | + | SSU ribosomal protein S5p (S2e)                                                      |                                  |
| 1361 | 3461 | <a href="#">NEOS13_1340</a> | peg | 3461_61761_62210 | 61761 | 62210 | + | LSU ribosomal protein L15p (L27Ae)                                                   |                                  |
| 1362 | 3461 | <a href="#">NEOS13_1341</a> | peg | 3461_62244_63617 | 62244 | 63617 | + | Preprotein translocase secY subunit (TC 3.A.5.1.1)                                   |                                  |
| 1363 | 3461 | <a href="#">NEOS13_1342</a> | peg | 3461_63777_64145 | 63777 | 64145 | + | SSU ribosomal protein S13p (S18e)                                                    |                                  |
| 1364 | 3461 | <a href="#">NEOS13_1343</a> | peg | 3461_64167_64580 | 64167 | 64580 | + | SSU ribosomal protein S11p (S14e)                                                    |                                  |
| 1365 | 3461 | <a href="#">NEOS13_1344</a> | peg | 3461_64620_65735 | 64620 | 65735 | + | DNA-directed RNA polymerase alpha subunit (EC 2.7.7.6)                               |                                  |
| 1366 | 3461 | <a href="#">NEOS13_1345</a> | peg | 3461_65810_66181 | 65810 | 66181 | + | LSU ribosomal protein L17p                                                           |                                  |
| 1367 | 3461 | <a href="#">NEOS13_1346</a> | peg | 3461_66277_67521 | 66277 | 67521 | + | FIG047466: hypothetical protein                                                      |                                  |
| 1368 | 3461 | <a href="#">NEOS13_1347</a> | peg | 3461_69569_68136 | 69569 | 68136 | - | hypothetical protein                                                                 |                                  |
| 1369 | 3462 | <a href="#">NEOS13_1348</a> | peg | 3462_958_110     | 958   | 110   | - | Leucine-rich repeat containing protein                                               | Leucine-rich repeat              |
| 1370 | 3463 | <a href="#">NEOS13_1349</a> | peg | 3463_166_279     | 166   | 279   | + | hypothetical protein                                                                 |                                  |
| 1371 | 3463 | <a href="#">NEOS13_1350</a> | peg | 3463_308_649     | 308   | 649   | + | Transposase, IS4 family protein                                                      | Transposase                      |
| 1372 | 3463 | <a href="#">NEOS13_1351</a> | peg | 3463_2078_1014   | 2078  | 1014  | - | Leucine-rich repeat containing protein                                               | Leucine-rich repeat              |
| 1373 | 3463 | <a href="#">NEOS13_1352</a> | peg | 3463_2053_2184   | 2053  | 2184  | + | hypothetical protein                                                                 |                                  |
| 1374 | 3463 | <a href="#">NEOS13_1353</a> | peg | 3463_3984_2362   | 3984  | 2362  | - | Leucine-rich repeat containing protein                                               | Leucine-rich repeat              |
| 1375 | 3463 | <a href="#">NEOS13_1354</a> | peg | 3463_6029_4269   | 6029  | 4269  | - | Leucine-rich repeat containing protein                                               | Leucine-rich repeat              |
| 1376 | 3463 | <a href="#">NEOS13_1355</a> | peg | 3463_7518_6316   | 7518  | 6316  | - | Leucine-rich repeat containing protein                                               | Leucine-rich repeat              |
| 1377 | 3463 | <a href="#">NEOS13_1356</a> | peg | 3463_9580_7751   | 9580  | 7751  | - | Leucine-rich repeat containing protein                                               | Leucine-rich repeat              |
| 1378 | 3463 | <a href="#">NEOS13_1357</a> | peg | 3463_10932_9868  | 10932 | 9868  | - | Leucine-rich repeat containing protein                                               | Leucine-rich repeat              |
| 1379 | 3463 | <a href="#">NEOS13_1358</a> | peg | 3463_10931_11068 | 10931 | 11068 | + | hypothetical protein                                                                 |                                  |
| 1380 | 3463 | <a href="#">NEOS13_1359</a> | peg | 3463_11796_11323 | 11796 | 11323 | - | hypothetical protein                                                                 |                                  |
| 1381 | 3463 | <a href="#">NEOS13_1360</a> | peg | 3463_12799_11894 | 12799 | 11894 | - | Translation elongation factor P Lys34:lysine transferase                             |                                  |
| 1382 | 3463 | <a href="#">NEOS13_1361</a> | peg | 3463_13417_12848 | 13417 | 12848 | - | Translation elongation factor P                                                      |                                  |
| 1383 | 3463 | <a href="#">NEOS13_1362</a> | peg | 3463_13685_13810 | 13685 | 13810 | + | hypothetical protein                                                                 |                                  |
| 1384 | 3463 | <a href="#">NEOS13_1363</a> | peg | 3463_13851_14012 | 13851 | 14012 | + | hypothetical protein                                                                 |                                  |
| 1385 | 3463 | <a href="#">NEOS13_1364</a> | peg | 3463_19465_14045 | 19465 | 14045 | - | hypothetical protein                                                                 |                                  |
| 1386 | 3463 | <a href="#">NEOS13_1365</a> | peg | 3463_19851_19976 | 19851 | 19976 | + | hypothetical protein                                                                 |                                  |
| 1387 | 3464 | <a href="#">NEOS13_1366</a> | peg | 3464_1044_595    | 1044  | 595   | - | hypothetical protein                                                                 |                                  |
| 1388 | 3465 | <a href="#">NEOS13_1367</a> | peg | 3465_188_394     | 188   | 394   | + | Leucine-rich repeat containing protein                                               | Leucine-rich repeat              |
| 1389 | 3466 | <a href="#">NEOS13_1368</a> | peg | 3466_263_96      | 263   | 96    | - | hypothetical protein                                                                 |                                  |
| 1390 | 3466 | <a href="#">NEOS13_1369</a> | peg | 3466_804_454     | 804   | 454   | - | Leucine-rich repeat containing protein                                               | Leucine-rich repeat              |

|      |      |                               |     |                  |       |       |   |                                                                                                    |                     |
|------|------|-------------------------------|-----|------------------|-------|-------|---|----------------------------------------------------------------------------------------------------|---------------------|
| 1391 | 3467 | <a href="#">NEOS13_1370</a>   | peg | 3467_345_136     | 345   | 136   | - | hypothetical protein                                                                               |                     |
| 1392 | 3467 | <a href="#">NEOS13_1371</a>   | peg | 3467_1500_712    | 1500  | 712   | - | hypothetical protein                                                                               |                     |
| 1393 | 3467 | <a href="#">NEOS13_1372</a>   | peg | 3467_1643_1783   | 1643  | 1783  | + | hypothetical protein                                                                               |                     |
| 1394 | 3468 | <a href="#">NEOS13_1373</a>   | peg | 3468_251_99      | 251   | 99    | - | hypothetical protein                                                                               |                     |
| 1395 | 3469 | <a href="#">NEOS13_1374</a>   | peg | 3469_61_621      | 61    | 621   | + | hypothetical protein                                                                               |                     |
| 1396 | 3469 | <a href="#">NEOS13_1375</a>   | peg | 3469_853_4506    | 853   | 4506  | + | hypothetical protein                                                                               |                     |
| 1397 | 3469 | <a href="#">NEOS13_1376</a>   | peg | 3469_5659_4496   | 5659  | 4496  | - | Cell division protein FtsW                                                                         |                     |
| 1398 | 3469 | <a href="#">NEOS13_1377</a>   | peg | 3469_6446_5697   | 6446  | 5697  | - | Membrane-bound lytic murein transglycosylase D precursor (EC 3.2.1.-)                              |                     |
| 1399 | 3469 | <a href="#">NEOS13_1378</a>   | peg | 3469_7813_6473   | 7813  | 6473  | - | UDP-N-acetylmuramoylalanine--D-glutamate ligase (EC 6.3.2.9)                                       |                     |
| 1400 | 3469 | <a href="#">NEOS13_1379</a>   | peg | 3469_9021_7825   | 9021  | 7825  | - | Phospho-N-acetylmuramoyl-pentapeptide-transferase (EC 2.7.8.13)                                    |                     |
| 1401 | 3469 | <a href="#">NEOS13_1380</a>   | peg | 3469_10429_9056  | 10429 | 9056  | - | UDP-N-acetylmuramoylalanyl-D-glutamyl-2,6-diaminopimelate--D-alanyl-D-alanine ligase (EC 6.3.2.10) |                     |
| 1402 | 3469 | <a href="#">NEOS13_1381</a>   | peg | 3469_11017_10841 | 11017 | 10841 | - | hypothetical protein                                                                               |                     |
| 1403 | 3469 | <a href="#">NEOS13_1382</a>   | peg | 3469_11724_11101 | 11724 | 11101 | - | hypothetical protein                                                                               |                     |
| 1404 | 3470 | <a href="#">NEOS13_1383</a>   | peg | 3470_376_1017    | 376   | 1017  | + | Leucine-rich repeat containing protein                                                             | Leucine-rich repeat |
| 1405 | 3470 | <a href="#">NEOS13_1384</a>   | peg | 3470_1327_1172   | 1327  | 1172  | - | hypothetical protein                                                                               |                     |
| 1406 | 3470 | <a href="#">NEOS13_1385</a>   | peg | 3470_1373_1594   | 1373  | 1594  | + | hypothetical protein                                                                               |                     |
| 1407 | 3470 | <a href="#">NEOS13_1386</a>   | peg | 3470_1563_1871   | 1563  | 1871  | + | Leucine-rich repeat containing protein                                                             | Leucine-rich repeat |
| 1408 | 3470 | <a href="#">NEOS13_1387</a>   | peg | 3470_2018_2131   | 2018  | 2131  | + | hypothetical protein                                                                               |                     |
| 1409 | 3471 | <a href="#">NEOS13_1388</a>   | peg | 3471_110_1003    | 110   | 1003  | + | Leucine-rich repeat containing protein                                                             | Leucine-rich repeat |
| 1410 | 3471 | <a href="#">NEOS13_1389</a>   | peg | 3471_1519_2004   | 1519  | 2004  | + | Leucine-rich repeat containing protein                                                             | Leucine-rich repeat |
| 1411 | 3471 | <a href="#">NEOS13_1390</a>   | peg | 3471_2029_2514   | 2029  | 2514  | + | Leucine-rich repeat containing protein                                                             | Leucine-rich repeat |
| 1412 | 3471 | <a href="#">NEOS13_1391</a>   | peg | 3471_3090_2929   | 3090  | 2929  | - | hypothetical protein                                                                               |                     |
| 1413 | 3472 | <a href="#">NEOS13_1392</a>   | peg | 3472_496_1047    | 496   | 1047  | + | DNA polymerase III beta subunit (EC 2.7.7.7)                                                       |                     |
| 1414 | 3472 | <a href="#">NEOS13_1393</a>   | peg | 3472_1270_1148   | 1270  | 1148  | - | hypothetical protein                                                                               |                     |
| 1415 | 3473 | <a href="#">NEOS13_1394</a>   | peg | 3473_358_633     | 358   | 633   | + | cytoplasmic membrane protein                                                                       |                     |
| 1416 | 3473 | <a href="#">NEOS13_1395</a>   | peg | 3473_1296_1159   | 1296  | 1159  | - | hypothetical protein                                                                               |                     |
| 1417 | 3473 | <a href="#">NEOS13_1396</a>   | peg | 3473_1600_1391   | 1600  | 1391  | - | Protein YidD                                                                                       |                     |
| 1418 | 3473 | <a href="#">NEOS13_1397</a>   | peg | 3473_2391_1597   | 2391  | 1597  | - | hypothetical protein                                                                               |                     |
| 1419 | 3473 | <a href="#">NEOS13_0022ma</a> | rna | 3473_2648_2565   | 2648  | 2565  | - | tRNA-Leu-GAG                                                                                       | RNA                 |
| 1420 | 3473 | <a href="#">NEOS13_1397</a>   | peg | 3473_3461_2778   | 3461  | 2778  | - | DNA repair protein RecO                                                                            |                     |
| 1421 | 3473 | <a href="#">NEOS13_0023ma</a> | rna | 3473_3549_3621   | 3549  | 3621  | + | tRNA-Arg-TCG                                                                                       | RNA                 |
| 1422 | 3473 | <a href="#">NEOS13_1399</a>   | peg | 3473_3636_4703   | 3636  | 4703  | + | Ribosomal RNA large subunit methyltransferase N (EC 2.1.1.-)                                       |                     |
| 1423 | 3473 | <a href="#">NEOS13_1400</a>   | peg | 3473_4989_4828   | 4989  | 4828  | - | hypothetical protein                                                                               |                     |
| 1424 | 3473 | <a href="#">NEOS13_1401</a>   | peg | 3473_5562_6200   | 5562  | 6200  | + | Ribosomal subunit interface protein                                                                |                     |
| 1425 | 3473 | <a href="#">NEOS13_1402</a>   | peg | 3473_6260_6718   | 6260  | 6718  | + | hypothetical protein                                                                               |                     |
| 1426 | 3473 | <a href="#">NEOS13_1403</a>   | peg | 3473_6778_9660   | 6778  | 9660  | + | hypothetical protein                                                                               |                     |
| 1427 | 3473 | <a href="#">NEOS13_1404</a>   | peg | 3473_11240_9657  | 11240 | 9657  | - | hypothetical protein                                                                               |                     |
| 1428 | 3473 | <a href="#">NEOS13_1405</a>   | peg | 3473_11432_11914 | 11432 | 11914 | + | hypothetical protein                                                                               |                     |
| 1429 | 3473 | <a href="#">NEOS13_1406</a>   | peg | 3473_12020_12439 | 12020 | 12439 | + | hypothetical protein                                                                               |                     |
| 1430 | 3473 | <a href="#">NEOS13_1407</a>   | peg | 3473_12478_15498 | 12478 | 15498 | + | hypothetical protein                                                                               |                     |
| 1431 | 3473 | <a href="#">NEOS13_1408</a>   | peg | 3473_15669_17912 | 15669 | 17912 | + | hypothetical protein                                                                               |                     |
| 1432 | 3473 | <a href="#">NEOS13_1409</a>   | peg | 3473_18434_18012 | 18434 | 18012 | - | Mobile element protein                                                                             |                     |
| 1433 | 3474 | <a href="#">NEOS13_1410</a>   | peg | 3474_59_1270     | 59    | 1270  | + | Leucine-rich repeat containing protein                                                             | Leucine-rich repeat |
| 1434 | 3476 | <a href="#">NEOS13_1411</a>   | peg | 3476_464_195     | 464   | 195   | - | hypothetical protein                                                                               |                     |
| 1435 | 3477 | <a href="#">NEOS13_1412</a>   | peg | 3477_333_986     | 333   | 986   | + | hypothetical protein                                                                               |                     |
| 1436 | 3477 | <a href="#">NEOS13_1413</a>   | peg | 3477_1604_1026   | 1604  | 1026  | - | Pyridoxine biosynthesis glutamine amidotransferase, glutaminase subunit (EC 2.4.2.-)               |                     |
| 1437 | 3477 | <a href="#">NEOS13_1414</a>   | peg | 3477_2510_1605   | 2510  | 1605  | - | Pyridoxine biosynthesis glutamine amidotransferase, synthase subunit (EC 2.4.2.-)                  |                     |
| 1438 | 3477 | <a href="#">NEOS13_1415</a>   | peg | 3477_3447_2698   | 3447  | 2698  | - | DNA polymerase III subunit epsilon                                                                 |                     |
| 1439 | 3477 | <a href="#">NEOS13_1416</a>   | peg | 3477_4064_3444   | 4064  | 3444  | - | GTP-binding protein EngB                                                                           |                     |
| 1440 | 3477 | <a href="#">NEOS13_1417</a>   | peg | 3477_4480_4061   | 4480  | 4061  | - | ATPase YjeE, predicted to have essential role in cell wall biosynthesis                            |                     |
| 1441 | 3477 | <a href="#">NEOS13_1418</a>   | peg | 3477_5205_4483   | 5205  | 4483  | - | FIG00899449: hypothetical protein                                                                  |                     |
| 1442 | 3477 | <a href="#">NEOS13_1419</a>   | peg | 3477_5322_6401   | 5322  | 6401  | + | Leucine dehydrogenase (EC 1.4.1.9)                                                                 |                     |
| 1443 | 3477 | <a href="#">NEOS13_1420</a>   | peg | 3477_6420_8186   | 6420  | 8186  | + | Arginyl-tRNA synthetase (EC 6.1.1.19)                                                              |                     |
| 1444 | 3477 | <a href="#">NEOS13_1421</a>   | peg | 3477_8530_8745   | 8530  | 8745  | + | hypothetical protein                                                                               |                     |
| 1445 | 3478 | <a href="#">NEOS13_1422</a>   | peg | 3478_316_137     | 316   | 137   | - | hypothetical protein                                                                               |                     |
| 1446 | 3478 | <a href="#">NEOS13_1423</a>   | peg | 3478_715_323     | 715   | 323   | - | hypothetical protein                                                                               |                     |
| 1447 | 3478 | <a href="#">NEOS13_1424</a>   | peg | 3478_714_830     | 714   | 830   | + | hypothetical protein                                                                               |                     |
| 1448 | 3478 | <a href="#">NEOS13_1425</a>   | peg | 3478_2092_1160   | 2092  | 1160  | - | Mobile element protein                                                                             |                     |
| 1449 | 3479 | <a href="#">NEOS13_1426</a>   | peg | 3479_516_388     | 516   | 388   | - | hypothetical protein                                                                               |                     |
| 1450 | 3479 | <a href="#">NEOS13_1427</a>   | peg | 3479_882_1100    | 882   | 1100  | + | hypothetical protein                                                                               |                     |
| 1451 | 3479 | <a href="#">NEOS13_1428</a>   | peg | 3479_1975_1397   | 1975  | 1397  | - | hypothetical protein                                                                               |                     |
| 1452 | 3479 | <a href="#">NEOS13_1429</a>   | peg | 3479_2319_2447   | 2319  | 2447  | + | hypothetical protein                                                                               |                     |
| 1453 | 3479 | <a href="#">NEOS13_1430</a>   | peg | 3479_2673_3104   | 2673  | 3104  | + | hypothetical protein                                                                               |                     |
| 1454 | 3479 | <a href="#">NEOS13_1431</a>   | peg | 3479_3712_4248   | 3712  | 4248  | + | hypothetical protein                                                                               |                     |
| 1455 | 3479 | <a href="#">NEOS13_1432</a>   | peg | 3479_4445_4948   | 4445  | 4948  | + | hypothetical protein                                                                               |                     |
| 1456 | 3479 | <a href="#">NEOS13_1433</a>   | peg | 3479_5028_5906   | 5028  | 5906  | + | Uncharacterized protein conserved in bacteria, NMA0228-like                                        |                     |
| 1457 | 3479 | <a href="#">NEOS13_1434</a>   | peg | 3479_5903_6802   | 5903  | 6802  | + | hypothetical protein                                                                               |                     |
| 1458 | 3479 | <a href="#">NEOS13_1435</a>   | peg | 3479_6786_8027   | 6786  | 8027  | + | Ribosomal RNA small subunit methyltransferase B (EC 2.1.1.-)                                       |                     |
| 1459 | 3479 | <a href="#">NEOS13_1436</a>   | peg | 3479_8909_8244   | 8909  | 8244  | - | hypothetical protein                                                                               |                     |
| 1460 | 3479 | <a href="#">NEOS13_1437</a>   | peg | 3479_9361_8918   | 9361  | 8918  | - | hypothetical protein                                                                               |                     |
| 1461 | 3479 | <a href="#">NEOS13_1438</a>   | peg | 3479_14630_9621  | 14630 | 9621  | - | hypothetical protein                                                                               |                     |

|      |      |                               |     |                  |       |       |   |                                                                                       |                           |
|------|------|-------------------------------|-----|------------------|-------|-------|---|---------------------------------------------------------------------------------------|---------------------------|
| 1462 | 3479 | <a href="#">NEOS13_1439</a>   | peg | 3479_14706_14828 | 14706 | 14828 | + | hypothetical protein                                                                  |                           |
| 1463 | 3479 | <a href="#">NEOS13_1440</a>   | peg | 3479_15858_15244 | 15858 | 15244 | - | hypothetical protein                                                                  |                           |
| 1464 | 3479 | <a href="#">NEOS13_1441</a>   | peg | 3479_16723_15908 | 16723 | 15908 | - | hypothetical protein                                                                  |                           |
| 1465 | 3479 | <a href="#">NEOS13_1442</a>   | peg | 3479_16926_16723 | 16926 | 16723 | - | hypothetical protein                                                                  |                           |
| 1466 | 3479 | <a href="#">NEOS13_1443</a>   | peg | 3479_17541_18368 | 17541 | 18368 | + | Mobile element protein                                                                |                           |
| 1467 | 3479 | <a href="#">NEOS13_1444</a>   | peg | 3479_19907_18852 | 19907 | 18852 | - | Leucine-rich repeat containing protein                                                | Leucine-rich repeat       |
| 1468 | 3480 | <a href="#">NEOS13_1445</a>   | peg | 3480_155_24      | 155   | 24    | - | hypothetical protein                                                                  |                           |
| 1469 | 3480 | <a href="#">NEOS13_1446</a>   | peg | 3480_880_194     | 880   | 194   | - | hypothetical protein                                                                  |                           |
| 1470 | 3480 | <a href="#">NEOS13_1447</a>   | peg | 3480_1410_925    | 1410  | 925   | - | hypothetical protein                                                                  |                           |
| 1471 | 3481 | <a href="#">NEOS13_1448</a>   | peg | 3481_76_1242     | 76    | 1242  | + | transposase                                                                           | Transposase               |
| 1472 | 3483 | <a href="#">NEOS13_1449</a>   | peg | 3483_312_569     | 312   | 569   | + | transposase                                                                           | Transposase               |
| 1473 | 3483 | <a href="#">NEOS13_1450</a>   | peg | 3483_807_1601    | 807   | 1601  | + | Putative deoxyribonuclease YcfH                                                       |                           |
| 1474 | 3483 | <a href="#">NEOS13_1451</a>   | peg | 3483_1669_2529   | 1669  | 2529  | + | hypothetical protein                                                                  |                           |
| 1475 | 3483 | <a href="#">NEOS13_1452</a>   | peg | 3483_2791_2522   | 2791  | 2522  | - | hypothetical protein                                                                  |                           |
| 1476 | 3483 | <a href="#">NEOS13_1453</a>   | peg | 3483_2841_3200   | 2841  | 3200  | + | hypothetical protein                                                                  |                           |
| 1477 | 3483 | <a href="#">NEOS13_1454</a>   | peg | 3483_3206_4117   | 3206  | 4117  | + | Phosphatidylserine decarboxylase (EC 4.1.1.65)                                        |                           |
| 1478 | 3483 | <a href="#">NEOS13_1455</a>   | peg | 3483_4134_4283   | 4134  | 4283  | + | hypothetical protein                                                                  |                           |
| 1479 | 3483 | <a href="#">NEOS13_1456</a>   | peg | 3483_4705_7800   | 4705  | 7800  | + | Protein export cytoplasm protein SecA ATPase RNA helicase (TC 3.A.5.1.1)              | Sec_T2SS                  |
| 1480 | 3483 | <a href="#">NEOS13_1457</a>   | peg | 3483_7990_8130   | 7990  | 8130  | + | hypothetical protein                                                                  |                           |
| 1481 | 3483 | <a href="#">NEOS13_1458</a>   | peg | 3483_8651_8199   | 8651  | 8199  | - | hypothetical protein                                                                  |                           |
| 1482 | 3483 | <a href="#">NEOS13_1459</a>   | peg | 3483_8745_9440   | 8745  | 9440  | + | hypothetical protein                                                                  |                           |
| 1483 | 3483 | <a href="#">NEOS13_1460</a>   | peg | 3483_9573_9695   | 9573  | 9695  | + | hypothetical protein                                                                  |                           |
| 1484 | 3483 | <a href="#">NEOS13_1461</a>   | peg | 3483_9850_9966   | 9850  | 9966  | + | hypothetical protein                                                                  |                           |
| 1485 | 3483 | <a href="#">NEOS13_1462</a>   | peg | 3483_10196_10402 | 10196 | 10402 | + | hypothetical protein                                                                  |                           |
| 1486 | 3483 | <a href="#">NEOS13_1463</a>   | peg | 3483_10494_10733 | 10494 | 10733 | + | hypothetical protein                                                                  |                           |
| 1487 | 3483 | <a href="#">NEOS13_1464</a>   | peg | 3483_10807_11787 | 10807 | 11787 | + | Lipoate synthase                                                                      |                           |
| 1488 | 3483 | <a href="#">NEOS13_1465</a>   | peg | 3483_11784_12710 | 11784 | 12710 | + | hypothetical protein                                                                  |                           |
| 1489 | 3483 | <a href="#">NEOS13_1466</a>   | peg | 3483_12834_13880 | 12834 | 13880 | + | Leucine-rich repeat containing protein                                                | Leucine-rich repeat       |
| 1490 | 3483 | <a href="#">NEOS13_1467</a>   | peg | 3483_14163_15578 | 14163 | 15578 | + | Leucine-rich repeat containing protein                                                | Leucine-rich repeat       |
| 1491 | 3483 | <a href="#">NEOS13_1468</a>   | peg | 3483_15627_16337 | 15627 | 16337 | + | Leucine-rich repeat containing protein                                                | Leucine-rich repeat       |
| 1492 | 3483 | <a href="#">NEOS13_1469</a>   | peg | 3483_16632_18392 | 16632 | 18392 | + | Leucine-rich repeat containing protein                                                | Leucine-rich repeat       |
| 1493 | 3483 | <a href="#">NEOS13_1470</a>   | peg | 3483_18672_20570 | 18672 | 20570 | + | Leucine-rich repeat containing protein                                                | Leucine-rich repeat       |
| 1494 | 3483 | <a href="#">NEOS13_1471</a>   | peg | 3483_20866_22650 | 20866 | 22650 | + | Leucine-rich repeat containing protein                                                | Leucine-rich repeat       |
| 1495 | 3483 | <a href="#">NEOS13_1472</a>   | peg | 3483_22672_22833 | 22672 | 22833 | + | Leucine-rich repeat containing protein                                                | Leucine-rich repeat       |
| 1496 | 3483 | <a href="#">NEOS13_1473</a>   | peg | 3483_22954_22823 | 22954 | 22823 | - | hypothetical protein                                                                  |                           |
| 1497 | 3483 | <a href="#">NEOS13_1474</a>   | peg | 3483_24308_22935 | 24308 | 22935 | - | similar to transport protein                                                          |                           |
| 1498 | 3483 | <a href="#">NEOS13_1475</a>   | peg | 3483_24669_24532 | 24669 | 24532 | - | hypothetical protein                                                                  |                           |
| 1499 | 3483 | <a href="#">NEOS13_1476</a>   | peg | 3483_24854_24738 | 24854 | 24738 | - | hypothetical protein                                                                  |                           |
| 1500 | 3483 | <a href="#">NEOS13_1477</a>   | peg | 3483_24931_25923 | 24931 | 25923 | + | Type III secretion protein SetJ                                                       | T3SA2                     |
| 1501 | 3483 | <a href="#">NEOS13_1478</a>   | peg | 3483_25935_26798 | 25935 | 26798 | + | hypothetical protein                                                                  | T3SA2                     |
| 1502 | 3483 | <a href="#">NEOS13_1479</a>   | peg | 3483_26795_27451 | 26795 | 27451 | + | Type III secretion translocase SetL                                                   | T3SA2                     |
| 1503 | 3483 | <a href="#">NEOS13_1480</a>   | peg | 3483_27444_28331 | 27444 | 28331 | + | Type III secretion inner membrane protein SetR                                        | T3SA2                     |
| 1504 | 3483 | <a href="#">NEOS13_1481</a>   | peg | 3483_28342_28623 | 28342 | 28623 | + | probable type III secretion inner membrane protein SetS                               | T3SA2                     |
| 1505 | 3483 | <a href="#">NEOS13_1482</a>   | peg | 3483_28721_29605 | 28721 | 29605 | + | Type III secretion inner membrane protein SetT                                        | T3SA2                     |
| 1506 | 3483 | <a href="#">NEOS13_1483</a>   | peg | 3483_31242_30448 | 31242 | 30448 | - | Leucine-rich repeat containing protein                                                | Leucine-rich repeat       |
| 1507 | 3484 | <a href="#">NEOS13_1484</a>   | peg | 3484_560_375     | 560   | 375   | - | hypothetical protein                                                                  |                           |
| 1508 | 3484 | <a href="#">NEOS13_1485</a>   | peg | 3484_2118_631    | 2118  | 631   | - | hypothetical protein                                                                  |                           |
| 1509 | 3484 | <a href="#">NEOS13_1486</a>   | peg | 3484_2470_2303   | 2470  | 2303  | - | hypothetical protein                                                                  |                           |
| 1510 | 3484 | <a href="#">NEOS13_1487</a>   | peg | 3484_2536_3036   | 2536  | 3036  | + | ADP-heptose synthase (EC 2.7.-.-) / D-glycero-beta-D-manno-heptose 7-phosphate kinase |                           |
| 1511 | 3484 | <a href="#">NEOS13_1488</a>   | peg | 3484_3048_4226   | 3048  | 4226  | + | putative glpG protein                                                                 |                           |
| 1512 | 3484 | <a href="#">NEOS13_1489</a>   | peg | 3484_4293_5150   | 4293  | 5150  | + | Ribonuclease Z (EC 3.1.26.11)                                                         |                           |
| 1513 | 3484 | <a href="#">NEOS13_1490</a>   | peg | 3484_5162_6157   | 5162  | 6157  | + | Tyrosine recombinase XerC                                                             |                           |
| 1514 | 3484 | <a href="#">NEOS13_1491</a>   | peg | 3484_6409_8004   | 6409  | 8004  | + | ABC transporter ATP-binding protein uup                                               | ABC_transporter           |
| 1515 | 3484 | <a href="#">NEOS13_1492</a>   | peg | 3484_8021_8773   | 8021  | 8773  | + | putative tRNA/rRNA methyltransferase (EC:2.1.1.-)                                     |                           |
| 1516 | 3484 | <a href="#">NEOS13_1493</a>   | peg | 3484_8754_9458   | 8754  | 9458  | + | GTP cyclohydrolase I (EC 3.5.4.16) type 1                                             |                           |
| 1517 | 3484 | <a href="#">NEOS13_1494</a>   | peg | 3484_11104_10331 | 11104 | 10331 | - | FIG137478: Hypothetical protein                                                       |                           |
| 1518 | 3484 | <a href="#">NEOS13_1495</a>   | peg | 3484_11648_13132 | 11648 | 13132 | + | Serine hydroxymethyltransferase (EC 2.1.2.1)                                          |                           |
| 1519 | 3484 | <a href="#">NEOS13_1496</a>   | peg | 3484_13190_13801 | 13190 | 13801 | + | ATP-dependent Clp protease proteolytic subunit (EC 3.4.21.92)                         |                           |
| 1520 | 3484 | <a href="#">NEOS13_1497</a>   | peg | 3484_13951_13838 | 13951 | 13838 | - | hypothetical protein                                                                  |                           |
| 1521 | 3484 | <a href="#">NEOS13_1498</a>   | peg | 3484_13905_14714 | 13905 | 14714 | + | Diaminopimelate epimerase (EC 5.1.1.7)                                                |                           |
| 1522 | 3484 | <a href="#">NEOS13_1499</a>   | peg | 3484_15648_14677 | 15648 | 14677 | - | histone deacetylase superfamily                                                       |                           |
| 1523 | 3484 | <a href="#">NEOS13_1500</a>   | peg | 3484_18519_16330 | 18519 | 16330 | - | hypothetical protein                                                                  |                           |
| 1524 | 3484 | <a href="#">NEOS13_1501</a>   | peg | 3484_19610_19735 | 19610 | 19735 | + | hypothetical protein                                                                  |                           |
| 1525 | 3484 | <a href="#">NEOS13_1502</a>   | peg | 3484_20069_20194 | 20069 | 20194 | + | hypothetical protein                                                                  |                           |
| 1526 | 3484 | <a href="#">NEOS13_1503</a>   | peg | 3484_20302_20418 | 20302 | 20418 | + | hypothetical protein                                                                  |                           |
| 1527 | 3484 | <a href="#">NEOS13_1504</a>   | peg | 3484_20595_20753 | 20595 | 20753 | + | hypothetical protein                                                                  |                           |
| 1528 | 3484 | <a href="#">NEOS13_0024ma</a> | rna | 3484_21686_21604 | 21686 | 21604 | - | tRNA-Leu-TAA                                                                          | RNA                       |
| 1529 | 3484 | <a href="#">NEOS13_1505</a>   | peg | 3484_22716_21748 | 22716 | 21748 | - | hypothetical protein                                                                  |                           |
| 1530 | 3484 | <a href="#">NEOS13_1506</a>   | peg | 3484_23815_22805 | 23815 | 22805 | - | NAD-dependent glyceraldehyde-3-phosphate dehydrogenase (EC 1.2.1.12)                  | Glycolysis_Gluconogenesis |
| 1531 | 3484 | <a href="#">NEOS13_1507</a>   | peg | 3484_24057_26183 | 24057 | 26183 | + | hypothetical protein                                                                  |                           |
| 1532 | 3487 | <a href="#">NEOS13_1508</a>   | peg | 3487_70_1125     | 70    | 1125  | + | Leucine-rich repeat containing protein                                                | Leucine-rich repeat       |
| 1533 | 3488 | <a href="#">NEOS13_1509</a>   | peg | 3488_22_402      | 22    | 402   | + | Leucine-rich repeat containing protein                                                | Leucine-rich repeat       |
| 1534 | 3489 | <a href="#">NEOS13_1510</a>   | peg | 3489_797_675     | 797   | 675   | - | hypothetical protein                                                                  |                           |

|      |      |                               |     |                  |       |       |   |                                                                              |                     |
|------|------|-------------------------------|-----|------------------|-------|-------|---|------------------------------------------------------------------------------|---------------------|
| 1535 | 3489 | <a href="#">NEOS13_1511</a>   | peg | 3489_1233_3203   | 1233  | 3203  | + | hypothetical protein                                                         |                     |
| 1536 | 3489 | <a href="#">NEOS13_1512</a>   | peg | 3489_3658_3209   | 3658  | 3209  | - | hypothetical protein                                                         |                     |
| 1537 | 3490 | <a href="#">NEOS13_1513</a>   | peg | 3490_33_302      | 33    | 302   | + | hypothetical protein                                                         |                     |
| 1538 | 3491 | <a href="#">NEOS13_1514</a>   | peg | 3491_115_246     | 115   | 246   | + | hypothetical protein                                                         |                     |
| 1539 | 3491 | <a href="#">NEOS13_1515</a>   | peg | 3491_1342_683    | 1342  | 683   | - | Queuosine Biosynthesis QueC ATPase                                           |                     |
| 1540 | 3491 | <a href="#">NEOS13_1516</a>   | peg | 3491_1992_1345   | 1992  | 1345  | - | Queuosine Biosynthesis QueE Radical SAM                                      |                     |
| 1541 | 3491 | <a href="#">NEOS13_1517</a>   | peg | 3491_2303_4144   | 2303  | 4144  | + | ankyrin repeat protein                                                       | Ankyrin             |
| 1542 | 3491 | <a href="#">NEOS13_1518</a>   | peg | 3491_4212_4325   | 4212  | 4325  | + | hypothetical protein                                                         |                     |
| 1543 | 3491 | <a href="#">NEOS13_1519</a>   | peg | 3491_4327_4440   | 4327  | 4440  | + | hypothetical protein                                                         |                     |
| 1544 | 3491 | <a href="#">NEOS13_1520</a>   | peg | 3491_4533_5543   | 4533  | 5543  | + | Malate dehydrogenase (EC 1.1.1.37)                                           | TCA                 |
| 1545 | 3491 | <a href="#">NEOS13_1521</a>   | peg | 3491_5802_6629   | 5802  | 6629  | + | hypothetical protein                                                         |                     |
| 1546 | 3491 | <a href="#">NEOS13_1522</a>   | peg | 3491_7802_6786   | 7802  | 6786  | - | hypothetical protein                                                         |                     |
| 1547 | 3491 | <a href="#">NEOS13_1523</a>   | peg | 3491_8019_8204   | 8019  | 8204  | + | hypothetical protein                                                         |                     |
| 1548 | 3491 | <a href="#">NEOS13_1524</a>   | peg | 3491_8201_9007   | 8201  | 9007  | + | Metal-dependent hydrolases of the beta-lactamase superfamily I; PhnP protein |                     |
| 1549 | 3491 | <a href="#">NEOS13_1525</a>   | peg | 3491_9019_10344  | 9019  | 10344 | + | GTP-binding protein HflX                                                     |                     |
| 1550 | 3491 | <a href="#">NEOS13_1526</a>   | peg | 3491_12112_10634 | 12112 | 10634 | - | Cytosol aminopeptidase PepA (EC 3.4.11.1)                                    |                     |
| 1551 | 3491 | <a href="#">NEOS13_1527</a>   | peg | 3491_12651_12133 | 12651 | 12133 | - | Single-stranded DNA-binding protein                                          |                     |
| 1552 | 3491 | <a href="#">NEOS13_1528</a>   | peg | 3491_12863_12708 | 12863 | 12708 | - | hypothetical protein                                                         |                     |
| 1553 | 3491 | <a href="#">NEOS13_1529</a>   | peg | 3491_13597_13076 | 13597 | 13076 | - | FIG00493912: hypothetical protein                                            |                     |
| 1554 | 3491 | <a href="#">NEOS13_1530</a>   | peg | 3491_14109_16154 | 14109 | 16154 | + | Glycogen debranching enzyme (EC 3.2.1.-)                                     |                     |
| 1555 | 3491 | <a href="#">NEOS13_1531</a>   | peg | 3491_16814_16683 | 16814 | 16683 | - | hypothetical protein                                                         |                     |
| 1556 | 3491 | <a href="#">NEOS13_1532</a>   | peg | 3491_17049_19325 | 17049 | 19325 | + | hypothetical protein                                                         |                     |
| 1557 | 3491 | <a href="#">NEOS13_1533</a>   | peg | 3491_21274_19661 | 21274 | 19661 | - | DNA repair protein RecN                                                      |                     |
| 1558 | 3491 | <a href="#">NEOS13_1534</a>   | peg | 3491_21376_21537 | 21376 | 21537 | + | hypothetical protein                                                         |                     |
| 1559 | 3491 | <a href="#">NEOS13_1535</a>   | peg | 3491_22633_21719 | 22633 | 21719 | - | Ribonuclease HIII (EC 3.1.26.4)                                              |                     |
| 1560 | 3491 | <a href="#">NEOS13_1536</a>   | peg | 3491_22735_23145 | 22735 | 23145 | + | FIG00899448: hypothetical protein                                            |                     |
| 1561 | 3491 | <a href="#">NEOS13_1537</a>   | peg | 3491_23290_23174 | 23290 | 23174 | - | hypothetical protein                                                         |                     |
| 1562 | 3491 | <a href="#">NEOS13_1538</a>   | peg | 3491_23436_24380 | 23436 | 24380 | + | hypothetical protein                                                         |                     |
| 1563 | 3491 | <a href="#">NEOS13_1539</a>   | peg | 3491_25251_24637 | 25251 | 24637 | - | tRNA pseudouridine synthase A (EC 4.2.1.70)                                  |                     |
| 1564 | 3491 | <a href="#">NEOS13_1540</a>   | peg | 3491_25383_25264 | 25383 | 25264 | - | hypothetical protein                                                         |                     |
| 1565 | 3491 | <a href="#">NEOS13_1541</a>   | peg | 3491_26010_25411 | 26010 | 25411 | - | FIG00899512: hypothetical protein                                            |                     |
| 1566 | 3491 | <a href="#">NEOS13_1542</a>   | peg | 3491_26620_26021 | 26620 | 26021 | - | FIG00899458: hypothetical protein                                            |                     |
| 1567 | 3491 | <a href="#">NEOS13_1543</a>   | peg | 3491_28662_27241 | 28662 | 27241 | - | hypothetical protein                                                         |                     |
| 1568 | 3491 | <a href="#">NEOS13_1544</a>   | peg | 3491_28791_28973 | 28791 | 28973 | + | hypothetical protein                                                         |                     |
| 1569 | 3491 | <a href="#">NEOS13_1545</a>   | peg | 3491_29932_29051 | 29932 | 29051 | - | hypothetical protein                                                         |                     |
| 1570 | 3491 | <a href="#">NEOS13_1546</a>   | peg | 3491_31369_30338 | 31369 | 30338 | - | hypothetical protein                                                         |                     |
| 1571 | 3491 | <a href="#">NEOS13_1547</a>   | peg | 3491_32556_31396 | 32556 | 31396 | - | hypothetical protein                                                         |                     |
| 1572 | 3491 | <a href="#">NEOS13_1548</a>   | peg | 3491_33122_32571 | 33122 | 32571 | - | hypothetical protein                                                         |                     |
| 1573 | 3491 | <a href="#">NEOS13_1549</a>   | peg | 3491_33604_34962 | 33604 | 34962 | + | hypothetical protein                                                         |                     |
| 1574 | 3491 | <a href="#">NEOS13_1550</a>   | peg | 3491_34972_35973 | 34972 | 35973 | + | Holliday junction DNA helicase RuvB                                          |                     |
| 1575 | 3491 | <a href="#">NEOS13_1551</a>   | peg | 3491_36168_35956 | 36168 | 35956 | - | hypothetical protein                                                         |                     |
| 1576 | 3491 | <a href="#">NEOS13_1552</a>   | peg | 3491_36143_36826 | 36143 | 36826 | + | hypothetical protein                                                         |                     |
| 1577 | 3491 | <a href="#">NEOS13_1553</a>   | peg | 3491_37080_38117 | 37080 | 38117 | + | S-adenosylmethionine:tRNA ribosyltransferase-isomerase (EC 5.-.-.)           |                     |
| 1578 | 3491 | <a href="#">NEOS13_1554</a>   | peg | 3491_38657_40723 | 38657 | 40723 | + | hypothetical protein                                                         |                     |
| 1579 | 3491 | <a href="#">NEOS13_1555</a>   | peg | 3491_40736_40861 | 40736 | 40861 | + | hypothetical protein                                                         |                     |
| 1580 | 3491 | <a href="#">NEOS13_1556</a>   | peg | 3491_41058_42740 | 41058 | 42740 | + | Leucine-rich repeat containing protein                                       | Leucine-rich repeat |
| 1581 | 3491 | <a href="#">NEOS13_1557</a>   | peg | 3491_43203_44732 | 43203 | 44732 | + | Thermostable carboxypeptidase 1 (EC 3.4.17.19)                               |                     |
| 1582 | 3491 | <a href="#">NEOS13_1558</a>   | peg | 3491_44933_46399 | 44933 | 46399 | + | Leucine-rich repeat containing protein                                       | Leucine-rich repeat |
| 1583 | 3491 | <a href="#">NEOS13_0025ma</a> | rna | 3491_46787_46873 | 46787 | 46873 | + | tRNA-Ser-TGA                                                                 | RNA                 |
| 1584 | 3491 | <a href="#">NEOS13_1559</a>   | peg | 3491_48259_47477 | 48259 | 47477 | - | hypothetical protein                                                         |                     |
| 1585 | 3492 | <a href="#">NEOS13_1560</a>   | peg | 3492_115_246     | 115   | 246   | + | hypothetical protein                                                         |                     |
| 1586 | 3492 | <a href="#">NEOS13_1561</a>   | peg | 3492_1342_683    | 1342  | 683   | - | Queuosine Biosynthesis QueC ATPase                                           |                     |
| 1587 | 3492 | <a href="#">NEOS13_1562</a>   | peg | 3492_1992_1345   | 1992  | 1345  | - | Queuosine Biosynthesis QueE Radical SAM                                      |                     |
| 1588 | 3492 | <a href="#">NEOS13_1563</a>   | peg | 3492_2303_4144   | 2303  | 4144  | + | ankyrin repeat protein                                                       | Ankyrin             |
| 1589 | 3492 | <a href="#">NEOS13_1564</a>   | peg | 3492_4212_4325   | 4212  | 4325  | + | hypothetical protein                                                         |                     |
| 1590 | 3492 | <a href="#">NEOS13_1565</a>   | peg | 3492_4327_4440   | 4327  | 4440  | + | hypothetical protein                                                         |                     |
| 1591 | 3492 | <a href="#">NEOS13_1566</a>   | peg | 3492_4533_5543   | 4533  | 5543  | + | Malate dehydrogenase (EC 1.1.1.37)                                           | TCA                 |
| 1592 | 3492 | <a href="#">NEOS13_1567</a>   | peg | 3492_5802_6629   | 5802  | 6629  | + | hypothetical protein                                                         |                     |
| 1593 | 3492 | <a href="#">NEOS13_1568</a>   | peg | 3492_7802_6786   | 7802  | 6786  | - | hypothetical protein                                                         |                     |
| 1594 | 3492 | <a href="#">NEOS13_1569</a>   | peg | 3492_8019_8204   | 8019  | 8204  | + | hypothetical protein                                                         |                     |
| 1595 | 3492 | <a href="#">NEOS13_1570</a>   | peg | 3492_8201_9007   | 8201  | 9007  | + | Metal-dependent hydrolases of the beta-lactamase superfamily I; PhnP protein |                     |
| 1596 | 3492 | <a href="#">NEOS13_1571</a>   | peg | 3492_9019_10344  | 9019  | 10344 | + | GTP-binding protein HflX                                                     |                     |
| 1597 | 3492 | <a href="#">NEOS13_1572</a>   | peg | 3492_12112_10634 | 12112 | 10634 | - | Cytosol aminopeptidase PepA (EC 3.4.11.1)                                    |                     |
| 1598 | 3492 | <a href="#">NEOS13_1573</a>   | peg | 3492_12651_12133 | 12651 | 12133 | - | Single-stranded DNA-binding protein                                          |                     |
| 1599 | 3492 | <a href="#">NEOS13_1574</a>   | peg | 3492_12863_12708 | 12863 | 12708 | - | hypothetical protein                                                         |                     |
| 1600 | 3492 | <a href="#">NEOS13_1575</a>   | peg | 3492_13597_13076 | 13597 | 13076 | - | FIG00493912: hypothetical protein                                            |                     |
| 1601 | 3492 | <a href="#">NEOS13_1576</a>   | peg | 3492_14109_16154 | 14109 | 16154 | + | Glycogen debranching enzyme (EC 3.2.1.-)                                     |                     |
| 1602 | 3492 | <a href="#">NEOS13_1577</a>   | peg | 3492_16814_16683 | 16814 | 16683 | - | hypothetical protein                                                         |                     |
| 1603 | 3492 | <a href="#">NEOS13_1578</a>   | peg | 3492_17049_19325 | 17049 | 19325 | + | hypothetical protein                                                         |                     |
| 1604 | 3492 | <a href="#">NEOS13_1579</a>   | peg | 3492_21274_19661 | 21274 | 19661 | - | DNA repair protein RecN                                                      |                     |
| 1605 | 3492 | <a href="#">NEOS13_1580</a>   | peg | 3492_21376_21537 | 21376 | 21537 | + | hypothetical protein                                                         |                     |
| 1606 | 3492 | <a href="#">NEOS13_1581</a>   | peg | 3492_22633_21719 | 22633 | 21719 | - | Ribonuclease HIII (EC 3.1.26.4)                                              |                     |
| 1607 | 3492 | <a href="#">NEOS13_1582</a>   | peg | 3492_22735_23145 | 22735 | 23145 | + | FIG00899448: hypothetical protein                                            |                     |



|      |      |                               |     |                  |       |       |   |                                                                                      |                         |
|------|------|-------------------------------|-----|------------------|-------|-------|---|--------------------------------------------------------------------------------------|-------------------------|
| 1608 | 3492 | <a href="#">NEOS13_1583</a>   | peg | 3492_23290_23174 | 23290 | 23174 | - | hypothetical protein                                                                 |                         |
| 1609 | 3492 | <a href="#">NEOS13_1584</a>   | peg | 3492_23436_24380 | 23436 | 24380 | + | hypothetical protein                                                                 |                         |
| 1610 | 3492 | <a href="#">NEOS13_1585</a>   | peg | 3492_25251_24637 | 25251 | 24637 | - | tRNA pseudouridine synthase A (EC 4.2.1.70)                                          |                         |
| 1611 | 3492 | <a href="#">NEOS13_1586</a>   | peg | 3492_25383_25264 | 25383 | 25264 | - | hypothetical protein                                                                 |                         |
| 1612 | 3492 | <a href="#">NEOS13_1587</a>   | peg | 3492_26010_25411 | 26010 | 25411 | - | FIG00899512: hypothetical protein                                                    |                         |
| 1613 | 3492 | <a href="#">NEOS13_1588</a>   | peg | 3492_26620_26021 | 26620 | 26021 | - | FIG00899458: hypothetical protein                                                    |                         |
| 1614 | 3492 | <a href="#">NEOS13_1589</a>   | peg | 3492_28662_27241 | 28662 | 27241 | - | hypothetical protein                                                                 |                         |
| 1615 | 3492 | <a href="#">NEOS13_1590</a>   | peg | 3492_28791_28973 | 28791 | 28973 | + | hypothetical protein                                                                 |                         |
| 1616 | 3492 | <a href="#">NEOS13_1591</a>   | peg | 3492_29932_29051 | 29932 | 29051 | - | hypothetical protein                                                                 |                         |
| 1617 | 3492 | <a href="#">NEOS13_1592</a>   | peg | 3492_31369_30338 | 31369 | 30338 | - | hypothetical protein                                                                 |                         |
| 1618 | 3492 | <a href="#">NEOS13_1593</a>   | peg | 3492_32556_31396 | 32556 | 31396 | - | hypothetical protein                                                                 |                         |
| 1619 | 3492 | <a href="#">NEOS13_1594</a>   | peg | 3492_33122_32571 | 33122 | 32571 | - | hypothetical protein                                                                 |                         |
| 1620 | 3492 | <a href="#">NEOS13_1595</a>   | peg | 3492_33604_34962 | 33604 | 34962 | + | hypothetical protein                                                                 |                         |
| 1621 | 3492 | <a href="#">NEOS13_1596</a>   | peg | 3492_34972_35973 | 34972 | 35973 | + | Holliday junction DNA helicase RuvB                                                  |                         |
| 1622 | 3492 | <a href="#">NEOS13_1597</a>   | peg | 3492_36168_35956 | 36168 | 35956 | - | hypothetical protein                                                                 |                         |
| 1623 | 3492 | <a href="#">NEOS13_1598</a>   | peg | 3492_36143_36826 | 36143 | 36826 | + | hypothetical protein                                                                 |                         |
| 1624 | 3492 | <a href="#">NEOS13_1599</a>   | peg | 3492_37080_38117 | 37080 | 38117 | + | S-adenosylmethionine:tRNA ribosyltransferase-isomerase (EC 5.-.-.-)                  |                         |
| 1625 | 3492 | <a href="#">NEOS13_1600</a>   | peg | 3492_38657_40723 | 38657 | 40723 | + | hypothetical protein                                                                 |                         |
| 1626 | 3492 | <a href="#">NEOS13_1601</a>   | peg | 3492_40736_40861 | 40736 | 40861 | + | hypothetical protein                                                                 |                         |
| 1627 | 3492 | <a href="#">NEOS13_1602</a>   | peg | 3492_41058_42740 | 41058 | 42740 | + | Leucine-rich repeat containing protein                                               | Leucine-rich repeat     |
| 1628 | 3492 | <a href="#">NEOS13_1603</a>   | peg | 3492_43203_44732 | 43203 | 44732 | + | Thermostable carboxypeptidase 1 (EC 3.4.17.19)                                       |                         |
| 1629 | 3492 | <a href="#">NEOS13_1604</a>   | peg | 3492_44933_46399 | 44933 | 46399 | + | Leucine-rich repeat containing protein                                               | Leucine-rich repeat     |
| 1630 | 3492 | <a href="#">NEOS13_0026ma</a> | rma | 3492_46787_46873 | 46787 | 46873 | + | tRNA-Ser-TGA                                                                         | RNA                     |
| 1631 | 3492 | <a href="#">NEOS13_1605</a>   | peg | 3492_48259_47477 | 48259 | 47477 | - | hypothetical protein                                                                 |                         |
| 1632 | 3493 | <a href="#">NEOS13_1606</a>   | peg | 3493_1982_1038   | 1982  | 1038  | - | hypothetical protein                                                                 |                         |
| 1633 | 3493 | <a href="#">NEOS13_1607</a>   | peg | 3493_2808_2215   | 2808  | 2215  | - | hypothetical protein                                                                 |                         |
| 1634 | 3493 | <a href="#">NEOS13_1608</a>   | peg | 3493_3859_2864   | 3859  | 2864  | - | hypothetical protein                                                                 |                         |
| 1635 | 3493 | <a href="#">NEOS13_1609</a>   | peg | 3493_4976_3888   | 4976  | 3888  | - | hypothetical protein                                                                 |                         |
| 1636 | 3495 | <a href="#">NEOS13_1610</a>   | peg | 3495_399_623     | 399   | 623   | + | transposase                                                                          | Transposase             |
| 1637 | 3495 | <a href="#">NEOS13_1611</a>   | peg | 3495_843_3065    | 843   | 3065  | + | hypothetical protein                                                                 |                         |
| 1638 | 3495 | <a href="#">NEOS13_1612</a>   | peg | 3495_3236_3421   | 3236  | 3421  | + | hypothetical protein                                                                 |                         |
| 1639 | 3495 | <a href="#">NEOS13_1613</a>   | peg | 3495_4053_3610   | 4053  | 3610  | - | hypothetical protein                                                                 |                         |
| 1640 | 3495 | <a href="#">NEOS13_1614</a>   | peg | 3495_5128_4067   | 5128  | 4067  | - | 2-keto-3-deoxy-D-arabino-heptulosonate-7-phosphate synthase I alpha (EC 2.5.1.54)    |                         |
| 1641 | 3495 | <a href="#">NEOS13_1615</a>   | peg | 3495_5320_6873   | 5320  | 6873  | + | hypothetical protein                                                                 |                         |
| 1642 | 3495 | <a href="#">NEOS13_1616</a>   | peg | 3495_7045_8436   | 7045  | 8436  | + | Sodium/glycine symporter GlyP                                                        |                         |
| 1643 | 3495 | <a href="#">NEOS13_1617</a>   | peg | 3495_9408_9875   | 9408  | 9875  | + | Sodium/glycine symporter GlyP                                                        |                         |
| 1644 | 3496 | <a href="#">NEOS13_1618</a>   | peg | 3496_46_1302     | 46    | 1302  | + | DNA polymerase III beta subunit (EC 2.7.7.7)                                         |                         |
| 1645 | 3497 | <a href="#">NEOS13_1619</a>   | peg | 3497_120_251     | 120   | 251   | + | hypothetical protein                                                                 |                         |
| 1646 | 3497 | <a href="#">NEOS13_1620</a>   | peg | 3497_437_781     | 437   | 781   | + | Uncharacterized protein y4pE/y4sA                                                    |                         |
| 1647 | 3497 | <a href="#">NEOS13_1621</a>   | peg | 3497_1539_904    | 1539  | 904   | - | Pyridoxamine 5'-phosphate oxidase (EC 1.4.3.5)                                       |                         |
| 1648 | 3497 | <a href="#">NEOS13_1622</a>   | peg | 3497_1657_2859   | 1657  | 2859  | + | Phosphoglycerate kinase (EC 2.7.2.3)                                                 | Glycolysis Glucogenesis |
| 1649 | 3497 | <a href="#">NEOS13_1623</a>   | peg | 3497_3186_4784   | 3186  | 4784  | + | ADP/ATP Translocase, NTT1                                                            | NTT                     |
| 1650 | 3497 | <a href="#">NEOS13_1624</a>   | peg | 3497_4983_6551   | 4983  | 6551  | + | ADP/ATP Translocase, NTT1                                                            | NTT                     |
| 1651 | 3497 | <a href="#">NEOS13_1625</a>   | peg | 3497_6753_6890   | 6753  | 6890  | + | hypothetical protein                                                                 |                         |
| 1652 | 3497 | <a href="#">NEOS13_1626</a>   | peg | 3497_7602_7189   | 7602  | 7189  | - | CDP-alcohol phosphatidyltransferase                                                  |                         |
| 1653 | 3497 | <a href="#">NEOS13_1627</a>   | peg | 3497_7592_7705   | 7592  | 7705  | + | hypothetical protein                                                                 |                         |
| 1654 | 3497 | <a href="#">NEOS13_1628</a>   | peg | 3497_8471_9106   | 8471  | 9106  | + | hypothetical protein                                                                 |                         |
| 1655 | 3497 | <a href="#">NEOS13_1629</a>   | peg | 3497_10341_9418  | 10341 | 9418  | - | hypothetical protein                                                                 |                         |
| 1656 | 3497 | <a href="#">NEOS13_1630</a>   | peg | 3497_11905_10631 | 11905 | 10631 | - | hypothetical protein                                                                 |                         |
| 1657 | 3497 | <a href="#">NEOS13_1631</a>   | peg | 3497_13514_12420 | 13514 | 12420 | - | hypothetical protein                                                                 |                         |
| 1658 | 3497 | <a href="#">NEOS13_1632</a>   | peg | 3497_15069_13552 | 15069 | 13552 | - | Glutamyl-tRNA synthetase (EC 6.1.1.17) @ Glutamyl-tRNA(Gln) synthetase (EC 6.1.1.24) |                         |
| 1659 | 3497 | <a href="#">NEOS13_1633</a>   | peg | 3497_17232_15283 | 17232 | 15283 | - | Peptidase, S41 family                                                                |                         |
| 1660 | 3497 | <a href="#">NEOS13_1634</a>   | peg | 3497_17586_18014 | 17586 | 18014 | + | CHLPS Euo Protein                                                                    |                         |
| 1661 | 3497 | <a href="#">NEOS13_1635</a>   | peg | 3497_21632_18657 | 21632 | 18657 | - | metalloprotease, insulinase family                                                   |                         |
| 1662 | 3497 | <a href="#">NEOS13_1636</a>   | peg | 3497_21908_22759 | 21908 | 22759 | + | CDP-diacylglycerol--serine O-phosphatidyltransferase (EC 2.7.8.8)                    |                         |
| 1663 | 3497 | <a href="#">NEOS13_1637</a>   | peg | 3497_23520_22993 | 23520 | 22993 | - | SOS-response repressor and protease LexA (EC 3.4.21.88)                              |                         |
| 1664 | 3497 | <a href="#">NEOS13_1638</a>   | peg | 3497_24283_23585 | 24283 | 23585 | - | hypothetical protein                                                                 |                         |
| 1665 | 3497 | <a href="#">NEOS13_1639</a>   | peg | 3497_25214_26644 | 25214 | 26644 | + | DNA recombination protein RmuC                                                       |                         |
| 1666 | 3497 | <a href="#">NEOS13_1640</a>   | peg | 3497_28017_26752 | 28017 | 26752 | - | hypothetical protein                                                                 |                         |
| 1667 | 3497 | <a href="#">NEOS13_1641</a>   | peg | 3497_28929_28225 | 28929 | 28225 | - | hypothetical protein                                                                 |                         |
| 1668 | 3497 | <a href="#">NEOS13_1642</a>   | peg | 3497_29268_30566 | 29268 | 30566 | + | Predicted ATPase related to phosphate starvation-inducible protein PhoH              |                         |
| 1669 | 3497 | <a href="#">NEOS13_1643</a>   | peg | 3497_30805_31425 | 30805 | 31425 | + | putative exopolysaccharide synthesis protein                                         |                         |
| 1670 | 3497 | <a href="#">NEOS13_1644</a>   | peg | 3497_31933_32301 | 31933 | 32301 | + | hypothetical protein                                                                 |                         |
| 1671 | 3497 | <a href="#">NEOS13_1645</a>   | peg | 3497_32508_32768 | 32508 | 32768 | + | hypothetical protein                                                                 |                         |
| 1672 | 3497 | <a href="#">NEOS13_1646</a>   | peg | 3497_33883_32861 | 33883 | 32861 | - | hypothetical protein                                                                 |                         |
| 1673 | 3497 | <a href="#">NEOS13_1647</a>   | peg | 3497_34488_33880 | 34488 | 33880 | - | hypothetical protein                                                                 |                         |
| 1674 | 3497 | <a href="#">NEOS13_1648</a>   | peg | 3497_34771_35091 | 34771 | 35091 | + | hypothetical protein                                                                 |                         |
| 1675 | 3497 | <a href="#">NEOS13_1649</a>   | peg | 3497_35407_35117 | 35407 | 35117 | - | putative Mitomycin resistance protein mcrB                                           |                         |
| 1676 | 3497 | <a href="#">NEOS13_1650</a>   | peg | 3497_36092_35955 | 36092 | 35955 | - | hypothetical protein                                                                 |                         |
| 1677 | 3497 | <a href="#">NEOS13_1651</a>   | peg | 3497_36334_39456 | 36334 | 39456 | + | Isoleucyl-tRNA synthetase (EC 6.1.1.5)                                               |                         |
| 1678 | 3497 | <a href="#">NEOS13_1652</a>   | peg | 3497_40079_41038 | 40079 | 41038 | + | Arabinose 5-phosphate isomerase (EC 5.3.1.13)                                        |                         |

|      |      |                               |     |                  |       |       |   |                                                                            |                        |
|------|------|-------------------------------|-----|------------------|-------|-------|---|----------------------------------------------------------------------------|------------------------|
| 1679 | 3497 | <a href="#">NEOS13_1653</a>   | peg | 3497_41817_41260 | 41817 | 41260 | - | hypothetical protein                                                       |                        |
| 1680 | 3497 | <a href="#">NEOS13_1654</a>   | peg | 3497_41896_43185 | 41896 | 43185 | + | Na+/H+ antiporter NhaD type                                                |                        |
| 1681 | 3497 | <a href="#">NEOS13_0027ma</a> | rna | 3497_44355_45893 | 44355 | 45893 | + | Small Subunit Ribosomal RNA; ssuRNA; SSU rRNA                              | RNA                    |
| 1682 | 3498 | <a href="#">NEOS13_1655</a>   | peg | 3498_2066_726    | 2066  | 726   | - | Leucine-rich repeat containing protein                                     | Leucine-rich repeat    |
| 1683 | 3498 | <a href="#">NEOS13_1656</a>   | peg | 3498_2291_2175   | 2291  | 2175  | - | hypothetical protein                                                       |                        |
| 1684 | 3498 | <a href="#">NEOS13_1657</a>   | peg | 3498_2454_2323   | 2454  | 2323  | - | hypothetical protein                                                       |                        |
| 1685 | 3498 | <a href="#">NEOS13_1658</a>   | peg | 3498_3058_2942   | 3058  | 2942  | - | hypothetical protein                                                       |                        |
| 1686 | 3498 | <a href="#">NEOS13_1659</a>   | peg | 3498_3200_3355   | 3200  | 3355  | + | Mobile element protein                                                     |                        |
| 1687 | 3498 | <a href="#">NEOS13_1660</a>   | peg | 3498_3572_3432   | 3572  | 3432  | - | hypothetical protein                                                       |                        |
| 1688 | 3498 | <a href="#">NEOS13_1661</a>   | peg | 3498_6032_4236   | 6032  | 4236  | - | hypothetical protein                                                       |                        |
| 1689 | 3498 | <a href="#">NEOS13_1662</a>   | peg | 3498_6403_6564   | 6403  | 6564  | + | hypothetical protein                                                       |                        |
| 1690 | 3498 | <a href="#">NEOS13_1663</a>   | peg | 3498_6816_10238  | 6816  | 10238 | + | Exodeoxyribonuclease V gamma chain (EC 3.1.11.5)                           |                        |
| 1691 | 3498 | <a href="#">NEOS13_1664</a>   | peg | 3498_10398_11219 | 10398 | 11219 | + | hypothetical protein                                                       |                        |
| 1692 | 3498 | <a href="#">NEOS13_1665</a>   | peg | 3498_12358_15864 | 12358 | 15864 | + | Exodeoxyribonuclease V beta chain (EC 3.1.11.5)                            |                        |
| 1693 | 3498 | <a href="#">NEOS13_1666</a>   | peg | 3498_15921_17669 | 15921 | 17669 | + | Exodeoxyribonuclease V alpha chain (EC 3.1.11.5)                           |                        |
| 1694 | 3498 | <a href="#">NEOS13_1667</a>   | peg | 3498_18503_18114 | 18503 | 18114 | - | hypothetical protein                                                       |                        |
| 1695 | 3498 | <a href="#">NEOS13_1668</a>   | peg | 3498_19750_18581 | 19750 | 18581 | - | hypothetical protein                                                       |                        |
| 1696 | 3498 | <a href="#">NEOS13_1669</a>   | peg | 3498_21097_20612 | 21097 | 20612 | - | hypothetical protein                                                       |                        |
| 1697 | 3498 | <a href="#">NEOS13_1670</a>   | peg | 3498_21255_21392 | 21255 | 21392 | + | hypothetical protein                                                       |                        |
| 1698 | 3498 | <a href="#">NEOS13_1671</a>   | peg | 3498_21409_23574 | 21409 | 23574 | + | Transcription elongation factor GreA                                       |                        |
| 1699 | 3498 | <a href="#">NEOS13_1672</a>   | peg | 3498_23575_24183 | 23575 | 24183 | + | Nucleoside 5-triphosphatase RdgB (dHATP, dTTP, XTP-specific) (EC 3.6.1.15) |                        |
| 1700 | 3498 | <a href="#">NEOS13_1673</a>   | peg | 3498_24192_24887 | 24192 | 24887 | + | hypothetical protein                                                       |                        |
| 1701 | 3498 | <a href="#">NEOS13_1674</a>   | peg | 3498_25097_26080 | 25097 | 26080 | + | hypothetical protein                                                       |                        |
| 1702 | 3498 | <a href="#">NEOS13_0028ma</a> | rna | 3498_26225_26297 | 26225 | 26297 | + | tRNA-Ala-GGC                                                               | RNA                    |
| 1703 | 3498 | <a href="#">NEOS13_1675</a>   | peg | 3498_26377_26526 | 26377 | 26526 | + | hypothetical protein                                                       |                        |
| 1704 | 3498 | <a href="#">NEOS13_1676</a>   | peg | 3498_27001_26768 | 27001 | 26768 | - | hypothetical protein                                                       |                        |
| 1705 | 3498 | <a href="#">NEOS13_1677</a>   | peg | 3498_27870_27142 | 27870 | 27142 | - | hypothetical protein                                                       |                        |
| 1706 | 3498 | <a href="#">NEOS13_1678</a>   | peg | 3498_28664_27933 | 28664 | 27933 | - | hypothetical protein                                                       |                        |
| 1707 | 3498 | <a href="#">NEOS13_1679</a>   | peg | 3498_28664_28780 | 28664 | 28780 | + | hypothetical protein                                                       |                        |
| 1708 | 3498 | <a href="#">NEOS13_1680</a>   | peg | 3498_30024_29065 | 30024 | 29065 | - | hypothetical protein                                                       |                        |
| 1709 | 3498 | <a href="#">NEOS13_1681</a>   | peg | 3498_31885_30443 | 31885 | 30443 | - | hypothetical protein                                                       | Outer membrane protein |
| 1710 | 3498 | <a href="#">NEOS13_1682</a>   | peg | 3498_35714_32775 | 35714 | 32775 | - | hypothetical protein                                                       |                        |
| 1711 | 3498 | <a href="#">NEOS13_1683</a>   | peg | 3498_36733_35912 | 36733 | 35912 | - | hypothetical protein                                                       |                        |
| 1712 | 3498 | <a href="#">NEOS13_1684</a>   | peg | 3498_37056_38993 | 37056 | 38993 | + | Threonyl-tRNA synthetase (EC 6.1.1.3)                                      |                        |
| 1713 | 3498 | <a href="#">NEOS13_1685</a>   | peg | 3498_38981_39733 | 38981 | 39733 | + | Septum site-determining protein MinD                                       |                        |
| 1714 | 3498 | <a href="#">NEOS13_1686</a>   | peg | 3498_39870_40616 | 39870 | 40616 | + | Virulence plasmid protein pGP6-D                                           |                        |
| 1715 | 3498 | <a href="#">NEOS13_1687</a>   | peg | 3498_41205_41089 | 41205 | 41089 | - | hypothetical protein                                                       |                        |
| 1716 | 3498 | <a href="#">NEOS13_1688</a>   | peg | 3498_41253_41399 | 41253 | 41399 | + | hypothetical protein                                                       |                        |
| 1717 | 3498 | <a href="#">NEOS13_1689</a>   | peg | 3498_41528_42235 | 41528 | 42235 | + | hypothetical protein                                                       |                        |
| 1718 | 3499 | <a href="#">NEOS13_1690</a>   | peg | 3499_2347_305    | 2347  | 305   | - | Leucine-rich repeat containing protein                                     | Leucine-rich repeat    |
| 1719 | 3500 | <a href="#">NEOS13_1691</a>   | peg | 3500_424_245     | 424   | 245   | - | hypothetical protein                                                       |                        |
| 1720 | 3500 | <a href="#">NEOS13_1692</a>   | peg | 3500_823_431     | 823   | 431   | - | transposase, IS4 family                                                    | Transposase            |
| 1721 | 3500 | <a href="#">NEOS13_1693</a>   | peg | 3500_822_938     | 822   | 938   | + | hypothetical protein                                                       |                        |
| 1722 | 3500 | <a href="#">NEOS13_1694</a>   | peg | 3500_2200_1268   | 2200  | 1268  | - | Mobile element protein                                                     |                        |
| 1723 | 3501 | <a href="#">NEOS13_1695</a>   | peg | 3501_1651_503    | 1651  | 503   | - | Leucine-rich repeat containing protein                                     | Leucine-rich repeat    |
| 1724 | 3502 | <a href="#">NEOS13_1696</a>   | peg | 3502_1656_370    | 1656  | 370   | - | Leucine-rich repeat containing protein                                     | Leucine-rich repeat    |
| 1725 | 3504 | <a href="#">NEOS13_1697</a>   | peg | 3504_20_202      | 20    | 202   | + | hypothetical protein                                                       |                        |
| 1726 | 3504 | <a href="#">NEOS13_1698</a>   | peg | 3504_637_524     | 637   | 524   | - | hypothetical protein                                                       |                        |
| 1727 | 3504 | <a href="#">NEOS13_1699</a>   | peg | 3504_1990_1133   | 1990  | 1133  | - | AMP nucleosidase (EC 3.2.2.4)                                              |                        |
| 1728 | 3504 | <a href="#">NEOS13_1700</a>   | peg | 3504_3635_2406   | 3635  | 2406  | - | hypothetical protein                                                       |                        |
| 1729 | 3504 | <a href="#">NEOS13_1701</a>   | peg | 3504_3877_5481   | 3877  | 5481  | + | Peptide chain release factor 3                                             |                        |
| 1730 | 3504 | <a href="#">NEOS13_1702</a>   | peg | 3504_5563_5441   | 5563  | 5441  | - | hypothetical protein                                                       |                        |
| 1731 | 3504 | <a href="#">NEOS13_1703</a>   | peg | 3504_6191_5679   | 6191  | 5679  | - | hypothetical protein                                                       |                        |
| 1732 | 3504 | <a href="#">NEOS13_1704</a>   | peg | 3504_6264_7313   | 6264  | 7313  | + | A/G-specific adenine glycosylase (EC 3.2.2.-)                              |                        |
| 1733 | 3504 | <a href="#">NEOS13_1705</a>   | peg | 3504_7543_9459   | 7543  | 9459  | + | Leucine-rich repeat containing protein                                     | Leucine-rich repeat    |
| 1734 | 3504 | <a href="#">NEOS13_1706</a>   | peg | 3504_9469_9588   | 9469  | 9588  | + | Leucine-rich repeat containing protein                                     | Leucine-rich repeat    |
| 1735 | 3506 | <a href="#">NEOS13_1707</a>   | peg | 3506_56_202      | 56    | 202   | + | hypothetical protein                                                       |                        |
| 1736 | 3506 | <a href="#">NEOS13_1708</a>   | peg | 3506_962_825     | 962   | 825   | - | hypothetical protein                                                       |                        |
| 1737 | 3507 | <a href="#">NEOS13_1709</a>   | peg | 3507_736_452     | 736   | 452   | - | hypothetical protein                                                       |                        |
| 1738 | 3509 | <a href="#">NEOS13_1710</a>   | peg | 3509_427_287     | 427   | 287   | - | hypothetical protein                                                       |                        |
| 1739 | 3509 | <a href="#">NEOS13_1711</a>   | peg | 3509_570_1358    | 570   | 1358  | + | hypothetical protein                                                       |                        |
| 1740 | 3510 | <a href="#">NEOS13_1712</a>   | peg | 3510_84_617      | 84    | 617   | + | hypothetical protein                                                       |                        |
| 1741 | 3510 | <a href="#">NEOS13_1713</a>   | peg | 3510_658_1740    | 658   | 1740  | + | hypothetical protein                                                       |                        |
| 1742 | 3510 | <a href="#">NEOS13_1714</a>   | peg | 3510_2026_2370   | 2026  | 2370  | + | Mobile element protein                                                     |                        |
| 1743 | 3511 | <a href="#">NEOS13_1715</a>   | peg | 3511_45_1028     | 45    | 1028  | + | Retron-type RNA-directed DNA polymerase (EC 2.7.7.49)                      |                        |
| 1744 | 3511 | <a href="#">NEOS13_1716</a>   | peg | 3511_1150_2442   | 1150  | 2442  | + | hypothetical protein                                                       |                        |
| 1745 | 3511 | <a href="#">NEOS13_1717</a>   | peg | 3511_2698_2853   | 2698  | 2853  | + | hypothetical protein                                                       |                        |
| 1746 | 3511 | <a href="#">NEOS13_1718</a>   | peg | 3511_2864_3061   | 2864  | 3061  | + | Mobile element protein                                                     |                        |
| 1747 | 3511 | <a href="#">NEOS13_1719</a>   | peg | 3511_3058_3174   | 3058  | 3174  | + | hypothetical protein                                                       |                        |
| 1748 | 3511 | <a href="#">NEOS13_1720</a>   | peg | 3511_3181_3423   | 3181  | 3423  | + | Mobile element protein                                                     |                        |
| 1749 | 3512 | <a href="#">NEOS13_1721</a>   | peg | 3512_45_1028     | 45    | 1028  | + | Retron-type RNA-directed DNA polymerase (EC 2.7.7.49)                      |                        |
| 1750 | 3512 | <a href="#">NEOS13_1722</a>   | peg | 3512_3968_1224   | 3968  | 1224  | - | Tetratricopeptide TPR_2 repeat protein                                     |                        |
| 1751 | 3512 | <a href="#">NEOS13_1723</a>   | peg | 3512_4562_8761   | 4562  | 8761  | + | hypothetical protein                                                       |                        |
| 1752 | 3512 | <a href="#">NEOS13_1724</a>   | peg | 3512_8779_8928   | 8779  | 8928  | + | hypothetical protein                                                       |                        |
| 1753 | 3512 | <a href="#">NEOS13_1725</a>   | peg | 3512_8930_9076   | 8930  | 9076  | + | hypothetical protein                                                       |                        |
| 1754 | 3512 | <a href="#">NEOS13_1726</a>   | peg | 3512_9395_9135   | 9395  | 9135  | - | hypothetical protein                                                       |                        |
| 1755 | 3512 | <a href="#">NEOS13_1727</a>   | peg | 3512_9748_9446   | 9748  | 9446  | - | reverse transcriptase/retron type, probably fragment                       |                        |

|      |      |                               |     |                  |       |       |   |                                                                                |                           |
|------|------|-------------------------------|-----|------------------|-------|-------|---|--------------------------------------------------------------------------------|---------------------------|
| 1756 | 3513 | <a href="#">NEOS13_1728</a>   | peg | 3513_45_1028     | 45    | 1028  | + | Retron-type RNA-directed DNA polymerase (EC 2.7.7.49)                          |                           |
| 1757 | 3513 | <a href="#">NEOS13_1729</a>   | peg | 3513_1348_5238   | 1348  | 5238  | + | hypothetical protein                                                           |                           |
| 1758 | 3514 | <a href="#">NEOS13_1730</a>   | peg | 3514_45_1028     | 45    | 1028  | + | Retron-type RNA-directed DNA polymerase (EC 2.7.7.49)                          |                           |
| 1759 | 3514 | <a href="#">NEOS13_1731</a>   | peg | 3514_1181_1294   | 1181  | 1294  | + | hypothetical protein                                                           |                           |
| 1760 | 3514 | <a href="#">NEOS13_1732</a>   | peg | 3514_1763_1647   | 1763  | 1647  | - | hypothetical protein                                                           |                           |
| 1761 | 3514 | <a href="#">NEOS13_1733</a>   | peg | 3514_1938_2366   | 1938  | 2366  | + | hypothetical protein                                                           |                           |
| 1762 | 3514 | <a href="#">NEOS13_1734</a>   | peg | 3514_2638_2486   | 2638  | 2486  | - | hypothetical protein                                                           |                           |
| 1763 | 3514 | <a href="#">NEOS13_1735</a>   | peg | 3514_3264_4058   | 3264  | 4058  | + | hypothetical protein                                                           |                           |
| 1764 | 3514 | <a href="#">NEOS13_1736</a>   | peg | 3514_4549_4409   | 4549  | 4409  | - | hypothetical protein                                                           |                           |
| 1765 | 3514 | <a href="#">NEOS13_1737</a>   | peg | 3514_5116_4550   | 5116  | 4550  | - | hypothetical protein                                                           |                           |
| 1766 | 3514 | <a href="#">NEOS13_1738</a>   | peg | 3514_5961_5650   | 5961  | 5650  | - | hypothetical protein                                                           |                           |
| 1767 | 3514 | <a href="#">NEOS13_1739</a>   | peg | 3514_7216_6602   | 7216  | 6602  | - | Alkaline phosphatase like protein                                              |                           |
| 1768 | 3515 | <a href="#">NEOS13_1740</a>   | peg | 3515_45_1028     | 45    | 1028  | + | Retron-type RNA-directed DNA polymerase (EC 2.7.7.49)                          |                           |
| 1769 | 3515 | <a href="#">NEOS13_1741</a>   | peg | 3515_4116_1255   | 4116  | 1255  | - | Valyl-tRNA synthetase (EC 6.1.1.9)                                             |                           |
| 1770 | 3515 | <a href="#">NEOS13_1742</a>   | peg | 3515_7747_4670   | 7747  | 4670  | - | hypothetical protein                                                           |                           |
| 1771 | 3515 | <a href="#">NEOS13_1743</a>   | peg | 3515_7967_8089   | 7967  | 8089  | + | hypothetical protein                                                           |                           |
| 1772 | 3515 | <a href="#">NEOS13_1744</a>   | peg | 3515_8357_8512   | 8357  | 8512  | + | hypothetical protein                                                           |                           |
| 1773 | 3515 | <a href="#">NEOS13_1745</a>   | peg | 3515_9230_8742   | 9230  | 8742  | - | protein of unknown function DUF192                                             |                           |
| 1774 | 3515 | <a href="#">NEOS13_1746</a>   | peg | 3515_15057_9361  | 15057 | 9361  | - | Excinuclease ABC subunit A, dimeric form                                       | ABC_transporter           |
| 1775 | 3515 | <a href="#">NEOS13_1747</a>   | peg | 3515_15584_15453 | 15584 | 15453 | - | hypothetical protein                                                           |                           |
| 1776 | 3515 | <a href="#">NEOS13_1748</a>   | peg | 3515_15747_17516 | 15747 | 17516 | + | Pyruvate kinase (EC 2.7.1.40)                                                  | Glycolysis_Gluconogenesis |
| 1777 | 3515 | <a href="#">NEOS13_1749</a>   | peg | 3515_20468_17883 | 20468 | 17883 | - | DNA topoisomerase I (EC 5.99.1.2)                                              |                           |
| 1778 | 3515 | <a href="#">NEOS13_1750</a>   | peg | 3515_20811_20954 | 20811 | 20954 | + | hypothetical protein                                                           |                           |
| 1779 | 3515 | <a href="#">NEOS13_1751</a>   | peg | 3515_22059_20956 | 22059 | 20956 | - | 3-dehydroquinate synthase (EC 4.2.3.4)                                         |                           |
| 1780 | 3515 | <a href="#">NEOS13_1752</a>   | peg | 3515_23971_23156 | 23971 | 23156 | - | hypothetical protein                                                           |                           |
| 1781 | 3515 | <a href="#">NEOS13_1753</a>   | peg | 3515_24061_24882 | 24061 | 24882 | + | Chromosome (plasmid) partitioning protein ParB / Stage 0 sporulation protein J |                           |
| 1782 | 3515 | <a href="#">NEOS13_1754</a>   | peg | 3515_25392_25526 | 25392 | 25526 | + | hypothetical protein                                                           |                           |
| 1783 | 3515 | <a href="#">NEOS13_1755</a>   | peg | 3515_26253_27362 | 26253 | 27362 | + | hypothetical protein                                                           |                           |
| 1784 | 3515 | <a href="#">NEOS13_1756</a>   | peg | 3515_27561_27394 | 27561 | 27394 | - | hypothetical protein                                                           |                           |
| 1785 | 3515 | <a href="#">NEOS13_1757</a>   | peg | 3515_27843_28976 | 27843 | 28976 | + | BatA (Bacteroides aerotolerance operon)                                        |                           |
| 1786 | 3515 | <a href="#">NEOS13_1758</a>   | peg | 3515_28973_31864 | 28973 | 31864 | + | hypothetical protein                                                           |                           |
| 1787 | 3515 | <a href="#">NEOS13_1759</a>   | peg | 3515_31858_33606 | 31858 | 33606 | + | hypothetical protein                                                           |                           |
| 1788 | 3515 | <a href="#">NEOS13_1760</a>   | peg | 3515_33599_34417 | 33599 | 34417 | + | putative batE protein                                                          |                           |
| 1789 | 3515 | <a href="#">NEOS13_1761</a>   | peg | 3515_34665_34552 | 34665 | 34552 | - | hypothetical protein                                                           |                           |
| 1790 | 3515 | <a href="#">NEOS13_1762</a>   | peg | 3515_34982_35962 | 34982 | 35962 | + | hypothetical protein                                                           |                           |
| 1791 | 3515 | <a href="#">NEOS13_1763</a>   | peg | 3515_36199_36059 | 36199 | 36059 | - | hypothetical protein                                                           |                           |
| 1792 | 3515 | <a href="#">NEOS13_1764</a>   | peg | 3515_36271_38283 | 36271 | 38283 | + | Ribonucleotide reductase of class II (coenzyme B12-dependent) (EC 1.17.4.1)    |                           |
| 1793 | 3515 | <a href="#">NEOS13_1765</a>   | peg | 3515_39710_39045 | 39710 | 39045 | - | hypothetical protein                                                           |                           |
| 1794 | 3515 | <a href="#">NEOS13_1766</a>   | peg | 3515_41117_39732 | 41117 | 39732 | - | hypothetical protein                                                           |                           |
| 1795 | 3515 | <a href="#">NEOS13_1767</a>   | peg | 3515_41462_41632 | 41462 | 41632 | + | hypothetical protein                                                           |                           |
| 1796 | 3516 | <a href="#">NEOS13_1768</a>   | peg | 3516_45_1028     | 45    | 1028  | + | Retron-type RNA-directed DNA polymerase (EC 2.7.7.49)                          |                           |
| 1797 | 3516 | <a href="#">NEOS13_1769</a>   | peg | 3516_1956_4037   | 1956  | 4037  | + | Leucine-rich repeat containing protein                                         | Leucine-rich repeat       |
| 1798 | 3516 | <a href="#">NEOS13_1770</a>   | peg | 3516_4079_4237   | 4079  | 4237  | + | hypothetical protein                                                           |                           |
| 1799 | 3516 | <a href="#">NEOS13_1771</a>   | peg | 3516_7211_4530   | 7211  | 4530  | - | Mg(2+) transport ATPase, P-type (EC 3.6.3.2)                                   |                           |
| 1800 | 3516 | <a href="#">NEOS13_1772</a>   | peg | 3516_9977_7455   | 9977  | 7455  | - | hypothetical protein                                                           |                           |
| 1801 | 3516 | <a href="#">NEOS13_1773</a>   | peg | 3516_11391_11224 | 11391 | 11224 | - | hypothetical protein                                                           |                           |
| 1802 | 3516 | <a href="#">NEOS13_1774</a>   | peg | 3516_11345_14116 | 11345 | 14116 | + | Chaperone protein DnaK                                                         |                           |
| 1803 | 3516 | <a href="#">NEOS13_1775</a>   | peg | 3516_16144_14276 | 16144 | 14276 | - | putative sulfate transport protein                                             |                           |
| 1804 | 3516 | <a href="#">NEOS13_1776</a>   | peg | 3516_16260_17687 | 16260 | 17687 | + | GTP-binding protein EngA                                                       |                           |
| 1805 | 3516 | <a href="#">NEOS13_1777</a>   | peg | 3516_17920_18759 | 17920 | 18759 | + | Ribosomal protein L11 methyltransferase (EC 2.1.1.-)                           |                           |
| 1806 | 3516 | <a href="#">NEOS13_1778</a>   | peg | 3516_19433_19179 | 19433 | 19179 | - | hypothetical protein                                                           |                           |
| 1807 | 3516 | <a href="#">NEOS13_1779</a>   | peg | 3516_21175_19508 | 21175 | 19508 | - | Heat shock protein 60 family chaperone GroEL                                   |                           |
| 1808 | 3516 | <a href="#">NEOS13_1780</a>   | peg | 3516_21505_21212 | 21505 | 21212 | - | Heat shock protein 60 family co-chaperone GroES                                |                           |
| 1809 | 3516 | <a href="#">NEOS13_1781</a>   | peg | 3516_22877_21618 | 22877 | 21618 | - | alternate gene name: yzbB                                                      |                           |
| 1810 | 3516 | <a href="#">NEOS13_1782</a>   | peg | 3516_23479_24912 | 23479 | 24912 | + | hypothetical protein                                                           |                           |
| 1811 | 3516 | <a href="#">NEOS13_1783</a>   | peg | 3516_25429_25202 | 25429 | 25202 | - | Mobile element protein                                                         |                           |
| 1812 | 3516 | <a href="#">NEOS13_1784</a>   | peg | 3516_25904_25698 | 25904 | 25698 | - | Mobile element protein                                                         |                           |
| 1813 | 3516 | <a href="#">NEOS13_1785</a>   | peg | 3516_26327_26202 | 26327 | 26202 | - | hypothetical protein                                                           |                           |
| 1814 | 3516 | <a href="#">NEOS13_1786</a>   | peg | 3516_27972_26779 | 27972 | 26779 | - | Leucine-rich repeat containing protein                                         | Leucine-rich repeat       |
| 1815 | 3517 | <a href="#">NEOS13_1787</a>   | peg | 3517_45_1028     | 45    | 1028  | + | Retron-type RNA-directed DNA polymerase (EC 2.7.7.49)                          |                           |
| 1816 | 3517 | <a href="#">NEOS13_1788</a>   | peg | 3517_2126_1332   | 2126  | 1332  | - | 5-nucleotidase SurE (EC 3.1.3.5)                                               |                           |
| 1817 | 3517 | <a href="#">NEOS13_1789</a>   | peg | 3517_2277_3299   | 2277  | 3299  | + | hypothetical protein                                                           |                           |
| 1818 | 3517 | <a href="#">NEOS13_1790</a>   | peg | 3517_5221_3368   | 5221  | 3368  | - | hypothetical protein                                                           |                           |
| 1819 | 3517 | <a href="#">NEOS13_1791</a>   | peg | 3517_6081_5227   | 6081  | 5227  | - | hypothetical protein                                                           |                           |
| 1820 | 3517 | <a href="#">NEOS13_1792</a>   | peg | 3517_7071_6325   | 7071  | 6325  | - | tRNA(Cytosine32)-2-thiocytidine synthetase                                     |                           |
| 1821 | 3517 | <a href="#">NEOS13_1793</a>   | peg | 3517_7191_7445   | 7191  | 7445  | + | hypothetical protein                                                           |                           |
| 1822 | 3517 | <a href="#">NEOS13_0029ma</a> | rna | 3517_7675_7747   | 7675  | 7747  | + | tRNA-Thr-TGT                                                                   | RNA                       |
| 1823 | 3517 | <a href="#">NEOS13_0030ma</a> | rna | 3517_7755_7836   | 7755  | 7836  | + | tRNA-Tyr-GTA                                                                   | RNA                       |
| 1824 | 3517 | <a href="#">NEOS13_1794</a>   | peg | 3517_8922_8032   | 8922  | 8032  | - | Cassette chromosome recombinase B                                              |                           |
| 1825 | 3517 | <a href="#">NEOS13_1795</a>   | peg | 3517_9519_9220   | 9519  | 9220  | - | hypothetical protein                                                           |                           |

|      |      |                                |     |                  |       |       |   |                                                                                                                   |                           |
|------|------|--------------------------------|-----|------------------|-------|-------|---|-------------------------------------------------------------------------------------------------------------------|---------------------------|
| 1826 | 3517 | <a href="#">NEOS13_1796</a>    | peg | 3517_9824_9651   | 9824  | 9651  | - | hypothetical protein                                                                                              |                           |
| 1827 | 3517 | <a href="#">NEOS13_1797</a>    | peg | 3517_11935_10715 | 11935 | 10715 | - | putative Na(+)/H(+) antiporter                                                                                    |                           |
| 1828 | 3517 | <a href="#">NEOS13_1798</a>    | peg | 3517_12692_12808 | 12692 | 12808 | + | hypothetical protein                                                                                              |                           |
| 1829 | 3517 | <a href="#">NEOS13_1799</a>    | peg | 3517_12820_12939 | 12820 | 12939 | + | hypothetical protein                                                                                              |                           |
| 1830 | 3517 | <a href="#">NEOS13_1800</a>    | peg | 3517_13164_13592 | 13164 | 13592 | + | heat shock protein Hsp20                                                                                          |                           |
| 1831 | 3517 | <a href="#">NEOS13_1801</a>    | peg | 3517_14266_13928 | 14266 | 13928 | - | hypothetical protein                                                                                              |                           |
| 1832 | 3517 | <a href="#">NEOS13_1802</a>    | peg | 3517_14781_14656 | 14781 | 14656 | - | hypothetical protein                                                                                              |                           |
| 1833 | 3517 | <a href="#">NEOS13_1803</a>    | peg | 3517_14827_16203 | 14827 | 16203 | + | Mg/Co/Ni transporter MgtE / CBS domain                                                                            |                           |
| 1834 | 3517 | <a href="#">NEOS13_1804</a>    | peg | 3517_16791_17183 | 16791 | 17183 | + | putative hyperosmotically inducible periplasmic protein                                                           |                           |
| 1835 | 3517 | <a href="#">NEOS13_1805</a>    | peg | 3517_17199_17786 | 17199 | 17786 | + | hypothetical protein                                                                                              |                           |
| 1836 | 3517 | <a href="#">NEOS13_1806</a>    | peg | 3517_18207_19196 | 18207 | 19196 | + | hypothetical protein                                                                                              |                           |
| 1837 | 3517 | <a href="#">NEOS13_1807</a>    | peg | 3517_19753_19337 | 19753 | 19337 | - | hypothetical protein                                                                                              |                           |
| 1838 | 3517 | <a href="#">NEOS13_1808</a>    | peg | 3517_20169_19750 | 20169 | 19750 | - | hypothetical protein                                                                                              |                           |
| 1839 | 3517 | <a href="#">NEOS13_1809</a>    | peg | 3517_20712_20599 | 20712 | 20599 | - | hypothetical protein                                                                                              |                           |
| 1840 | 3517 | <a href="#">NEOS13_1810</a>    | peg | 3517_21389_20709 | 21389 | 20709 | - | Probable O-methyltransferase                                                                                      |                           |
| 1841 | 3517 | <a href="#">NEOS13_1811</a>    | peg | 3517_21494_21853 | 21494 | 21853 | + | putative arsenate reductase( EC:1.- )                                                                             |                           |
| 1842 | 3517 | <a href="#">NEOS13_1812</a>    | peg | 3517_22197_22979 | 22197 | 22979 | + | hypothetical protein                                                                                              |                           |
| 1843 | 3517 | <a href="#">NEOS13_1813</a>    | peg | 3517_23251_23394 | 23251 | 23394 | + | hypothetical protein                                                                                              |                           |
| 1844 | 3517 | <a href="#">NEOS13_1814</a>    | peg | 3517_24256_24122 | 24256 | 24122 | - | hypothetical protein                                                                                              |                           |
| 1845 | 3517 | <a href="#">NEOS13_1815</a>    | peg | 3517_24629_25138 | 24629 | 25138 | + | hypothetical protein                                                                                              |                           |
| 1846 | 3517 | <a href="#">NEOS13_1816</a>    | peg | 3517_26235_25237 | 26235 | 25237 | - | hypothetical protein                                                                                              |                           |
| 1847 | 3518 | <a href="#">NEOS13_1817</a>    | peg | 3518_45_1028     | 45    | 1028  | + | Retron-type RNA-directed DNA polymerase (EC 2.7.7.49)                                                             |                           |
| 1848 | 3518 | <a href="#">NEOS13_1818</a>    | peg | 3518_1121_1282   | 1121  | 1282  | + | hypothetical protein                                                                                              |                           |
| 1849 | 3518 | <a href="#">NEOS13_1819</a>    | peg | 3518_1385_2095   | 1385  | 2095  | + | hypothetical protein                                                                                              |                           |
| 1850 | 3518 | <a href="#">NEOS13_1820</a>    | peg | 3518_2844_2635   | 2844  | 2635  | - | hypothetical protein                                                                                              |                           |
| 1851 | 3518 | <a href="#">NEOS13_1821</a>    | peg | 3518_2945_3244   | 2945  | 3244  | + | HigA protein (antitoxin to HigB)                                                                                  |                           |
| 1852 | 3518 | <a href="#">NEOS13_1822</a>    | peg | 3518_3680_3871   | 3680  | 3871  | + | hypothetical protein                                                                                              |                           |
| 1853 | 3519 | <a href="#">NEOS13_1823</a>    | peg | 3519_1026_2102   | 1026  | 2102  | + | Branched-chain alpha-keto acid dehydrogenase, E1 component, alpha subunit (EC 1.2.4.4)                            |                           |
| 1854 | 3519 | <a href="#">NEOS13_1824</a>    | peg | 3519_2132_3109   | 2132  | 3109  | + | Branched-chain alpha-keto acid dehydrogenase, E1 component, beta subunit (EC 1.2.4.4)                             | Glycolysis_Glucogenesis   |
| 1855 | 3519 | <a href="#">NEOS13_1825</a>    | peg | 3519_3122_4348   | 3122  | 4348  | + | Dihydrolipoamide acyltransferase component of branched-chain alpha-keto acid dehydrogenase complex (EC 2.3.1.168) | Glycolysis_Glucogenesis   |
| 1856 | 3519 | <a href="#">NEOS13_1826</a>    | peg | 3519_4311_4448   | 4311  | 4448  | + | hypothetical protein                                                                                              |                           |
| 1857 | 3519 | <a href="#">NEOS13_1827</a>    | peg | 3519_4602_6293   | 4602  | 6293  | + | Potassium-transporting ATPase A chain (EC 3.6.3.12) (TC 3.A.3.7.1)                                                |                           |
| 1858 | 3519 | <a href="#">NEOS13_1828</a>    | peg | 3519_6364_8460   | 6364  | 8460  | + | Potassium-transporting ATPase B chain (EC 3.6.3.12) (TC 3.A.3.7.1)                                                |                           |
| 1859 | 3519 | <a href="#">NEOS13_1829</a>    | peg | 3519_8498_9058   | 8498  | 9058  | + | Potassium-transporting ATPase C chain (EC 3.6.3.12) (TC 3.A.3.7.1)                                                |                           |
| 1860 | 3519 | <a href="#">NEOS13_1830</a>    | peg | 3519_10665_12377 | 10665 | 12377 | + | hypothetical protein                                                                                              |                           |
| 1861 | 3519 | <a href="#">NEOS13_1831</a>    | peg | 3519_12843_14420 | 12843 | 14420 | + | Leucine-rich repeat containing protein                                                                            | Leucine-rich repeat       |
| 1862 | 3519 | <a href="#">NEOS13_1832</a>    | peg | 3519_15173_15048 | 15173 | 15048 | - | hypothetical protein                                                                                              |                           |
| 1863 | 3519 | <a href="#">NEOS13_1833</a>    | peg | 3519_15490_15371 | 15490 | 15371 | - | hypothetical protein                                                                                              |                           |
| 1864 | 3519 | <a href="#">NEOS13_1834</a>    | peg | 3519_15902_15678 | 15902 | 15678 | - | hypothetical protein                                                                                              |                           |
| 1865 | 3519 | <a href="#">NEOS13_1835</a>    | peg | 3519_16222_17631 | 16222 | 17631 | + | hypothetical protein                                                                                              |                           |
| 1866 | 3519 | <a href="#">NEOS13_1836</a>    | peg | 3519_19189_17903 | 19189 | 17903 | - | RNA methyltransferase, TrmA family                                                                                |                           |
| 1867 | 3519 | <a href="#">NEOS13_1837</a>    | peg | 3519_20939_19182 | 20939 | 19182 | - | Single-stranded-DNA-specific exonuclease RecJ (EC 3.1.-.-)                                                        |                           |
| 1868 | 3519 | <a href="#">NEOS13_1838</a>    | peg | 3519_26072_21498 | 26072 | 21498 | - | Protein-export membrane protein SecD (TC 3.A.5.1.1) / Protein-export membrane protein SecF (TC 3.A.5.1.1)         |                           |
| 1869 | 3519 | <a href="#">NEOS13_1839</a>    | peg | 3519_28005_26452 | 28005 | 26452 | - | ADP/ATP Translocase, NTT1                                                                                         | NTT                       |
| 1870 | 3519 | <a href="#">NEOS13_1840</a>    | peg | 3519_29197_28682 | 29197 | 28682 | - | FIG00493911: hypothetical protein                                                                                 |                           |
| 1871 | 3519 | <a href="#">NEOS13_1841</a>    | peg | 3519_29550_30665 | 29550 | 30665 | + | hypothetical protein                                                                                              |                           |
| 1872 | 3519 | <a href="#">NEOS13_1842</a>    | peg | 3519_30662_31654 | 30662 | 31654 | + | Manganese ABC transporter, periplasmic-binding protein SitA                                                       | ABC_transporter           |
| 1873 | 3519 | <a href="#">NEOS13_1843</a>    | peg | 3519_31651_32439 | 31651 | 32439 | + | Manganese ABC transporter, ATP-binding protein SitB                                                               | ABC_transporter           |
| 1874 | 3519 | <a href="#">NEOS13_1844</a>    | peg | 3519_32444_33796 | 32444 | 33796 | + | Manganese ABC transporter, inner membrane permease protein SitC                                                   | ABC_transporter           |
| 1875 | 3519 | <a href="#">NEOS13_1845</a>    | peg | 3519_33793_34803 | 33793 | 34803 | + | Manganese ABC transporter, inner membrane permease protein SitD                                                   | ABC_transporter           |
| 1876 | 3519 | <a href="#">NEOS13_1846</a>    | peg | 3519_35587_34817 | 35587 | 34817 | - | hypothetical protein                                                                                              |                           |
| 1877 | 3519 | <a href="#">NEOS13_1847</a>    | peg | 3519_36258_36139 | 36258 | 36139 | - | hypothetical protein                                                                                              |                           |
| 1878 | 3520 | <a href="#">NEOS13_0031m a</a> | rna | 3520_311_3338    | 311   | 3338  | + | Large Subunit Ribosomal RNA; lsuRNA; LSU rRNA                                                                     | RNA                       |
| 1879 | 3520 | <a href="#">NEOS13_1848</a>    | peg | 3520_3643_3765   | 3643  | 3765  | + | hypothetical protein                                                                                              |                           |
| 1880 | 3520 | <a href="#">NEOS13_1849</a>    | peg | 3520_5773_3740   | 5773  | 3740  | - | hypothetical protein                                                                                              |                           |
| 1881 | 3520 | <a href="#">NEOS13_1850</a>    | peg | 3520_6047_7234   | 6047  | 7234  | + | hypothetical protein                                                                                              |                           |
| 1882 | 3520 | <a href="#">NEOS13_1851</a>    | peg | 3520_7954_7256   | 7954  | 7256  | - | Ribosomal RNA small subunit methyltransferase E (EC 2.1.1.-)                                                      |                           |
| 1883 | 3520 | <a href="#">NEOS13_1852</a>    | peg | 3520_9060_7957   | 9060  | 7957  | - | FIG00493852: hypothetical protein                                                                                 |                           |
| 1884 | 3520 | <a href="#">NEOS13_1853</a>    | peg | 3520_9902_9195   | 9902  | 9195  | - | Hypothetical protein YbbP, contains nucleotide-binding domain of DisA bacterial checkpoint controller             |                           |
| 1885 | 3520 | <a href="#">NEOS13_1854</a>    | peg | 3520_10783_10007 | 10783 | 10007 | - | Dihydropteroate synthase (EC 2.5.1.15)                                                                            |                           |
| 1886 | 3520 | <a href="#">NEOS13_1855</a>    | peg | 3520_10913_12316 | 10913 | 12316 | + | Cytochrome d ubiquinol oxidase subunit I (EC 1.10.3.-)                                                            | Oxidative_Phosphorylation |
| 1887 | 3520 | <a href="#">NEOS13_1856</a>    | peg | 3520_12313_13344 | 12313 | 13344 | + | Cytochrome d ubiquinol oxidase subunit II (EC 1.10.3.-)                                                           | Oxidative_Phosphorylation |

|      |      |                               |     |                  |       |       |   |                                                                                  |                           |
|------|------|-------------------------------|-----|------------------|-------|-------|---|----------------------------------------------------------------------------------|---------------------------|
| 1888 | 3520 | <a href="#">NEOS13_1857</a>   | peg | 3520_14584_13358 | 14584 | 13358 | - | Dihydrofolate synthase (EC 6.3.2.12) / Folylpolyglutamate synthase (EC 6.3.2.17) |                           |
| 1889 | 3520 | <a href="#">NEOS13_1858</a>   | peg | 3520_15438_14584 | 15438 | 14584 | - | COG0613, Predicted metal-dependent phosphoesterases (PHP family)                 |                           |
| 1890 | 3520 | <a href="#">NEOS13_1859</a>   | peg | 3520_16325_15435 | 16325 | 15435 | - | UDP-N-acetylenolpyruvoylglucosamine reductase (EC 1.1.1.158)                     |                           |
| 1891 | 3520 | <a href="#">NEOS13_1860</a>   | peg | 3520_16842_16330 | 16842 | 16330 | - | Transcription termination protein NusB                                           |                           |
| 1892 | 3520 | <a href="#">NEOS13_0032ma</a> | rna | 3520_17271_17344 | 17271 | 17344 | + | tRNA-Met-CAT                                                                     | RNA                       |
| 1893 | 3520 | <a href="#">NEOS13_1861</a>   | peg | 3520_17611_17471 | 17611 | 17471 | - | hypothetical protein                                                             |                           |
| 1894 | 3520 | <a href="#">NEOS13_1862</a>   | peg | 3520_17929_17621 | 17929 | 17621 | - | hypothetical protein                                                             |                           |
| 1895 | 3520 | <a href="#">NEOS13_1863</a>   | peg | 3520_18302_17913 | 18302 | 17913 | - | hypothetical protein                                                             |                           |
| 1896 | 3520 | <a href="#">NEOS13_1864</a>   | peg | 3520_18822_19094 | 18822 | 19094 | + | hypothetical protein                                                             |                           |
| 1897 | 3520 | <a href="#">NEOS13_1865</a>   | peg | 3520_19396_19548 | 19396 | 19548 | + | hypothetical protein                                                             |                           |
| 1898 | 3520 | <a href="#">NEOS13_1866</a>   | peg | 3520_20728_19787 | 20728 | 19787 | - | putative MutE/nudix family protein                                               |                           |
| 1899 | 3520 | <a href="#">NEOS13_1867</a>   | peg | 3520_21027_20749 | 21027 | 20749 | - | hypothetical protein                                                             |                           |
| 1900 | 3520 | <a href="#">NEOS13_1868</a>   | peg | 3520_21682_21158 | 21682 | 21158 | - | conserved protein                                                                |                           |
| 1901 | 3520 | <a href="#">NEOS13_1869</a>   | peg | 3520_21876_22103 | 21876 | 22103 | + | hypothetical protein                                                             |                           |
| 1902 | 3520 | <a href="#">NEOS13_1870</a>   | peg | 3520_23204_22959 | 23204 | 22959 | - | hypothetical protein                                                             |                           |
| 1903 | 3520 | <a href="#">NEOS13_1871</a>   | peg | 3520_23658_23885 | 23658 | 23885 | + | hypothetical protein                                                             |                           |
| 1904 | 3520 | <a href="#">NEOS13_1872</a>   | peg | 3520_24862_24722 | 24862 | 24722 | - | hypothetical protein                                                             |                           |
| 1905 | 3520 | <a href="#">NEOS13_1873</a>   | peg | 3520_25130_25270 | 25130 | 25270 | + | hypothetical protein                                                             |                           |
| 1906 | 3520 | <a href="#">NEOS13_1874</a>   | peg | 3520_25837_27114 | 25837 | 27114 | + | hypothetical protein                                                             |                           |
| 1907 | 3520 | <a href="#">NEOS13_1875</a>   | peg | 3520_27675_29894 | 27675 | 29894 | + | hypothetical protein                                                             |                           |
| 1908 | 3520 | <a href="#">NEOS13_1876</a>   | peg | 3520_30506_30682 | 30506 | 30682 | + | hypothetical protein                                                             |                           |
| 1909 | 3520 | <a href="#">NEOS13_1877</a>   | peg | 3520_31000_30734 | 31000 | 30734 | - | hypothetical protein                                                             |                           |
| 1910 | 3520 | <a href="#">NEOS13_1878</a>   | peg | 3520_31234_31001 | 31234 | 31001 | - | hypothetical protein                                                             |                           |
| 1911 | 3520 | <a href="#">NEOS13_1879</a>   | peg | 3520_31468_31710 | 31468 | 31710 | + | hypothetical protein                                                             |                           |
| 1912 | 3520 | <a href="#">NEOS13_1880</a>   | peg | 3520_32214_32005 | 32214 | 32005 | - | hypothetical protein                                                             |                           |
| 1913 | 3520 | <a href="#">NEOS13_1881</a>   | peg | 3520_32362_34233 | 32362 | 34233 | + | hypothetical protein                                                             |                           |
| 1914 | 3520 | <a href="#">NEOS13_1882</a>   | peg | 3520_35439_34975 | 35439 | 34975 | - | hypothetical protein                                                             |                           |
| 1915 | 3520 | <a href="#">NEOS13_1883</a>   | peg | 3520_35605_35459 | 35605 | 35459 | - | hypothetical protein                                                             |                           |
| 1916 | 3520 | <a href="#">NEOS13_1884</a>   | peg | 3520_36071_36190 | 36071 | 36190 | + | hypothetical protein                                                             |                           |
| 1917 | 3520 | <a href="#">NEOS13_1885</a>   | peg | 3520_36408_36527 | 36408 | 36527 | + | hypothetical protein                                                             |                           |
| 1918 | 3520 | <a href="#">NEOS13_1886</a>   | peg | 3520_37055_37237 | 37055 | 37237 | + | hypothetical protein                                                             |                           |
| 1919 | 3520 | <a href="#">NEOS13_1887</a>   | peg | 3520_38807_37314 | 38807 | 37314 | - | hypothetical protein                                                             |                           |
| 1920 | 3520 | <a href="#">NEOS13_1888</a>   | peg | 3520_39058_39648 | 39058 | 39648 | + | GCN5-related N-acetyltransferase                                                 |                           |
| 1921 | 3520 | <a href="#">NEOS13_1889</a>   | peg | 3520_39938_40114 | 39938 | 40114 | + | hypothetical protein                                                             |                           |
| 1922 | 3520 | <a href="#">NEOS13_1890</a>   | peg | 3520_40372_40575 | 40372 | 40575 | + | DUF378 domain-containing protein                                                 |                           |
| 1923 | 3520 | <a href="#">NEOS13_1891</a>   | peg | 3520_41520_41071 | 41520 | 41071 | - | Membrane-associated phospholipid phosphatase                                     |                           |
| 1924 | 3520 | <a href="#">NEOS13_1892</a>   | peg | 3520_42319_41834 | 42319 | 41834 | - | hypothetical protein                                                             |                           |
| 1925 | 3520 | <a href="#">NEOS13_1893</a>   | peg | 3520_42593_42730 | 42593 | 42730 | + | hypothetical protein                                                             |                           |
| 1926 | 3520 | <a href="#">NEOS13_1894</a>   | peg | 3520_42845_43288 | 42845 | 43288 | + | hypothetical protein                                                             |                           |
| 1927 | 3520 | <a href="#">NEOS13_1895</a>   | peg | 3520_43390_45432 | 43390 | 45432 | + | Thymidylate kinase (EC 2.7.4.9)                                                  |                           |
| 1928 | 3521 | <a href="#">NEOS13_1896</a>   | peg | 3521_879_995     | 879   | 995   | + | hypothetical protein                                                             |                           |
| 1929 | 3521 | <a href="#">NEOS13_1897</a>   | peg | 3521_1053_1469   | 1053  | 1469  | + | hypothetical protein                                                             |                           |
| 1930 | 3521 | <a href="#">NEOS13_1898</a>   | peg | 3521_1841_2413   | 1841  | 2413  | + | hypothetical protein                                                             |                           |
| 1931 | 3521 | <a href="#">NEOS13_1899</a>   | peg | 3521_2403_2657   | 2403  | 2657  | + | hypothetical protein                                                             |                           |
| 1932 | 3521 | <a href="#">NEOS13_1900</a>   | peg | 3521_2862_3035   | 2862  | 3035  | + | hypothetical protein                                                             |                           |
| 1933 | 3523 | <a href="#">NEOS13_1901</a>   | peg | 3523_1882_605    | 1882  | 605   | - | Leucine-rich repeat containing protein                                           | Leucine-rich repeat       |
| 1934 | 3523 | <a href="#">NEOS13_1902</a>   | peg | 3523_2213_2010   | 2213  | 2010  | - | hypothetical protein                                                             |                           |
| 1935 | 3523 | <a href="#">NEOS13_1903</a>   | peg | 3523_3509_2367   | 3509  | 2367  | - | Leucine-rich repeat containing protein                                           | Leucine-rich repeat       |
| 1936 | 3524 | <a href="#">NEOS13_1904</a>   | peg | 3524_1208_420    | 1208  | 420   | - | hypothetical protein                                                             |                           |
| 1937 | 3524 | <a href="#">NEOS13_1905</a>   | peg | 3524_1351_1491   | 1351  | 1491  | + | hypothetical protein                                                             |                           |
| 1938 | 3524 | <a href="#">NEOS13_1906</a>   | peg | 3524_1826_1584   | 1826  | 1584  | - | hypothetical protein                                                             |                           |
| 1939 | 3525 | <a href="#">NEOS13_1907</a>   | peg | 3525_55_927      | 55    | 927   | + | hypothetical protein                                                             |                           |
| 1940 | 3526 | <a href="#">NEOS13_1908</a>   | peg | 3526_40_168      | 40    | 168   | + | hypothetical protein                                                             |                           |
| 1941 | 3526 | <a href="#">NEOS13_1909</a>   | peg | 3526_283_726     | 283   | 726   | + | transposase, IS4 family protein                                                  | Transposase               |
| 1942 | 3526 | <a href="#">NEOS13_1910</a>   | peg | 3526_1257_5834   | 1257  | 5834  | + | hypothetical protein                                                             |                           |
| 1943 | 3526 | <a href="#">NEOS13_1911</a>   | peg | 3526_5818_5931   | 5818  | 5931  | + | hypothetical protein                                                             |                           |
| 1944 | 3528 | <a href="#">NEOS13_1912</a>   | peg | 3528_393_172     | 393   | 172   | - | Mobile element protein                                                           |                           |
| 1945 | 3529 | <a href="#">NEOS13_1913</a>   | peg | 3529_76_240      | 76    | 240   | + | hypothetical protein                                                             |                           |
| 1946 | 3529 | <a href="#">NEOS13_1914</a>   | peg | 3529_557_1213    | 557   | 1213  | + | Carbonic anhydrase (EC 4.2.1.1)                                                  |                           |
| 1947 | 3529 | <a href="#">NEOS13_1915</a>   | peg | 3529_2932_1601   | 2932  | 1601  | - | Enolase (EC 4.2.1.11)                                                            | Glycolysis_Gluconogenesis |
| 1948 | 3529 | <a href="#">NEOS13_1916</a>   | peg | 3529_4394_3240   | 4394  | 3240  | - | Ribosome small subunit-stimulated GTPase EngC                                    |                           |
| 1949 | 3529 | <a href="#">NEOS13_1917</a>   | peg | 3529_5146_4391   | 5146  | 4391  | - | hypothetical protein                                                             |                           |
| 1950 | 3529 | <a href="#">NEOS13_1918</a>   | peg | 3529_6513_5446   | 6513  | 5446  | - | hypothetical protein                                                             |                           |
| 1951 | 3529 | <a href="#">NEOS13_1919</a>   | peg | 3529_7583_6720   | 7583  | 6720  | - | hypothetical protein                                                             |                           |
| 1952 | 3529 | <a href="#">NEOS13_1920</a>   | peg | 3529_8571_8446   | 8571  | 8446  | - | hypothetical protein                                                             |                           |
| 1953 | 3529 | <a href="#">NEOS13_1921</a>   | peg | 3529_8834_8995   | 8834  | 8995  | + | hypothetical protein                                                             |                           |
| 1954 | 3529 | <a href="#">NEOS13_1922</a>   | peg | 3529_9007_9162   | 9007  | 9162  | + | hypothetical protein                                                             |                           |
| 1955 | 3529 | <a href="#">NEOS13_1923</a>   | peg | 3529_9442_9242   | 9442  | 9242  | - | hypothetical protein                                                             |                           |
| 1956 | 3529 | <a href="#">NEOS13_1924</a>   | peg | 3529_10844_9609  | 10844 | 9609  | - | tRNA nucleotidyltransferase (EC 2.7.7.21) (EC 2.7.7.25)                          |                           |
| 1957 | 3529 | <a href="#">NEOS13_1925</a>   | peg | 3529_10898_12868 | 10898 | 12868 | + | DNA mismatch repair protein MutL                                                 |                           |
| 1958 | 3529 | <a href="#">NEOS13_1926</a>   | peg | 3529_12872_13915 | 12872 | 13915 | + | Aminopeptidase YpdF (MP-, MA-, MS-, AP-, NP- specific)                           |                           |
| 1959 | 3529 | <a href="#">NEOS13_1927</a>   | peg | 3529_15922_13904 | 15922 | 13904 | - | hypothetical protein                                                             |                           |
| 1960 | 3529 | <a href="#">NEOS13_1928</a>   | peg | 3529_16449_18239 | 16449 | 18239 | + | Phosphate regulon sensor protein PhoR (SphS) (EC 2.7.13.3)                       |                           |
| 1961 | 3529 | <a href="#">NEOS13_1929</a>   | peg | 3529_18363_19355 | 18363 | 19355 | + | MoxR-like ATPase in aerotolerance operon                                         |                           |
| 1962 | 3529 | <a href="#">NEOS13_1930</a>   | peg | 3529_19371_20258 | 19371 | 20258 | + | hypothetical protein PA3071                                                      |                           |
| 1963 | 3529 | <a href="#">NEOS13_1931</a>   | peg | 3529_20255_21295 | 20255 | 21295 | + | hypothetical protein                                                             |                           |



|      |      |                                    |     |                  |       |       |   |                                                                                                                                         |                           |
|------|------|------------------------------------|-----|------------------|-------|-------|---|-----------------------------------------------------------------------------------------------------------------------------------------|---------------------------|
| 1964 | 3529 | <a href="#">NEOS13_1932</a>        | peg | 3529_21489_22109 | 21489 | 22109 | + | SSU ribosomal protein S4p (S9e)                                                                                                         |                           |
| 1965 | 3529 | <a href="#">NEOS13_1933</a>        | peg | 3529_22130_22243 | 22130 | 22243 | + | hypothetical protein                                                                                                                    |                           |
| 1966 | 3529 | <a href="#">NEOS13_1934</a>        | peg | 3529_24249_22735 | 24249 | 22735 | - | integral membrane protein MviN                                                                                                          |                           |
| 1967 | 3529 | <a href="#">NEOS13_1935</a>        | peg | 3529_24517_25473 | 24517 | 25473 | + | Endonuclease IV (EC 3.1.21.2)                                                                                                           |                           |
| 1968 | 3529 | <a href="#">NEOS13_1936</a>        | peg | 3529_25484_26887 | 25484 | 26887 | + | Asparaginyl-tRNA synthetase (EC 6.1.1.22)                                                                                               |                           |
| 1969 | 3529 | <a href="#">NEOS13_1937</a>        | peg | 3529_27951_28655 | 27951 | 28655 | + | hypothetical protein                                                                                                                    |                           |
| 1970 | 3529 | <a href="#">NEOS13_1938</a>        | peg | 3529_28633_28776 | 28633 | 28776 | + | hypothetical protein                                                                                                                    |                           |
| 1971 | 3529 | <a href="#">NEOS13_1939</a>        | peg | 3529_28808_28969 | 28808 | 28969 | + | hypothetical protein                                                                                                                    |                           |
| 1972 | 3529 | <a href="#">NEOS13_1940</a>        | peg | 3529_29357_29662 | 29357 | 29662 | + | hypothetical protein                                                                                                                    |                           |
| 1973 | 3529 | <a href="#">NEOS13_1941</a>        | peg | 3529_31344_29707 | 31344 | 29707 | - | NAD synthetase (EC 6.3.1.5) /<br>Glutamine amidotransferase chain of<br>NAD synthetase                                                  |                           |
| 1974 | 3529 | <a href="#">NEOS13_1942</a>        | peg | 3529_32693_31362 | 32693 | 31362 | - | Na(+)-translocating NADH-quinone<br>reductase subunit F (EC 1.6.5.-)                                                                    | Oxidative_Phosphorylation |
| 1975 | 3529 | <a href="#">NEOS13_1943</a>        | peg | 3529_32859_34715 | 32859 | 34715 | + | Chaperone protein HtpG                                                                                                                  |                           |
| 1976 | 3529 | <a href="#">NEOS13_1944</a>        | peg | 3529_34798_35934 | 34798 | 35934 | + | hypothetical protein                                                                                                                    |                           |
| 1977 | 3529 | <a href="#">NEOS13_1945</a>        | peg | 3529_36016_36189 | 36016 | 36189 | + | hypothetical protein                                                                                                                    |                           |
| 1978 | 3529 | <a href="#">NEOS13_1946</a>        | peg | 3529_36250_36933 | 36250 | 36933 | + | hypothetical protein                                                                                                                    |                           |
| 1979 | 3529 | <a href="#">NEOS13_1947</a>        | peg | 3529_37436_41953 | 37436 | 41953 | + | hypothetical protein                                                                                                                    |                           |
| 1980 | 3529 | <a href="#">NEOS13_1948</a>        | peg | 3529_42168_43589 | 42168 | 43589 | + | hypothetical protein                                                                                                                    |                           |
| 1981 | 3529 | <a href="#">NEOS13_1949</a>        | peg | 3529_44312_43848 | 44312 | 43848 | - | Mobile element protein                                                                                                                  |                           |
| 1982 | 3531 | <a href="#">NEOS13_1950</a>        | peg | 3531_1962_4133   | 1962  | 4133  | + | Lead, cadmium, zinc and mercury<br>transporting ATPase (EC 3.6.3.3) (EC<br>3.6.3.5); Copper-translocating P-type<br>ATPase (EC 3.6.3.4) |                           |
| 1983 | 3531 | <a href="#">NEOS13_1951</a>        | peg | 3531_4836_4717   | 4836  | 4717  | - | hypothetical protein                                                                                                                    |                           |
| 1984 | 3531 | <a href="#">NEOS13_1952</a>        | peg | 3531_4939_4811   | 4939  | 4811  | - | hypothetical protein                                                                                                                    |                           |
| 1985 | 3531 | <a href="#">NEOS13_1953</a>        | peg | 3531_4942_6072   | 4942  | 6072  | + | hypothetical protein                                                                                                                    |                           |
| 1986 | 3531 | <a href="#">NEOS13_1954</a>        | peg | 3531_6432_6289   | 6432  | 6289  | - | hypothetical protein                                                                                                                    |                           |
| 1987 | 3531 | <a href="#">NEOS13_1955</a>        | peg | 3531_6618_8033   | 6618  | 8033  | + | DNA methylation and regulatory protein<br>Ada (EC:2.1.1.63)                                                                             |                           |
| 1988 | 3531 | <a href="#">NEOS13_1956</a>        | peg | 3531_8062_8550   | 8062  | 8550  | + | Methylated-DNA--protein-cysteine<br>methyltransferase (EC 2.1.1.63)                                                                     |                           |
| 1989 | 3531 | <a href="#">NEOS13_1957</a>        | peg | 3531_8987_8817   | 8987  | 8817  | - | hypothetical protein                                                                                                                    |                           |
| 1990 | 3532 | <a href="#">NEOS13_1958</a>        | peg | 3532_33_1193     | 33    | 1193  | + | hypothetical protein                                                                                                                    |                           |
| 1991 | 3532 | <a href="#">NEOS13_1959</a>        | peg | 3532_1877_2053   | 1877  | 2053  | + | transmembrane protein                                                                                                                   |                           |
| 1992 | 3532 | <a href="#">NEOS13_1960</a>        | peg | 3532_2328_2588   | 2328  | 2588  | + | hypothetical protein                                                                                                                    |                           |
| 1993 | 3532 | <a href="#">NEOS13_1961</a>        | peg | 3532_2718_3419   | 2718  | 3419  | + | MgtC/SapB transporter                                                                                                                   |                           |
| 1994 | 3532 | <a href="#">NEOS13_1962</a>        | peg | 3532_3591_3749   | 3591  | 3749  | + | hypothetical protein                                                                                                                    |                           |
| 1995 | 3532 | <a href="#">NEOS13_1963</a>        | peg | 3532_4193_4975   | 4193  | 4975  | + | hypothetical protein                                                                                                                    |                           |
| 1996 | 3532 | <a href="#">NEOS13_1964</a>        | peg | 3532_5872_5453   | 5872  | 5453  | - | hypothetical protein                                                                                                                    |                           |
| 1997 | 3532 | <a href="#">NEOS13_1965</a>        | peg | 3532_7728_6220   | 7728  | 6220  | - | hypothetical protein                                                                                                                    |                           |
| 1998 | 3532 | <a href="#">NEOS13_1966</a>        | peg | 3532_8758_7685   | 8758  | 7685  | - | hypothetical protein                                                                                                                    |                           |
| 1999 | 3532 | <a href="#">NEOS13_1967</a>        | peg | 3532_8768_8977   | 8768  | 8977  | + | hypothetical protein                                                                                                                    |                           |
| 2000 | 3532 | <a href="#">NEOS13_1968</a>        | peg | 3532_9680_8994   | 9680  | 8994  | - | ABC transporter-related protein                                                                                                         | ABC_transporter           |
| 2001 | 3532 | <a href="#">NEOS13_1969</a>        | peg | 3532_10846_9689  | 10846 | 9689  | - | ABC-transporter permease protein,<br>putative                                                                                           | ABC_transporter           |
| 2002 | 3532 | <a href="#">NEOS13_1970</a>        | peg | 3532_11061_11996 | 11061 | 11996 | + | heme ABC transporter, ATP-binding<br>protein                                                                                            | ABC_transporter           |
| 2003 | 3532 | <a href="#">NEOS13_1971</a>        | peg | 3532_11986_12768 | 11986 | 12768 | + | ABC-2 type transporter                                                                                                                  | ABC_transporter           |
| 2004 | 3532 | <a href="#">NEOS13_1972</a>        | peg | 3532_12809_13087 | 12809 | 13087 | + | hypothetical protein                                                                                                                    |                           |
| 2005 | 3532 | <a href="#">NEOS13_1973</a>        | peg | 3532_13210_13097 | 13210 | 13097 | - | hypothetical protein                                                                                                                    |                           |
| 2006 | 3532 | <a href="#">NEOS13_1974</a>        | peg | 3532_13764_13351 | 13764 | 13351 | - | hypothetical protein                                                                                                                    |                           |
| 2007 | 3532 | <a href="#">NEOS13_1975</a>        | peg | 3532_14197_13910 | 14197 | 13910 | - | hypothetical protein                                                                                                                    |                           |
| 2008 | 3532 | <a href="#">NEOS13_1976</a>        | peg | 3532_14271_14399 | 14271 | 14399 | + | hypothetical protein                                                                                                                    |                           |
| 2009 | 3532 | <a href="#">NEOS13_1977</a>        | peg | 3532_14624_15088 | 14624 | 15088 | + | hypothetical protein                                                                                                                    |                           |
| 2010 | 3532 | <a href="#">NEOS13_1978</a>        | peg | 3532_15089_15418 | 15089 | 15418 | + | hypothetical protein                                                                                                                    |                           |
| 2011 | 3532 | <a href="#">NEOS13_1979</a>        | peg | 3532_15735_16322 | 15735 | 16322 | + | hypothetical protein                                                                                                                    |                           |
| 2012 | 3532 | <a href="#">NEOS13_1980</a>        | peg | 3532_16319_17173 | 16319 | 17173 | + | hypothetical protein                                                                                                                    |                           |
| 2013 | 3532 | <a href="#">NEOS13_0033m<br/>a</a> | rna | 3532_17694_17612 | 17694 | 17612 | - | tRNA-Leu-CAA                                                                                                                            | RNA                       |
| 2014 | 3532 | <a href="#">NEOS13_1981</a>        | peg | 3532_19234_17834 | 19234 | 17834 | - | hypothetical protein                                                                                                                    |                           |
| 2015 | 3532 | <a href="#">NEOS13_1982</a>        | peg | 3532_20497_19328 | 20497 | 19328 | - | conserved hypothetical protein                                                                                                          |                           |
| 2016 | 3532 | <a href="#">NEOS13_1983</a>        | peg | 3532_20598_21290 | 20598 | 21290 | + | PqqC-like protein                                                                                                                       |                           |
| 2017 | 3532 | <a href="#">NEOS13_1984</a>        | peg | 3532_21324_22355 | 21324 | 22355 | + | putative proteinase IV                                                                                                                  |                           |
| 2018 | 3532 | <a href="#">NEOS13_1985</a>        | peg | 3532_22521_25202 | 22521 | 25202 | + | DNA polymerase I (EC 2.7.7.7)                                                                                                           |                           |
| 2019 | 3532 | <a href="#">NEOS13_1986</a>        | peg | 3532_25436_25801 | 25436 | 25801 | + | Dephospho-CoA kinase (EC 2.7.1.24)                                                                                                      | Coenzyme_A_biosynthesis   |
| 2020 | 3532 | <a href="#">NEOS13_1987</a>        | peg | 3532_25823_27190 | 25823 | 27190 | + | Transcription termination factor Rho                                                                                                    |                           |
| 2021 | 3532 | <a href="#">NEOS13_1988</a>        | peg | 3532_27286_28146 | 27286 | 28146 | + | hypothetical protein                                                                                                                    |                           |
| 2022 | 3532 | <a href="#">NEOS13_1989</a>        | peg | 3532_28516_28656 | 28516 | 28656 | + | hypothetical protein                                                                                                                    |                           |
| 2023 | 3533 | <a href="#">NEOS13_1990</a>        | peg | 3533_33_1193     | 33    | 1193  | + | hypothetical protein                                                                                                                    |                           |
| 2024 | 3533 | <a href="#">NEOS13_1991</a>        | peg | 3533_2621_1404   | 2621  | 1404  | - | Leucine-rich repeat containing protein                                                                                                  | Leucine-rich repeat       |
| 2025 | 3534 | <a href="#">NEOS13_1992</a>        | peg | 3534_33_1193     | 33    | 1193  | + | hypothetical protein                                                                                                                    |                           |
| 2026 | 3537 | <a href="#">NEOS13_1993</a>        | peg | 3537_404_33      | 404   | 33    | - | hypothetical protein                                                                                                                    |                           |
| 2027 | 3537 | <a href="#">NEOS13_1994</a>        | peg | 3537_1046_405    | 1046  | 405   | - | hypothetical protein                                                                                                                    |                           |
| 2028 | 3537 | <a href="#">NEOS13_1995</a>        | peg | 3537_1688_1047   | 1688  | 1047  | - | hypothetical protein                                                                                                                    |                           |
| 2029 | 3537 | <a href="#">NEOS13_1996</a>        | peg | 3537_2111_1689   | 2111  | 1689  | - | hypothetical protein                                                                                                                    |                           |
| 2030 | 3537 | <a href="#">NEOS13_1997</a>        | peg | 3537_3000_2194   | 3000  | 2194  | - | hypothetical protein                                                                                                                    |                           |
| 2031 | 3537 | <a href="#">NEOS13_1998</a>        | peg | 3537_5602_3440   | 5602  | 3440  | - | hypothetical protein                                                                                                                    |                           |
| 2032 | 3537 | <a href="#">NEOS13_1999</a>        | peg | 3537_5731_5937   | 5731  | 5937  | + | hypothetical protein                                                                                                                    |                           |
| 2033 | 3538 | <a href="#">NEOS13_2000</a>        | peg | 3538_46_1299     | 46    | 1299  | + | Mobile element protein                                                                                                                  |                           |
| 2034 | 3539 | <a href="#">NEOS13_2001</a>        | peg | 3539_24_314      | 24    | 314   | + | Mobile element protein                                                                                                                  |                           |
| 2035 | 3539 | <a href="#">NEOS13_2002</a>        | peg | 3539_422_904     | 422   | 904   | + | Transposase, IS4 family protein                                                                                                         | Transposase               |
| 2036 | 3539 | <a href="#">NEOS13_2003</a>        | peg | 3539_1230_1111   | 1230  | 1111  | - | hypothetical protein                                                                                                                    |                           |
| 2037 | 3539 | <a href="#">NEOS13_2004</a>        | peg | 3539_2495_1227   | 2495  | 1227  | - | NADH dehydrogenase (EC 1.6.99.3)                                                                                                        | Oxidative_Phosphorylation |
| 2038 | 3539 | <a href="#">NEOS13_2005</a>        | peg | 3539_3669_2608   | 3669  | 2608  | - | Cytochrome c551 peroxidase (EC<br>1.11.1.5)                                                                                             |                           |

|      |      |                             |     |                  |       |       |   |                                                                          |                         |
|------|------|-----------------------------|-----|------------------|-------|-------|---|--------------------------------------------------------------------------|-------------------------|
| 2039 | 3539 | <a href="#">NEOS13_2006</a> | peg | 3539_3917_4069   | 3917  | 4069  | + | hypothetical protein                                                     |                         |
| 2040 | 3539 | <a href="#">NEOS13_2007</a> | peg | 3539_5560_4481   | 5560  | 4481  | - | Fructose-bisphosphate aldolase class I (EC 4.1.2.13)                     | Glycolysis_Glucogenesis |
| 2041 | 3539 | <a href="#">NEOS13_2008</a> | peg | 3539_5790_7505   | 5790  | 7505  | + | hypothetical protein                                                     |                         |
| 2042 | 3539 | <a href="#">NEOS13_2009</a> | peg | 3539_8259_8074   | 8259  | 8074  | - | hypothetical protein                                                     |                         |
| 2043 | 3539 | <a href="#">NEOS13_2010</a> | peg | 3539_8266_8859   | 8266  | 8859  | + | hypothetical protein                                                     |                         |
| 2044 | 3539 | <a href="#">NEOS13_2011</a> | peg | 3539_9184_9363   | 9184  | 9363  | + | hypothetical protein                                                     |                         |
| 2045 | 3539 | <a href="#">NEOS13_2012</a> | peg | 3539_9539_9658   | 9539  | 9658  | + | hypothetical protein                                                     |                         |
| 2046 | 3539 | <a href="#">NEOS13_2013</a> | peg | 3539_12902_9843  | 12902 | 9843  | - | RND multidrug efflux transporter; Acriflavin resistance protein          |                         |
| 2047 | 3539 | <a href="#">NEOS13_2014</a> | peg | 3539_13777_12965 | 13777 | 12965 | - | RND efflux membrane fusion protein, acriflavin resistance protein E      |                         |
| 2048 | 3539 | <a href="#">NEOS13_2015</a> | peg | 3539_14688_13792 | 14688 | 13792 | - | outer membrane efflux protein, putative                                  |                         |
| 2049 | 3539 | <a href="#">NEOS13_2016</a> | peg | 3539_16291_15305 | 16291 | 15305 | - | hypothetical protein                                                     |                         |
| 2050 | 3539 | <a href="#">NEOS13_2017</a> | peg | 3539_17782_16565 | 17782 | 16565 | - | DEAD/DEAH box helicase-like                                              |                         |
| 2051 | 3539 | <a href="#">NEOS13_2018</a> | peg | 3539_18458_18339 | 18458 | 18339 | - | hypothetical protein                                                     |                         |
| 2052 | 3540 | <a href="#">NEOS13_2019</a> | peg | 3540_277_1773    | 277   | 1773  | + | hypothetical protein                                                     |                         |
| 2053 | 3540 | <a href="#">NEOS13_2020</a> | peg | 3540_2361_3866   | 2361  | 3866  | + | Outer membrane component of tripartite multidrug resistance system       |                         |
| 2054 | 3540 | <a href="#">NEOS13_2021</a> | peg | 3540_4016_3834   | 4016  | 3834  | - | hypothetical protein                                                     |                         |
| 2055 | 3540 | <a href="#">NEOS13_2022</a> | peg | 3540_4695_5150   | 4695  | 5150  | + | RND family multidrug resistance secretion protein                        |                         |
| 2056 | 3540 | <a href="#">NEOS13_2023</a> | peg | 3540_5153_6703   | 5153  | 6703  | + | Inner membrane component of tripartite multidrug resistance system       |                         |
| 2057 | 3540 | <a href="#">NEOS13_2024</a> | peg | 3540_8617_6878   | 8617  | 6878  | - | hypothetical protein                                                     |                         |
| 2058 | 3540 | <a href="#">NEOS13_2025</a> | peg | 3540_9141_8731   | 9141  | 8731  | - | putative stress-induced protein OsmC                                     |                         |
| 2059 | 3540 | <a href="#">NEOS13_2026</a> | peg | 3540_9478_9341   | 9478  | 9341  | - | hypothetical protein                                                     |                         |
| 2060 | 3540 | <a href="#">NEOS13_2027</a> | peg | 3540_9774_10556  | 9774  | 10556 | + | hypothetical protein                                                     |                         |
| 2061 | 3540 | <a href="#">NEOS13_2028</a> | peg | 3540_10541_10666 | 10541 | 10666 | + | hypothetical protein                                                     |                         |
| 2062 | 3540 | <a href="#">NEOS13_2029</a> | peg | 3540_10975_10733 | 10975 | 10733 | - | hypothetical protein                                                     |                         |
| 2063 | 3541 | <a href="#">NEOS13_2030</a> | peg | 3541_339_145     | 339   | 145   | - | hypothetical protein                                                     |                         |
| 2064 | 3541 | <a href="#">NEOS13_2031</a> | peg | 3541_864_505     | 864   | 505   | - | Leucine-rich repeat containing protein                                   | Leucine-rich repeat     |
| 2065 | 3542 | <a href="#">NEOS13_2032</a> | peg | 3542_537_650     | 537   | 650   | + | hypothetical protein                                                     |                         |
| 2066 | 3542 | <a href="#">NEOS13_2033</a> | peg | 3542_1485_1345   | 1485  | 1345  | - | hypothetical protein                                                     |                         |
| 2067 | 3542 | <a href="#">NEOS13_2034</a> | peg | 3542_1451_1888   | 1451  | 1888  | + | hypothetical protein                                                     |                         |
| 2068 | 3542 | <a href="#">NEOS13_2035</a> | peg | 3542_2363_3040   | 2363  | 3040  | + | Leucine-rich repeat containing protein                                   | Leucine-rich repeat     |
| 2069 | 3542 | <a href="#">NEOS13_2036</a> | peg | 3542_4015_4149   | 4015  | 4149  | + | hypothetical protein                                                     |                         |
| 2070 | 3542 | <a href="#">NEOS13_2037</a> | peg | 3542_7426_4523   | 7426  | 4523  | - | hypothetical protein                                                     |                         |
| 2071 | 3542 | <a href="#">NEOS13_2038</a> | peg | 3542_10490_8400  | 10490 | 8400  | - | Polyribonucleotide nucleotidyltransferase (EC 2.7.7.8)                   |                         |
| 2072 | 3542 | <a href="#">NEOS13_2039</a> | peg | 3542_11052_10783 | 11052 | 10783 | - | SSU ribosomal protein S15p (S13e)                                        |                         |
| 2073 | 3542 | <a href="#">NEOS13_2040</a> | peg | 3542_11392_12066 | 11392 | 12066 | + | hypothetical protein                                                     |                         |
| 2074 | 3542 | <a href="#">NEOS13_2041</a> | peg | 3542_12069_12572 | 12069 | 12572 | + | tRNA-specific adenosine-34 deaminase (EC 3.5.4.-)                        |                         |
| 2075 | 3542 | <a href="#">NEOS13_2042</a> | peg | 3542_12959_12837 | 12959 | 12837 | - | hypothetical protein                                                     |                         |
| 2076 | 3542 | <a href="#">NEOS13_2043</a> | peg | 3542_14550_13195 | 14550 | 13195 | - | WD-40 repeat protein                                                     |                         |
| 2077 | 3542 | <a href="#">NEOS13_2044</a> | peg | 3542_15335_15096 | 15335 | 15096 | - | hypothetical protein                                                     |                         |
| 2078 | 3542 | <a href="#">NEOS13_2045</a> | peg | 3542_16520_15669 | 16520 | 15669 | - | hypothetical protein                                                     |                         |
| 2079 | 3542 | <a href="#">NEOS13_2046</a> | peg | 3542_16840_17175 | 16840 | 17175 | + | LSU ribosomal protein L31p                                               |                         |
| 2080 | 3542 | <a href="#">NEOS13_2047</a> | peg | 3542_17253_18320 | 17253 | 18320 | + | Peptide chain release factor 1                                           |                         |
| 2081 | 3542 | <a href="#">NEOS13_2048</a> | peg | 3542_18560_19408 | 18560 | 19408 | + | Methylase of polypeptide chain release factors                           |                         |
| 2082 | 3542 | <a href="#">NEOS13_2049</a> | peg | 3542_19450_20778 | 19450 | 20778 | + | Signal recognition particle, subunit Ffh SRP54 (TC 3.A.5.1.1)            | Sec_T2SS                |
| 2083 | 3542 | <a href="#">NEOS13_2050</a> | peg | 3542_20769_21101 | 20769 | 21101 | + | SSU ribosomal protein S16p                                               |                         |
| 2084 | 3542 | <a href="#">NEOS13_2051</a> | peg | 3542_21180_21803 | 21180 | 21803 | + | tRNA (Guanine37-N1) - methyltransferase (EC 2.1.1.31)                    |                         |
| 2085 | 3542 | <a href="#">NEOS13_2052</a> | peg | 3542_21809_22225 | 21809 | 22225 | + | LSU ribosomal protein L19p                                               |                         |
| 2086 | 3542 | <a href="#">NEOS13_2053</a> | peg | 3542_22235_22918 | 22235 | 22918 | + | Ribonuclease HII (EC 3.1.26.4)                                           |                         |
| 2087 | 3542 | <a href="#">NEOS13_2054</a> | peg | 3542_23039_23791 | 23039 | 23791 | + | hypothetical protein                                                     |                         |
| 2088 | 3542 | <a href="#">NEOS13_2055</a> | peg | 3542_24725_24853 | 24725 | 24853 | + | hypothetical protein                                                     |                         |
| 2089 | 3543 | <a href="#">NEOS13_2056</a> | peg | 3543_540_2618    | 540   | 2618  | + | Protein export cytoplasm protein SecA ATPase RNA helicase (TC 3.A.5.1.1) |                         |
| 2090 | 3543 | <a href="#">NEOS13_2057</a> | peg | 3543_2588_3097   | 2588  | 3097  | + | hypothetical protein                                                     |                         |
| 2091 | 3543 | <a href="#">NEOS13_2058</a> | peg | 3543_3372_3911   | 3372  | 3911  | + | hypothetical protein                                                     |                         |
| 2092 | 3543 | <a href="#">NEOS13_2059</a> | peg | 3543_4708_4920   | 4708  | 4920  | + | hypothetical protein                                                     |                         |
| 2093 | 3543 | <a href="#">NEOS13_2060</a> | peg | 3543_5960_5031   | 5960  | 5031  | - | Mobile element protein                                                   |                         |
| 2094 | 3543 | <a href="#">NEOS13_2061</a> | peg | 3543_6091_6267   | 6091  | 6267  | + | hypothetical protein                                                     |                         |
| 2095 | 3543 | <a href="#">NEOS13_2062</a> | peg | 3543_6322_6465   | 6322  | 6465  | + | hypothetical protein                                                     |                         |
| 2096 | 3543 | <a href="#">NEOS13_2063</a> | peg | 3543_6848_7405   | 6848  | 7405  | + | Peptidyl-prolyl cis-trans isomerase (EC 5.2.1.8)                         |                         |
| 2097 | 3543 | <a href="#">NEOS13_2064</a> | peg | 3543_7641_7477   | 7641  | 7477  | - | hypothetical protein                                                     |                         |
| 2098 | 3543 | <a href="#">NEOS13_2065</a> | peg | 3543_8729_7785   | 8729  | 7785  | - | Predicted hydrolase of the alpha/beta-hydrolase fold                     |                         |
| 2099 | 3543 | <a href="#">NEOS13_2066</a> | peg | 3543_10033_9140  | 10033 | 9140  | - | Methionine aminopeptidase (EC 3.4.11.18)                                 |                         |
| 2100 | 3543 | <a href="#">NEOS13_2067</a> | peg | 3543_10394_10645 | 10394 | 10645 | + | hypothetical protein                                                     |                         |
| 2101 | 3543 | <a href="#">NEOS13_2068</a> | peg | 3543_11855_10695 | 11855 | 10695 | - | hypothetical protein                                                     | Outer membrane protein  |
| 2102 | 3544 | <a href="#">NEOS13_2069</a> | peg | 3544_65_664      | 65    | 664   | + | hypothetical protein                                                     |                         |
| 2103 | 3544 | <a href="#">NEOS13_2070</a> | peg | 3544_1406_1567   | 1406  | 1567  | + | hypothetical protein                                                     |                         |
| 2104 | 3545 | <a href="#">NEOS13_2071</a> | peg | 3545_329_454     | 329   | 454   | + | hypothetical protein                                                     |                         |
| 2105 | 3545 | <a href="#">NEOS13_2072</a> | peg | 3545_948_676     | 948   | 676   | - | DNA-damage-inducible protein J                                           |                         |
| 2106 | 3545 | <a href="#">NEOS13_2073</a> | peg | 3545_1412_1290   | 1412  | 1290  | - | hypothetical protein                                                     |                         |
| 2107 | 3547 | <a href="#">NEOS13_2074</a> | peg | 3547_838_1407    | 838   | 1407  | + | hypothetical protein                                                     |                         |
| 2108 | 3547 | <a href="#">NEOS13_2075</a> | peg | 3547_1658_1533   | 1658  | 1533  | - | hypothetical protein                                                     |                         |
| 2109 | 3547 | <a href="#">NEOS13_2076</a> | peg | 3547_2116_1787   | 2116  | 1787  | - | hypothetical protein                                                     |                         |
| 2110 | 3547 | <a href="#">NEOS13_2077</a> | peg | 3547_2487_2362   | 2487  | 2362  | - | hypothetical protein                                                     |                         |
| 2111 | 3547 | <a href="#">NEOS13_2078</a> | peg | 3547_3233_2628   | 3233  | 2628  | - | putative rRNA methylase                                                  |                         |

|      |      |                               |     |                  |       |       |   |                                                                                                                         |                           |
|------|------|-------------------------------|-----|------------------|-------|-------|---|-------------------------------------------------------------------------------------------------------------------------|---------------------------|
| 2112 | 3547 | <a href="#">NEOS13_2079</a>   | peg | 3547_3774_3262   | 3774  | 3262  | - | hypothetical protein                                                                                                    |                           |
| 2113 | 3547 | <a href="#">NEOS13_2080</a>   | peg | 3547_4254_3778   | 4254  | 3778  | - | hypothetical protein                                                                                                    |                           |
| 2114 | 3547 | <a href="#">NEOS13_2081</a>   | peg | 3547_4307_4804   | 4307  | 4804  | + | [leader (60) peptide-periplasmic]                                                                                       |                           |
| 2115 | 3547 | <a href="#">NEOS13_2082</a>   | peg | 3547_5250_4945   | 5250  | 4945  | - | SSU ribosomal protein S14p (S29e) @<br>SSU ribosomal protein S14p (S29e),<br>zinc-independent                           |                           |
| 2116 | 3547 | <a href="#">NEOS13_2083</a>   | peg | 3547_5403_5266   | 5403  | 5266  | - | LSU ribosomal protein L36p                                                                                              |                           |
| 2117 | 3547 | <a href="#">NEOS13_2084</a>   | peg | 3547_5722_5859   | 5722  | 5859  | + | LSU ribosomal protein L34p                                                                                              |                           |
| 2118 | 3547 | <a href="#">NEOS13_2085</a>   | peg | 3547_5856_6209   | 5856  | 6209  | + | ribonuclease P                                                                                                          |                           |
| 2119 | 3547 | <a href="#">NEOS13_2086</a>   | peg | 3547_6193_8199   | 6193  | 8199  | + | ATP-dependent DNA helicase<br>UvrD/PcrA                                                                                 |                           |
| 2120 | 3547 | <a href="#">NEOS13_2087</a>   | peg | 3547_9512_8472   | 9512  | 8472  | - | thioredoxin/thiol-disulfide isomerase                                                                                   |                           |
| 2121 | 3547 | <a href="#">NEOS13_2088</a>   | peg | 3547_9594_10064  | 9594  | 10064 | + | hypothetical protein                                                                                                    |                           |
| 2122 | 3547 | <a href="#">NEOS13_2089</a>   | peg | 3547_10637_12004 | 10637 | 12004 | + | sodium/alanine symporter family<br>protein                                                                              |                           |
| 2123 | 3547 | <a href="#">NEOS13_2090</a>   | peg | 3547_12509_12703 | 12509 | 12703 | + | hypothetical protein                                                                                                    |                           |
| 2124 | 3547 | <a href="#">NEOS13_2091</a>   | peg | 3547_13961_13359 | 13961 | 13359 | - | CDP-diacylglycerol--glycerol-3-<br>phosphate 3-phosphatidyltransferase<br>(EC 2.7.8.5)                                  |                           |
| 2125 | 3547 | <a href="#">NEOS13_2092</a>   | peg | 3547_15580_14054 | 15580 | 14054 | - | Glycogen synthase, ADP-glucose<br>transglucosylase (EC 2.4.1.21)                                                        |                           |
| 2126 | 3547 | <a href="#">NEOS13_2093</a>   | peg | 3547_15730_15873 | 15730 | 15873 | + | hypothetical protein                                                                                                    |                           |
| 2127 | 3547 | <a href="#">NEOS13_0034ma</a> | rna | 3547_16124_16195 | 16124 | 16195 | + | tRNA-Gln-TTG                                                                                                            | RNA                       |
| 2128 | 3547 | <a href="#">NEOS13_2094</a>   | peg | 3547_16222_17148 | 16222 | 17148 | + | Ribose-phosphate pyrophosphokinase<br>(EC 2.7.6.1)                                                                      |                           |
| 2129 | 3547 | <a href="#">NEOS13_2095</a>   | peg | 3547_17228_17791 | 17228 | 17791 | + | LSU ribosomal protein L25p                                                                                              |                           |
| 2130 | 3547 | <a href="#">NEOS13_2096</a>   | peg | 3547_17828_18400 | 17828 | 18400 | + | Peptidyl-tRNA hydrolase (EC 3.1.1.29)                                                                                   |                           |
| 2131 | 3547 | <a href="#">NEOS13_2097</a>   | peg | 3547_18442_18789 | 18442 | 18789 | + | SSU ribosomal protein S6p                                                                                               |                           |
| 2132 | 3547 | <a href="#">NEOS13_2098</a>   | peg | 3547_18802_19059 | 18802 | 19059 | + | SSU ribosomal protein S18p @ SSU<br>ribosomal protein S18p, zinc-<br>independent                                        |                           |
| 2133 | 3547 | <a href="#">NEOS13_2099</a>   | peg | 3547_19078_19575 | 19078 | 19575 | + | LSU ribosomal protein L9p                                                                                               |                           |
| 2134 | 3547 | <a href="#">NEOS13_2100</a>   | peg | 3547_19671_20516 | 19671 | 20516 | + | 4-diphosphocytidyl-2-C-methyl-D-<br>erythritol kinase (EC 2.7.1.148)                                                    |                           |
| 2135 | 3547 | <a href="#">NEOS13_2101</a>   | peg | 3547_20749_21735 | 20749 | 21735 | + | ADP-L-glycero-D-manno-heptose-6-<br>epimerase (EC 5.1.3.20)                                                             |                           |
| 2136 | 3547 | <a href="#">NEOS13_2102</a>   | peg | 3547_21795_23021 | 21795 | 23021 | + | ADP-heptose synthase (EC 2.7.-.-) / D-<br>glycero-beta-D-manno-heptose 7-<br>phosphate kinase                           |                           |
| 2137 | 3547 | <a href="#">NEOS13_2103</a>   | peg | 3547_23447_25234 | 23447 | 25234 | + | DNA primase (EC 2.7.7.-)                                                                                                |                           |
| 2138 | 3547 | <a href="#">NEOS13_2104</a>   | peg | 3547_25315_26994 | 25315 | 26994 | + | Leucine-rich repeat containing protein                                                                                  | Leucine-rich repeat       |
| 2139 | 3547 | <a href="#">NEOS13_2105</a>   | peg | 3547_28532_27348 | 28532 | 27348 | - | Outer membrane autotransporter barrel                                                                                   |                           |
| 2140 | 3547 | <a href="#">NEOS13_2106</a>   | peg | 3547_29105_28695 | 29105 | 28695 | - | hypothetical protein                                                                                                    |                           |
| 2141 | 3547 | <a href="#">NEOS13_2107</a>   | peg | 3547_29480_29277 | 29480 | 29277 | - | hypothetical protein                                                                                                    |                           |
| 2142 | 3547 | <a href="#">NEOS13_2108</a>   | peg | 3547_31301_29637 | 31301 | 29637 | - | Phosphoglucosmutase (EC 5.4.2.2)                                                                                        |                           |
| 2143 | 3547 | <a href="#">NEOS13_2109</a>   | peg | 3547_31666_32172 | 31666 | 32172 | + | Non-specific DNA-binding protein Dps<br>/ Iron-binding ferritin-like antioxidant<br>protein / Ferroxidase (EC 1.16.3.1) |                           |
| 2144 | 3547 | <a href="#">NEOS13_2110</a>   | peg | 3547_32177_32296 | 32177 | 32296 | + | hypothetical protein                                                                                                    |                           |
| 2145 | 3547 | <a href="#">NEOS13_2111</a>   | peg | 3547_32622_33518 | 32622 | 33518 | + | Cytochrome O ubiquinol oxidase<br>subunit II (EC 1.10.3.-)                                                              | Oxidative_Phosphorylation |
| 2146 | 3547 | <a href="#">NEOS13_2112</a>   | peg | 3547_33558_33866 | 33558 | 33866 | + | Cytochrome O ubiquinol oxidase<br>subunit I (EC 1.10.3.-)                                                               | Oxidative_Phosphorylation |
| 2147 | 3548 | <a href="#">NEOS13_2113</a>   | peg | 3548_295_182     | 295   | 182   | - | hypothetical protein                                                                                                    |                           |
| 2148 | 3548 | <a href="#">NEOS13_2114</a>   | peg | 3548_1102_524    | 1102  | 524   | - | hypothetical protein                                                                                                    |                           |
| 2149 | 3548 | <a href="#">NEOS13_2115</a>   | peg | 3548_2936_1659   | 2936  | 1659  | - | putative aminopeptidase 2                                                                                               |                           |
| 2150 | 3548 | <a href="#">NEOS13_2116</a>   | peg | 3548_4579_3302   | 4579  | 3302  | - | Seryl-tRNA synthetase (EC 6.1.1.11)                                                                                     |                           |
| 2151 | 3548 | <a href="#">NEOS13_2117</a>   | peg | 3548_4854_7778   | 4854  | 7778  | + | peptidase M16 domain protein                                                                                            |                           |
| 2152 | 3548 | <a href="#">NEOS13_2118</a>   | peg | 3548_9651_8311   | 9651  | 8311  | - | High-affinity carbon uptake protein<br>Hat/HatR                                                                         |                           |
| 2153 | 3548 | <a href="#">NEOS13_2119</a>   | peg | 3548_9819_9974   | 9819  | 9974  | + | hypothetical protein                                                                                                    |                           |
| 2154 | 3548 | <a href="#">NEOS13_2120</a>   | peg | 3548_11067_10042 | 11067 | 10042 | - | putative glycerol-3-phosphate<br>acyltransferase                                                                        |                           |
| 2155 | 3548 | <a href="#">NEOS13_2121</a>   | peg | 3548_12614_11076 | 12614 | 11076 | - | Cytoplasmic axial filament protein CafA<br>and Ribonuclease G (EC 3.1.4.-)                                              |                           |
| 2156 | 3548 | <a href="#">NEOS13_2122</a>   | peg | 3548_13100_13615 | 13100 | 13615 | + | hypothetical protein                                                                                                    |                           |
| 2157 | 3548 | <a href="#">NEOS13_2123</a>   | peg | 3548_13647_13826 | 13647 | 13826 | + | LSU ribosomal protein L32p                                                                                              |                           |
| 2158 | 3548 | <a href="#">NEOS13_2124</a>   | peg | 3548_13847_14863 | 13847 | 14863 | + | Phosphate:acyl-ACP acyltransferase<br>PlsX                                                                              |                           |
| 2159 | 3548 | <a href="#">NEOS13_2125</a>   | peg | 3548_15464_15006 | 15464 | 15006 | - | Error-prone repair protein UmuD                                                                                         |                           |
| 2160 | 3548 | <a href="#">NEOS13_2126</a>   | peg | 3548_16267_15584 | 16267 | 15584 | - | hypothetical protein                                                                                                    |                           |
| 2161 | 3548 | <a href="#">NEOS13_2127</a>   | peg | 3548_17427_16264 | 17427 | 16264 | - | Lipid-A-disaccharide synthase (EC<br>2.4.1.182)                                                                         |                           |
| 2162 | 3548 | <a href="#">NEOS13_2128</a>   | peg | 3548_18121_17417 | 18121 | 17417 | - | Lipid-A-disaccharide synthase (EC<br>2.4.1.182)                                                                         |                           |
| 2163 | 3548 | <a href="#">NEOS13_2129</a>   | peg | 3548_18834_18118 | 18834 | 18118 | - | putative dolichol-phosphate<br>mannosyltransferase                                                                      |                           |
| 2164 | 3548 | <a href="#">NEOS13_2130</a>   | peg | 3548_19790_19047 | 19790 | 19047 | - | unknown protein                                                                                                         |                           |
| 2165 | 3548 | <a href="#">NEOS13_2131</a>   | peg | 3548_21085_19811 | 21085 | 19811 | - | Poly(A) polymerase (EC 2.7.7.19)                                                                                        |                           |
| 2166 | 3548 | <a href="#">NEOS13_2132</a>   | peg | 3548_21435_22802 | 21435 | 22802 | + | Phosphoglucosamine mutase (EC<br>5.4.2.10)                                                                              |                           |
| 2167 | 3548 | <a href="#">NEOS13_2133</a>   | peg | 3548_22824_24653 | 22824 | 24653 | + | Glucosamine--fructose-6-phosphate<br>aminotransferase [isomerizing] (EC<br>2.6.1.16)                                    |                           |
| 2168 | 3548 | <a href="#">NEOS13_2134</a>   | peg | 3548_25024_25149 | 25024 | 25149 | + | hypothetical protein                                                                                                    |                           |
| 2169 | 3550 | <a href="#">NEOS13_2135</a>   | peg | 3550_48_470      | 48    | 470   | + | Mobile element protein                                                                                                  |                           |
| 2170 | 3550 | <a href="#">NEOS13_2136</a>   | peg | 3550_513_701     | 513   | 701   | + | hypothetical protein                                                                                                    |                           |

|      |      |                             |     |                  |       |       |   |                                                                                                |                           |
|------|------|-----------------------------|-----|------------------|-------|-------|---|------------------------------------------------------------------------------------------------|---------------------------|
| 2171 | 3550 | <a href="#">NEOS13_2137</a> | peg | 3550_834_2024    | 834   | 2024  | + | hypothetical protein                                                                           |                           |
| 2172 | 3550 | <a href="#">NEOS13_2138</a> | peg | 3550_2310_2065   | 2310  | 2065  | - | hypothetical protein                                                                           |                           |
| 2173 | 3550 | <a href="#">NEOS13_2139</a> | peg | 3550_2792_2394   | 2792  | 2394  | - | hypothetical protein                                                                           |                           |
| 2174 | 3550 | <a href="#">NEOS13_2140</a> | peg | 3550_3488_3610   | 3488  | 3610  | + | hypothetical protein                                                                           |                           |
| 2175 | 3550 | <a href="#">NEOS13_2141</a> | peg | 3550_3993_3631   | 3993  | 3631  | - | hypothetical protein                                                                           |                           |
| 2176 | 3550 | <a href="#">NEOS13_2142</a> | peg | 3550_5186_4257   | 5186  | 4257  | - | Signal recognition particle receptor protein FtsY (=alpha subunit) (TC 3.A.5.1.1)              | Sec_T2SS                  |
| 2177 | 3550 | <a href="#">NEOS13_2143</a> | peg | 3550_5723_5595   | 5723  | 5595  | - | hypothetical protein                                                                           |                           |
| 2178 | 3550 | <a href="#">NEOS13_2144</a> | peg | 3550_5868_7049   | 5868  | 7049  | + | hypothetical protein                                                                           |                           |
| 2179 | 3550 | <a href="#">NEOS13_2145</a> | peg | 3550_7164_7595   | 7164  | 7595  | + | hypothetical protein                                                                           |                           |
| 2180 | 3550 | <a href="#">NEOS13_2146</a> | peg | 3550_7903_8136   | 7903  | 8136  | + | hypothetical protein                                                                           |                           |
| 2181 | 3550 | <a href="#">NEOS13_2147</a> | peg | 3550_9607_8189   | 9607  | 8189  | - | HtrA protease/chaperone protein                                                                |                           |
| 2182 | 3550 | <a href="#">NEOS13_2148</a> | peg | 3550_11003_9618  | 11003 | 9618  | - | Catalyzes the cleavage of p-aminobenzoyl-glutamate to p-aminobenzoate and glutamate, subunit A |                           |
| 2183 | 3550 | <a href="#">NEOS13_2149</a> | peg | 3550_12426_11119 | 12426 | 11119 | - | Peptidase M48, Ste24p                                                                          |                           |
| 2184 | 3550 | <a href="#">NEOS13_2150</a> | peg | 3550_13876_13154 | 13876 | 13154 | - | hypothetical protein                                                                           |                           |
| 2185 | 3551 | <a href="#">NEOS13_2151</a> | peg | 3551_116_1510    | 116   | 1510  | + | Leucine-rich repeat containing protein                                                         | Leucine-rich repeat       |
| 2186 | 3552 | <a href="#">NEOS13_2152</a> | peg | 3552_1029_226    | 1029  | 226   | - | hypothetical protein                                                                           |                           |
| 2187 | 3552 | <a href="#">NEOS13_2153</a> | peg | 3552_1763_1032   | 1763  | 1032  | - | hypothetical protein                                                                           |                           |
| 2188 | 3552 | <a href="#">NEOS13_2154</a> | peg | 3552_1811_1924   | 1811  | 1924  | + | hypothetical protein                                                                           |                           |
| 2189 | 3552 | <a href="#">NEOS13_2155</a> | peg | 3552_3934_2570   | 3934  | 2570  | - | putative protoporphyrinogen oxidase                                                            |                           |
| 2190 | 3552 | <a href="#">NEOS13_2156</a> | peg | 3552_4968_3931   | 4968  | 3931  | - | Uroporphyrinogen III decarboxylase (EC 4.1.1.37)                                               |                           |
| 2191 | 3552 | <a href="#">NEOS13_2157</a> | peg | 3552_7016_4968   | 7016  | 4968  | - | Transketolase (EC 2.2.1.1)                                                                     | Pentose_phosphate_pathway |
| 2192 | 3552 | <a href="#">NEOS13_2158</a> | peg | 3552_7091_8050   | 7091  | 8050  | + | hypothetical protein                                                                           |                           |
| 2193 | 3552 | <a href="#">NEOS13_2159</a> | peg | 3552_8753_8235   | 8753  | 8235  | - | Mobile element protein                                                                         |                           |
| 2194 | 3553 | <a href="#">NEOS13_2160</a> | peg | 3553_819_253     | 819   | 253   | - | DNA polymerase III beta subunit (EC 2.7.7.7)                                                   |                           |
| 2195 | 3554 | <a href="#">NEOS13_2161</a> | peg | 3554_1030_227    | 1030  | 227   | - | Leucine-rich repeat containing protein                                                         | Leucine-rich repeat       |
| 2196 | 3556 | <a href="#">NEOS13_2162</a> | peg | 3556_74_415      | 74    | 415   | + | Transposase, IS4 family protein                                                                | Transposase               |
| 2197 | 3556 | <a href="#">NEOS13_2163</a> | peg | 3556_852_2048    | 852   | 2048  | + | Leucine-rich repeat containing protein                                                         | Leucine-rich repeat       |
| 2198 | 3556 | <a href="#">NEOS13_2164</a> | peg | 3556_2553_2756   | 2553  | 2756  | + | hypothetical protein                                                                           |                           |
| 2199 | 3556 | <a href="#">NEOS13_2165</a> | peg | 3556_2737_3009   | 2737  | 3009  | + | transposase, IS4 family                                                                        | Transposase               |
| 2200 | 3556 | <a href="#">NEOS13_2166</a> | peg | 3556_2972_3181   | 2972  | 3181  | + | hypothetical protein                                                                           |                           |
| 2201 | 3557 | <a href="#">NEOS13_2167</a> | peg | 3557_966_622     | 966   | 622   | - | Leucine-rich repeat containing protein                                                         | Leucine-rich repeat       |
| 2202 | 3558 | <a href="#">NEOS13_2168</a> | peg | 3558_576_463     | 576   | 463   | - | hypothetical protein                                                                           |                           |
| 2203 | 3558 | <a href="#">NEOS13_2169</a> | peg | 3558_1031_723    | 1031  | 723   | - | Leucine-rich repeat containing protein                                                         | Leucine-rich repeat       |
| 2204 | 3558 | <a href="#">NEOS13_2170</a> | peg | 3558_1221_1000   | 1221  | 1000  | - | hypothetical protein                                                                           |                           |
| 2205 | 3558 | <a href="#">NEOS13_2171</a> | peg | 3558_1267_1422   | 1267  | 1422  | + | hypothetical protein                                                                           |                           |
| 2206 | 3558 | <a href="#">NEOS13_2172</a> | peg | 3558_2254_1577   | 2254  | 1577  | - | Leucine-rich repeat containing protein                                                         | Leucine-rich repeat       |
| 2207 | 3559 | <a href="#">NEOS13_2173</a> | peg | 3559_121_447     | 121   | 447   | + | transposase, IS4 family                                                                        | Transposase               |
| 2208 | 3559 | <a href="#">NEOS13_2174</a> | peg | 3559_763_2454    | 763   | 2454  | + | Leucine-rich repeat containing protein                                                         | Leucine-rich repeat       |
| 2209 | 3560 | <a href="#">NEOS13_2175</a> | peg | 3560_58_576      | 58    | 576   | + | Mobile element protein                                                                         |                           |
| 2210 | 3561 | <a href="#">NEOS13_2176</a> | peg | 3561_1971_1852   | 1971  | 1852  | - | hypothetical protein                                                                           |                           |
| 2211 | 3562 | <a href="#">NEOS13_2177</a> | peg | 3562_1542_2003   | 1542  | 2003  | + | hypothetical protein                                                                           |                           |
| 2212 | 3562 | <a href="#">NEOS13_2178</a> | peg | 3562_2070_3389   | 2070  | 3389  | + | hypothetical protein                                                                           |                           |
| 2213 | 3562 | <a href="#">NEOS13_2179</a> | peg | 3562_3451_3597   | 3451  | 3597  | + | hypothetical protein                                                                           |                           |
| 2214 | 3562 | <a href="#">NEOS13_2180</a> | peg | 3562_3810_3691   | 3810  | 3691  | - | hypothetical protein                                                                           |                           |
| 2215 | 3562 | <a href="#">NEOS13_2181</a> | peg | 3562_3869_4069   | 3869  | 4069  | + | hypothetical protein                                                                           |                           |
| 2216 | 3562 | <a href="#">NEOS13_2182</a> | peg | 3562_4406_4266   | 4406  | 4266  | - | hypothetical protein                                                                           |                           |
| 2217 | 3562 | <a href="#">NEOS13_2183</a> | peg | 3562_4419_7067   | 4419  | 7067  | + | Alanyl-tRNA synthetase (EC 6.1.1.7)                                                            |                           |
| 2218 | 3562 | <a href="#">NEOS13_2184</a> | peg | 3562_7396_7617   | 7396  | 7617  | + | hypothetical protein                                                                           |                           |
| 2219 | 3562 | <a href="#">NEOS13_2185</a> | peg | 3562_8993_10906  | 8993  | 10906 | + | Transcription-repair coupling factor                                                           |                           |
| 2220 | 3562 | <a href="#">NEOS13_2186</a> | peg | 3562_11641_11036 | 11641 | 11036 | - | Holliday junction DNA helicase RuvA                                                            |                           |
| 2221 | 3562 | <a href="#">NEOS13_2187</a> | peg | 3562_12159_11662 | 12159 | 11662 | - | Crossover junction endodeoxyribonuclease RuvC (EC 3.1.22.4)                                    |                           |
| 2222 | 3562 | <a href="#">NEOS13_2188</a> | peg | 3562_14220_12169 | 14220 | 12169 | - | liver stage antigen, putative                                                                  |                           |
| 2223 | 3562 | <a href="#">NEOS13_2189</a> | peg | 3562_14340_15404 | 14340 | 15404 | + | ADP-heptose--lipooligosaccharide heptosyltransferase II (EC 2.4.1.-)                           |                           |
| 2224 | 3562 | <a href="#">NEOS13_2190</a> | peg | 3562_16065_17420 | 16065 | 17420 | + | N-acetylglucosamine-1-phosphate uridylyltransferase eukaryotic (EC 2.7.7.23)                   |                           |
| 2225 | 3562 | <a href="#">NEOS13_2191</a> | peg | 3562_17405_17551 | 17405 | 17551 | + | hypothetical protein                                                                           |                           |
| 2226 | 3562 | <a href="#">NEOS13_2192</a> | peg | 3562_17634_18632 | 17634 | 18632 | + | Glycerol-3-phosphate dehydrogenase [NAD(P)+] (EC 1.1.1.94)                                     |                           |
| 2227 | 3562 | <a href="#">NEOS13_2193</a> | peg | 3562_18683_20176 | 18683 | 20176 | + | NAD(P)HX epimerase / NAD(P)HX dehydratase                                                      |                           |
| 2228 | 3562 | <a href="#">NEOS13_2194</a> | peg | 3562_21798_20569 | 21798 | 20569 | - | Leucine-rich repeat containing protein                                                         | Leucine-rich repeat       |
| 2229 | 3562 | <a href="#">NEOS13_2195</a> | peg | 3562_21802_21993 | 21802 | 21993 | + | hypothetical protein                                                                           |                           |
| 2230 | 3562 | <a href="#">NEOS13_2196</a> | peg | 3562_22271_22591 | 22271 | 22591 | + | hypothetical protein                                                                           |                           |
| 2231 | 3562 | <a href="#">NEOS13_2197</a> | peg | 3562_22599_22745 | 22599 | 22745 | + | Mobile element protein                                                                         |                           |
| 2232 | 3562 | <a href="#">NEOS13_2198</a> | peg | 3562_22807_22962 | 22807 | 22962 | + | hypothetical protein                                                                           |                           |
| 2233 | 3562 | <a href="#">NEOS13_2199</a> | peg | 3562_23296_23171 | 23296 | 23171 | - | hypothetical protein                                                                           |                           |
| 2234 | 3562 | <a href="#">NEOS13_2200</a> | peg | 3562_24099_23563 | 24099 | 23563 | - | hypothetical protein                                                                           |                           |
| 2235 | 3562 | <a href="#">NEOS13_2201</a> | peg | 3562_26315_24096 | 26315 | 24096 | - | hypothetical protein                                                                           |                           |
| 2236 | 3562 | <a href="#">NEOS13_2202</a> | peg | 3562_26795_26325 | 26795 | 26325 | - | hypothetical protein                                                                           |                           |
| 2237 | 3562 | <a href="#">NEOS13_2203</a> | peg | 3562_27226_27032 | 27226 | 27032 | - | hypothetical protein                                                                           |                           |
| 2238 | 3562 | <a href="#">NEOS13_2204</a> | peg | 3562_27280_27432 | 27280 | 27432 | + | hypothetical protein                                                                           |                           |
| 2239 | 3562 | <a href="#">NEOS13_2205</a> | peg | 3562_27541_30714 | 27541 | 30714 | + | hypothetical protein                                                                           |                           |
| 2240 | 3562 | <a href="#">NEOS13_2206</a> | peg | 3562_33747_30772 | 33747 | 30772 | - | hypothetical protein                                                                           |                           |
| 2241 | 3562 | <a href="#">NEOS13_2207</a> | peg | 3562_34502_34320 | 34502 | 34320 | - | hypothetical protein                                                                           |                           |
| 2242 | 3562 | <a href="#">NEOS13_2208</a> | peg | 3562_34686_34567 | 34686 | 34567 | - | hypothetical protein                                                                           |                           |
| 2243 | 3562 | <a href="#">NEOS13_2209</a> | peg | 3562_34835_34716 | 34835 | 34716 | - | hypothetical protein                                                                           |                           |
| 2244 | 3562 | <a href="#">NEOS13_2210</a> | peg | 3562_35071_34853 | 35071 | 34853 | - | hypothetical protein                                                                           |                           |

|      |      |                                |     |                  |       |       |   |                                                                                    |                     |
|------|------|--------------------------------|-----|------------------|-------|-------|---|------------------------------------------------------------------------------------|---------------------|
| 2245 | 3562 | <a href="#">NEOS13_2211</a>    | peg | 3562_35223_37283 | 35223 | 37283 | + | hypothetical protein                                                               |                     |
| 2246 | 3562 | <a href="#">NEOS13_2212</a>    | peg | 3562_37360_38493 | 37360 | 38493 | + | hypothetical protein                                                               |                     |
| 2247 | 3562 | <a href="#">NEOS13_2213</a>    | peg | 3562_38562_40220 | 38562 | 40220 | + | hypothetical protein                                                               |                     |
| 2248 | 3562 | <a href="#">NEOS13_2214</a>    | peg | 3562_40213_42912 | 40213 | 42912 | + | WD-40 repeat protein                                                               |                     |
| 2249 | 3562 | <a href="#">NEOS13_2215</a>    | peg | 3562_43061_43255 | 43061 | 43255 | + | hypothetical protein                                                               |                     |
| 2250 | 3562 | <a href="#">NEOS13_2216</a>    | peg | 3562_43784_43590 | 43784 | 43590 | - | hypothetical protein                                                               |                     |
| 2251 | 3563 | <a href="#">NEOS13_2217</a>    | peg | 3563_780_352     | 780   | 352   | - | transposase, IS4 family protein                                                    | Transposase         |
| 2252 | 3563 | <a href="#">NEOS13_2218</a>    | peg | 3563_898_1134    | 898   | 1134  | + | hypothetical protein                                                               |                     |
| 2253 | 3563 | <a href="#">NEOS13_2219</a>    | peg | 3563_1392_1505   | 1392  | 1505  | + | hypothetical protein                                                               |                     |
| 2254 | 3563 | <a href="#">NEOS13_2220</a>    | peg | 3563_1506_1955   | 1506  | 1955  | + | putative rhs core protein with extension                                           |                     |
| 2255 | 3563 | <a href="#">NEOS13_2221</a>    | peg | 3563_2037_2519   | 2037  | 2519  | + | unknown protein                                                                    |                     |
| 2256 | 3563 | <a href="#">NEOS13_2222</a>    | peg | 3563_2778_2939   | 2778  | 2939  | + | hypothetical protein                                                               |                     |
| 2257 | 3563 | <a href="#">NEOS13_2223</a>    | peg | 3563_4004_2928   | 4004  | 2928  | - | hypothetical protein                                                               | ABC_transporter     |
| 2258 | 3563 | <a href="#">NEOS13_2224</a>    | peg | 3563_5152_4004   | 5152  | 4004  | - | hypothetical protein                                                               | ABC_transporter     |
| 2259 | 3563 | <a href="#">NEOS13_2225</a>    | peg | 3563_5441_5779   | 5441  | 5779  | + | hypothetical protein                                                               |                     |
| 2260 | 3563 | <a href="#">NEOS13_2226</a>    | peg | 3563_5784_7109   | 5784  | 7109  | + | tRNA(Ile)-lysine synthetase                                                        |                     |
| 2261 | 3563 | <a href="#">NEOS13_2227</a>    | peg | 3563_7503_10268  | 7503  | 10268 | + | Cell division protein FtsH (EC 3.4.24.-)                                           |                     |
| 2262 | 3563 | <a href="#">NEOS13_2228</a>    | peg | 3563_10289_10417 | 10289 | 10417 | + | hypothetical protein                                                               |                     |
| 2263 | 3563 | <a href="#">NEOS13_2229</a>    | peg | 3563_10494_11030 | 10494 | 11030 | + | Adenylate kinase (EC 2.7.4.3)                                                      |                     |
| 2264 | 3563 | <a href="#">NEOS13_2230</a>    | peg | 3563_11166_12044 | 11166 | 12044 | + | hypothetical protein                                                               |                     |
| 2265 | 3563 | <a href="#">NEOS13_2231</a>    | peg | 3563_14149_12908 | 14149 | 12908 | - | hypothetical protein                                                               |                     |
| 2266 | 3565 | <a href="#">NEOS13_2232</a>    | peg | 3565_196_1029    | 196   | 1029  | + | transposase, IS4                                                                   | Transposase         |
| 2267 | 3565 | <a href="#">NEOS13_2233</a>    | peg | 3565_1246_1362   | 1246  | 1362  | + | hypothetical protein                                                               |                     |
| 2268 | 3565 | <a href="#">NEOS13_2234</a>    | peg | 3565_3075_1630   | 3075  | 1630  | - | RND efflux system, outer membrane lipoprotein CmeC                                 |                     |
| 2269 | 3565 | <a href="#">NEOS13_2235</a>    | peg | 3565_6229_3068   | 6229  | 3068  | - | RND efflux system, inner membrane transporter CmeB                                 |                     |
| 2270 | 3565 | <a href="#">NEOS13_2236</a>    | peg | 3565_7411_6233   | 7411  | 6233  | - | hypothetical protein                                                               |                     |
| 2271 | 3565 | <a href="#">NEOS13_2237</a>    | peg | 3565_7563_8687   | 7563  | 8687  | + | Fatty acid desaturase (EC 1.14.19.1); Delta-9 fatty acid desaturase (EC 1.14.19.1) |                     |
| 2272 | 3565 | <a href="#">NEOS13_2238</a>    | peg | 3565_10186_8768  | 10186 | 8768  | - | hypothetical protein                                                               |                     |
| 2273 | 3565 | <a href="#">NEOS13_0035m a</a> | rna | 3565_10402_10472 | 10402 | 10472 | + | tRNA-Cys-GCA                                                                       | RNA                 |
| 2274 | 3565 | <a href="#">NEOS13_2239</a>    | peg | 3565_10555_11385 | 10555 | 11385 | + | rRNA small subunit methyltransferase I                                             |                     |
| 2275 | 3565 | <a href="#">NEOS13_2240</a>    | peg | 3565_11477_12754 | 11477 | 12754 | + | putative facilitator of salicylate uptake                                          |                     |
| 2276 | 3565 | <a href="#">NEOS13_2241</a>    | peg | 3565_15009_13318 | 15009 | 13318 | - | Leucine-rich repeat containing protein                                             | Leucine-rich repeat |
| 2277 | 3565 | <a href="#">NEOS13_2242</a>    | peg | 3565_15509_15673 | 15509 | 15673 | + | hypothetical protein                                                               |                     |
| 2278 | 3565 | <a href="#">NEOS13_2243</a>    | peg | 3565_15660_15797 | 15660 | 15797 | + | hypothetical protein                                                               |                     |
| 2279 | 3565 | <a href="#">NEOS13_2244</a>    | peg | 3565_16299_16526 | 16299 | 16526 | + | hypothetical protein                                                               |                     |
| 2280 | 3565 | <a href="#">NEOS13_2245</a>    | peg | 3565_16665_16856 | 16665 | 16856 | + | hypothetical protein                                                               |                     |
| 2281 | 3565 | <a href="#">NEOS13_2246</a>    | peg | 3565_17114_18715 | 17114 | 18715 | + | Heat shock protein 60 family chaperone GroEL                                       |                     |
| 2282 | 3565 | <a href="#">NEOS13_2247</a>    | peg | 3565_18825_20078 | 18825 | 20078 | + | hypothetical protein                                                               |                     |
| 2283 | 3565 | <a href="#">NEOS13_2248</a>    | peg | 3565_20095_21153 | 20095 | 21153 | + | Hemin ABC transporter, permease protein                                            | ABC_transporter     |
| 2284 | 3565 | <a href="#">NEOS13_2249</a>    | peg | 3565_21146_21856 | 21146 | 21856 | + | hypothetical protein                                                               |                     |
| 2285 | 3565 | <a href="#">NEOS13_2250</a>    | peg | 3565_22125_23918 | 22125 | 23918 | + | Phosphoglucomutase (EC 5.4.2.2)                                                    |                     |
| 2286 | 3565 | <a href="#">NEOS13_2251</a>    | peg | 3565_24042_25937 | 24042 | 25937 | + | Glutamine amidotransferase                                                         |                     |
| 2287 | 3565 | <a href="#">NEOS13_2252</a>    | peg | 3565_27388_26222 | 27388 | 26222 | - | Cold-shock DEAD-box protein A                                                      |                     |
| 2288 | 3565 | <a href="#">NEOS13_2253</a>    | peg | 3565_28194_27385 | 28194 | 27385 | - | hypothetical protein                                                               |                     |
| 2289 | 3565 | <a href="#">NEOS13_2254</a>    | peg | 3565_30343_28163 | 30343 | 28163 | - | Membrane protein containing HD superfamily hydrolase domain, YQFF ortholog         |                     |
| 2290 | 3565 | <a href="#">NEOS13_2255</a>    | peg | 3565_30719_31702 | 30719 | 31702 | + | UDP-glucose 4-epimerase (EC 5.1.3.2)                                               |                     |
| 2291 | 3565 | <a href="#">NEOS13_2256</a>    | peg | 3565_32210_32085 | 32210 | 32085 | - | hypothetical protein                                                               |                     |
| 2292 | 3565 | <a href="#">NEOS13_2257</a>    | peg | 3565_32220_33758 | 32220 | 33758 | + | DNA polymerase III subunits gamma and tau (EC 2.7.7.7)                             |                     |
| 2293 | 3565 | <a href="#">NEOS13_2258</a>    | peg | 3565_33767_34081 | 33767 | 34081 | + | conserved hypothetical protein 103                                                 |                     |
| 2294 | 3565 | <a href="#">NEOS13_2259</a>    | peg | 3565_36224_34464 | 36224 | 34464 | - | Phosphoenolpyruvate-protein phosphotransferase of PTS system (EC 2.7.3.9)          |                     |
| 2295 | 3565 | <a href="#">NEOS13_2260</a>    | peg | 3565_36457_36227 | 36457 | 36227 | - | Phosphocarrier protein of PTS system                                               |                     |
| 2296 | 3565 | <a href="#">NEOS13_2261</a>    | peg | 3565_37442_36465 | 37442 | 36465 | - | HPr kinase/phosphorylase (EC 2.7.1.-) (EC 2.7.4.-)                                 |                     |
| 2297 | 3565 | <a href="#">NEOS13_2262</a>    | peg | 3565_37582_37448 | 37582 | 37448 | - | hypothetical protein                                                               |                     |
| 2298 | 3565 | <a href="#">NEOS13_2263</a>    | peg | 3565_37931_37809 | 37931 | 37809 | - | hypothetical protein                                                               |                     |
| 2299 | 3565 | <a href="#">NEOS13_2264</a>    | peg | 3565_38079_37885 | 38079 | 37885 | - | hypothetical protein                                                               |                     |
| 2300 | 3565 | <a href="#">NEOS13_2265</a>    | peg | 3565_38396_39004 | 38396 | 39004 | + | hypothetical protein                                                               |                     |
| 2301 | 3565 | <a href="#">NEOS13_2266</a>    | peg | 3565_39144_40553 | 39144 | 40553 | + | Late competence protein ComEC, DNA transport                                       | Genetic_competence  |
| 2302 | 3565 | <a href="#">NEOS13_2267</a>    | peg | 3565_44647_40790 | 44647 | 40790 | - | hypothetical protein                                                               |                     |
| 2303 | 3565 | <a href="#">NEOS13_2268</a>    | peg | 3565_44834_44706 | 44834 | 44706 | - | hypothetical protein                                                               |                     |
| 2304 | 3565 | <a href="#">NEOS13_2269</a>    | peg | 3565_48539_45015 | 48539 | 45015 | - | hypothetical protein                                                               |                     |
| 2305 | 3565 | <a href="#">NEOS13_2270</a>    | peg | 3565_49396_49043 | 49396 | 49043 | - | hypothetical protein                                                               |                     |
| 2306 | 3565 | <a href="#">NEOS13_2271</a>    | peg | 3565_52604_49377 | 52604 | 49377 | - | hypothetical protein                                                               |                     |
| 2307 | 3565 | <a href="#">NEOS13_2272</a>    | peg | 3565_52879_53037 | 52879 | 53037 | + | hypothetical protein                                                               |                     |
| 2308 | 3565 | <a href="#">NEOS13_0036m a</a> | rna | 3565_53028_53101 | 53028 | 53101 | + | tRNA-His-GTG                                                                       | RNA                 |
| 2309 | 3565 | <a href="#">NEOS13_2273</a>    | peg | 3565_53127_53921 | 53127 | 53921 | + | Undecaprenyl-diphosphatase (EC 3.6.1.27)                                           |                     |
| 2310 | 3565 | <a href="#">NEOS13_2274</a>    | peg | 3565_53930_56437 | 53930 | 56437 | + | Cell division protein FtsK                                                         |                     |
| 2311 | 3565 | <a href="#">NEOS13_2275</a>    | peg | 3565_56935_56549 | 56935 | 56549 | - | hypothetical protein                                                               |                     |
| 2312 | 3565 | <a href="#">NEOS13_2276</a>    | peg | 3565_57105_57878 | 57105 | 57878 | + | metal dependent hydrolase, putative                                                |                     |
| 2313 | 3565 | <a href="#">NEOS13_2277</a>    | peg | 3565_58836_58045 | 58836 | 58045 | - | oxidoreductase, short chain dehydrogenase/reductase family                         |                     |
| 2314 | 3565 | <a href="#">NEOS13_2278</a>    | peg | 3565_59141_59257 | 59141 | 59257 | + | hypothetical protein                                                               |                     |
| 2315 | 3565 | <a href="#">NEOS13_2279</a>    | peg | 3565_59747_59595 | 59747 | 59595 | - | hypothetical protein                                                               |                     |



|      |      |                               |     |                  |       |       |   |                                                                        |                                                       |
|------|------|-------------------------------|-----|------------------|-------|-------|---|------------------------------------------------------------------------|-------------------------------------------------------|
| 2316 | 3565 | <a href="#">NEOS13_2280</a>   | peg | 3565_61096_60122 | 61096 | 60122 | - | hypothetical protein                                                   |                                                       |
| 2317 | 3565 | <a href="#">NEOS13_2281</a>   | peg | 3565_63154_61229 | 63154 | 61229 | - | hypothetical protein                                                   |                                                       |
| 2318 | 3565 | <a href="#">NEOS13_2282</a>   | peg | 3565_67566_63190 | 67566 | 63190 | - | hypothetical protein                                                   |                                                       |
| 2319 | 3565 | <a href="#">NEOS13_2283</a>   | peg | 3565_68125_67529 | 68125 | 67529 | - | hypothetical protein                                                   |                                                       |
| 2320 | 3565 | <a href="#">NEOS13_2284</a>   | peg | 3565_69036_68530 | 69036 | 68530 | - | hypothetical protein                                                   |                                                       |
| 2321 | 3565 | <a href="#">NEOS13_2285</a>   | peg | 3565_69253_69116 | 69253 | 69116 | - | hypothetical protein                                                   |                                                       |
| 2322 | 3565 | <a href="#">NEOS13_2286</a>   | peg | 3565_69504_69373 | 69504 | 69373 | - | hypothetical protein                                                   |                                                       |
| 2323 | 3565 | <a href="#">NEOS13_2287</a>   | peg | 3565_69735_70043 | 69735 | 70043 | + | hypothetical protein                                                   |                                                       |
| 2324 | 3566 | <a href="#">NEOS13_2288</a>   | peg | 3566_2915_1998   | 2915  | 1998  | - | Riboflavin kinase (EC 2.7.1.26) / FMN adenylyltransferase (EC 2.7.7.2) |                                                       |
| 2325 | 3566 | <a href="#">NEOS13_2289</a>   | peg | 3566_3035_2919   | 3035  | 2919  | - | hypothetical protein                                                   |                                                       |
| 2326 | 3566 | <a href="#">NEOS13_2290</a>   | peg | 3566_3907_3185   | 3907  | 3185  | - | tRNA pseudouridine synthase B (EC 4.2.1.70)                            |                                                       |
| 2327 | 3566 | <a href="#">NEOS13_2291</a>   | peg | 3566_4268_3900   | 4268  | 3900  | - | Ribosome-binding factor A                                              |                                                       |
| 2328 | 3566 | <a href="#">NEOS13_2292</a>   | peg | 3566_7062_4294   | 7062  | 4294  | - | Translation initiation factor 2                                        |                                                       |
| 2329 | 3566 | <a href="#">NEOS13_2293</a>   | peg | 3566_8341_7034   | 8341  | 7034  | - | Transcription termination protein NusA                                 |                                                       |
| 2330 | 3566 | <a href="#">NEOS13_2294</a>   | peg | 3566_10234_8492  | 10234 | 8492  | - | SSU ribosomal protein S1p                                              |                                                       |
| 2331 | 3566 | <a href="#">NEOS13_2295</a>   | peg | 3566_10847_10482 | 10847 | 10482 | - | Queuosine biosynthesis QueD, PTPS-I                                    |                                                       |
| 2332 | 3566 | <a href="#">NEOS13_2296</a>   | peg | 3566_10980_11750 | 10980 | 11750 | + | Aspartokinase (EC 2.7.2.4)                                             |                                                       |
| 2333 | 3566 | <a href="#">NEOS13_2297</a>   | peg | 3566_11779_13704 | 11779 | 13704 | + | unknown protein                                                        |                                                       |
| 2334 | 3566 | <a href="#">NEOS13_2298</a>   | peg | 3566_14042_14752 | 14042 | 14752 | + | Ribulose-phosphate 3-epimerase (EC 5.1.3.1)                            | Pentose_phosphate_pathway                             |
| 2335 | 3566 | <a href="#">NEOS13_2299</a>   | peg | 3566_15015_15572 | 15015 | 15572 | + | Translation elongation factor P-related protein                        |                                                       |
| 2336 | 3566 | <a href="#">NEOS13_2300</a>   | peg | 3566_15586_16077 | 15586 | 16077 | + | Biotin carboxyl carrier protein of acetyl-CoA carboxylase              | Fatty_acid_initiation_elongation                      |
| 2337 | 3566 | <a href="#">NEOS13_2301</a>   | peg | 3566_16087_17451 | 16087 | 17451 | + | Biotin carboxylase of acetyl-CoA carboxylase (EC 6.3.4.14)             | Fatty_acid_initiation_elongation                      |
| 2338 | 3566 | <a href="#">NEOS13_2302</a>   | peg | 3566_18055_23004 | 18055 | 23004 | + | hypothetical protein                                                   |                                                       |
| 2339 | 3566 | <a href="#">NEOS13_2303</a>   | peg | 3566_23493_23639 | 23493 | 23639 | + | Mobile element protein                                                 |                                                       |
| 2340 | 3566 | <a href="#">NEOS13_2304</a>   | peg | 3566_23851_24177 | 23851 | 24177 | + | ISSod13, transposase                                                   | Transposase                                           |
| 2341 | 3566 | <a href="#">NEOS13_2305</a>   | peg | 3566_24338_24679 | 24338 | 24679 | + | hypothetical protein                                                   |                                                       |
| 2342 | 3566 | <a href="#">NEOS13_2306</a>   | peg | 3566_26108_24687 | 26108 | 24687 | - | hypothetical protein                                                   |                                                       |
| 2343 | 3566 | <a href="#">NEOS13_2307</a>   | peg | 3566_27146_27649 | 27146 | 27649 | + | Transposase                                                            | Transposase                                           |
| 2344 | 3566 | <a href="#">NEOS13_2308</a>   | peg | 3566_28517_27834 | 28517 | 27834 | - | hypothetical protein                                                   |                                                       |
| 2345 | 3566 | <a href="#">NEOS13_2309</a>   | peg | 3566_29804_28884 | 29804 | 28884 | - | Epoxyqueuosine (oQ) reductase QueG                                     |                                                       |
| 2346 | 3566 | <a href="#">NEOS13_2310</a>   | peg | 3566_30733_29801 | 30733 | 29801 | - | Uncharacterized membrane protein Bsu2508 (YqfU)                        |                                                       |
| 2347 | 3566 | <a href="#">NEOS13_0037ma</a> | rna | 3566_30992_31064 | 30992 | 31064 | + | tRNA-Val-TAC                                                           | RNA                                                   |
| 2348 | 3566 | <a href="#">NEOS13_0038ma</a> | rna | 3566_31076_31149 | 31076 | 31149 | + | tRNA-Asp-GTC                                                           | RNA                                                   |
| 2349 | 3568 | <a href="#">NEOS13_2311</a>   | peg | 3568_714_190     | 714   | 190   | - | hypothetical protein                                                   |                                                       |
| 2350 | 3568 | <a href="#">NEOS13_2312</a>   | peg | 3568_1178_1065   | 1178  | 1065  | - | hypothetical protein                                                   |                                                       |
| 2351 | 3568 | <a href="#">NEOS13_2313</a>   | peg | 3568_1627_1496   | 1627  | 1496  | - | hypothetical protein                                                   |                                                       |
| 2352 | 3568 | <a href="#">NEOS13_2314</a>   | peg | 3568_2206_2730   | 2206  | 2730  | + | hypothetical protein                                                   |                                                       |
| 2353 | 3569 | <a href="#">NEOS13_2315</a>   | peg | 3569_35_4213     | 35    | 4213  | + | hypothetical protein                                                   |                                                       |
| 2354 | 3571 | <a href="#">NEOS13_2316</a>   | peg | 3571_79_999      | 79    | 999   | + | hypothetical protein                                                   |                                                       |
| 2355 | 3573 | <a href="#">NEOS13_2317</a>   | peg | 3573_2261_2413   | 2261  | 2413  | + | hypothetical protein                                                   |                                                       |
| 2356 | 3573 | <a href="#">NEOS13_2318</a>   | peg | 3573_2678_2415   | 2678  | 2415  | - | hypothetical protein                                                   |                                                       |
| 2357 | 3573 | <a href="#">NEOS13_2319</a>   | peg | 3573_3004_3264   | 3004  | 3264  | + | Mobile element protein                                                 |                                                       |
| 2358 | 3573 | <a href="#">NEOS13_2320</a>   | peg | 3573_4591_3590   | 4591  | 3590  | - | hypothetical protein                                                   |                                                       |
| 2359 | 3573 | <a href="#">NEOS13_2321</a>   | peg | 3573_5068_4751   | 5068  | 4751  | - | hypothetical protein                                                   |                                                       |
| 2360 | 3573 | <a href="#">NEOS13_2322</a>   | peg | 3573_5881_6381   | 5881  | 6381  | + | Mobile element protein                                                 |                                                       |
| 2361 | 3573 | <a href="#">NEOS13_2323</a>   | peg | 3573_6933_7355   | 6933  | 7355  | + | hypothetical protein                                                   |                                                       |
| 2362 | 3573 | <a href="#">NEOS13_2324</a>   | peg | 3573_7566_7441   | 7566  | 7441  | - | hypothetical protein                                                   |                                                       |
| 2363 | 3573 | <a href="#">NEOS13_2325</a>   | peg | 3573_7933_10458  | 7933  | 10458 | + | putative alanine racemase                                              |                                                       |
| 2364 | 3573 | <a href="#">NEOS13_2326</a>   | peg | 3573_11360_10455 | 11360 | 10455 | - | Cell division inhibitor                                                |                                                       |
| 2365 | 3573 | <a href="#">NEOS13_2327</a>   | peg | 3573_11963_11382 | 11963 | 11382 | - | PPO candidate 1                                                        |                                                       |
| 2366 | 3573 | <a href="#">NEOS13_2328</a>   | peg | 3573_13616_12189 | 13616 | 12189 | - | Deoxyribodipyrimidine photolyase (EC 4.1.99.3)                         |                                                       |
| 2367 | 3574 | <a href="#">NEOS13_2329</a>   | peg | 3574_165_995     | 165   | 995   | + | Mobile element protein                                                 |                                                       |
| 2368 | 3575 | <a href="#">NEOS13_2330</a>   | peg | 3575_165_995     | 165   | 995   | + | Mobile element protein                                                 |                                                       |
| 2369 | 3575 | <a href="#">NEOS13_2331</a>   | peg | 3575_992_1774    | 992   | 1774  | + | Mobile element protein                                                 |                                                       |
| 2370 | 3576 | <a href="#">NEOS13_2332</a>   | peg | 3576_1477_134    | 1477  | 134   | - | Mobile element protein                                                 |                                                       |
| 2371 | 3576 | <a href="#">NEOS13_2333</a>   | peg | 3576_1840_2526   | 1840  | 2526  | + | Uracil-DNA glycosylase, family 5                                       |                                                       |
| 2372 | 3576 | <a href="#">NEOS13_2334</a>   | peg | 3576_2527_2655   | 2527  | 2655  | + | hypothetical protein                                                   |                                                       |
| 2373 | 3576 | <a href="#">NEOS13_2335</a>   | peg | 3576_2994_5747   | 2994  | 5747  | + | Leucine-rich repeat containing protein                                 | Leucine-rich repeat                                   |
| 2374 | 3576 | <a href="#">NEOS13_2336</a>   | peg | 3576_6740_5856   | 6740  | 5856  | - | Dihydrodipicolinate synthase (EC 4.2.1.52)                             |                                                       |
| 2375 | 3576 | <a href="#">NEOS13_2337</a>   | peg | 3576_7512_6730   | 7512  | 6730  | - | Dihydrodipicolinate reductase (EC 1.3.1.26)                            |                                                       |
| 2376 | 3576 | <a href="#">NEOS13_2338</a>   | peg | 3576_8720_7671   | 8720  | 7671  | - | hypothetical protein                                                   |                                                       |
| 2377 | 3576 | <a href="#">NEOS13_2339</a>   | peg | 3576_10903_8720  | 10903 | 8720  | - | RecD-like DNA helicase YrrC                                            |                                                       |
| 2378 | 3576 | <a href="#">NEOS13_2340</a>   | peg | 3576_11209_11451 | 11209 | 11451 | + | hypothetical protein                                                   |                                                       |
| 2379 | 3576 | <a href="#">NEOS13_2341</a>   | peg | 3576_11818_12021 | 11818 | 12021 | + | hypothetical protein                                                   |                                                       |
| 2380 | 3576 | <a href="#">NEOS13_2342</a>   | peg | 3576_12520_14574 | 12520 | 14574 | + | hypothetical protein                                                   |                                                       |
| 2381 | 3576 | <a href="#">NEOS13_2343</a>   | peg | 3576_15593_14700 | 15593 | 14700 | - | Methionine aminopeptidase (EC 3.4.11.18)                               |                                                       |
| 2382 | 3576 | <a href="#">NEOS13_2344</a>   | peg | 3576_15810_16496 | 15810 | 16496 | + | tRNA (guanine46-N7)-methyltransferase (EC 2.1.1.33)                    |                                                       |
| 2383 | 3576 | <a href="#">NEOS13_2345</a>   | peg | 3576_16493_17539 | 16493 | 17539 | + | hypothetical protein                                                   |                                                       |
| 2384 | 3576 | <a href="#">NEOS13_2346</a>   | peg | 3576_17717_19336 | 17717 | 19336 | + | Glucose-6-phosphate isomerase (EC 5.3.1.9)                             | Glycolysis_Gluco-genesis<br>Pentose_phosphate_pathway |
| 2385 | 3576 | <a href="#">NEOS13_2347</a>   | peg | 3576_19355_19861 | 19355 | 19861 | + | hypothetical protein                                                   |                                                       |
| 2386 | 3576 | <a href="#">NEOS13_2348</a>   | peg | 3576_19839_20768 | 19839 | 20768 | + | probable XerD protein                                                  |                                                       |
| 2387 | 3576 | <a href="#">NEOS13_2349</a>   | peg | 3576_21316_20810 | 21316 | 20810 | - | type III secretion chaperone                                           |                                                       |
| 2388 | 3576 | <a href="#">NEOS13_2350</a>   | peg | 3576_21437_21841 | 21437 | 21841 | + | hypothetical protein                                                   |                                                       |

|      |      |                               |     |                  |       |       |   |                                                                                                                         |                     |
|------|------|-------------------------------|-----|------------------|-------|-------|---|-------------------------------------------------------------------------------------------------------------------------|---------------------|
| 2389 | 3576 | <a href="#">NEOS13_2351</a>   | peg | 3576_21953_21804 | 21953 | 21804 | - | hypothetical protein                                                                                                    |                     |
| 2390 | 3576 | <a href="#">NEOS13_2352</a>   | peg | 3576_23712_22252 | 23712 | 22252 | - | Aspartyl-tRNA(Asn) amidotransferase subunit B (EC 6.3.5.6) @ Glutamyl-tRNA(Gln) amidotransferase subunit B (EC 6.3.5.7) |                     |
| 2391 | 3576 | <a href="#">NEOS13_2353</a>   | peg | 3576_25180_23723 | 25180 | 23723 | - | Aspartyl-tRNA(Asn) amidotransferase subunit A (EC 6.3.5.6) @ Glutamyl-tRNA(Gln) amidotransferase subunit A (EC 6.3.5.7) |                     |
| 2392 | 3576 | <a href="#">NEOS13_2354</a>   | peg | 3576_25497_25198 | 25497 | 25198 | - | Aspartyl-tRNA(Asn) amidotransferase subunit C (EC 6.3.5.6) @ Glutamyl-tRNA(Gln) amidotransferase subunit C (EC 6.3.5.7) |                     |
| 2393 | 3576 | <a href="#">NEOS13_2355</a>   | peg | 3576_28465_26573 | 28465 | 26573 | - | hypothetical protein                                                                                                    |                     |
| 2394 | 3578 | <a href="#">NEOS13_2356</a>   | peg | 3578_165_49      | 165   | 49    | - | Mobile element protein                                                                                                  |                     |
| 2395 | 3578 | <a href="#">NEOS13_2357</a>   | peg | 3578_508_642     | 508   | 642   | + | hypothetical protein                                                                                                    |                     |
| 2396 | 3578 | <a href="#">NEOS13_2358</a>   | peg | 3578_697_921     | 697   | 921   | + | hypothetical protein                                                                                                    |                     |
| 2397 | 3581 | <a href="#">NEOS13_2359</a>   | peg | 3581_254_2635    | 254   | 2635  | + | hypothetical protein                                                                                                    |                     |
| 2398 | 3581 | <a href="#">NEOS13_2360</a>   | peg | 3581_2639_3190   | 2639  | 3190  | + | hypothetical protein                                                                                                    |                     |
| 2399 | 3581 | <a href="#">NEOS13_2361</a>   | peg | 3581_3245_3376   | 3245  | 3376  | + | hypothetical protein                                                                                                    |                     |
| 2400 | 3581 | <a href="#">NEOS13_2362</a>   | peg | 3581_4472_3813   | 4472  | 3813  | - | Queuosine Biosynthesis QueC ATPase                                                                                      |                     |
| 2401 | 3581 | <a href="#">NEOS13_2363</a>   | peg | 3581_5122_4475   | 5122  | 4475  | - | Queuosine Biosynthesis QueE Radical SAM                                                                                 |                     |
| 2402 | 3581 | <a href="#">NEOS13_2364</a>   | peg | 3581_5433_7274   | 5433  | 7274  | + | ankyrin repeat protein                                                                                                  | Ankyrin             |
| 2403 | 3581 | <a href="#">NEOS13_2365</a>   | peg | 3581_7342_7455   | 7342  | 7455  | + | hypothetical protein                                                                                                    |                     |
| 2404 | 3581 | <a href="#">NEOS13_2366</a>   | peg | 3581_7457_7570   | 7457  | 7570  | + | hypothetical protein                                                                                                    |                     |
| 2405 | 3581 | <a href="#">NEOS13_2367</a>   | peg | 3581_7663_8673   | 7663  | 8673  | + | Malate dehydrogenase (EC 1.1.1.37)                                                                                      | TCA                 |
| 2406 | 3581 | <a href="#">NEOS13_2368</a>   | peg | 3581_8932_9759   | 8932  | 9759  | + | hypothetical protein                                                                                                    |                     |
| 2407 | 3581 | <a href="#">NEOS13_2369</a>   | peg | 3581_10932_9916  | 10932 | 9916  | - | hypothetical protein                                                                                                    |                     |
| 2408 | 3581 | <a href="#">NEOS13_2370</a>   | peg | 3581_11149_11334 | 11149 | 11334 | + | hypothetical protein                                                                                                    |                     |
| 2409 | 3581 | <a href="#">NEOS13_2371</a>   | peg | 3581_11331_12137 | 11331 | 12137 | + | Metal-dependent hydrolases of the beta-lactamase superfamily I; PhnP protein                                            |                     |
| 2410 | 3581 | <a href="#">NEOS13_2372</a>   | peg | 3581_12149_13474 | 12149 | 13474 | + | GTP-binding protein HflX                                                                                                |                     |
| 2411 | 3581 | <a href="#">NEOS13_2373</a>   | peg | 3581_15242_13764 | 15242 | 13764 | - | Cytosol aminopeptidase PepA (EC 3.4.11.1)                                                                               |                     |
| 2412 | 3581 | <a href="#">NEOS13_2374</a>   | peg | 3581_15781_15263 | 15781 | 15263 | - | Single-stranded DNA-binding protein                                                                                     |                     |
| 2413 | 3581 | <a href="#">NEOS13_2375</a>   | peg | 3581_15993_15838 | 15993 | 15838 | - | hypothetical protein                                                                                                    |                     |
| 2414 | 3581 | <a href="#">NEOS13_2376</a>   | peg | 3581_16727_16206 | 16727 | 16206 | - | FIG00493912: hypothetical protein                                                                                       |                     |
| 2415 | 3581 | <a href="#">NEOS13_2377</a>   | peg | 3581_17239_19284 | 17239 | 19284 | + | Glycogen debranching enzyme (EC 3.2.1.-)                                                                                |                     |
| 2416 | 3581 | <a href="#">NEOS13_2378</a>   | peg | 3581_19944_19813 | 19944 | 19813 | - | hypothetical protein                                                                                                    |                     |
| 2417 | 3581 | <a href="#">NEOS13_2379</a>   | peg | 3581_20179_22455 | 20179 | 22455 | + | hypothetical protein                                                                                                    |                     |
| 2418 | 3581 | <a href="#">NEOS13_2380</a>   | peg | 3581_24404_22791 | 24404 | 22791 | - | DNA repair protein RecN                                                                                                 |                     |
| 2419 | 3581 | <a href="#">NEOS13_2381</a>   | peg | 3581_24506_24667 | 24506 | 24667 | + | hypothetical protein                                                                                                    |                     |
| 2420 | 3581 | <a href="#">NEOS13_2382</a>   | peg | 3581_25763_24849 | 25763 | 24849 | - | Ribonuclease HIII (EC 3.1.26.4)                                                                                         |                     |
| 2421 | 3581 | <a href="#">NEOS13_2383</a>   | peg | 3581_25865_26275 | 25865 | 26275 | + | FIG00899448: hypothetical protein                                                                                       |                     |
| 2422 | 3581 | <a href="#">NEOS13_2384</a>   | peg | 3581_26420_26304 | 26420 | 26304 | - | hypothetical protein                                                                                                    |                     |
| 2423 | 3581 | <a href="#">NEOS13_2385</a>   | peg | 3581_26566_27510 | 26566 | 27510 | + | FIG028593: membrane protein                                                                                             |                     |
| 2424 | 3581 | <a href="#">NEOS13_2386</a>   | peg | 3581_28381_27767 | 28381 | 27767 | - | tRNA pseudouridine synthase A (EC 4.2.1.70)                                                                             |                     |
| 2425 | 3581 | <a href="#">NEOS13_2387</a>   | peg | 3581_28513_28394 | 28513 | 28394 | - | hypothetical protein                                                                                                    |                     |
| 2426 | 3581 | <a href="#">NEOS13_2388</a>   | peg | 3581_29140_28541 | 29140 | 28541 | - | FIG00899512: hypothetical protein                                                                                       |                     |
| 2427 | 3581 | <a href="#">NEOS13_2389</a>   | peg | 3581_29750_29151 | 29750 | 29151 | - | FIG00899458: hypothetical protein                                                                                       |                     |
| 2428 | 3581 | <a href="#">NEOS13_2390</a>   | peg | 3581_31792_30371 | 31792 | 30371 | - | hypothetical protein                                                                                                    |                     |
| 2429 | 3581 | <a href="#">NEOS13_2391</a>   | peg | 3581_31921_32103 | 31921 | 32103 | + | hypothetical protein                                                                                                    |                     |
| 2430 | 3581 | <a href="#">NEOS13_2392</a>   | peg | 3581_33062_32181 | 33062 | 32181 | - | hypothetical protein                                                                                                    |                     |
| 2431 | 3581 | <a href="#">NEOS13_2393</a>   | peg | 3581_34499_33468 | 34499 | 33468 | - | hypothetical protein                                                                                                    |                     |
| 2432 | 3581 | <a href="#">NEOS13_2394</a>   | peg | 3581_35686_34526 | 35686 | 34526 | - | hypothetical protein                                                                                                    |                     |
| 2433 | 3581 | <a href="#">NEOS13_2395</a>   | peg | 3581_36252_35701 | 36252 | 35701 | - | hypothetical protein                                                                                                    |                     |
| 2434 | 3581 | <a href="#">NEOS13_2396</a>   | peg | 3581_36734_38092 | 36734 | 38092 | + | sodium:neurotransmitter symporter                                                                                       |                     |
| 2435 | 3581 | <a href="#">NEOS13_2397</a>   | peg | 3581_38102_39103 | 38102 | 39103 | + | Holliday junction DNA helicase RuvB                                                                                     |                     |
| 2436 | 3581 | <a href="#">NEOS13_2398</a>   | peg | 3581_39298_39086 | 39298 | 39086 | - | hypothetical protein                                                                                                    |                     |
| 2437 | 3581 | <a href="#">NEOS13_2399</a>   | peg | 3581_39273_39956 | 39273 | 39956 | + | hypothetical protein                                                                                                    |                     |
| 2438 | 3581 | <a href="#">NEOS13_2400</a>   | peg | 3581_40210_41247 | 40210 | 41247 | + | S-adenosylmethionine:tRNA ribosyltransferase-isomerase (EC 5.-.-.-)                                                     |                     |
| 2439 | 3581 | <a href="#">NEOS13_2401</a>   | peg | 3581_41787_43853 | 41787 | 43853 | + | hypothetical protein                                                                                                    |                     |
| 2440 | 3581 | <a href="#">NEOS13_2402</a>   | peg | 3581_43866_43991 | 43866 | 43991 | + | hypothetical protein                                                                                                    |                     |
| 2441 | 3581 | <a href="#">NEOS13_2403</a>   | peg | 3581_44188_45870 | 44188 | 45870 | + | Leucine-rich repeat containing protein                                                                                  | Leucine-rich repeat |
| 2442 | 3581 | <a href="#">NEOS13_2404</a>   | peg | 3581_46333_47862 | 46333 | 47862 | + | Thermostable carboxypeptidase 1 (EC 3.4.17.19)                                                                          |                     |
| 2443 | 3581 | <a href="#">NEOS13_2405</a>   | peg | 3581_48063_49529 | 48063 | 49529 | + | Leucine-rich repeat containing protein                                                                                  | Leucine-rich repeat |
| 2444 | 3581 | <a href="#">NEOS13_0039ma</a> | rna | 3581_49917_50003 | 49917 | 50003 | + | tRNA-Ser-TGA                                                                                                            | RNA                 |
| 2445 | 3581 | <a href="#">NEOS13_2406</a>   | peg | 3581_51389_50607 | 51389 | 50607 | - | hypothetical protein                                                                                                    |                     |
| 2446 | 3582 | <a href="#">NEOS13_2407</a>   | peg | 3582_254_2638    | 254   | 2638  | + | hypothetical protein                                                                                                    |                     |
| 2447 | 3582 | <a href="#">NEOS13_2408</a>   | peg | 3582_2651_3202   | 2651  | 3202  | + | unknown protein                                                                                                         |                     |
| 2448 | 3582 | <a href="#">NEOS13_2409</a>   | peg | 3582_3703_4185   | 3703  | 4185  | + | hypothetical protein                                                                                                    |                     |
| 2449 | 3582 | <a href="#">NEOS13_2410</a>   | peg | 3582_4235_4357   | 4235  | 4357  | + | hypothetical protein                                                                                                    |                     |
| 2450 | 3582 | <a href="#">NEOS13_2411</a>   | peg | 3582_4553_4368   | 4553  | 4368  | - | hypothetical protein                                                                                                    |                     |
| 2451 | 3582 | <a href="#">NEOS13_2412</a>   | peg | 3582_4629_4979   | 4629  | 4979  | + | hypothetical protein                                                                                                    |                     |
| 2452 | 3583 | <a href="#">NEOS13_2413</a>   | peg | 3583_658_374     | 658   | 374   | - | hypothetical protein                                                                                                    |                     |
| 2453 | 3583 | <a href="#">NEOS13_2414</a>   | peg | 3583_1410_1535   | 1410  | 1535  | + | hypothetical protein                                                                                                    |                     |
| 2454 | 3583 | <a href="#">NEOS13_2415</a>   | peg | 3583_1600_1743   | 1600  | 1743  | + | hypothetical protein                                                                                                    |                     |
| 2455 | 3583 | <a href="#">NEOS13_2416</a>   | peg | 3583_2758_2315   | 2758  | 2315  | - | hypothetical protein                                                                                                    |                     |
| 2456 | 3583 | <a href="#">NEOS13_2417</a>   | peg | 3583_3085_4104   | 3085  | 4104  | + | hypothetical protein                                                                                                    |                     |
| 2457 | 3583 | <a href="#">NEOS13_2418</a>   | peg | 3583_5688_4171   | 5688  | 4171  | - | general stress protein                                                                                                  |                     |

|      |      |                             |     |                  |       |       |   |                                                                                                                  |                           |
|------|------|-----------------------------|-----|------------------|-------|-------|---|------------------------------------------------------------------------------------------------------------------|---------------------------|
| 2458 | 3583 | <a href="#">NEOS13_2419</a> | peg | 3583_6289_6498   | 6289  | 6498  | + | hypothetical protein                                                                                             |                           |
| 2459 | 3583 | <a href="#">NEOS13_2420</a> | peg | 3583_7173_7688   | 7173  | 7688  | + | Ribonucleotide reductase transcriptional regulator NrdR                                                          |                           |
| 2460 | 3583 | <a href="#">NEOS13_2421</a> | peg | 3583_7716_8081   | 7716  | 8081  | + | DnaK Suppressor                                                                                                  |                           |
| 2461 | 3583 | <a href="#">NEOS13_2422</a> | peg | 3583_8084_8611   | 8084  | 8611  | + | Lipoprotein signal peptidase (EC 3.4.23.36)                                                                      |                           |
| 2462 | 3583 | <a href="#">NEOS13_2423</a> | peg | 3583_8621_9331   | 8621  | 9331  | + | hypothetical protein                                                                                             |                           |
| 2463 | 3583 | <a href="#">NEOS13_2424</a> | peg | 3583_9522_10370  | 9522  | 10370 | + | SAM dependent methyltransferase                                                                                  |                           |
| 2464 | 3583 | <a href="#">NEOS13_2425</a> | peg | 3583_10360_11184 | 10360 | 11184 | + | macromolecule metabolism; macromolecule synthesis, modification; rna synthesis, modification , dna transcription |                           |
| 2465 | 3583 | <a href="#">NEOS13_2426</a> | peg | 3583_11190_11849 | 11190 | 11849 | + | Similar to tRNA pseudouridine synthase C_group TruC1                                                             |                           |
| 2466 | 3583 | <a href="#">NEOS13_2427</a> | peg | 3583_13173_11947 | 13173 | 11947 | - | hypothetical protein                                                                                             |                           |
| 2467 | 3583 | <a href="#">NEOS13_2428</a> | peg | 3583_13669_14358 | 13669 | 14358 | + | hypothetical protein                                                                                             |                           |
| 2468 | 3583 | <a href="#">NEOS13_2429</a> | peg | 3583_15103_15702 | 15103 | 15702 | + | Phosphoheptose isomerase (EC 5.3.1.-)                                                                            |                           |
| 2469 | 3583 | <a href="#">NEOS13_2430</a> | peg | 3583_15748_16860 | 15748 | 16860 | + | Tetraacyldisaccharide 4'-kinase (EC 2.7.1.130)                                                                   |                           |
| 2470 | 3583 | <a href="#">NEOS13_2431</a> | peg | 3583_19399_17513 | 19399 | 17513 | - | Signal peptidase I (EC 3.4.21.89)                                                                                |                           |
| 2471 | 3583 | <a href="#">NEOS13_2432</a> | peg | 3583_19483_19671 | 19483 | 19671 | + | hypothetical protein                                                                                             |                           |
| 2472 | 3583 | <a href="#">NEOS13_2433</a> | peg | 3583_20533_19778 | 20533 | 19778 | - | hypothetical protein                                                                                             |                           |
| 2473 | 3583 | <a href="#">NEOS13_2434</a> | peg | 3583_20667_22169 | 20667 | 22169 | + | Nicotinate phosphoribosyltransferase (EC 2.4.2.11)                                                               |                           |
| 2474 | 3583 | <a href="#">NEOS13_2435</a> | peg | 3583_22173_22814 | 22173 | 22814 | + | Nicotinamidase (EC 3.5.1.19)                                                                                     |                           |
| 2475 | 3583 | <a href="#">NEOS13_2436</a> | peg | 3583_23209_23027 | 23209 | 23027 | - | hypothetical protein                                                                                             |                           |
| 2476 | 3583 | <a href="#">NEOS13_2437</a> | peg | 3583_23286_25370 | 23286 | 25370 | + | hypothetical protein                                                                                             |                           |
| 2477 | 3583 | <a href="#">NEOS13_2438</a> | peg | 3583_26053_27654 | 26053 | 27654 | + | Carboxypeptidase-related protein                                                                                 |                           |
| 2478 | 3583 | <a href="#">NEOS13_2439</a> | peg | 3583_27859_27719 | 27859 | 27719 | - | hypothetical protein                                                                                             |                           |
| 2479 | 3583 | <a href="#">NEOS13_2440</a> | peg | 3583_28188_27886 | 28188 | 27886 | - | Leucine-rich repeat containing protein                                                                           | Leucine-rich repeat       |
| 2480 | 3583 | <a href="#">NEOS13_2441</a> | peg | 3583_28208_28321 | 28208 | 28321 | + | hypothetical protein                                                                                             |                           |
| 2481 | 3583 | <a href="#">NEOS13_2442</a> | peg | 3583_30130_29057 | 30130 | 29057 | - | Leucine-rich repeat containing protein                                                                           | Leucine-rich repeat       |
| 2482 | 3584 | <a href="#">NEOS13_2443</a> | peg | 3584_714_28      | 714   | 28    | - | hypothetical protein                                                                                             |                           |
| 2483 | 3584 | <a href="#">NEOS13_2444</a> | peg | 3584_1802_759    | 1802  | 759   | - | hypothetical protein                                                                                             |                           |
| 2484 | 3584 | <a href="#">NEOS13_2445</a> | peg | 3584_3077_2016   | 3077  | 2016  | - | hypothetical protein                                                                                             |                           |
| 2485 | 3584 | <a href="#">NEOS13_2446</a> | peg | 3584_3343_3558   | 3343  | 3558  | + | Mobile element protein                                                                                           |                           |
| 2486 | 3584 | <a href="#">NEOS13_2447</a> | peg | 3584_3795_4106   | 3795  | 4106  | + | Mobile element protein                                                                                           |                           |
| 2487 | 3584 | <a href="#">NEOS13_2448</a> | peg | 3584_4110_4283   | 4110  | 4283  | + | hypothetical protein                                                                                             |                           |
| 2488 | 3584 | <a href="#">NEOS13_2449</a> | peg | 3584_4276_4482   | 4276  | 4482  | + | hypothetical protein                                                                                             |                           |
| 2489 | 3584 | <a href="#">NEOS13_2450</a> | peg | 3584_4708_5529   | 4708  | 5529  | + | hypothetical protein                                                                                             |                           |
| 2490 | 3584 | <a href="#">NEOS13_2451</a> | peg | 3584_5593_5796   | 5593  | 5796  | + | hypothetical protein                                                                                             |                           |
| 2491 | 3584 | <a href="#">NEOS13_2452</a> | peg | 3584_5813_6385   | 5813  | 6385  | + | hypothetical protein                                                                                             |                           |
| 2492 | 3584 | <a href="#">NEOS13_2453</a> | peg | 3584_6370_6531   | 6370  | 6531  | + | hypothetical protein                                                                                             |                           |
| 2493 | 3584 | <a href="#">NEOS13_2454</a> | peg | 3584_6588_7637   | 6588  | 7637  | + | hypothetical protein                                                                                             |                           |
| 2494 | 3584 | <a href="#">NEOS13_2455</a> | peg | 3584_7682_8368   | 7682  | 8368  | + | hypothetical protein                                                                                             |                           |
| 2495 | 3585 | <a href="#">NEOS13_2456</a> | peg | 3585_38_2110     | 38    | 2110  | + | hypothetical protein                                                                                             |                           |
| 2496 | 3585 | <a href="#">NEOS13_2457</a> | peg | 3585_2284_3534   | 2284  | 3534  | + | hypothetical protein                                                                                             |                           |
| 2497 | 3586 | <a href="#">NEOS13_2458</a> | peg | 3586_38_3577     | 38    | 3577  | + | hypothetical protein                                                                                             |                           |
| 2498 | 3586 | <a href="#">NEOS13_2459</a> | peg | 3586_4631_3720   | 4631  | 3720  | - | Probable protease htpX homolog (EC 3.4.24.-)                                                                     |                           |
| 2499 | 3586 | <a href="#">NEOS13_2460</a> | peg | 3586_6290_5298   | 6290  | 5298  | - | ROK family protein                                                                                               | Glycolysis_Gluconogenesis |
| 2500 | 3586 | <a href="#">NEOS13_2461</a> | peg | 3586_6527_7813   | 6527  | 7813  | + | 5-Enolpyruvylshikimate-3-phosphate synthase (EC 2.5.1.19)                                                        |                           |
| 2501 | 3586 | <a href="#">NEOS13_2462</a> | peg | 3586_7880_8407   | 7880  | 8407  | + | Shikimate kinase I (EC 2.7.1.71) # AroE I                                                                        |                           |
| 2502 | 3586 | <a href="#">NEOS13_2463</a> | peg | 3586_8412_9485   | 8412  | 9485  | + | Chorismate synthase (EC 4.2.3.5)                                                                                 |                           |
| 2503 | 3586 | <a href="#">NEOS13_2464</a> | peg | 3586_9482_10954  | 9482  | 10954 | + | shikimate 5-dehydrogenase( EC:1.1.1.25 )                                                                         |                           |
| 2504 | 3586 | <a href="#">NEOS13_2465</a> | peg | 3586_11114_12244 | 11114 | 12244 | + | Putrescine transport ATP-binding protein PotA (TC 3.A.1.11.1)                                                    | ABC_transporter           |
| 2505 | 3586 | <a href="#">NEOS13_2466</a> | peg | 3586_12246_13115 | 12246 | 13115 | + | Spermidine Putrescine ABC transporter permease component PotB (TC 3.A.1.11.1)                                    | ABC_transporter           |
| 2506 | 3586 | <a href="#">NEOS13_2467</a> | peg | 3586_13112_13876 | 13112 | 13876 | + | Spermidine Putrescine ABC transporter permease component potC (TC 3.A.1.11.1)                                    | ABC_transporter           |
| 2507 | 3586 | <a href="#">NEOS13_2468</a> | peg | 3586_13878_14915 | 13878 | 14915 | + | ABC transporter, periplasmic spermidine putrescine-binding protein PotD (TC 3.A.1.11.1)                          | ABC_transporter           |
| 2508 | 3586 | <a href="#">NEOS13_2469</a> | peg | 3586_15331_15083 | 15331 | 15083 | - | HicB protein                                                                                                     |                           |
| 2509 | 3586 | <a href="#">NEOS13_2470</a> | peg | 3586_15428_15550 | 15428 | 15550 | + | hypothetical protein                                                                                             |                           |
| 2510 | 3586 | <a href="#">NEOS13_2471</a> | peg | 3586_17600_15516 | 17600 | 15516 | - | hypothetical protein                                                                                             |                           |
| 2511 | 3586 | <a href="#">NEOS13_2472</a> | peg | 3586_19382_18198 | 19382 | 18198 | - | hypothetical protein                                                                                             |                           |
| 2512 | 3586 | <a href="#">NEOS13_2473</a> | peg | 3586_19679_19810 | 19679 | 19810 | + | hypothetical protein                                                                                             |                           |
| 2513 | 3586 | <a href="#">NEOS13_2474</a> | peg | 3586_20248_19832 | 20248 | 19832 | - | COG1720: Uncharacterized conserved protein                                                                       |                           |
| 2514 | 3586 | <a href="#">NEOS13_2475</a> | peg | 3586_20311_20886 | 20311 | 20886 | + | hypothetical protein                                                                                             |                           |
| 2515 | 3586 | <a href="#">NEOS13_2476</a> | peg | 3586_21076_22101 | 21076 | 22101 | + | DNA polymerase III delta subunit (EC 2.7.7.7)                                                                    |                           |
| 2516 | 3586 | <a href="#">NEOS13_2477</a> | peg | 3586_22113_22829 | 22113 | 22829 | + | SAM-dependent methyltransferase                                                                                  |                           |
| 2517 | 3586 | <a href="#">NEOS13_2478</a> | peg | 3586_23988_22843 | 23988 | 22843 | - | Hypothetical radical SAM family enzyme, NOT coproporphyrinogen III oxidase, oxygen-independent                   |                           |
| 2518 | 3586 | <a href="#">NEOS13_2479</a> | peg | 3586_24530_24039 | 24530 | 24039 | - | FIG00494315: hypothetical protein                                                                                |                           |
| 2519 | 3586 | <a href="#">NEOS13_2480</a> | peg | 3586_26729_24609 | 26729 | 24609 | - | hypothetical protein                                                                                             |                           |
| 2520 | 3586 | <a href="#">NEOS13_2481</a> | peg | 3586_26936_28135 | 26936 | 28135 | + | hypothetical protein                                                                                             |                           |
| 2521 | 3586 | <a href="#">NEOS13_2482</a> | peg | 3586_28411_29802 | 28411 | 29802 | + | hypothetical protein                                                                                             |                           |
| 2522 | 3586 | <a href="#">NEOS13_2483</a> | peg | 3586_32686_30083 | 32686 | 30083 | - | hypothetical protein                                                                                             |                           |

|      |      |                               |     |                  |       |       |   |                                                                                                                                            |                           |
|------|------|-------------------------------|-----|------------------|-------|-------|---|--------------------------------------------------------------------------------------------------------------------------------------------|---------------------------|
| 2523 | 3586 | <a href="#">NEOS13_2484</a>   | peg | 3586_33336_32686 | 33336 | 32686 | - | hypothetical protein                                                                                                                       |                           |
| 2524 | 3586 | <a href="#">NEOS13_2485</a>   | peg | 3586_34045_33734 | 34045 | 33734 | - | hypothetical protein                                                                                                                       |                           |
| 2525 | 3586 | <a href="#">NEOS13_2486</a>   | peg | 3586_34425_34709 | 34425 | 34709 | + | hypothetical protein                                                                                                                       |                           |
| 2526 | 3587 | <a href="#">NEOS13_2487</a>   | peg | 3587_119_391     | 119   | 391   | + | Transposase, IS4 family protein                                                                                                            | Transposase               |
| 2527 | 3587 | <a href="#">NEOS13_2488</a>   | peg | 3587_1809_601    | 1809  | 601   | - | hypothetical protein                                                                                                                       |                           |
| 2528 | 3587 | <a href="#">NEOS13_2489</a>   | peg | 3587_1854_1976   | 1854  | 1976  | + | hypothetical protein                                                                                                                       |                           |
| 2529 | 3587 | <a href="#">NEOS13_2490</a>   | peg | 3587_2141_5239   | 2141  | 5239  | + | hypothetical protein                                                                                                                       |                           |
| 2530 | 3587 | <a href="#">NEOS13_2491</a>   | peg | 3587_7231_5885   | 7231  | 5885  | - | Chromosomal replication initiator protein DnaA                                                                                             |                           |
| 2531 | 3587 | <a href="#">NEOS13_2492</a>   | peg | 3587_7401_7547   | 7401  | 7547  | + | hypothetical protein                                                                                                                       |                           |
| 2532 | 3587 | <a href="#">NEOS13_2493</a>   | peg | 3587_8207_9385   | 8207  | 9385  | + | Bacillosamine/Legionaminic acid biosynthesis aminotransferase PglE; 4-keto-6-deoxy-N-Acetyl-D-hexosaminyl-(Lipid carrier) aminotransferase |                           |
| 2533 | 3587 | <a href="#">NEOS13_2494</a>   | peg | 3587_9797_9402   | 9797  | 9402  | - | type III secretion chaperone, putative                                                                                                     |                           |
| 2534 | 3587 | <a href="#">NEOS13_2495</a>   | peg | 3587_10186_9800  | 10186 | 9800  | - | hypothetical protein                                                                                                                       |                           |
| 2535 | 3587 | <a href="#">NEOS13_2496</a>   | peg | 3587_10518_11450 | 10518 | 11450 | + | rRNA small subunit methyltransferase H                                                                                                     |                           |
| 2536 | 3587 | <a href="#">NEOS13_2497</a>   | peg | 3587_11447_11797 | 11447 | 11797 | + | hypothetical protein                                                                                                                       |                           |
| 2537 | 3587 | <a href="#">NEOS13_2498</a>   | peg | 3587_11854_13839 | 11854 | 13839 | + | Cell division protein FtsI [Peptidoglycan synthetase] (EC 2.4.1.129)                                                                       |                           |
| 2538 | 3587 | <a href="#">NEOS13_2499</a>   | peg | 3587_13878_15377 | 13878 | 15377 | + | UDP-N-acetylmuramoyl-L-alanine--2,6-diaminopimelate ligase (EC 6.3.2.13)                                                                   |                           |
| 2539 | 3587 | <a href="#">NEOS13_2500</a>   | peg | 3587_15382_16149 | 15382 | 16149 | + | N-acetylmuramoyl-L-alanine amidase (EC 3.5.1.28)                                                                                           |                           |
| 2540 | 3587 | <a href="#">NEOS13_0040ma</a> | rna | 3587_16271_16344 | 16271 | 16344 | + | tRNA-Arg-CCT                                                                                                                               | RNA                       |
| 2541 | 3587 | <a href="#">NEOS13_2501</a>   | peg | 3587_16432_17883 | 16432 | 17883 | + | 6-phosphogluconate dehydrogenase, decarboxylating (EC 1.1.1.44)                                                                            | Pentose_phosphate_pathway |
| 2542 | 3587 | <a href="#">NEOS13_2502</a>   | peg | 3587_19325_18441 | 19325 | 18441 | - | hypothetical protein                                                                                                                       |                           |
| 2543 | 3587 | <a href="#">NEOS13_2503</a>   | peg | 3587_20034_19444 | 20034 | 19444 | - | 1-acyl-sn-glycerol-3-phosphate acyltransferase (EC 2.3.1.51)                                                                               |                           |
| 2544 | 3587 | <a href="#">NEOS13_2504</a>   | peg | 3587_20582_20343 | 20582 | 20343 | - | hypothetical protein                                                                                                                       |                           |
| 2545 | 3588 | <a href="#">NEOS13_2505</a>   | peg | 3588_2110_284    | 2110  | 284   | - | Leucine-rich repeat containing protein                                                                                                     | Leucine-rich repeat       |
| 2546 | 3588 | <a href="#">NEOS13_2506</a>   | peg | 3588_3288_2698   | 3288  | 2698  | - | Leucine-rich repeat containing protein                                                                                                     | Leucine-rich repeat       |
| 2547 | 3588 | <a href="#">NEOS13_2507</a>   | peg | 3588_4644_3529   | 4644  | 3529  | - | Leucine-rich repeat containing protein                                                                                                     | Leucine-rich repeat       |
| 2548 | 3588 | <a href="#">NEOS13_2508</a>   | peg | 3588_6614_4923   | 6614  | 4923  | - | Leucine-rich repeat containing protein                                                                                                     | Leucine-rich repeat       |
| 2549 | 3588 | <a href="#">NEOS13_2509</a>   | peg | 3588_7519_6965   | 7519  | 6965  | - | Leucine-rich repeat containing protein                                                                                                     | Leucine-rich repeat       |
| 2550 | 3589 | <a href="#">NEOS13_2510</a>   | peg | 3589_516_388     | 516   | 388   | - | hypothetical protein                                                                                                                       |                           |
| 2551 | 3589 | <a href="#">NEOS13_2511</a>   | peg | 3589_882_1100    | 882   | 1100  | + | hypothetical protein                                                                                                                       |                           |
| 2552 | 3589 | <a href="#">NEOS13_2512</a>   | peg | 3589_1975_1397   | 1975  | 1397  | - | protein of unknown function DUF892                                                                                                         |                           |
| 2553 | 3589 | <a href="#">NEOS13_2513</a>   | peg | 3589_2319_2447   | 2319  | 2447  | + | hypothetical protein                                                                                                                       |                           |
| 2554 | 3589 | <a href="#">NEOS13_2514</a>   | peg | 3589_2673_3104   | 2673  | 3104  | + | hypothetical protein                                                                                                                       |                           |
| 2555 | 3589 | <a href="#">NEOS13_2515</a>   | peg | 3589_3712_4248   | 3712  | 4248  | + | hypothetical protein                                                                                                                       |                           |
| 2556 | 3589 | <a href="#">NEOS13_2516</a>   | peg | 3589_4445_4948   | 4445  | 4948  | + | hypothetical protein                                                                                                                       |                           |
| 2557 | 3589 | <a href="#">NEOS13_2517</a>   | peg | 3589_5028_5906   | 5028  | 5906  | + | Uncharacterized protein conserved in bacteria, NMA0228-like                                                                                |                           |
| 2558 | 3589 | <a href="#">NEOS13_2518</a>   | peg | 3589_5903_6802   | 5903  | 6802  | + | hypothetical protein                                                                                                                       |                           |
| 2559 | 3589 | <a href="#">NEOS13_2519</a>   | peg | 3589_6786_8027   | 6786  | 8027  | + | Ribosomal RNA small subunit methyltransferase B (EC 2.1.1.-)                                                                               |                           |
| 2560 | 3589 | <a href="#">NEOS13_2520</a>   | peg | 3589_8909_8244   | 8909  | 8244  | - | hypothetical protein                                                                                                                       |                           |
| 2561 | 3589 | <a href="#">NEOS13_2521</a>   | peg | 3589_9361_8918   | 9361  | 8918  | - | hypothetical protein                                                                                                                       |                           |
| 2562 | 3589 | <a href="#">NEOS13_2522</a>   | peg | 3589_14630_9621  | 14630 | 9621  | - | hypothetical protein                                                                                                                       |                           |
| 2563 | 3589 | <a href="#">NEOS13_2523</a>   | peg | 3589_14706_14828 | 14706 | 14828 | + | hypothetical protein                                                                                                                       |                           |
| 2564 | 3589 | <a href="#">NEOS13_2524</a>   | peg | 3589_15858_15244 | 15858 | 15244 | - | putative transcriptional regulator                                                                                                         |                           |
| 2565 | 3589 | <a href="#">NEOS13_2525</a>   | peg | 3589_16723_15908 | 16723 | 15908 | - | putative transcriptional regulator                                                                                                         |                           |
| 2566 | 3589 | <a href="#">NEOS13_2526</a>   | peg | 3589_16926_16723 | 16926 | 16723 | - | hypothetical protein                                                                                                                       |                           |
| 2567 | 3589 | <a href="#">NEOS13_2527</a>   | peg | 3589_17541_18368 | 17541 | 18368 | + | Mobile element protein                                                                                                                     |                           |
| 2568 | 3589 | <a href="#">NEOS13_2528</a>   | peg | 3589_20015_18852 | 20015 | 18852 | - | Leucine-rich repeat containing protein                                                                                                     | Leucine-rich repeat       |
| 2569 | 3589 | <a href="#">NEOS13_2529</a>   | peg | 3589_22190_20865 | 22190 | 20865 | - | Leucine-rich repeat containing protein                                                                                                     | Leucine-rich repeat       |
| 2570 | 3589 | <a href="#">NEOS13_2530</a>   | peg | 3589_24914_22665 | 24914 | 22665 | - | Leucine-rich repeat containing protein                                                                                                     | Leucine-rich repeat       |
| 2571 | 3589 | <a href="#">NEOS13_2531</a>   | peg | 3589_25255_25109 | 25255 | 25109 | - | hypothetical protein                                                                                                                       |                           |
| 2572 | 3589 | <a href="#">NEOS13_2532</a>   | peg | 3589_25453_25301 | 25453 | 25301 | - | hypothetical protein                                                                                                                       |                           |
| 2573 | 3589 | <a href="#">NEOS13_2533</a>   | peg | 3589_29171_25422 | 29171 | 25422 | - | hypothetical protein                                                                                                                       |                           |
| 2574 | 3589 | <a href="#">NEOS13_2534</a>   | peg | 3589_29364_29173 | 29364 | 29173 | - | hypothetical protein                                                                                                                       |                           |
| 2575 | 3589 | <a href="#">NEOS13_2535</a>   | peg | 3589_29874_29473 | 29874 | 29473 | - | conserved hypothetical protein, partial length                                                                                             |                           |
| 2576 | 3589 | <a href="#">NEOS13_2536</a>   | peg | 3589_30831_29875 | 30831 | 29875 | - | hypothetical protein                                                                                                                       |                           |
| 2577 | 3589 | <a href="#">NEOS13_2537</a>   | peg | 3589_33730_30809 | 33730 | 30809 | - | Type III secretion protein SetC                                                                                                            |                           |
| 2578 | 3589 | <a href="#">NEOS13_2538</a>   | peg | 3589_34247_34363 | 34247 | 34363 | + | hypothetical protein                                                                                                                       |                           |
| 2579 | 3589 | <a href="#">NEOS13_2539</a>   | peg | 3589_34781_34665 | 34781 | 34665 | - | Mobile element protein                                                                                                                     |                           |
| 2580 | 3589 | <a href="#">NEOS13_2540</a>   | peg | 3589_35124_35258 | 35124 | 35258 | + | hypothetical protein                                                                                                                       |                           |
| 2581 | 3589 | <a href="#">NEOS13_2541</a>   | peg | 3589_35313_35537 | 35313 | 35537 | + | hypothetical protein                                                                                                                       |                           |
| 2582 | 3590 | <a href="#">NEOS13_2542</a>   | peg | 3590_1317_574    | 1317  | 574   | - | Segregation and condensation protein B                                                                                                     |                           |
| 2583 | 3590 | <a href="#">NEOS13_2543</a>   | peg | 3590_2052_1324   | 2052  | 1324  | - | Segregation and condensation protein A                                                                                                     |                           |
| 2584 | 3590 | <a href="#">NEOS13_2544</a>   | peg | 3590_2280_4376   | 2280  | 4376  | + | Peptidase, S41 family                                                                                                                      |                           |
| 2585 | 3590 | <a href="#">NEOS13_0041ma</a> | rna | 3590_4442_4514   | 4442  | 4514  | + | tRNA-Phe-GAA                                                                                                                               | RNA                       |
| 2586 | 3590 | <a href="#">NEOS13_2545</a>   | peg | 3590_7593_5329   | 7593  | 5329  | - | hypothetical protein                                                                                                                       |                           |
| 2587 | 3590 | <a href="#">NEOS13_2546</a>   | peg | 3590_7786_7908   | 7786  | 7908  | + | hypothetical protein                                                                                                                       |                           |
| 2588 | 3590 | <a href="#">NEOS13_2547</a>   | peg | 3590_8081_8326   | 8081  | 8326  | + | 50S ribosomal protein L21                                                                                                                  |                           |
| 2589 | 3590 | <a href="#">NEOS13_2548</a>   | peg | 3590_8417_8590   | 8417  | 8590  | + | LSU ribosomal protein L27p                                                                                                                 |                           |
| 2590 | 3590 | <a href="#">NEOS13_2549</a>   | peg | 3590_8694_9695   | 8694  | 9695  | + | COG0536: GTP-binding protein Obg                                                                                                           |                           |
| 2591 | 3590 | <a href="#">NEOS13_2550</a>   | peg | 3590_10671_9811  | 10671 | 9811  | - | dTDP-4-dehydrohamnose reductase (EC 1.1.1.133)                                                                                             |                           |

|      |      |                               |     |                  |       |       |   |                                                                             |                     |
|------|------|-------------------------------|-----|------------------|-------|-------|---|-----------------------------------------------------------------------------|---------------------|
| 2592 | 3590 | <a href="#">NEOS13_2551</a>   | peg | 3590_11216_10668 | 11216 | 10668 | - | dTDP-4-dehydrohamnose 3,5-epimerase (EC 5.1.3.13)                           |                     |
| 2593 | 3590 | <a href="#">NEOS13_2552</a>   | peg | 3590_11901_13004 | 11901 | 13004 | + | Acetate kinase (EC 2.7.2.1)                                                 |                     |
| 2594 | 3590 | <a href="#">NEOS13_2553</a>   | peg | 3590_13309_13187 | 13309 | 13187 | - | hypothetical protein                                                        |                     |
| 2595 | 3590 | <a href="#">NEOS13_2554</a>   | peg | 3590_13451_13329 | 13451 | 13329 | - | hypothetical protein                                                        |                     |
| 2596 | 3590 | <a href="#">NEOS13_2555</a>   | peg | 3590_13652_15121 | 13652 | 15121 | + | Leucine-rich repeat containing protein                                      | Leucine-rich repeat |
| 2597 | 3590 | <a href="#">NEOS13_2556</a>   | peg | 3590_15276_15404 | 15276 | 15404 | + | hypothetical protein                                                        |                     |
| 2598 | 3590 | <a href="#">NEOS13_0042ma</a> | rna | 3590_15552_15639 | 15552 | 15639 | + | tRNA-Ser-GCT                                                                | RNA                 |
| 2599 | 3590 | <a href="#">NEOS13_2557</a>   | peg | 3590_16571_15696 | 16571 | 15696 | - | Zinc ABC transporter, inner membrane permease protein ZnuB                  | ABC_transporter     |
| 2600 | 3590 | <a href="#">NEOS13_2558</a>   | peg | 3590_17296_16568 | 17296 | 16568 | - | Zinc ABC transporter, ATP-binding protein ZnuC                              | ABC_transporter     |
| 2601 | 3590 | <a href="#">NEOS13_2559</a>   | peg | 3590_17765_17577 | 17765 | 17577 | - | hypothetical protein                                                        |                     |
| 2602 | 3590 | <a href="#">NEOS13_2560</a>   | peg | 3590_18696_17806 | 18696 | 17806 | - | Zinc ABC transporter, periplasmic-binding protein ZnuA                      | ABC_transporter     |
| 2603 | 3590 | <a href="#">NEOS13_0043ma</a> | rna | 3590_18930_19018 | 18930 | 19018 | + | tRNA-Ser-GGA                                                                | RNA                 |
| 2604 | 3590 | <a href="#">NEOS13_2561</a>   | peg | 3590_19322_19188 | 19322 | 19188 | - | hypothetical protein                                                        |                     |
| 2605 | 3590 | <a href="#">NEOS13_2562</a>   | peg | 3590_20081_19566 | 20081 | 19566 | - | hypothetical protein                                                        |                     |
| 2606 | 3590 | <a href="#">NEOS13_2563</a>   | peg | 3590_20761_20393 | 20761 | 20393 | - | hypothetical protein                                                        |                     |
| 2607 | 3590 | <a href="#">NEOS13_2564</a>   | peg | 3590_21881_20895 | 21881 | 20895 | - | hypothetical protein                                                        |                     |
| 2608 | 3590 | <a href="#">NEOS13_2565</a>   | peg | 3590_22321_22434 | 22321 | 22434 | + | hypothetical protein                                                        |                     |
| 2609 | 3590 | <a href="#">NEOS13_2566</a>   | peg | 3590_22586_23560 | 22586 | 23560 | + | Ribonucleotide reductase of class Ia (aerobic), beta subunit (EC 1.17.4.1)  |                     |
| 2610 | 3590 | <a href="#">NEOS13_2567</a>   | peg | 3590_23571_25889 | 23571 | 25889 | + | Ribonucleotide reductase of class Ia (aerobic), alpha subunit (EC 1.17.4.1) |                     |
| 2611 | 3590 | <a href="#">NEOS13_2568</a>   | peg | 3590_26400_27659 | 26400 | 27659 | + | Gamma-glutamyl phosphate reductase (EC 1.2.1.41)                            |                     |
| 2612 | 3590 | <a href="#">NEOS13_2569</a>   | peg | 3590_27864_29744 | 27864 | 29744 | + | hypothetical protein                                                        |                     |
| 2613 | 3590 | <a href="#">NEOS13_2570</a>   | peg | 3590_30145_31119 | 30145 | 31119 | + | hypothetical protein                                                        |                     |
| 2614 | 3590 | <a href="#">NEOS13_2571</a>   | peg | 3590_31129_31293 | 31129 | 31293 | + | hypothetical protein                                                        |                     |
| 2615 | 3590 | <a href="#">NEOS13_2572</a>   | peg | 3590_32000_31773 | 32000 | 31773 | - | hypothetical protein                                                        |                     |
| 2616 | 3590 | <a href="#">NEOS13_2573</a>   | peg | 3590_32390_32031 | 32390 | 32031 | - | hypothetical protein                                                        |                     |
| 2617 | 3590 | <a href="#">NEOS13_2574</a>   | peg | 3590_34039_33071 | 34039 | 33071 | - | putative 1-aminocyclopropane-1-carboxylate deaminase (ACC deaminase)        |                     |
| 2618 | 3590 | <a href="#">NEOS13_2575</a>   | peg | 3590_34206_34069 | 34206 | 34069 | - | hypothetical protein                                                        |                     |
| 2619 | 3590 | <a href="#">NEOS13_2576</a>   | peg | 3590_34284_34415 | 34284 | 34415 | + | hypothetical protein                                                        |                     |
| 2620 | 3590 | <a href="#">NEOS13_2577</a>   | peg | 3590_34498_35742 | 34498 | 35742 | + | NAD(FAD)-utilizing dehydrogenases                                           |                     |
| 2621 | 3590 | <a href="#">NEOS13_2578</a>   | peg | 3590_36678_35872 | 36678 | 35872 | - | Coproporphyrinogen III oxidase, aerobic (EC 1.3.3.3)                        |                     |
| 2622 | 3590 | <a href="#">NEOS13_2579</a>   | peg | 3590_36919_36728 | 36919 | 36728 | - | hypothetical protein                                                        |                     |
| 2623 | 3590 | <a href="#">NEOS13_2580</a>   | peg | 3590_36944_37063 | 36944 | 37063 | + | hypothetical protein                                                        |                     |
| 2624 | 3590 | <a href="#">NEOS13_2581</a>   | peg | 3590_38856_37303 | 38856 | 37303 | - | Leucine-rich repeat containing protein                                      | Leucine-rich repeat |
| 2625 | 3591 | <a href="#">NEOS13_2582</a>   | peg | 3591_1919_579    | 1919  | 579   | - | Leucine-rich repeat containing protein                                      | Leucine-rich repeat |
| 2626 | 3591 | <a href="#">NEOS13_2583</a>   | peg | 3591_2144_2028   | 2144  | 2028  | - | hypothetical protein                                                        |                     |
| 2627 | 3591 | <a href="#">NEOS13_2584</a>   | peg | 3591_2307_2176   | 2307  | 2176  | - | hypothetical protein                                                        |                     |
| 2628 | 3591 | <a href="#">NEOS13_2585</a>   | peg | 3591_2911_2795   | 2911  | 2795  | - | hypothetical protein                                                        |                     |
| 2629 | 3591 | <a href="#">NEOS13_2586</a>   | peg | 3591_3053_3208   | 3053  | 3208  | + | Mobile element protein                                                      |                     |
| 2630 | 3591 | <a href="#">NEOS13_2587</a>   | peg | 3591_3425_3285   | 3425  | 3285  | - | hypothetical protein                                                        |                     |
| 2631 | 3591 | <a href="#">NEOS13_2588</a>   | peg | 3591_5885_4089   | 5885  | 4089  | - | hypothetical protein                                                        |                     |
| 2632 | 3591 | <a href="#">NEOS13_2589</a>   | peg | 3591_6256_6417   | 6256  | 6417  | + | hypothetical protein                                                        |                     |
| 2633 | 3591 | <a href="#">NEOS13_2590</a>   | peg | 3591_6669_10091  | 6669  | 10091 | + | Exodeoxyribonuclease V gamma chain (EC 3.1.11.5)                            |                     |
| 2634 | 3591 | <a href="#">NEOS13_2591</a>   | peg | 3591_10251_11072 | 10251 | 11072 | + | hypothetical protein                                                        |                     |
| 2635 | 3591 | <a href="#">NEOS13_2592</a>   | peg | 3591_12211_15717 | 12211 | 15717 | + | Exodeoxyribonuclease V beta chain (EC 3.1.11.5)                             |                     |
| 2636 | 3591 | <a href="#">NEOS13_2593</a>   | peg | 3591_15774_17522 | 15774 | 17522 | + | Exodeoxyribonuclease V alpha chain (EC 3.1.11.5)                            |                     |
| 2637 | 3591 | <a href="#">NEOS13_2594</a>   | peg | 3591_18356_17967 | 18356 | 17967 | - | hypothetical protein                                                        |                     |
| 2638 | 3591 | <a href="#">NEOS13_2595</a>   | peg | 3591_19603_18434 | 19603 | 18434 | - | hypothetical protein                                                        |                     |
| 2639 | 3591 | <a href="#">NEOS13_2596</a>   | peg | 3591_20950_20465 | 20950 | 20465 | - | hypothetical protein                                                        |                     |
| 2640 | 3591 | <a href="#">NEOS13_2597</a>   | peg | 3591_21108_21245 | 21108 | 21245 | + | hypothetical protein                                                        |                     |
| 2641 | 3591 | <a href="#">NEOS13_2598</a>   | peg | 3591_21262_23427 | 21262 | 23427 | + | Transcription elongation factor GreA                                        |                     |
| 2642 | 3591 | <a href="#">NEOS13_2599</a>   | peg | 3591_23428_24036 | 23428 | 24036 | + | Nucleoside 5-triphosphatase RdgB (dHATP, dITP, XTP-specific) (EC 3.6.1.15)  |                     |
| 2643 | 3591 | <a href="#">NEOS13_2600</a>   | peg | 3591_24045_24740 | 24045 | 24740 | + | hypothetical protein                                                        |                     |
| 2644 | 3591 | <a href="#">NEOS13_2601</a>   | peg | 3591_24950_25933 | 24950 | 25933 | + | hypothetical protein                                                        |                     |
| 2645 | 3591 | <a href="#">NEOS13_0044ma</a> | rna | 3591_26078_26150 | 26078 | 26150 | + | tRNA-Ala-GGC                                                                | RNA                 |
| 2646 | 3591 | <a href="#">NEOS13_2602</a>   | peg | 3591_26230_26379 | 26230 | 26379 | + | hypothetical protein                                                        |                     |
| 2647 | 3591 | <a href="#">NEOS13_2603</a>   | peg | 3591_26854_26621 | 26854 | 26621 | - | hypothetical protein                                                        |                     |
| 2648 | 3591 | <a href="#">NEOS13_2604</a>   | peg | 3591_27723_26995 | 27723 | 26995 | - | hypothetical protein                                                        |                     |
| 2649 | 3591 | <a href="#">NEOS13_2605</a>   | peg | 3591_28517_27786 | 28517 | 27786 | - | hypothetical protein                                                        |                     |
| 2650 | 3591 | <a href="#">NEOS13_2606</a>   | peg | 3591_28517_28633 | 28517 | 28633 | + | hypothetical protein                                                        |                     |
| 2651 | 3591 | <a href="#">NEOS13_2607</a>   | peg | 3591_29877_28918 | 29877 | 28918 | - | hypothetical protein                                                        |                     |
| 2652 | 3591 | <a href="#">NEOS13_2608</a>   | peg | 3591_31738_30296 | 31738 | 30296 | - | hypothetical protein                                                        |                     |
| 2653 | 3591 | <a href="#">NEOS13_2609</a>   | peg | 3591_35567_32628 | 35567 | 32628 | - | hypothetical protein                                                        |                     |
| 2654 | 3591 | <a href="#">NEOS13_2610</a>   | peg | 3591_36586_35765 | 36586 | 35765 | - | hypothetical protein                                                        |                     |
| 2655 | 3591 | <a href="#">NEOS13_2611</a>   | peg | 3591_36909_38846 | 36909 | 38846 | + | Threonyl-tRNA synthetase (EC 6.1.1.3)                                       |                     |
| 2656 | 3591 | <a href="#">NEOS13_2612</a>   | peg | 3591_38834_39586 | 38834 | 39586 | + | Septum site-determining protein MinD                                        |                     |
| 2657 | 3591 | <a href="#">NEOS13_2613</a>   | peg | 3591_39723_40469 | 39723 | 40469 | + | Virulence plasmid protein pGP6-D                                            |                     |
| 2658 | 3591 | <a href="#">NEOS13_2614</a>   | peg | 3591_41058_40942 | 41058 | 40942 | - | hypothetical protein                                                        |                     |
| 2659 | 3591 | <a href="#">NEOS13_2615</a>   | peg | 3591_41106_41252 | 41106 | 41252 | + | hypothetical protein                                                        |                     |
| 2660 | 3591 | <a href="#">NEOS13_2616</a>   | peg | 3591_41381_42088 | 41381 | 42088 | + | hypothetical protein                                                        |                     |
| 2661 | 3591 | <a href="#">NEOS13_2617</a>   | peg | 3591_42070_43437 | 42070 | 43437 | + | Leucine-rich repeat containing protein                                      | Leucine-rich repeat |



|      |      |                               |     |                  |       |       |   |                                                               |                           |
|------|------|-------------------------------|-----|------------------|-------|-------|---|---------------------------------------------------------------|---------------------------|
| 2662 | 3591 | <a href="#">NEOS13_2618</a>   | peg | 3591_43972_43844 | 43972 | 43844 | - | hypothetical protein                                          |                           |
| 2663 | 3591 | <a href="#">NEOS13_2619</a>   | peg | 3591_43982_45325 | 43982 | 45325 | + | Leucine-rich repeat containing protein                        | Leucine-rich repeat       |
| 2664 | 3592 | <a href="#">NEOS13_2620</a>   | peg | 3592_751_137     | 751   | 137   | - | hypothetical protein                                          |                           |
| 2665 | 3592 | <a href="#">NEOS13_2621</a>   | peg | 3592_1029_1286   | 1029  | 1286  | + | hypothetical protein                                          |                           |
| 2666 | 3592 | <a href="#">NEOS13_2622</a>   | peg | 3592_1675_1490   | 1675  | 1490  | - | hypothetical protein                                          |                           |
| 2667 | 3592 | <a href="#">NEOS13_2623</a>   | peg | 3592_2441_2142   | 2441  | 2142  | - | hypothetical protein                                          |                           |
| 2668 | 3592 | <a href="#">NEOS13_2624</a>   | peg | 3592_2935_3129   | 2935  | 3129  | + | hypothetical protein                                          |                           |
| 2669 | 3592 | <a href="#">NEOS13_2625</a>   | peg | 3592_4358_3231   | 4358  | 3231  | - | Branched-chain amino acid transport system carrier protein    |                           |
| 2670 | 3592 | <a href="#">NEOS13_2626</a>   | peg | 3592_6196_5012   | 6196  | 5012  | - | L,L-diaminopimelate aminotransferase (EC 2.6.1.83)            |                           |
| 2671 | 3592 | <a href="#">NEOS13_2627</a>   | peg | 3592_7277_6201   | 7277  | 6201  | - | Aspartate-semialdehyde dehydrogenase (EC 1.2.1.11)            |                           |
| 2672 | 3592 | <a href="#">NEOS13_2628</a>   | peg | 3592_7613_7735   | 7613  | 7735  | + | hypothetical protein                                          |                           |
| 2673 | 3592 | <a href="#">NEOS13_2629</a>   | peg | 3592_8162_9409   | 8162  | 9409  | + | putative oxidoreductase iron/ascorbatefamily protein          |                           |
| 2674 | 3592 | <a href="#">NEOS13_2630</a>   | peg | 3592_11752_9632  | 11752 | 9632  | - | FIG00494344: hypothetical protein                             |                           |
| 2675 | 3592 | <a href="#">NEOS13_2631</a>   | peg | 3592_12298_13173 | 12298 | 13173 | + | FIG00493905: hypothetical protein                             |                           |
| 2676 | 3592 | <a href="#">NEOS13_2632</a>   | peg | 3592_13185_13523 | 13185 | 13523 | + | HIT family protein                                            |                           |
| 2677 | 3592 | <a href="#">NEOS13_2633</a>   | peg | 3592_14073_15809 | 14073 | 15809 | + | hypothetical protein                                          |                           |
| 2678 | 3592 | <a href="#">NEOS13_2634</a>   | peg | 3592_15916_17556 | 15916 | 17556 | + | hypothetical protein                                          |                           |
| 2679 | 3592 | <a href="#">NEOS13_2635</a>   | peg | 3592_18092_17823 | 18092 | 17823 | - | Thioredoxin                                                   |                           |
| 2680 | 3592 | <a href="#">NEOS13_2636</a>   | peg | 3592_19038_18925 | 19038 | 18925 | - | hypothetical protein                                          |                           |
| 2681 | 3592 | <a href="#">NEOS13_2637</a>   | peg | 3592_19675_21135 | 19675 | 21135 | + | hypothetical protein                                          |                           |
| 2682 | 3592 | <a href="#">NEOS13_2638</a>   | peg | 3592_21397_21254 | 21397 | 21254 | - | hypothetical protein                                          |                           |
| 2683 | 3592 | <a href="#">NEOS13_2639</a>   | peg | 3592_21854_23854 | 21854 | 23854 | + | hypothetical protein                                          |                           |
| 2684 | 3592 | <a href="#">NEOS13_2640</a>   | peg | 3592_25311_23851 | 25311 | 23851 | - | hypothetical protein                                          |                           |
| 2685 | 3592 | <a href="#">NEOS13_2641</a>   | peg | 3592_26175_25945 | 26175 | 25945 | - | hypothetical protein                                          |                           |
| 2686 | 3592 | <a href="#">NEOS13_2642</a>   | peg | 3592_26896_26354 | 26896 | 26354 | - | putative ATP-binding cassette protein, nasD                   |                           |
| 2687 | 3592 | <a href="#">NEOS13_2643</a>   | peg | 3592_27449_28717 | 27449 | 28717 | + | Tyrosine-specific transport protein                           |                           |
| 2688 | 3592 | <a href="#">NEOS13_2644</a>   | peg | 3592_28729_29217 | 28729 | 29217 | + | hypothetical protein                                          |                           |
| 2689 | 3592 | <a href="#">NEOS13_2645</a>   | peg | 3592_29268_31091 | 29268 | 31091 | + | DnaK-related protein                                          |                           |
| 2690 | 3592 | <a href="#">NEOS13_2646</a>   | peg | 3592_31185_31298 | 31185 | 31298 | + | hypothetical protein                                          |                           |
| 2691 | 3592 | <a href="#">NEOS13_2647</a>   | peg | 3592_31751_31326 | 31751 | 31326 | - | Sulfur acceptor protein SufE for iron-sulfur cluster assembly |                           |
| 2692 | 3592 | <a href="#">NEOS13_2648</a>   | peg | 3592_32520_32738 | 32520 | 32738 | + | Translation initiation factor I                               |                           |
| 2693 | 3592 | <a href="#">NEOS13_0045ma</a> | rna | 3592_32826_32897 | 32826 | 32897 | + | tRNA-Thr-GGT                                                  | RNA                       |
| 2694 | 3592 | <a href="#">NEOS13_2649</a>   | peg | 3592_33350_34159 | 33350 | 34159 | + | Translation elongation factor Tu                              |                           |
| 2695 | 3592 | <a href="#">NEOS13_0046ma</a> | rna | 3592_34230_34302 | 34230 | 34302 | + | tRNA-Trp-CCA                                                  | RNA                       |
| 2696 | 3592 | <a href="#">NEOS13_2650</a>   | peg | 3592_34343_34636 | 34343 | 34636 | + | putative preprotein translocase SecE                          |                           |
| 2697 | 3592 | <a href="#">NEOS13_2651</a>   | peg | 3592_34658_35206 | 34658 | 35206 | + | Transcription antitermination protein NusG                    |                           |
| 2698 | 3592 | <a href="#">NEOS13_2652</a>   | peg | 3592_35368_35796 | 35368 | 35796 | + | LSU ribosomal protein L11p (L12e)                             |                           |
| 2699 | 3592 | <a href="#">NEOS13_2653</a>   | peg | 3592_35818_36516 | 35818 | 36516 | + | LSU ribosomal protein L1p (L10Ae)                             |                           |
| 2700 | 3592 | <a href="#">NEOS13_2654</a>   | peg | 3592_36529_37056 | 36529 | 37056 | + | LSU ribosomal protein L10p (P0)                               |                           |
| 2701 | 3592 | <a href="#">NEOS13_2655</a>   | peg | 3592_37098_37481 | 37098 | 37481 | + | LSU ribosomal protein L7/L12 (P1/P2)                          |                           |
| 2702 | 3592 | <a href="#">NEOS13_2656</a>   | peg | 3592_38082_41504 | 38082 | 41504 | + | DNA-directed RNA polymerase beta subunit (EC 2.7.7.6)         |                           |
| 2703 | 3592 | <a href="#">NEOS13_2657</a>   | peg | 3592_41526_45725 | 41526 | 45725 | + | DNA-directed RNA polymerase beta' subunit (EC 2.7.7.6)        |                           |
| 2704 | 3592 | <a href="#">NEOS13_2658</a>   | peg | 3592_47389_46418 | 47389 | 46418 | - | Transaldolase (EC 2.2.1.2)                                    | Pentose_phosphate_pathway |
| 2705 | 3592 | <a href="#">NEOS13_2659</a>   | peg | 3592_47768_47382 | 47768 | 47382 | - | hypothetical protein                                          |                           |
| 2706 | 3592 | <a href="#">NEOS13_2660</a>   | peg | 3592_48350_48192 | 48350 | 48192 | - | hypothetical protein                                          |                           |
| 2707 | 3592 | <a href="#">NEOS13_2661</a>   | peg | 3592_48591_48478 | 48591 | 48478 | - | hypothetical protein                                          |                           |
| 2708 | 3592 | <a href="#">NEOS13_2662</a>   | peg | 3592_48698_48558 | 48698 | 48558 | - | hypothetical protein                                          |                           |
| 2709 | 3592 | <a href="#">NEOS13_2663</a>   | peg | 3592_49326_48823 | 49326 | 48823 | - | hypothetical protein                                          |                           |
| 2710 | 3592 | <a href="#">NEOS13_2664</a>   | peg | 3592_49574_49338 | 49574 | 49338 | - | hypothetical protein                                          |                           |
| 2711 | 3592 | <a href="#">NEOS13_2665</a>   | peg | 3592_50251_49775 | 50251 | 49775 | - | hypothetical protein                                          |                           |
| 2712 | 3592 | <a href="#">NEOS13_2666</a>   | peg | 3592_50454_50606 | 50454 | 50606 | + | hypothetical protein                                          |                           |
| 2713 | 3592 | <a href="#">NEOS13_2667</a>   | peg | 3592_50793_51419 | 50793 | 51419 | + | V-type ATP synthase subunit E (EC 3.6.3.14)                   | Oxidative_Phosphorylation |
| 2714 | 3592 | <a href="#">NEOS13_2668</a>   | peg | 3592_51425_52210 | 51425 | 52210 | + | hypothetical protein                                          |                           |
| 2715 | 3592 | <a href="#">NEOS13_2669</a>   | peg | 3592_52207_53991 | 52207 | 53991 | + | V-type ATP synthase subunit A (EC 3.6.3.14)                   | Oxidative_Phosphorylation |
| 2716 | 3592 | <a href="#">NEOS13_2670</a>   | peg | 3592_54005_55324 | 54005 | 55324 | + | V-type ATP synthase subunit B (EC 3.6.3.14)                   | Oxidative_Phosphorylation |
| 2717 | 3592 | <a href="#">NEOS13_2671</a>   | peg | 3592_55495_56142 | 55495 | 56142 | + | V-type ATP synthase subunit D (EC 3.6.3.14)                   | Oxidative_Phosphorylation |
| 2718 | 3592 | <a href="#">NEOS13_2672</a>   | peg | 3592_56139_58064 | 56139 | 58064 | + | V-type ATP synthase subunit I (EC 3.6.3.14)                   | Oxidative_Phosphorylation |
| 2719 | 3592 | <a href="#">NEOS13_2673</a>   | peg | 3592_58095_58517 | 58095 | 58517 | + | V-type ATP synthase subunit K (EC 3.6.3.14)                   | Oxidative_Phosphorylation |
| 2720 | 3592 | <a href="#">NEOS13_2674</a>   | peg | 3592_58905_59030 | 58905 | 59030 | + | hypothetical protein                                          |                           |
| 2721 | 3592 | <a href="#">NEOS13_2675</a>   | peg | 3592_59355_60584 | 59355 | 60584 | + | hypothetical protein                                          |                           |
| 2722 | 3592 | <a href="#">NEOS13_2676</a>   | peg | 3592_61029_61319 | 61029 | 61319 | + | hypothetical protein                                          |                           |
| 2723 | 3592 | <a href="#">NEOS13_2677</a>   | peg | 3592_61678_61559 | 61678 | 61559 | - | hypothetical protein                                          |                           |
| 2724 | 3592 | <a href="#">NEOS13_2678</a>   | peg | 3592_63568_62096 | 63568 | 62096 | - | Sodium-dependent transporter                                  |                           |
| 2725 | 3592 | <a href="#">NEOS13_2679</a>   | peg | 3592_64007_63846 | 64007 | 63846 | - | hypothetical protein                                          |                           |
| 2726 | 3592 | <a href="#">NEOS13_2680</a>   | peg | 3592_64060_64698 | 64060 | 64698 | + | hypothetical protein                                          |                           |
| 2727 | 3592 | <a href="#">NEOS13_2681</a>   | peg | 3592_65021_65134 | 65021 | 65134 | + | hypothetical protein                                          |                           |
| 2728 | 3592 | <a href="#">NEOS13_0047ma</a> | rna | 3592_65248_65162 | 65248 | 65162 | - | tRNA-Ser-CGA                                                  | RNA                       |
| 2729 | 3592 | <a href="#">NEOS13_2682</a>   | peg | 3592_65395_65832 | 65395 | 65832 | + | Mobile element protein                                        |                           |
| 2730 | 3592 | <a href="#">NEOS13_2683</a>   | peg | 3592_66497_66610 | 66497 | 66610 | + | hypothetical protein                                          |                           |
| 2731 | 3592 | <a href="#">NEOS13_2684</a>   | peg | 3592_66649_66861 | 66649 | 66861 | + | hypothetical protein                                          |                           |

|      |      |                             |     |                  |       |       |   |                                                                                                                      |                           |
|------|------|-----------------------------|-----|------------------|-------|-------|---|----------------------------------------------------------------------------------------------------------------------|---------------------------|
| 2732 | 3592 | <a href="#">NEOS13_2685</a> | peg | 3592_66864_67373 | 66864 | 67373 | + | Protein yciF                                                                                                         |                           |
| 2733 | 3592 | <a href="#">NEOS13_2686</a> | peg | 3592_67886_68458 | 67886 | 68458 | + | ATP-dependent DNA ligase (EC 6.5.1.1) clustered with Ku protein, LigD                                                |                           |
| 2734 | 3592 | <a href="#">NEOS13_2687</a> | peg | 3592_69100_68960 | 69100 | 68960 | - | hypothetical protein                                                                                                 |                           |
| 2735 | 3592 | <a href="#">NEOS13_2688</a> | peg | 3592_70337_70546 | 70337 | 70546 | + | hypothetical protein                                                                                                 |                           |
| 2736 | 3593 | <a href="#">NEOS13_2689</a> | peg | 3593_22_225      | 22    | 225   | + | hypothetical protein                                                                                                 |                           |
| 2737 | 3593 | <a href="#">NEOS13_2690</a> | peg | 3593_719_925     | 719   | 925   | + | hypothetical protein                                                                                                 |                           |
| 2738 | 3593 | <a href="#">NEOS13_2691</a> | peg | 3593_1071_1445   | 1071  | 1445  | + | hypothetical protein                                                                                                 |                           |
| 2739 | 3593 | <a href="#">NEOS13_2692</a> | peg | 3593_1695_1967   | 1695  | 1967  | + | hypothetical protein                                                                                                 |                           |
| 2740 | 3593 | <a href="#">NEOS13_2693</a> | peg | 3593_2080_2490   | 2080  | 2490  | + | hypothetical protein                                                                                                 |                           |
| 2741 | 3593 | <a href="#">NEOS13_2694</a> | peg | 3593_2635_3009   | 2635  | 3009  | + | hypothetical protein                                                                                                 |                           |
| 2742 | 3593 | <a href="#">NEOS13_2695</a> | peg | 3593_3157_3531   | 3157  | 3531  | + | hypothetical protein                                                                                                 |                           |
| 2743 | 3593 | <a href="#">NEOS13_2696</a> | peg | 3593_3851_4087   | 3851  | 4087  | + | hypothetical protein                                                                                                 |                           |
| 2744 | 3593 | <a href="#">NEOS13_2697</a> | peg | 3593_4650_4922   | 4650  | 4922  | + | hypothetical protein                                                                                                 |                           |
| 2745 | 3593 | <a href="#">NEOS13_2698</a> | peg | 3593_5241_5456   | 5241  | 5456  | + | hypothetical protein                                                                                                 |                           |
| 2746 | 3593 | <a href="#">NEOS13_2699</a> | peg | 3593_7096_5750   | 7096  | 5750  | - | hypothetical protein                                                                                                 |                           |
| 2747 | 3593 | <a href="#">NEOS13_2700</a> | peg | 3593_7120_7233   | 7120  | 7233  | + | hypothetical protein                                                                                                 |                           |
| 2748 | 3593 | <a href="#">NEOS13_2701</a> | peg | 3593_7372_7491   | 7372  | 7491  | + | hypothetical protein                                                                                                 |                           |
| 2749 | 3593 | <a href="#">NEOS13_2702</a> | peg | 3593_9469_8078   | 9469  | 8078  | - | Na(+)-translocating NADH-quinone reductase subunit A (EC 1.6.5.-)                                                    | Oxidative_Phosphorylation |
| 2750 | 3593 | <a href="#">NEOS13_2703</a> | peg | 3593_10201_9794  | 10201 | 9794  | - | hypothetical protein                                                                                                 |                           |
| 2751 | 3593 | <a href="#">NEOS13_2704</a> | peg | 3593_10568_11974 | 10568 | 11974 | + | hypothetical protein                                                                                                 |                           |
| 2752 | 3593 | <a href="#">NEOS13_2705</a> | peg | 3593_11971_14550 | 11971 | 14550 | + | General secretion pathway protein D                                                                                  | Sec_T2SS                  |
| 2753 | 3593 | <a href="#">NEOS13_2706</a> | peg | 3593_14537_16165 | 14537 | 16165 | + | General secretion pathway protein E / Type II secretory pathway, ATPase PulE/Tfp pilus assembly pathway, ATPase PilB | Sec_T2SS                  |
| 2754 | 3593 | <a href="#">NEOS13_2707</a> | peg | 3593_16172_17356 | 16172 | 17356 | + | general secretion pathway protein F                                                                                  | Sec_T2SS                  |
| 2755 | 3593 | <a href="#">NEOS13_2708</a> | peg | 3593_17377_17766 | 17377 | 17766 | + | hypothetical protein                                                                                                 |                           |
| 2756 | 3593 | <a href="#">NEOS13_2709</a> | peg | 3593_17807_18397 | 17807 | 18397 | + | hypothetical protein                                                                                                 |                           |
| 2757 | 3593 | <a href="#">NEOS13_2710</a> | peg | 3593_22943_18696 | 22943 | 18696 | - | hypothetical protein                                                                                                 |                           |
| 2758 | 3593 | <a href="#">NEOS13_2711</a> | peg | 3593_26380_23027 | 26380 | 23027 | - | hypothetical protein                                                                                                 |                           |
| 2759 | 3593 | <a href="#">NEOS13_2712</a> | peg | 3593_27181_27327 | 27181 | 27327 | + | hypothetical protein                                                                                                 |                           |
| 2760 | 3593 | <a href="#">NEOS13_2713</a> | peg | 3593_27497_28051 | 27497 | 28051 | + | hypothetical protein                                                                                                 |                           |
| 2761 | 3593 | <a href="#">NEOS13_2714</a> | peg | 3593_34565_28296 | 34565 | 28296 | - | hypothetical protein                                                                                                 |                           |
| 2762 | 3593 | <a href="#">NEOS13_2715</a> | peg | 3593_34591_34773 | 34591 | 34773 | + | hypothetical protein                                                                                                 |                           |
| 2763 | 3593 | <a href="#">NEOS13_2716</a> | peg | 3593_36329_35298 | 36329 | 35298 | - | Oxidoreductase                                                                                                       |                           |
| 2764 | 3593 | <a href="#">NEOS13_2717</a> | peg | 3593_36710_37312 | 36710 | 37312 | + | hypothetical protein                                                                                                 |                           |
| 2765 | 3593 | <a href="#">NEOS13_2718</a> | peg | 3593_37357_38034 | 37357 | 38034 | + | hypothetical protein                                                                                                 |                           |
| 2766 | 3593 | <a href="#">NEOS13_2719</a> | peg | 3593_38051_39001 | 38051 | 39001 | + | hypothetical protein                                                                                                 |                           |
| 2767 | 3593 | <a href="#">NEOS13_2720</a> | peg | 3593_38998_39981 | 38998 | 39981 | + | hypothetical protein                                                                                                 |                           |
| 2768 | 3593 | <a href="#">NEOS13_2721</a> | peg | 3593_40247_40651 | 40247 | 40651 | + | hypothetical protein                                                                                                 |                           |
| 2769 | 3593 | <a href="#">NEOS13_2722</a> | peg | 3593_40954_42330 | 40954 | 42330 | + | probable two-component response regulator                                                                            |                           |
| 2770 | 3593 | <a href="#">NEOS13_2723</a> | peg | 3593_42816_43721 | 42816 | 43721 | + | hypothetical protein                                                                                                 |                           |
| 2771 | 3593 | <a href="#">NEOS13_2724</a> | peg | 3593_43865_43713 | 43865 | 43713 | - | hypothetical protein                                                                                                 |                           |
| 2772 | 3593 | <a href="#">NEOS13_2725</a> | peg | 3593_45881_43971 | 45881 | 43971 | - | Leucine-rich repeat containing protein                                                                               | Leucine-rich repeat       |
| 2773 | 3593 | <a href="#">NEOS13_2726</a> | peg | 3593_46244_45924 | 46244 | 45924 | - | Leucine-rich repeat containing protein                                                                               | Leucine-rich repeat       |
| 2774 | 3594 | <a href="#">NEOS13_2727</a> | peg | 3594_128_370     | 128   | 370   | + | hypothetical protein                                                                                                 |                           |
| 2775 | 3595 | <a href="#">NEOS13_2728</a> | peg | 3595_110_508     | 110   | 508   | + | Transposase                                                                                                          | Transposase               |
| 2776 | 3595 | <a href="#">NEOS13_2729</a> | peg | 3595_501_782     | 501   | 782   | + | transposase                                                                                                          | Transposase               |
| 2777 | 3595 | <a href="#">NEOS13_2730</a> | peg | 3595_814_978     | 814   | 978   | + | hypothetical protein                                                                                                 |                           |
| 2778 | 3595 | <a href="#">NEOS13_2731</a> | peg | 3595_2078_1005   | 2078  | 1005  | - | Mobile element protein                                                                                               |                           |
| 2779 | 3596 | <a href="#">NEOS13_2732</a> | peg | 3596_293_550     | 293   | 550   | + | transposase                                                                                                          | Transposase               |
| 2780 | 3596 | <a href="#">NEOS13_2733</a> | peg | 3596_760_1359    | 760   | 1359  | + | LemA protein                                                                                                         |                           |
| 2781 | 3596 | <a href="#">NEOS13_2734</a> | peg | 3596_1434_2423   | 1434  | 2423  | + | Heat shock protein HtpX (EC 3.4.24.-)                                                                                |                           |
| 2782 | 3596 | <a href="#">NEOS13_2735</a> | peg | 3596_2942_2826   | 2942  | 2826  | - | hypothetical protein                                                                                                 |                           |
| 2783 | 3596 | <a href="#">NEOS13_2736</a> | peg | 3596_3620_3162   | 3620  | 3162  | - | DoxX                                                                                                                 |                           |
| 2784 | 3596 | <a href="#">NEOS13_2737</a> | peg | 3596_4117_4308   | 4117  | 4308  | + | hypothetical protein                                                                                                 |                           |
| 2785 | 3596 | <a href="#">NEOS13_2738</a> | peg | 3596_4475_6853   | 4475  | 6853  | + | hypothetical protein                                                                                                 |                           |
| 2786 | 3596 | <a href="#">NEOS13_2739</a> | peg | 3596_7066_8010   | 7066  | 8010  | + | hypothetical protein                                                                                                 |                           |
| 2787 | 3596 | <a href="#">NEOS13_2740</a> | peg | 3596_8594_8100   | 8594  | 8100  | - | hypothetical protein                                                                                                 |                           |
| 2788 | 3596 | <a href="#">NEOS13_2741</a> | peg | 3596_9571_8627   | 9571  | 8627  | - | Cobalt-zinc-cadmium resistance protein                                                                               |                           |
| 2789 | 3596 | <a href="#">NEOS13_2742</a> | peg | 3596_10269_14324 | 10269 | 14324 | + | hypothetical protein                                                                                                 |                           |
| 2790 | 3596 | <a href="#">NEOS13_2743</a> | peg | 3596_14616_14732 | 14616 | 14732 | + | hypothetical protein                                                                                                 |                           |
| 2791 | 3596 | <a href="#">NEOS13_2744</a> | peg | 3596_18258_14830 | 18258 | 14830 | - | hypothetical protein                                                                                                 |                           |
| 2792 | 3596 | <a href="#">NEOS13_2745</a> | peg | 3596_20591_18321 | 20591 | 18321 | - | hypothetical protein                                                                                                 |                           |
| 2793 | 3596 | <a href="#">NEOS13_2746</a> | peg | 3596_21088_20867 | 21088 | 20867 | - | hypothetical protein                                                                                                 |                           |
| 2794 | 3596 | <a href="#">NEOS13_2747</a> | peg | 3596_21693_21340 | 21693 | 21340 | - | RNA-binding protein                                                                                                  |                           |
| 2795 | 3596 | <a href="#">NEOS13_2748</a> | peg | 3596_22456_22100 | 22456 | 22100 | - | RNA-binding protein                                                                                                  |                           |
| 2796 | 3596 | <a href="#">NEOS13_2749</a> | peg | 3596_23291_22842 | 23291 | 22842 | - | hypothetical protein                                                                                                 |                           |
| 2797 | 3596 | <a href="#">NEOS13_2750</a> | peg | 3596_23299_23412 | 23299 | 23412 | + | hypothetical protein                                                                                                 |                           |
| 2798 | 3596 | <a href="#">NEOS13_2751</a> | peg | 3596_24186_23542 | 24186 | 23542 | - | hypothetical protein                                                                                                 |                           |
| 2799 | 3596 | <a href="#">NEOS13_2752</a> | peg | 3596_24496_26091 | 24496 | 26091 | + | Oligopeptide ABC transporter, periplasmic oligopeptide-binding protein OppA (TC 3.A.1.5.1)                           | ABC_transporter           |
| 2800 | 3596 | <a href="#">NEOS13_2753</a> | peg | 3596_26229_26062 | 26229 | 26062 | - | hypothetical protein                                                                                                 |                           |
| 2801 | 3596 | <a href="#">NEOS13_2754</a> | peg | 3596_28069_26417 | 28069 | 26417 | - | Pyrophosphate--fructose 6-phosphate 1-phosphotransferase, beta subunit (EC 2.7.1.90)                                 |                           |
| 2802 | 3596 | <a href="#">NEOS13_2755</a> | peg | 3596_28899_28105 | 28899 | 28105 | - | hypothetical protein                                                                                                 |                           |
| 2803 | 3596 | <a href="#">NEOS13_2756</a> | peg | 3596_29306_29184 | 29306 | 29184 | - | hypothetical protein                                                                                                 |                           |
| 2804 | 3596 | <a href="#">NEOS13_2757</a> | peg | 3596_29829_29653 | 29829 | 29653 | - | hypothetical protein                                                                                                 |                           |
| 2805 | 3596 | <a href="#">NEOS13_2758</a> | peg | 3596_31267_29846 | 31267 | 29846 | - | hypothetical protein                                                                                                 |                           |
| 2806 | 3596 | <a href="#">NEOS13_2759</a> | peg | 3596_32256_31972 | 32256 | 31972 | - | hypothetical protein                                                                                                 |                           |
| 2807 | 3596 | <a href="#">NEOS13_2760</a> | peg | 3596_32351_32878 | 32351 | 32878 | + | hypothetical protein                                                                                                 |                           |
| 2808 | 3596 | <a href="#">NEOS13_2761</a> | peg | 3596_32954_33082 | 32954 | 33082 | + | hypothetical protein                                                                                                 |                           |

|      |      |                               |     |                  |       |       |   |                                                                                 |                     |
|------|------|-------------------------------|-----|------------------|-------|-------|---|---------------------------------------------------------------------------------|---------------------|
| 2809 | 3596 | <a href="#">NEOS13_2762</a>   | peg | 3596_33364_34218 | 33364 | 34218 | + | Formamidopyrimidine-DNA glycosylase (EC 3.2.2.23)                               |                     |
| 2810 | 3596 | <a href="#">NEOS13_2763</a>   | peg | 3596_34199_34807 | 34199 | 34807 | + | HAD-superfamily hydrolase, subfamily 1A, variant 3                              |                     |
| 2811 | 3596 | <a href="#">NEOS13_2764</a>   | peg | 3596_35011_35550 | 35011 | 35550 | + | hypothetical protein                                                            |                     |
| 2812 | 3596 | <a href="#">NEOS13_2765</a>   | peg | 3596_35756_36943 | 35756 | 36943 | + | 2-amino-3-ketobutyrate coenzyme A ligase (EC 2.3.1.29)                          |                     |
| 2813 | 3596 | <a href="#">NEOS13_2766</a>   | peg | 3596_36982_38016 | 36982 | 38016 | + | L-threonine 3-dehydrogenase (EC 1.1.1.103)                                      |                     |
| 2814 | 3596 | <a href="#">NEOS13_0048ma</a> | rna | 3596_39199_39127 | 39199 | 39127 | - | tRNA-Met-CAT                                                                    | RNA                 |
| 2815 | 3596 | <a href="#">NEOS13_0049ma</a> | rna | 3596_39278_39206 | 39278 | 39206 | - | tRNA-Met-CAT                                                                    | RNA                 |
| 2816 | 3596 | <a href="#">NEOS13_2767</a>   | peg | 3596_40670_39378 | 40670 | 39378 | - | 3-deoxy-D-manno-octulosonic-acid transferase (EC 2.-.-)                         |                     |
| 2817 | 3596 | <a href="#">NEOS13_2768</a>   | peg | 3596_41113_40994 | 41113 | 40994 | - | hypothetical protein                                                            |                     |
| 2818 | 3596 | <a href="#">NEOS13_2769</a>   | peg | 3596_43358_41130 | 43358 | 41130 | - | Transcription accessory protein (S1 RNA-binding domain)                         |                     |
| 2819 | 3596 | <a href="#">NEOS13_2770</a>   | peg | 3596_44164_43721 | 44164 | 43721 | - | hypothetical protein                                                            |                     |
| 2820 | 3596 | <a href="#">NEOS13_2771</a>   | peg | 3596_44309_44196 | 44309 | 44196 | - | hypothetical protein                                                            |                     |
| 2821 | 3596 | <a href="#">NEOS13_2772</a>   | peg | 3596_44409_44573 | 44409 | 44573 | + | hypothetical protein                                                            |                     |
| 2822 | 3596 | <a href="#">NEOS13_2773</a>   | peg | 3596_44692_45408 | 44692 | 45408 | + | dienelactone hydrolase family protein                                           |                     |
| 2823 | 3596 | <a href="#">NEOS13_2774</a>   | peg | 3596_45414_45743 | 45414 | 45743 | + | hypothetical protein                                                            |                     |
| 2824 | 3596 | <a href="#">NEOS13_2775</a>   | peg | 3596_45977_46510 | 45977 | 46510 | + | hypothetical protein                                                            |                     |
| 2825 | 3596 | <a href="#">NEOS13_2776</a>   | peg | 3596_46577_47395 | 46577 | 47395 | + | hypothetical protein                                                            |                     |
| 2826 | 3596 | <a href="#">NEOS13_2777</a>   | peg | 3596_47421_47936 | 47421 | 47936 | + | Peptidyl-prolyl cis-trans isomerase (EC 5.2.1.8)                                |                     |
| 2827 | 3596 | <a href="#">NEOS13_2778</a>   | peg | 3596_47942_48097 | 47942 | 48097 | + | hypothetical protein                                                            |                     |
| 2828 | 3596 | <a href="#">NEOS13_2779</a>   | peg | 3596_48567_48439 | 48567 | 48439 | - | hypothetical protein                                                            |                     |
| 2829 | 3596 | <a href="#">NEOS13_2780</a>   | peg | 3596_51409_48587 | 51409 | 48587 | - | Leucine-rich repeat containing protein                                          | Leucine-rich repeat |
| 2830 | 365  | <a href="#">NEOS13_2781</a>   | peg | 365_170_54       | 170   | 54    | - | hypothetical protein                                                            |                     |
| 2831 | 389  | <a href="#">NEOS13_2782</a>   | peg | 389_240_34       | 240   | 34    | - | hypothetical protein                                                            |                     |
| 2832 | 484  | <a href="#">NEOS13_2783</a>   | peg | 484_1281_148     | 1281  | 148   | - | Leucine-rich repeat containing protein                                          | Leucine-rich repeat |
| 2833 | 484  | <a href="#">NEOS13_2784</a>   | peg | 484_1470_1625    | 1470  | 1625  | + | hypothetical protein                                                            |                     |
| 2834 | 484  | <a href="#">NEOS13_2785</a>   | peg | 484_2384_1662    | 2384  | 1662  | - | putative biotin-[acetyl-CoA-carboxylase] ligase/biotin repressor (bifunctional) |                     |
| 2835 | 484  | <a href="#">NEOS13_2786</a>   | peg | 484_2438_3574    | 2438  | 3574  | + | Rod shape-determining protein RodA                                              |                     |
| 2836 | 484  | <a href="#">NEOS13_2787</a>   | peg | 484_3574_4023    | 3574  | 4023  | + | hypothetical protein                                                            |                     |
| 2837 | 484  | <a href="#">NEOS13_2788</a>   | peg | 484_4155_4313    | 4155  | 4313  | + | hypothetical protein                                                            |                     |
| 2838 | 484  | <a href="#">NEOS13_2789</a>   | peg | 484_5008_4652    | 5008  | 4652  | - | SSU ribosomal protein S10p (S20e)                                               |                     |
| 2839 | 484  | <a href="#">NEOS13_2790</a>   | peg | 484_7109_5022    | 7109  | 5022  | - | Translation elongation factor G                                                 |                     |
| 2840 | 484  | <a href="#">NEOS13_2791</a>   | peg | 484_7601_7128    | 7601  | 7128  | - | SSU ribosomal protein S7p (S5e)                                                 |                     |
| 2841 | 484  | <a href="#">NEOS13_2792</a>   | peg | 484_8160_7789    | 8160  | 7789  | - | SSU ribosomal protein S12p (S23e)                                               |                     |
| 2842 | 484  | <a href="#">NEOS13_2793</a>   | peg | 484_8259_9509    | 8259  | 9509  | + | 1-deoxy-D-xylulose 5-phosphate reductoisomerase (EC 1.1.1.267)                  |                     |
| 2843 | 484  | <a href="#">NEOS13_2794</a>   | peg | 484_9972_11852   | 9972  | 11852 | + | Membrane-associated zinc metalloprotease                                        |                     |
| 2844 | 529  | <a href="#">NEOS13_2795</a>   | peg | 529_205_32       | 205   | 32    | - | hypothetical protein                                                            |                     |
| 2845 | 571  | <a href="#">NEOS13_2796</a>   | peg | 571_3774_577     | 3774  | 577   | - | ankyrin repeat protein                                                          | Ankyrin             |
| 2846 | 571  | <a href="#">NEOS13_2797</a>   | peg | 571_5313_3904    | 5313  | 3904  | - | Protein RtcB                                                                    |                     |
| 2847 | 685  | <a href="#">NEOS13_2798</a>   | peg | 685_122_9        | 122   | 9     | - | hypothetical protein                                                            |                     |
| 2848 | 775  | <a href="#">NEOS13_2799</a>   | peg | 775_178_29       | 178   | 29    | - | Leucine-rich repeat containing protein                                          | Leucine-rich repeat |
| 2849 | 865  | <a href="#">NEOS13_2800</a>   | peg | 865_365_204      | 365   | 204   | - | hypothetical protein                                                            |                     |
| 2850 | 866  | <a href="#">NEOS13_2801</a>   | peg | 866_270_61       | 270   | 61    | - | Leucine-rich repeat containing protein                                          | Leucine-rich repeat |
| 2851 | 866  | <a href="#">NEOS13_2802</a>   | peg | 866_258_407      | 258   | 407   | + | hypothetical protein                                                            |                     |
| 2852 | 728  | <a href="#">NEOS13_2803</a>   | peg | 728_3_134        | 3     | 134   | + | transposase                                                                     | Transposase         |
| 2853 | 635  | <a href="#">NEOS13_2804</a>   | peg | 635_2_121        | 2     | 121   | + | transposase                                                                     | Transposase         |
| 2854 | 2642 | <a href="#">NEOS13_2805</a>   | peg | 2642_3_233       | 3     | 233   | + | Leucine-rich repeat containing protein                                          | Leucine-rich repeat |
| 2855 | 1116 | <a href="#">NEOS13_2806</a>   | peg | 1116_1_219       | 1     | 219   | - | Leucine-rich repeat containing protein                                          | Leucine-rich repeat |
| 2856 | 2733 | <a href="#">NEOS13_2807</a>   | peg | 2733_2_211       | 2     | 211   | + | Leucine-rich repeat containing protein                                          | Leucine-rich repeat |
| 2857 | 1111 | <a href="#">NEOS13_2808</a>   | peg | 1111_1_210       | 1     | 210   | - | Leucine-rich repeat containing protein                                          | Leucine-rich repeat |
| 2858 | 1798 | <a href="#">NEOS13_2809</a>   | peg | 1798_2_202       | 2     | 202   | - | Leucine-rich repeat containing protein                                          | Leucine-rich repeat |
| 2859 | 1703 | <a href="#">NEOS13_2810</a>   | peg | 1703_2_193       | 2     | 193   | - | Leucine-rich repeat containing protein                                          | Leucine-rich repeat |
| 2860 | 501  | <a href="#">NEOS13_2811</a>   | peg | 501_1_189        | 1     | 189   | + | Leucine-rich repeat containing protein                                          | Leucine-rich repeat |
| 2861 | 1551 | <a href="#">NEOS13_2812</a>   | peg | 1551_1_183       | 1     | 183   | - | Leucine-rich repeat containing protein                                          | Leucine-rich repeat |
| 2862 | 2456 | <a href="#">NEOS13_2813</a>   | peg | 2456_3_173       | 3     | 173   | - | Leucine-rich repeat containing protein                                          | Leucine-rich repeat |
| 2863 | 2575 | <a href="#">NEOS13_2814</a>   | peg | 2575_3_170       | 3     | 170   | - | Leucine-rich repeat containing protein                                          | Leucine-rich repeat |
| 2864 | 2486 | <a href="#">NEOS13_2815</a>   | peg | 2486_2_169       | 2     | 169   | + | Leucine-rich repeat containing protein                                          | Leucine-rich repeat |
| 2865 | 2732 | <a href="#">NEOS13_2816</a>   | peg | 2732_2_166       | 2     | 166   | + | Leucine-rich repeat containing protein                                          | Leucine-rich repeat |
| 2866 | 856  | <a href="#">NEOS13_2817</a>   | peg | 856_3_158        | 3     | 158   | - | Leucine-rich repeat containing protein                                          | Leucine-rich repeat |
| 2867 | 3038 | <a href="#">NEOS13_2818</a>   | peg | 3038_3_149       | 3     | 149   | - | Leucine-rich repeat containing protein                                          | Leucine-rich repeat |
| 2868 | 803  | <a href="#">NEOS13_2819</a>   | peg | 803_2_139        | 2     | 139   | + | Leucine-rich repeat containing protein                                          | Leucine-rich repeat |
| 2869 | 1712 | <a href="#">NEOS13_2820</a>   | peg | 1712_3_134       | 3     | 134   | + | Leucine-rich repeat containing protein                                          | Leucine-rich repeat |
| 2870 | 730  | <a href="#">NEOS13_2821</a>   | peg | 730_2_133        | 2     | 133   | + | Leucine-rich repeat containing protein                                          | Leucine-rich repeat |
| 2871 | 1787 | <a href="#">NEOS13_2822</a>   | peg | 1787_3_131       | 3     | 131   | - | Leucine-rich repeat containing protein                                          | Leucine-rich repeat |
| 2872 | 2417 | <a href="#">NEOS13_2823</a>   | peg | 2417_2_127       | 2     | 127   | + | Leucine-rich repeat containing protein                                          | Leucine-rich repeat |
| 2873 | 1921 | <a href="#">NEOS13_2824</a>   | peg | 1921_1_126       | 1     | 126   | - | Leucine-rich repeat containing protein                                          | Leucine-rich repeat |
| 2874 | 1178 | <a href="#">NEOS13_2825</a>   | peg | 1178_1_123       | 1     | 123   | - | Leucine-rich repeat containing protein                                          | Leucine-rich repeat |
| 2875 | 2984 | <a href="#">NEOS13_2826</a>   | peg | 2984_1_123       | 1     | 123   | - | Leucine-rich repeat containing protein                                          | Leucine-rich repeat |
| 2876 | 1631 | <a href="#">NEOS13_2827</a>   | peg | 1631_1_116       | 3     | 116   | - | Leucine-rich repeat containing protein                                          | Leucine-rich repeat |
| 2877 | 1191 | <a href="#">NEOS13_2828</a>   | peg | 1191_3_113       | 3     | 113   | - | Leucine-rich repeat containing protein                                          | Leucine-rich repeat |
| 2878 | 3484 | <a href="#">NEOS13_2829</a>   | peg | 3484_10062_10217 | 10062 | 10217 | - | hypothetical protein                                                            |                     |
| 2879 | 2884 | <a href="#">NEOS13_2830</a>   | peg | 2884_1_240       | 1     | 240   | - | hypothetical protein                                                            |                     |
| 2880 | 2195 | <a href="#">NEOS13_2831</a>   | peg | 2195_2_139       | 2     | 139   | + | hypothetical protein                                                            |                     |
| 2881 | 691  | <a href="#">NEOS13_2832</a>   | peg | 691_2_199        | 2     | 199   | + | hypothetical protein                                                            |                     |
