# Supplementary material for: Amoebal Endosymbiont Neochlamydia Genome Sequence Illuminates the Bacterial Role in the Defense of the Host Amoebae against Legionella pneumophila
Source: PubMed Central journal article supplement (PMC3991601; doi:10.1371/journal.pone.0095166), 2014-04-18
Supplement: pone.0095166.s014.pdf [file pone.0095166.s014.pdf]

**Table S2.** Homologs of eukaryote genes in *Neochlamydia* S13 genes encoding predicted LRR-molecules

| Gene feature ID (RAST) | contig number | strand | nuc length | pep length | nr database BLASTP* (Accession number)                                                                                                                              | Length | Score           | Identities  | E value |
|------------------------|---------------|--------|------------|------------|---------------------------------------------------------------------------------------------------------------------------------------------------------------------|--------|-----------------|-------------|---------|
| NEOS13_2442            | 3583          | -      | 303        | 100        | ref XP_002507353.1  u-box domain/leucine-rich repeat protein [Micromonas sp. RCC299]gb ACO68611.1  u-box domain/leucine-rich repeat protein [Micromonas sp. RCC299] | 426    | 71.2 bits (173) | 45/99 (45%) | 4E-11   |
| NEOS13_0718            | 3407          | +      | 174        | 57         | [No hits found]                                                                                                                                                     |        |                 |             |         |
| NEOS13_0110            | 3329          | +      | 222        | 73         | ref XP_002503775.1  predicted protein [Micromonas sp. RCC299]gb ACO65033.1  predicted protein [Micromonas sp. RCC299]                                               | 406    | 80.1 bits (196) | 43/69 (62%) | 1E-13   |
| NEOS13_1509            | 3488          | +      | 402        | 133        | ref XP_002509372.1  predicted protein [Micromonas sp. RCC299]gb ACO70630.1  predicted protein [Micromonas sp. RCC299]                                               | 140    | 89.0 bits (219) | 47/80 (58%) | 2E-16   |
| NEOS13_0001            | 1145          | +      | 150        | 49         | [No hits found]                                                                                                                                                     |        |                 |             |         |
| NEOS13_2799            | 775           | -      | 234        | 77         | ref XP_002508629.1  hypothetical protein MICPUN_62214 [Micromonas sp. RCC299]gb ACO69887.1  hypothetical protein MICPUN_62214 [Micromonas sp. RCC299]               | 1098   | 79.7 bits (195) | 40/74 (54%) | 1E-13   |
| NEOS13_2805            | 2642          | +      | 231        | 77         | [No hits found]                                                                                                                                                     |        |                 |             |         |
| NEOS13_2806            | 1116          | -      | 219        | 73         | ref XP_002503775.1  predicted protein [Micromonas sp. RCC299]gb ACO65033.1  predicted protein [Micromonas sp. RCC299]                                               | 406    | 89.4 bits (220) | 48/72 (66%) | 2E-16   |
| NEOS13_2807            | 2733          | +      | 210        | 70         | ref XP_002507451.1  predicted protein [Micromonas sp. RCC299]gb ACO68709.1  predicted protein [Micromonas sp. RCC299]                                               | 395    | 86.3 bits (212) | 46/70 (65%) | 2E-15   |
| NEOS13_2808            | 1111          | -      | 210        | 70         | ref XP_002503067.1  predicted protein [Micromonas sp. RCC299]gb ACO64325.1  predicted protein [Micromonas sp. RCC299]                                               | 252    | 93.6 bits (231) | 45/70 (64%) | 9E-18   |
| NEOS13_2809            | 1798          | -      | 201        | 67         | ref YP_001869272.1  Miro domain-containing protein [Nostoc punctiforme PCC 73102]gb ACC84329.1  Miro domain protein [Nostoc punctiforme PCC 73102]                  | 1109   | 83.6 bits (205) | 45/66 (68%) | 8E-15   |
| NEOS13_2810            | 1703          | -      | 192        | 64         | ref XP_002505627.1  predicted protein [Micromonas sp. RCC299]gb ACO66885.1  predicted protein [Micromonas sp. RCC299]                                               | 573    | 80.9 bits (198) | 40/64 (62%) | 6E-14   |
| NEOS13_2811            | 501           | +      | 189        | 63         | ref XP_002507358.1  predicted protein [Micromonas sp. RCC299]gb ACO68616.1  predicted protein [Micromonas sp. RCC299]                                               | 574    | 83.2 bits (204) | 42/62 (67%) | 1E-14   |
| NEOS13_2812            | 1551          | -      | 183        | 61         | ref XP_002509372.1  predicted protein [Micromonas sp. RCC299]gb ACO70630.1  predicted protein [Micromonas sp. RCC299]                                               | 140    | 78.2 bits (191) | 39/60 (65%) | 4E-13   |
| NEOS13_2813            | 2456          | -      | 171        | 57         | ref XP_002503067.1  predicted protein [Micromonas sp. RCC299]gb ACO64325.1  predicted protein [Micromonas sp. RCC299]                                               | 252    | 73.9 bits (180) | 36/57 (63%) | 7E-12   |
| NEOS13_2814            | 2575          | -      | 168        | 56         | ref YP_001869272.1  Miro domain-containing protein [Nostoc punctiforme PCC 73102]gb ACC84329.1  Miro domain protein [Nostoc punctiforme PCC 73102]                  | 1109   | 73.2 bits (178) | 38/56 (67%) | 1E-11   |
| NEOS13_2815            | 2486          | +      | 168        | 56         | [No hits found]                                                                                                                                                     |        |                 |             |         |
| NEOS13_2816            | 2732          | +      | 165        | 55         | ref XP_002508688.1  predicted protein [Micromonas sp. RCC299]gb ACO69946.1  predicted protein [Micromonas sp. RCC299]                                               | 518    | 77.4 bits (189) | 41/55 (74%) | 7E-13   |
| NEOS13_2817            | 856           | -      | 156        | 52         | ref XP_002505627.1  predicted protein [Micromonas sp. RCC299]gb ACO66885.1  predicted protein [Micromonas sp. RCC299]                                               | 573    | 70.5 bits (171) | 33/52 (63%) | 9E-11   |
| NEOS13_2818            | 3038          | -      | 147        | 49         | [No hits found]                                                                                                                                                     |        |                 |             |         |
| NEOS13_2819            | 803           | +      | 138        | 46         | [No hits found]                                                                                                                                                     |        |                 |             |         |
| NEOS13_2820            | 1712          | +      | 132        | 44         | [No hits found]                                                                                                                                                     |        |                 |             |         |
| NEOS13_2821            | 730           | +      | 132        | 44         | [No hits found]                                                                                                                                                     |        |                 |             |         |
| NEOS13_2822            | 1787          | -      | 129        | 43         | [No hits found]                                                                                                                                                     |        |                 |             |         |
| NEOS13_2823            | 2417          | +      | 126        | 42         | [No hits found]                                                                                                                                                     |        |                 |             |         |
| NEOS13_2824            | 1921          | -      | 126        | 42         | [No hits found]                                                                                                                                                     |        |                 |             |         |
| NEOS13_2825            | 1178          | -      | 123        | 41         | [No hits found]                                                                                                                                                     |        |                 |             |         |
| NEOS13_2826            | 2984          | -      | 123        | 41         | [No hits found]                                                                                                                                                     |        |                 |             |         |
| NEOS13_2827            | 1631          | -      | 114        | 38         | [No hits found]                                                                                                                                                     |        |                 |             |         |
| NEOS13_2828            | 1191          | -      | 111        | 37         | [No hits found]                                                                                                                                                     |        |                 |             |         |

\*BLASTP cutoff: 1.00E-10
